# Supplementary material for: H2A.Z Acidic Patch Couples Chromatin Dynamics to Regulation of Gene Expression Programs during ESC Differentiation
Source: PLoS Genet. 2013 Aug 22;9(8):e1003725. doi: 10.1371/journal.pgen.1003725 (PMC3749939; doi:10.1371/journal.pgen.1003725)
Supplement: Table S2 — RNA-Seq analyses in H2A.ZWT, H2A.ZKD and H2A.ZAP3 during ESC differentiation. (XLSX) [file pgen.1003725.s007.xlsx]

## Sheet: Table Key
Table S2. RNA-Seq analyses in H2A.ZWT, H2A.ZKD and H2A.ZAP3 during ESC differentiation
Refers to Figure 3 and Figure S3 in Subramanian et al.
RNA-Seq Analyses-D0: Contains Cufflinks generated RPKM values for H2A.ZWT, H2A.ZKD and H2A.ZAP3 ESCs (E5-G5).
Fold difference in expression of H2A.ZKD and H2A.ZAP3 relative to H2A.ZWT and H2A.ZAP3 relative to H2A.ZKD are represented in columns labeled log2 (fc H2A.ZKD/H2A.ZWT), log2 (fc H2A.ZAP3/H2A.ZWT) and log2 (fc H2A.ZAP3/H2A.ZKD) respectively.
The histone marks associated with the listed genes are indicated by the following code: 1-H3K4me3, 2-Bivalent (H3K4me3 + H3K27me3)
RNA-Seq Analyses-D3: Contains Cufflinks generated RPKM values for H2A.ZWT, H2A.ZKD and H2A.Z AP3 Day 3 EBs (E5-G5).
Fold difference in expression of H2A.ZKD and H2A.ZAP3 relative to H2A.ZWT and H2A.ZAP3 relative to H2A.ZKD are represented in columns labeled log2 (fc H2A.ZKD/H2A.ZWT), log2 (fcH2A.Z AP3/H2A.ZWT) and log2 (fc H2A.Z AP3/H2A.ZKD) respectively.
The histone marks associated with the listed genes are indicated by the following code: 1-H3K4me3, 2-Bivalent (H3K4me3 + H3K27me3)
KS stats: Tables listing the Kolmogorov-Smirnov (KS) statistics and D values generated from the indicated cumulative distribution frequency plots using RNA-Seq data.
QC metrics: RNA-Seq quality control parameters

## Sheet: RNA-Seq Analyses-D0
Table S2: RNA-Seq analyses of H2A.ZWT, H2A.ZKD and H2A.ZAP3 Day 0 EBs (Genome Build: mm9)
RNA-Seq analyses
RefseqID	GeneID	Location	CuffLinks_TSS	H2A.ZWT_RPKM	H2A.ZKD_RPKM	H2A.ZAP3_RPKM	Number_of_isoforms_sharing_this_TSS	log2(fc H2A.ZKD/H2A.ZWT)	log2(fcH2A.ZAP3/H2A.ZWT)	log2(fc H2A.ZAP3/H2A.ZKD)	HistoneMark	Number_of_regions_with_H3K27me3_marks	length_H3K27me3-bound-regions	Number_of_regions_with_H3K4me4_marks	length_H3K4me3-bound-regions
NM_008866	Lypla1	chr1_4795973-4799974	TSS1	53.0262	49.7458	37.8628	1	-0.0921288	-0.485913	-0.393785	1	0	0	2	1425
NM_021511	Rrs1	chr1_9533488-9537489	TSS10	41.7614	52.6656	36.8604	1	0.334684	-0.180094	-0.514777	1	0	0	1	2025
NM_024283	1500015O10Rik	chr1_43785446-43789447	TSS100	0.144188	0.454696	0.163799	1	1.65015	0.182785	-1.46736	1	0	0	1	575
NM_182716	Nfasc	chr1_134636374-134640375	TSS1001	0	0	0	2	0	0	0	1	0	0	1	1275
NM_001160317	Nfasc	chr1_134636374-134640375	TSS1002	0.626907	1.01659	0.270738	5	0.696541	-1.20834	-1.90488	1	0	0	1	1275
NM_008139	Gnaq	chr19_16205320-16209321	TSS10023	10.892	10.5583	9.42936	1	-0.0448871	-0.208017	-0.163129	1	0	0	1	2050
NM_008137	Gna14	chr19_16508156-16512157	TSS10025	3.11861	2.42469	9.33943	1	-0.36297	1.58212	1.94509	1	0	0	1	1925
NM_181348	Prune2	chr19_17028607-17032608	TSS10026	1.88781	1.5037	2.1246	1	-0.328002	0.170393	0.498394	2	1	175	1	800
NM_019437	Rfk	chr19_17466532-17470533	TSS10027	18.0653	16.8059	18.892	1	-0.104247	0.0645507	0.168798	1	0	0	1	1075
NM_145497	BC016495	chr19_18704505-18708506	TSS10028	10.3464	7.17655	10.9581	1	-0.527705	0.082861	0.610566	1	0	0	1	1250
NM_026120	2410127L17Rik	chr19_18743269-18747270	TSS10029	32.2589	32.1593	31.1543	1	-0.0044611	-0.0502644	-0.0458033	1	0	0	1	1325
NM_008575	Mdm4	chr1_134919925-134923926	TSS1003	53.4835	40.282	53.0528	1	-0.40895	-0.0116648	0.397285	1	0	0	2	2150
NM_177640	D030056L22Rik	chr19_18785725-18789726	TSS10030	27.4901	24.3578	25.6552	1	-0.174522	-0.0996571	0.0748644	1	0	0	1	2275
NM_153417	Trpm6	chr19_18822472-18826473	TSS10031	0.0783639	0.121459	0.229911	1	0.625744	1.54078	0.915038	1	0	0	1	800
NM_009551	Zfand5	chr19_21344767-21348768	TSS10034	37.6854	35.1083	30.7711	1	-0.102191	-0.292421	-0.19023	1	0	0	3	2193
NM_146096	Fam108b	chr19_21725798-21729799	TSS10035	11.837	12.9817	11.3424	1	0.133165	-0.0615722	-0.194737	1	0	0	1	1925
NM_031997	Tmem2	chr19_21850831-21854832	TSS10036	25.353	22.7298	28.2807	2	-0.157569	0.157655	0.315224	1	0	0	1	2500
NM_001035243	Trpm3	chr19_22211606-22215607	TSS10037	0.8932	0.0301203	0	11	-4.84467	-9.80445	-4.95979	1	0	0	1	750
NM_177341	Trpm3	chr19_22520697-22524698	TSS10038	2.08e-05	0.00217749	0.0210617	4	1.63819	4.43377	2.79558	1	0	0	1	225
NM_177341	Trpm3	chr19_22520697-22524698	TSS10039	0	0	0	2	0	0	0	1	0	0	1	225
NM_011439	Sox13	chr1_135318789-135322790	TSS1004	5.54805	5.88191	4.72774	1	0.0842892	-0.230785	-0.315074	1	0	0	1	2511
NM_010638	Klf9	chr19_23213715-23217716	TSS10041	42.658	40.4563	36.414	1	-0.0764501	-0.228317	-0.151867	1	0	0	1	2766
NR_035423	Mir1192	chr19_23221920-23225921	TSS10042	0.951141	0	0	1	-9.89503	-9.89503	0	1	0	0	3	2476
NM_028208	Ptar1	chr19_23759889-23763890	TSS10043	2.75893	2.22664	1.94902	1	-0.309116	-0.501143	-0.192027	1	0	0	2	1175
NM_177034	Apba1	chr19_23831365-23835366	TSS10044	0.178582	0.126475	0.17144	1	-0.494428	-0.0585483	0.43588	2	1	400	1	1825
NM_028785	Dock8	chr19_25072018-25076019	TSS10046	0.228354	0.278458	0.126225	1	0.285055	-0.850194	-1.13525	2	3	2019	1	1025
NM_181404	Kank1	chr19_25309691-25313692	TSS10047	4.63387	4.56881	4.79772	1	-0.0203947	0.0501208	0.0705155	1	0	0	1	2075
NM_015826	Dmrt1	chr19_25578195-25582196	TSS10048	13.818	20.8997	13.9354	1	0.596898	0.0122047	-0.584693	2	2	425	1	1650
NM_177360	Dmrt3	chr19_25683026-25687027	TSS10049	0.531836	0.845572	0.75699	1	0.667941	0.508487	-0.159454	2	3	3126	1	1650
NM_009227	Snrpe	chr1_135504857-135508858	TSS1005	199.816	186.23	187.542	1	-0.101586	-0.0914579	0.0101282	1	0	0	1	1475
NM_145831	Dmrt2	chr19_25744900-25748901	TSS10050	0.129674	0.0160716	0.155141	1	-2.9363	0.256877	3.19318	2	4	2826	2	1975
NM_011416	Smarca2	chr19_26677649-26681650	TSS10051	0.88149	0.881973	1.44327	1	0.000789393	0.710689	0.709899	2	5	1625	1	2950
NM_026003	Smarca2	chr19_26820892-26824893	TSS10052	1.13321	0.781346	1.89457	1	-0.535809	0.740944	1.27675	1	0	0	1	375
NM_013703	Vldlr	chr19_27289509-27293510	TSS10054	2.02313	2.13147	2.97376	2	0.0752234	0.555468	0.480245	2	2	1175	1	2610
NM_183179	Kcnv2	chr19_27395108-27399109	TSS10055	0.0113858	0.011122	0.0146877	1	-0.0310593	0.340947	0.372006	1	0	0	1	975
NR_027987	C030016D13Rik	chr19_27502526-27506527	TSS10056	0.0270613	0	0.0168185	1	-4.81051	-0.655206	4.1553	1	0	0	1	2550
NM_009199	Slc1a1	chr19_28907655-28911656	TSS10057	0.860984	0.833262	1.10675	1	-0.0471606	0.361899	0.40906	2	2	625	1	1425
NM_028922	Ppapdc2	chr19_29036409-29040410	TSS10058	1.58413	1.3371	1.17891	1	-0.244415	-0.425924	-0.181509	1	0	0	1	1250
NM_025950	Cdc37l1	chr19_29062983-29066984	TSS10059	18.4238	17.6314	15.8339	1	-0.0634201	-0.218541	-0.155121	1	0	0	2	1825
NM_144530	Zc3h11a	chr1_135555957-135559958	TSS1006	42.4856	46.8615	42.7492	1	0.141426	0.00892327	-0.132503	1	0	0	2	1300
NR_028360	1700018L02Rik	chr19_29119972-29123973	TSS10060	0.0462861	0.0971331	0.180875	1	1.05332	1.94346	0.890136	1	0	0	1	1125
NM_021525	Rcl1	chr19_29173864-29177865	TSS10061	30.4017	29.1591	29.9046	1	-0.0602038	-0.0237838	0.03642	1	0	0	2	1875
NM_008413	Jak2	chr19_29324317-29328318	TSS10063	3.60006	2.65292	4.44638	2	-0.440296	0.304534	0.74483	2	1	200	1	1750
NM_021893	Cd274	chr19_29439927-29443928	TSS10064	1.16596	0.943411	0.492485	1	-0.305268	-1.24168	-0.936409	1	0	0	1	550
NM_001081319	C030046E11Rik	chr19_29594771-29598772	TSS10066	9.50823	8.64902	9.33643	1	-0.136625	-0.026303	0.110322	1	0	0	1	1950
NM_001166552	Zbed6	chr1_135555462-135559463	TSS1007	23.5688	19.5278	17.5196	1	-0.271336	-0.427887	-0.156551	1	0	0	2	1300
NM_144873	Uhrf2	chr19_30103002-30107003	TSS10071	20.5028	25.0045	24.0236	1	0.286354	0.228621	-0.057733	1	0	0	1	1900
NM_031249	Cstf2t	chr19_31155330-31159331	TSS10073	14.4609	13.1404	13.3112	1	-0.138138	-0.119508	0.01863	1	0	0	1	2531
NR_033198	2700046G09Rik	chr19_32461705-32465706	TSS10075	0.139952	0.0331624	0.267633	1	-2.04472	0.930433	2.97516	1	0	0	1	3270
NM_010799	Minpp1	chr19_32558258-32562259	TSS10076	13.4665	13.586	12.2126	1	0.0127449	-0.140994	-0.153738	1	0	0	1	1800
NM_011864	Papss2	chr19_32692494-32696495	TSS10077	0.617918	0.59925	0.933723	1	-0.0441848	0.594791	0.638975	1	0	0	1	175
NM_008960	Pten	chr19_32830066-32834067	TSS10078	20.2879	24.103	21.8946	1	0.248582	0.10995	-0.138632	1	0	0	2	3551
NM_172842	Lax1	chr1_135584593-135588594	TSS1008	0.17584	0.0978733	0.0781085	2	-0.838791	-1.16054	-0.321749	1	0	0	2	675
NM_029682	Stambpl1	chr19_34264759-34268760	TSS10083	3.271	2.99889	5.03268	1	-0.125263	0.621441	0.746704	1	0	0	1	1125
NM_001146708	Fas	chr19_34363148-34367149	TSS10084	0.369991	0.463829	1.44757	2	0.325316	1.96518	1.63986	1	0	0	1	525
NM_008332	Ifit2	chr19_34623183-34627184	TSS10085	1.25035	1.3691	2.20305	1	0.130796	0.816672	0.685876	1	0	0	1	750
NM_183046	Kif20b	chr19_34994847-34998848	TSS10089	39.1456	32.5857	36.9744	1	-0.264604	-0.0823213	0.182282	1	0	0	2	1350
NM_001167949	Atp2b4	chr1_135648324-135652325	TSS1009	0.972984	1.05173	0.998877	4	0.112164	0.0378529	-0.0743112	0	0	0	0	0
NM_019428	Rpp30	chr19_36156205-36160206	TSS10090	29.6773	23.1644	25.0863	1	-0.357437	-0.242451	0.114986	1	0	0	1	1200
NM_172637	Hectd2	chr19_36627128-36631129	TSS10092	1.37244	1.33391	1.58063	2	-0.0410464	0.203621	0.244668	1	0	0	1	1700
NM_001163635	Tnks2	chr19_36906721-36910722	TSS10093	89.72	94.3228	99.8068	1	0.0721761	0.153707	0.0815307	1	0	0	2	2722
NM_001080706	Btaf1	chr19_36998568-37002569	TSS10094	16.0913	18.7176	13.687	1	0.218102	-0.233459	-0.451561	1	0	0	1	1300
NM_001164336	2016-03-06	chr19_37280034-37284035	TSS10095	41.1712	43.3804	44.6466	3	0.0754054	0.116912	0.041507	1	0	0	2	2485
NM_010615	Kif11	chr19_37448892-37452893	TSS10096	52.2914	49.2126	47.7199	1	-0.0875442	-0.13198	-0.0444358	1	0	0	3	2100
NM_008245	Hhex	chr19_37507330-37511331	TSS10097	3.64374	4.45799	6.11947	1	0.290901	0.747827	0.456925	2	3	570	2	2456
NM_175353	Exoc6	chr19_37622907-37626908	TSS10098	9.65714	8.31257	8.82154	1	-0.216277	-0.130551	0.0857259	1	0	0	1	1150
NM_001105201	Cyp26c1	chr19_37758169-37762170	TSS10099	0.0323862	0.0924525	0.0905403	1	1.48498	1.45516	-0.0298262	2	3	2395	3	1970
NM_009418	Tpp2	chr1_43988851-43992852	TSS101	32.9238	32.8119	33.92	1	-0.00491157	0.043004	0.0479156	1	0	0	1	1650
NM_001160422	Optc	chr1_135801750-135805751	TSS1010	1.60251e-06	0	0	4	-0.00231008	-0.00231008	0	1	0	0	2	776
NM_007811	Cyp26a1	chr19_37770297-37774298	TSS10100	0.2875	0.857019	0.261164	1	1.57244	-0.138102	-1.71054	2	2	2798	1	2300
NM_028293	Cep55	chr19_38127514-38131515	TSS10101	34.5099	23.2064	41.2266	6	-0.572466	0.256561	0.829028	1	0	0	5	2190
NM_181748	O3far1	chr19_38169568-38173569	TSS10102	0.310019	0.200273	0.306181	1	-0.627849	-0.0179137	0.609935	2	1	1975	1	1100
NM_175507	Tmem20	chr19_38468469-38472470	TSS10105	4.1803	4.68259	5.39216	1	0.163663	0.367179	0.203516	1	0	0	2	1700
NM_019588	Plce1	chr19_38596686-38600687	TSS10106	0.713858	0.926393	1.54711	1	0.375524	1.11478	0.739255	1	0	0	1	625
NM_145952	Tbc1d12	chr19_38909068-38913069	TSS10107	1.50163	1.79218	1.78975	1	0.255031	0.253074	-0.00195637	1	0	0	1	1500
NM_008234	Hells	chr19_39003479-39007480	TSS10108	123.249	123.69	121.656	1	0.00515288	-0.0187683	-0.0239212	1	0	0	4	2675
NM_001160420	Optc	chr1_135802576-135806577	TSS1011	0.0266035	0.106544	0	2	1.962	-4.78678	-6.74878	2	1	300	2	875
NM_009848	Entpd1	chr19_40732283-40736284	TSS10117	0	0.0144032	0.0394715	1	3.94516	5.33883	1.39368	1	0	0	1	525
NM_172839	Ccnj	chr19_40903768-40907769	TSS10118	4.17679	4.67165	3.32537	1	0.161501	-0.328791	-0.490292	1	0	0	1	1825
NM_028319	Zfp518a	chr19_40967194-40971195	TSS10119	20.9727	16.1224	13.2395	1	-0.379425	-0.663624	-0.284198	1	0	0	1	1600
NM_008043	Frat1	chr19_41902459-41906460	TSS10122	1.16044	1.42962	1.19187	1	0.300726	0.0385222	-0.262204	2	2	625	1	2635
NM_023418	Pgam1	chr19_41984360-41988361	TSS10123	187.456	238.137	185.836	1	0.345238	-0.0125219	-0.35776	1	0	0	1	2361
NM_023740	Zdhhc16	chr19_42005961-42009962	TSS10124	13.3979	16.488	15.7338	1	0.299389	0.231844	-0.0675451	1	0	0	1	2100
NM_145500	Ubtd1	chr19_42054252-42058253	TSS10125	6.07625	5.08721	11.1107	1	-0.25626	0.870589	1.12685	1	0	0	1	2450
NM_020033	Ankrd2	chr19_42108527-42112528	TSS10126	0.027966	0.0810496	0	1	1.50214	-4.85629	-6.35842	1	0	0	2	1123
NM_026152	Hoga1	chr19_42118340-42122341	TSS10127	0.459663	0.53011	0.499886	1	0.205299	0.120771	-0.0845284	1	0	0	1	675
NM_145501	Pi4k2a	chr19_42162924-42166925	TSS10129	13.8222	12.9543	14.6407	1	-0.0935492	0.0829914	0.176541	1	0	0	3	1825
NM_007570	Btg2	chr1_135973732-135977733	TSS1013	31.609	26.2757	34.0256	1	-0.266597	0.106282	0.372879	1	0	0	1	2375
NM_183195	Marveld1	chr19_42219878-42223879	TSS10130	5.92583	6.83927	6.98967	1	0.206793	0.23817	0.0313775	1	0	0	1	2225
NM_001164531	Zfyve27	chr19_42243056-42247057	TSS10131	5.77102	5.75567	5.83972	2	-0.00384179	0.0170699	0.0209117	1	0	0	1	1500
NM_027694	Golga7b	chr19_42328228-42332229	TSS10133	0.0979344	0.0641458	0.0880188	1	-0.6028	-0.152362	0.450438	2	1	725	1	550
NM_177464	D19Ertd386e	chr19_42591294-42595295	TSS10134	4.84911	4.19984	5.42336	1	-0.20734	0.161435	0.368775	1	0	0	2	1425
NM_031396	Cnnm1	chr19_43512925-43516926	TSS10135	0.518172	0.460733	0.4323	1	-0.169154	-0.260846	-0.0916926	1	0	0	1	1925
NM_008699	Nkx2-3	chr19_43684814-43688815	TSS10136	0.0467611	0.0596138	0.152819	1	0.34381	1.68733	1.34352	2	3	3376	3	1401
NM_053103	Entpd7	chr19_43762178-43766179	TSS10137	0.980451	0.888959	1.33857	1	-0.141177	0.448782	0.589959	1	0	0	1	1100
NM_025530	Cutc	chr19_43825512-43829513	TSS10138	7.08859	6.09295	7.8781	2	-0.218325	0.152329	0.370653	1	0	0	2	1250
NM_001039510	Adora1	chr1_136130008-136134009	TSS1014	0.145032	0.178593	0.211797	2	0.29845	0.543197	0.244747	2	2	3459	1	1625
NM_009128	Scd2	chr19_44366165-44370166	TSS10142	113.99	128.221	103.15	1	0.169724	-0.144162	-0.313886	1	0	0	1	3141
NM_176958	Hif1an	chr19_44635343-44639344	TSS10145	16.5315	17.0188	13.7156	1	0.0419092	-0.269382	-0.311291	1	0	0	1	1075
NM_011037	Pax2	chr19_44829883-44833884	TSS10146	0.0925745	0.0310416	0	1	-1.54617	-6.54804	-5.00187	2	2	3726	2	2592
NM_001081225	Fam178a	chr19_45003608-45007609	TSS10147	16.98	17.6014	16.2298	1	0.0518507	-0.0651873	-0.117038	1	0	0	2	1350
NM_011976	Sema4g	chr19_45061833-45065834	TSS10148	5.4088	4.39315	5.39906	1	-0.299991	-0.00259982	0.297391	2	1	50	1	1425
NM_153796	Peo1	chr19_45079047-45083048	TSS10149	12.6662	11.9744	8.21624	1	-0.0810238	-0.624372	-0.543348	1	0	0	1	2800
NM_145503	Lzts2	chr19_45087665-45091666	TSS10150	12.5293	8.16851	11.0263	2	-0.6171	-0.184341	0.432758	1	0	0	1	2291
NM_001130526	Lzts2	chr19_45090624-45094625	TSS10151	2.67266	5.28971	4.49405	1	0.984645	0.749521	-0.235124	1	0	0	1	2876
NM_053197	Sfxn3	chr19_45120065-45124066	TSS10152	3.17144	4.65429	6.78719	6	0.553279	1.09743	0.544154	1	0	0	1	2225
NM_178929	Kazald1	chr19_45148628-45152629	TSS10153	1.57237	0.867655	1.54664	1	-0.857003	-0.0237881	0.833215	2	1	1554	2	2625
NM_021901	Tlx1	chr19_45223204-45227205	TSS10154	0.246099	0.0871837	0.0209296	1	-1.48651	-3.49414	-2.00763	2	2	2905	1	1000
NM_001037758	Btrc	chr19_45436223-45440224	TSS10155	7.62638	7.13056	6.71169	2	-0.0969695	-0.184296	-0.0873267	1	0	0	1	1100
NM_172639	Dpcd	chr19_45633104-45637105	TSS10156	6.85524	6.43188	6.97131	1	-0.0919528	0.0242191	0.116172	1	0	0	1	1500
NM_176785	Hps6	chr19_46075967-46079968	TSS10157	1.57908	0.912515	1.47544	1	-0.790497	-0.0978749	0.692622	1	0	0	1	2418
NM_001081214	Pprc1	chr19_46129028-46133029	TSS10158	36.3089	39.6181	32.0581	1	0.125833	-0.179629	-0.305462	1	0	0	2	2404
NM_001039352	Nolc1	chr19_46148352-46152353	TSS10159	54.5959	74.7928	49.503	4	0.454098	-0.141274	-0.595372	1	0	0	3	2328
NM_020588	Tmem183a	chr1_136256576-136260577	TSS1016	34.7749	38.6385	39.3669	2	0.151985	0.178931	0.0269459	1	0	0	1	1825
NM_007703	Elovl3	chr19_46204388-46208389	TSS10160	0.0967655	0.0300086	0	1	-1.65666	-6.61125	-4.9546	2	3	489	1	575
NM_178930	Gbf1	chr19_46225047-46229048	TSS10161	11.8064	9.72528	13.5448	1	-0.279731	0.198154	0.477886	1	0	0	1	1525
NM_001177369	Nfkb2	chr19_46377226-46381227	TSS10162	10.9109	11.9509	12.987	3	0.131336	0.25127	0.119934	1	0	0	1	2550
NM_019408	Nfkb2	chr19_46378184-46382185	TSS10163	1.41095	0.883319	0.771401	1	-0.67505	-0.870267	-0.195217	1	0	0	1	2550
NM_001177370	Nfkb2	chr19_46378419-46382420	TSS10164	0.000490806	0	0	1	-0.576093	-0.576093	0	1	0	0	1	2431
NM_133694	Fbxl15	chr19_46400673-46404674	TSS10165	1.42906	0.693483	0.885392	1	-1.04206	-0.690059	0.352005	1	0	0	1	3175
NM_029186	Tmem180	chr19_46429369-46433370	TSS10167	30.6364	35.3058	27.3414	1	0.204652	-0.164154	-0.368806	1	0	0	1	2495
NM_015752	Sufu	chr19_46469407-46473408	TSS10168	5.84666	6.81128	6.07526	2	0.220278	0.0553242	-0.164954	1	0	0	3	2343
NM_053100	Trim8	chr19_46574137-46578138	TSS10169	14.0886	12.6925	18.1371	1	-0.150541	0.364393	0.514933	1	0	0	1	4001
NM_053196	Sfxn2	chr19_46645854-46649855	TSS10170	3.38451	3.62882	2.75627	1	0.100525	-0.296133	-0.396657	1	0	0	2	1975
NM_146099	D19Wsu162e	chr19_46671595-46675596	TSS10171	8.08844	9.65454	10.0196	2	0.255317	0.30886	0.0535429	1	0	0	1	1275
NM_001177813	D19Wsu162e	chr19_46695890-46699891	TSS10172	2.24601	0.493429	1.21745	1	-2.18417	-0.882959	1.30121	1	0	0	1	150
NM_025563	2010012O05Rik	chr19_46762395-46766396	TSS10173	2.90854	2.34295	2.12336	1	-0.311849	-0.453763	-0.141914	1	0	0	1	850
NM_020577	As3mt	chr19_46779932-46783933	TSS10174	3.0039	3.23455	3.04453	1	0.106694	0.0193763	-0.0873177	1	0	0	1	1125
NM_033569	Cnnm2	chr19_46834098-46838099	TSS10175	6.58932	5.89784	7.50116	2	-0.159917	0.186958	0.346875	1	0	0	1	2750
NM_146100	Ina	chr19_47087187-47091188	TSS10176	20.1352	28.9595	11.9718	1	0.524295	-0.750031	-1.27433	2	1	225	1	3425
NM_177342	Taf5	chr19_47140237-47144238	TSS10177	10.7775	11.0823	11.3985	1	0.0402311	0.0808141	0.040583	1	0	0	3	1650
NM_011053	Pdcd11	chr19_47163255-47167256	TSS10178	28.2008	31.8413	26.2213	1	0.175157	-0.104993	-0.28015	1	0	0	1	1800
NM_021360	Neurl1a	chr19_47251309-47255310	TSS10179	0.5282	0.533768	0.529593	1	0.0151001	0.00379258	-0.0113075	1	0	0	1	2450
NM_001081307	Ppp1r12b	chr1_136850517-136854518	TSS1018	1.08077	0.799363	0.94777	1	-0.434667	-0.189263	0.245404	1	0	0	1	900
NM_001163480	Neurl1a	chr19_47301332-47305333	TSS10180	3.16018	3.22139	3.05168	1	0.0276679	-0.0503868	-0.0780547	1	0	0	1	425
NM_001164639	Slk	chr19_47652508-47656509	TSS10181	21.0208	22.1206	21.2572	2	0.0735728	0.0161339	-0.0574389	1	0	0	1	2275
NM_026377	Sfr1	chr19_47804245-47808246	TSS10182	124.642	121.673	108.718	1	-0.0347809	-0.197198	-0.162417	1	0	0	1	1475
NM_010362	Gsto1	chr19_47927478-47931479	TSS10183	21.2866	21.5787	21.7655	1	0.0196615	0.0320961	0.0124346	1	0	0	1	1300
NM_026619	Gsto2	chr19_47938283-47942284	TSS10184	1.17221	0.233068	0.484771	1	-2.32546	-1.27211	1.05335	1	0	0	1	500
NM_001163267	Ccdc147	chr19_48010201-48014202	TSS10185	0	0	0	1	0	0	0	1	0	0	1	325
NM_025696	Sorcs3	chr19_48278514-48282515	TSS10186	0.00917656	0	0	1	-3.34718	-3.34718	0	2	4	2740	2	2100
NR_030678	AA387883	chr19_52995670-52999671	TSS10188	0	0	0	1	0	0	0	1	0	0	1	200
NM_001164101	Add3	chr19_53212934-53216935	TSS10189	0	0	0.125405	2	0	6.98191	6.98191	1	0	0	2	1360
NM_001164100	Add3	chr19_53215245-53219246	TSS10190	23.2044	29.3678	20.8173	3	0.339822	-0.156605	-0.496427	1	0	0	2	2405
NM_013758	Add3	chr19_53216486-53220487	TSS10191	5.61923	1.29479	3.72837	1	-2.1168	-0.591697	1.5251	1	0	0	1	1814
NM_001008542	Mxi1	chr19_53382995-53386996	TSS10192	1.22552	1.2117	0.986225	1	-0.0163481	-0.31312	-0.296772	2	1	896	1	2246
NM_010847	Mxi1	chr19_53401902-53405903	TSS10193	8.85106	9.0987	7.97219	1	0.0398058	-0.150856	-0.190662	1	0	0	1	1425
NM_001008543	Mxi1	chr19_53402935-53406936	TSS10194	0.0870945	0	0	1	-6.46098	-6.46098	0	1	0	0	1	1425
NM_001085390	Dusp5	chr19_53601807-53605808	TSS10195	8.60172	9.20691	6.11996	1	0.0980809	-0.491035	-0.589116	1	0	0	1	2725
NM_007790	Smc3	chr19_53672885-53676886	TSS10196	80.9977	87.3871	82.3744	1	0.109538	0.0243148	-0.0852233	1	0	0	1	1500
NM_001170847	Rbm20	chr19_53749795-53753796	TSS10197	0.925757	0.746518	1.28526	1	-0.310083	0.472919	0.783002	2	1	2525	1	1550
NM_001168492	Pdcd4	chr19_53975840-53979841	TSS10198	0	0	0	2	0	0	0	1	0	0	1	1725
NM_001168491	Pdcd4	chr19_53975840-53979841	TSS10199	27.2864	27.5318	32.0244	2	0.0129152	0.230981	0.218065	1	0	0	1	1725
NM_144558	Bivm	chr1_44174812-44178813	TSS102	5.67626	5.24203	7.05501	1	-0.114794	0.313658	0.428452	1	0	0	1	2225
NM_001033409	Lgr6	chr1_136999853-137003854	TSS1020	1.0701	0.561869	0.782468	1	-0.928222	-0.451147	0.477075	2	2	950	1	1450
NM_001168505	Shoc2	chr19_54016795-54020796	TSS10200	15.7252	12.9084	15.4263	1	-0.284748	-0.0276845	0.257064	1	0	0	1	2550
NM_019658	Shoc2	chr19_54017365-54021366	TSS10201	2.46969	4.46499	2.81626	1	0.854066	0.189379	-0.664687	1	0	0	1	2550
NM_007417	Adra2a	chr19_54117671-54121672	TSS10202	0.318497	0.324212	0.19348	1	0.0255781	-0.716181	-0.741759	2	1	1975	1	2622
NM_027976	Acsl5	chr19_55325858-55329859	TSS10204	3.15472	3.09911	3.85391	1	-0.0256498	0.288728	0.314378	1	0	0	1	1600
NM_016862	Vti1a	chr19_55388840-55392841	TSS10205	4.44232	3.88204	4.16727	1	-0.194451	-0.0921893	0.102262	1	0	0	1	1600
NM_001142923	Tcf7l2	chr19_55814299-55818300	TSS10206	3.30569	3.74757	3.07841	12	0.180951	-0.102736	-0.283687	1	0	0	1	2600
NM_001142924	Tcf7l2	chr19_55967810-55971811	TSS10207	0	0	0	2	0	0	0	1	0	0	1	375
NM_007611	Casp7	chr19_56469618-56473619	TSS10209	3.39235	2.43724	3.60798	1	-0.47687	0.0888809	0.565751	2	1	150	1	1350
NM_007955	Ptprv	chr1_137027152-137031153	TSS1021	1.06526	0.586964	0.791202	1	-0.85876	-0.428619	0.430141	1	0	0	2	600
NM_025811	Nhlrc2	chr19_56620750-56624751	TSS10211	10.1123	9.06414	8.36334	1	-0.157853	-0.27393	-0.116078	1	0	0	1	2125
NM_007419	Adrb1	chr19_56794861-56798862	TSS10212	0.317462	0.448113	0.504848	1	0.495957	0.667583	0.171625	2	3	3176	1	2850
NM_031387	Tdrd1	chr19_56898775-56902776	TSS10213	0.886265	1.01429	1.02853	3	0.194461	0.214543	0.0200819	2	3	550	1	575
NM_172840	Vwa2	chr19_56946905-56950906	TSS10215	0.80938	0.716206	0.603117	1	-0.176211	-0.423771	-0.24756	2	2	1606	1	1200
NM_145505	Fam160b1	chr19_57433498-57437499	TSS10216	10.8798	8.40598	11.3117	1	-0.372125	0.0561587	0.428284	1	0	0	3	3151
NM_028115	Trub1	chr19_57525395-57529396	TSS10217	13.7359	12.8535	14.6128	4	-0.0957928	0.0892667	0.18506	1	0	0	1	825
NM_181415	Atrnl1	chr19_57683523-57687524	TSS10218	3.91144	3.5693	4.57799	1	-0.132023	0.226961	0.358984	1	0	0	1	2300
NM_029372	1700011F14Rik	chr19_58584491-58588492	TSS10219	0.150298	0.134325	0	1	-0.160965	-7.24125	-7.08028	1	0	0	1	650
NM_134438	Gpr37l1	chr1_137062258-137066259	TSS1022	0	0.0935246	0.114372	1	6.56262	6.85015	0.287531	1	0	0	1	275
NM_178689	Eno4	chr19_59015914-59019915	TSS10223	0.440442	0.348816	0.535303	1	-0.335628	0.280824	0.616452	1	0	0	2	1800
NM_207261	Kcnk18	chr19_59292137-59296138	TSS10224	0	0	0.0131125	1	0	3.8189	3.8189	1	0	0	1	500
NM_172523	Slc18a2	chr19_59333367-59337368	TSS10225	0.281343	0.461386	0.378371	1	0.711649	0.426161	-0.285488	1	0	0	1	1100
NM_010132	Emx2	chr19_59531179-59535180	TSS10226	0.420396	0.417317	1.59521	1	-0.01058	1.9214	1.93198	2	2	3321	1	2100
NM_178421	Nanos1	chr19_60829889-60833890	TSS10228	1.474	1.70414	1.69794	1	0.209175	0.20392	-0.00525529	1	0	0	1	2000
NM_001167829	Fam45a	chr19_60885472-60889473	TSS10229	9.04177	7.90643	8.56583	2	-0.193555	-0.0780023	0.115553	1	0	0	1	1250
NM_001163131	Elf3	chr1_137153049-137157050	TSS1023	10.5511	14.2206	11.6845	2	0.430551	0.147179	-0.283372	1	0	0	1	2751
NM_018869	Grk5	chr19_60963651-60967652	TSS10230	1.01084	1.0336	1.13745	1	0.0320919	0.17009	0.137998	1	0	0	1	1725
NM_009212	Ighmbp2	chr19_3281010-3285011	TSS10231	3.14493	3.39	3.3004	1	0.108224	0.0695914	-0.0386328	1	0	0	1	2050
NM_010253	Gal	chr19_3412457-3416458	TSS10232	0.144373	0.341479	0.577495	1	1.23626	1.99255	0.756289	1	0	0	1	825
NM_001164159	Ppp6r3	chr19_3573749-3577750	TSS10233	60.4521	62.2358	52.3681	7	0.0419517	-0.207101	-0.249053	1	0	0	1	2275
NM_008513	Lrp5	chr19_3684564-3688565	TSS10234	15.2443	20.2016	21.4097	1	0.406176	0.489967	0.083791	1	0	0	3	2375
NM_016921	Tcirg1	chr19_3903230-3907231	TSS10235	0.830514	0.686935	0.376345	1	-0.273468	-1.13986	-0.866388	1	0	0	2	2451
NM_001167784	Tcirg1	chr19_3904983-3908984	TSS10236	0.320745	0.240599	0.487769	1	-0.413303	0.603235	1.01654	1	0	0	1	1275
NM_001136091	Tcirg1	chr19_3905133-3909134	TSS10237	5.30017	4.24915	7.23539	1	-0.318797	0.448959	0.767756	1	0	0	1	1275
NM_144870	Ndufs8	chr19_3910717-3914718	TSS10238	18.5831	19.5809	25.1874	1	0.0754519	0.438691	0.363239	1	0	0	1	2250
NM_026316	Aldh3b1	chr19_3927716-3931717	TSS10239	1.05749	1.03921	1.48372	1	-0.0251328	0.488183	0.513316	1	0	0	2	1275
NM_001159624	Rnpep	chr1_137178661-137182662	TSS1024	5.53245	6.85737	8.81234	2	0.309687	0.67151	0.361823	1	0	0	2	1314
NM_133666	Ndufv1	chr19_4010725-4014726	TSS10240	67.4576	68.0959	76.7041	1	0.0135867	0.18532	0.171733	1	0	0	1	1725
NM_013541	Gstp1	chr19_4035912-4039913	TSS10241	70.7424	66.2791	51.3436	1	-0.0940198	-0.462383	-0.368363	1	0	0	2	1250
NM_181796	Gstp2	chr19_4040221-4044222	TSS10242	57.502	45.3251	37.5343	1	-0.343295	-0.615389	-0.272094	1	0	0	2	1050
NM_144869	BC021614	chr19_4057294-4061295	TSS10243	2.166	1.79552	3.07605	1	-0.270494	0.505849	0.776343	1	0	0	2	1175
NM_016666	Aip	chr19_4123827-4127828	TSS10244	22.2074	24.8358	26.4902	1	0.161374	0.254408	0.0930339	1	0	0	1	1900
NM_021485	Rps6kb2	chr19_4161245-4165246	TSS10246	3.54072	3.94988	4.69536	1	0.157724	0.407093	0.249369	1	0	0	1	1325
NM_134148	Carns1	chr19_4173479-4177480	TSS10247	0.60785	0.344171	0.412168	1	-0.818776	-0.559358	0.259417	1	0	0	1	675
NM_178650	Tbc1d10c	chr19_4189047-4193048	TSS10248	0.466407	0.333769	0.38405	1	-0.481513	-0.279634	0.20188	1	0	0	3	1598
NM_011237	Rad9	chr19_4199603-4203604	TSS10249	19.443	19.7269	22.2381	1	0.0209124	0.193773	0.172861	1	0	0	1	2350
NM_011590	Timm17a	chr1_137208314-137212315	TSS1025	70.8476	72.5533	62.6138	1	0.0343218	-0.178236	-0.212557	1	0	0	2	1750
NM_198113	Ssh3	chr19_4267172-4271173	TSS10250	1.92135	1.73858	2.592	1	-0.144132	0.431751	0.575883	1	0	0	2	1050
NM_026720	Ankrd13d	chr19_4281137-4285138	TSS10251	3.78985	3.00684	3.01744	1	-0.333794	-0.328718	0.0050753	1	0	0	1	1425
NM_130863	Adrbk1	chr19_4303955-4307956	TSS10252	21.561	22.4725	22.3611	1	0.0597338	0.0525647	-0.00716915	1	0	0	1	1650
NM_001001984	Kdm2a	chr19_4395077-4399078	TSS10253	13.5634	13.4113	12.7189	1	-0.0162686	-0.0927379	-0.0764693	1	0	0	2	3075
NM_007485	Rhod	chr19_4437424-4441425	TSS10254	4.25811	3.25811	4.61669	1	-0.386074	0.116619	0.502693	1	0	0	2	1700
NM_134164	Syt12	chr19_4475143-4479144	TSS10255	1.06727	0.94389	1.08944	1	-0.177058	0.0296341	0.206692	2	3	2032	2	1275
NM_153388	Lrfn4	chr19_4613667-4617668	TSS10257	9.0005	12.4895	10.7165	1	0.472594	0.251731	-0.220863	1	0	0	1	2708
NM_023131	Rce1	chr19_4623617-4627618	TSS10258	13.0614	11.4681	14.7826	1	-0.187668	0.178578	0.366245	1	0	0	1	2500
NM_009032	Rbm4	chr19_4791877-4795878	TSS10259	8.52877	9.59276	6.08781	1	0.16959	-0.486347	-0.655936	1	0	0	2	2098
NM_175259	Shisa4	chr1_137269640-137273641	TSS1026	3.36535	3.40057	3.65018	1	0.0150156	0.117178	0.102162	1	0	0	1	1275
NM_019869	Rbm14	chr19_4809634-4813635	TSS10260	47.9824	45.538	44.1185	1	-0.0754328	-0.121119	-0.0456862	1	0	0	1	2825
NM_016892	Ccs	chr19_4837322-4841323	TSS10261	23.5895	24.2698	25.1069	1	0.0410157	0.0899354	0.0489197	1	0	0	1	1800
NM_013456	Actn3	chr19_4875884-4879885	TSS10262	3.55956	8.18313	3.54792	1	1.20072	-0.00472411	-1.20545	1	0	0	2	3150
NM_001033128	Bbs1	chr19_4904627-4908628	TSS10263	1.12534	0.652148	0.724163	1	-0.786161	-0.635265	0.150895	1	0	0	1	700
NM_133803	Dpp3	chr19_4926287-4930288	TSS10264	43.7767	58.4701	46.507	1	0.417528	0.0872827	-0.330245	1	0	0	1	1925
NM_172835	Peli3	chr19_4941092-4945093	TSS10265	1.14125	0.975784	1.11698	1	-0.225767	-0.0309841	0.194783	2	1	50	1	1350
NM_153553	Npas4	chr19_4987971-4991972	TSS10266	0.414486	0.581669	0.0877791	1	0.487877	-2.22651	-2.71438	2	2	1800	2	1150
NM_001001885	Tmem151a	chr19_5083477-5087478	TSS10267	0.977806	0.772485	1.32088	1	-0.33965	0.433496	0.773146	2	3	1325	1	1350
NM_009920	Cnih2	chr19_5096418-5100419	TSS10268	4.98412	4.52474	3.13899	1	-0.139475	-0.666868	-0.527394	1	0	0	1	1050
NM_029576	Rab1b	chr19_5104996-5108997	TSS10269	32.7661	32.9125	33.9234	1	0.00643145	0.0500753	0.0436438	1	0	0	1	1450
NM_153774	Ipo9	chr1_137325068-137329069	TSS1027	27.9519	28.1684	28.0193	1	0.0111309	0.00347444	-0.00765643	1	0	0	1	1300
NM_008451	Klc2	chr19_5116408-5120409	TSS10270	10.4878	10.3736	9.32598	1	-0.0157939	-0.169368	-0.153574	1	0	0	1	1975
NM_153129	Pacs1	chr19_5271119-5275120	TSS10271	6.43467	6.01373	6.24726	1	-0.0975904	-0.0426359	0.0549545	1	0	0	1	1675
NM_030109	Sf3b2	chr19_5293455-5297456	TSS10272	95.4532	104.042	91.6696	1	0.124299	-0.0583496	-0.182649	1	0	0	2	2075
NM_028623	Cst6	chr19_5347574-5351575	TSS10273	0.181158	0.100175	0.165908	1	-0.848338	-0.126137	0.7222	1	0	0	1	600
NM_001038231	Banf1	chr19_5364347-5368348	TSS10274	15.8915	15.5739	19.7054	1	-0.0291232	0.310318	0.339441	1	0	0	1	3523
NM_011793	Banf1	chr19_5364645-5368646	TSS10275	112.958	146.91	157.259	1	0.379143	0.477353	0.0982093	1	0	0	1	3821
NM_016882	Sart1	chr19_5386703-5390704	TSS10276	28.142	31.9897	21.6595	1	0.184876	-0.37771	-0.562586	1	0	0	1	3029
NM_024176	Drap1	chr19_5422916-5426917	TSS10277	79.3574	72.4584	80.3835	1	-0.13121	0.0185344	0.149744	1	0	0	1	3417
NM_198616	Ccdc85b	chr19_5455563-5459564	TSS10278	5.13243	4.81063	5.83104	1	-0.0933974	0.184078	0.277475	1	0	0	2	2212
NM_009985	Ctsw	chr19_5466498-5470499	TSS10279	0.237836	0.373314	1.00819	1	0.648229	2.07911	1.43088	1	0	0	2	300
NM_173437	Nav1	chr1_137479932-137483933	TSS1028	5.65288	5.05759	4.16468	1	-0.160506	-0.440689	-0.280183	2	1	1325	2	2493
NM_027877	Mus81	chr19_5486336-5490337	TSS10280	5.06113	4.39805	4.83385	1	-0.202553	-0.0662734	0.136279	1	0	0	2	2762
NM_001024560	Snx32	chr19_5508489-5512490	TSS10281	0.84914	0.717555	0.659065	1	-0.242602	-0.365092	-0.12249	1	0	0	1	1650
NM_023781	1700020D05Rik	chr19_5501787-5505788	TSS10282	0.230468	0.183201	0.264473	1	-0.329532	0.197752	0.527284	1	0	0	1	400
NM_019935	Ovol1	chr19_5558575-5562576	TSS10283	0.23497	0.279316	0.26847	1	0.248451	0.191521	-0.0569294	2	2	3425	1	2175
NM_178637	Kat5	chr19_5608094-5612095	TSS10284	14.6503	16.7733	14.9032	1	0.195224	0.0246903	-0.170534	1	0	0	1	2175
NM_001164481	Sipa1	chr19_5661707-5665708	TSS10285	7.84572	6.79359	7.66822	5	-0.207704	-0.0330105	0.174693	1	0	0	2	1358
NM_144868	Pcnxl3	chr19_5686908-5690909	TSS10286	11.4698	9.92468	11.3818	1	-0.208728	-0.0111105	0.197618	1	0	0	1	3450
NM_001114595	Ehbp1l1	chr19_5724317-5728318	TSS10287	3.2538	3.19095	3.87297	4	-0.0281326	0.251241	0.279373	1	0	0	2	1475
NM_181452	Fam89b	chr19_5727666-5731667	TSS10288	8.43078	9.66793	9.53364	2	0.197519	0.177341	-0.0201778	1	0	0	3	3051
NM_020491	Sssca1	chr19_5729721-5733722	TSS10289	23.9656	27.4523	15.9549	1	0.195954	-0.586935	-0.78289	1	0	0	2	2204
NM_019645	Pkp1	chr1_137813601-137817602	TSS1029	0.0115813	0.0683329	0	1	2.46226	-3.65321	-6.11547	2	2	2849	1	1175
NM_023912	Scyl1	chr19_5769401-5773402	TSS10290	12.6559	14.2575	13.3928	1	0.171898	0.0816412	-0.0902569	1	0	0	1	1675
NR_002847	Malat1	chr19_5800671-5804672	TSS10291	233.343	178.276	215.801	1	-0.388338	-0.11275	0.275588	1	0	0	4	2879
NR_003513	Neat1	chr19_5843478-5847479	TSS10292	29.6882	21.8049	22.9523	1	-0.44522	-0.371237	0.073983	1	0	0	2	3676
NM_026169	Frmd8	chr19_5873208-5877209	TSS10293	13.8842	14.3154	15.7126	1	0.0441208	0.178466	0.134345	1	0	0	1	1200
NM_198634	Tigd3	chr19_5892107-5896108	TSS10294	2.76931	4.07717	2.67554	1	0.557874	-0.0496782	-0.607553	1	0	0	1	1700
NM_011262	Dpf2	chr19_5910866-5914867	TSS10295	25.9045	26.3442	30.7362	1	0.0242817	0.246727	0.222446	1	0	0	1	1975
NM_026772	Cdc42ep2	chr19_5922816-5926817	TSS10296	1.02024	0.644238	1.04584	1	-0.662419	0.035719	0.698138	1	0	0	1	1300
NM_001164057	Pola2	chr19_5962206-5966207	TSS10297	30.4527	33.0815	31.0322	2	0.119451	0.0271949	-0.0922558	1	0	0	1	2175
NM_198650	Slc22a20	chr19_5984143-5988144	TSS10298	0.0929	0.0298647	0.0372189	1	-1.60517	-1.29684	0.308328	1	0	0	1	250
NM_007600	Capn1	chr19_6013247-6017248	TSS10299	3.29901	2.51153	3.74032	1	-0.39333	0.181077	0.574407	1	0	0	1	2050
NM_011729	Ercc5	chr1_44202588-44206589	TSS103	11.3364	9.39343	13.019	1	-0.271212	0.19964	0.470852	1	0	0	1	1575
NM_028872	5730559C18Rik	chr1_138128857-138132858	TSS1030	3.4603	4.49379	4.25828	1	0.37694	0.299296	-0.0776441	1	0	0	1	2568
NM_001110504	Capn1	chr19_6013825-6017826	TSS10300	12.6942	13.4542	13.4779	1	0.0838807	0.0864196	0.00253893	1	0	0	1	2050
NM_026246	Mrpl49	chr19_6055751-6059752	TSS10301	33.0148	33.8621	31.8759	1	0.0365574	-0.0506453	-0.0872027	1	0	0	1	2775
NM_028454	Tm7sf2	chr19_6065850-6069851	TSS10302	7.03207	11.1521	8.6834	1	0.665218	0.304272	-0.360947	1	0	0	1	1650
NM_001081041	1110014N23Rik	chr19_6075187-6079188	TSS10303	8.51793	8.58764	9.13823	3	0.0117568	0.1014	0.0896436	1	0	0	1	1275
NM_024231	Zfpl1	chr19_6082891-6086892	TSS10304	16.3283	13.151	17.4269	1	-0.312181	0.0939358	0.406117	1	0	0	1	2650
NM_133678	Sac3d1	chr19_6116586-6120587	TSS10305	6.80492	7.34311	6.0838	1	0.109797	-0.16158	-0.271378	1	0	0	1	2125
NM_026912	Snx15	chr19_6126215-6130216	TSS10306	3.36988	3.67462	5.10114	1	0.124862	0.597977	0.473115	1	0	0	1	900
NM_019722	Arl2	chr19_6139137-6143138	TSS10307	27.2558	25.8481	29.6884	1	-0.0765021	0.123332	0.199834	1	0	0	1	1575
NM_198168	Ppp2r5b	chr19_6233840-6237841	TSS10308	5.10046	4.78527	6.27953	1	-0.0920084	0.299976	0.391985	1	0	0	1	1825
NM_001101516	Gpr25	chr1_138155450-138159451	TSS1031	0.272428	0.113696	0.318017	1	-1.25335	0.222472	1.47582	2	1	1475	1	1475
NM_019924	Rps6ka4	chr19_6913091-6917092	TSS10310	4.78874	4.49968	6.17992	1	-0.0898044	0.367874	0.457679	2	1	350	1	1650
NM_001081291	Ccdc88b	chr19_6930701-6934702	TSS10311	1.04378	0.82595	0.865596	1	-0.337327	-0.269768	0.0675595	1	0	0	1	74
NM_012021	Prdx5	chr19_6982135-6986136	TSS10312	45.4921	47.6203	54.895	1	0.0659593	0.271053	0.205094	1	0	0	1	3086
NM_007953	Esrra	chr19_6994298-6998299	TSS10313	6.72078	9.65813	9.935	1	0.52305	0.563822	0.0407719	1	0	0	1	2425
NM_001039494	1700019N12Rik	chr19_6997870-7001871	TSS10314	0.834073	2.43964	0.966936	1	1.54729	0.213009	-1.33428	1	0	0	1	1875
NM_008431	Kcnk4	chr19_7007005-7011006	TSS10315	0.205994	0.254971	0.241605	1	0.306391	0.22902	-0.0773711	2	2	1925	1	1425
NM_207220	Gpr137	chr19_7013683-7017684	TSS10316	4.16322	5.61456	6.6093	3	0.431384	0.666669	0.235286	1	0	0	1	2600
NM_001177362	Gpr137	chr19_7013997-7017998	TSS10317	1.86287	1.81239	1.39103	3	-0.0396143	-0.421114	-0.3815	1	0	0	1	2600
NM_001177361	Gpr137	chr19_7014940-7018941	TSS10318	0.850941	0	0.955113	2	-9.73461	0.166428	9.90104	1	0	0	1	2600
NM_008874	Plcb3	chr19_7042242-7046243	TSS10319	25.3877	25.0099	21.5611	1	-0.0216296	-0.235689	-0.214059	1	0	0	2	3093
NM_001081360	Camsap2	chr1_138240681-138244682	TSS1032	6.81991	6.12883	5.68402	1	-0.154117	-0.262799	-0.108682	1	0	0	1	1600
NM_008020	Fkbp2	chr19_7052930-7056931	TSS10320	17.2072	20.6225	16.5499	2	0.261194	-0.0561849	-0.317379	1	0	0	1	2150
NM_011697	Vegfb	chr19_7060141-7064142	TSS10321	22.0187	25.3322	20.671	2	0.202235	-0.0911134	-0.293349	1	0	0	2	1559
NM_020566	Dnajc4	chr19_7064762-7068763	TSS10322	5.89965	6.00256	8.41301	1	0.0249444	0.51192	0.486975	1	0	0	1	1600
NM_026675	Nudt22	chr19_7068527-7072528	TSS10323	4.20873	3.31448	3.58469	1	-0.34451	-0.231477	0.113033	1	0	0	1	1700
NM_016737	Stip1	chr19_7112516-7116517	TSS10325	199.733	262.343	166.574	1	0.39338	-0.261908	-0.655288	1	0	0	2	2300
NM_201411	Flrt1	chr19_7178219-7182220	TSS10326	0.31678	0.264166	0.0465593	1	-0.261133	-2.74023	-2.4791	1	0	0	1	756
NM_134150	Otub1	chr19_7278774-7282775	TSS10327	38.2958	42.4757	39.6778	1	0.149448	0.0511445	-0.0983033	1	0	0	1	2225
NM_007750	Cox8a	chr19_7290106-7294107	TSS10328	308.864	334.437	395.105	1	0.114762	0.355263	0.240501	1	0	0	1	2200
NM_027643	Naa40	chr19_7313712-7317713	TSS10329	14.9577	13.5639	12.7535	1	-0.141106	-0.229978	-0.0888721	1	0	0	1	1850
NR_024328	9230116N13Rik	chr1_138310096-138314097	TSS1033	0.195797	0.0606319	0.177186	1	-1.67496	-0.143324	1.53163	1	0	0	3	1800
NM_001080390	Mark2	chr19_7367927-7371928	TSS10330	9.08866	7.44816	6.68691	4	-0.287149	-0.442671	-0.155521	1	0	0	2	1075
NM_001080388	Mark2	chr19_7414334-7418335	TSS10331	4.0743	6.59768	4.47072	3	0.69527	0.133923	-0.561347	1	0	0	1	2541
NM_001167831	AI846148	chr19_7455516-7459517	TSS10332	11.0359	9.46753	8.63191	2	-0.221124	-0.354417	-0.133294	1	0	0	2	2950
NM_001003933	Rtn3	chr19_7555779-7559780	TSS10333	31.0459	28.9194	31.4217	3	-0.102364	0.0173588	0.119723	1	0	0	1	1750
NM_019516	Lgals12	chr19_7679666-7683667	TSS10334	0.353754	0.209521	0.194646	1	-0.752855	-0.858573	-0.105719	1	0	0	2	825
NM_001159769	Nr5a2	chr1_138848207-138852208	TSS1034	9.37557	11.0634	7.64731	1	0.238793	-0.293919	-0.532712	1	0	0	1	2818
NM_008577	Slc3a2	chr19_8786387-8790388	TSS10341	122.956	135.153	173.29	1	0.13645	0.495043	0.358593	1	0	0	2	2988
NM_001161413	Slc3a2	chr19_8795859-8799860	TSS10342	1.67845	1.05964	2.65501	1	-0.663054	0.661272	1.32433	1	0	0	4	2610
NM_026325	Tmem179b	chr19_8846957-8850958	TSS10343	10.3813	8.45744	10.0023	3	-0.295663	-0.0536556	0.242008	1	0	0	2	1875
NM_001177798	Taf6l	chr19_8858907-8862908	TSS10344	1.44066	1.04142	0.547506	9	-0.467791	-1.39415	-0.926363	1	0	0	2	1400
NM_146092	Taf6l	chr19_8858806-8862807	TSS10345	5.69998	7.00742	6.58625	1	0.297879	0.208466	-0.0894129	1	0	0	2	1400
NM_026329	Polr2g	chr19_8871047-8875048	TSS10346	72.7327	67.8398	84.5486	1	-0.100471	0.217174	0.317645	1	0	0	1	1075
NM_027412	Ttc9c	chr19_8891784-8895785	TSS10347	26.6235	24.7057	27.5093	1	-0.107852	0.0472174	0.15507	1	0	0	2	3235
NM_010316	Gng3	chr19_8911736-8915737	TSS10348	6.01004	5.3379	5.97224	1	-0.171072	-0.00910093	0.161971	1	0	0	1	4001
NM_001160356	AI462493	chr19_8953423-8957424	TSS10349	10.7728	14.6723	12.0745	1	0.445666	0.164556	-0.28111	1	0	0	2	1000
NM_030676	Nr5a2	chr1_138855025-138859026	TSS1035	0	0	0	1	0	0	0	1	0	0	1	525
NR_027866	5730408K05Rik	chr19_8961260-8965261	TSS10350	16.2464	19.9649	13.1833	1	0.297329	-0.301388	-0.598717	1	0	0	1	2850
NM_009073	Rom1	chr19_9001846-9005847	TSS10351	0.911701	0.536057	0.863102	1	-0.765067	-0.0789407	0.686126	1	0	0	1	2075
NM_025610	Asrgl1	chr19_9208056-9212057	TSS10353	11.7344	15.7768	15.904	1	0.427029	0.438613	0.0115843	1	0	0	1	1125
NM_016692	Incenp	chr19_9972023-9976024	TSS10354	58.9339	64.5801	45.4603	1	0.13199	-0.374483	-0.506473	1	0	0	1	2250
NM_019699	Fads2	chr19_10173993-10177994	TSS10356	36.6544	42.5092	24.5529	1	0.213783	-0.578074	-0.791857	1	0	0	1	2450
NM_007999	Fen1	chr19_10276433-10280434	TSS10357	32.9103	40.9129	26.4848	1	0.314008	-0.313364	-0.627372	1	0	0	1	2175
NM_001033481	Gm98	chr19_10313238-10317239	TSS10358	7.97327	8.64235	8.57564	1	0.116238	0.10506	-0.011178	1	0	0	1	2087
NM_198114	Dagla	chr19_10377367-10381368	TSS10359	0.603294	0.738491	0.945998	1	0.291282	0.648111	0.356829	1	0	0	1	1125
NM_001111140	Lrrc10b	chr19_10529937-10533938	TSS10360	0.114695	0	0.13583	1	-6.85418	0.242058	7.09624	2	2	2613	1	1800
NM_025333	Sdhaf2	chr19_10597699-10601700	TSS10362	5.26938	5.22527	5.52794	1	-0.0121253	0.0690959	0.0812213	1	0	0	1	1475
NM_026798	Tmem216	chr19_10628728-10632729	TSS10363	4.81747	3.54743	3.86106	1	-0.441394	-0.319205	0.12219	1	0	0	1	1350
NM_028411	Tmem138	chr19_10649587-10653588	TSS10364	12.5444	8.1928	12.6104	1	-0.614554	0.00756997	0.622124	1	0	0	1	1700
NM_145496	Dak	chr19_10676748-10680749	TSS10365	12.5076	9.80595	12.9166	1	-0.351044	0.0464177	0.397462	1	0	0	3	2924
NM_021453	Pga5	chr19_10750561-10754562	TSS10366	0.489544	0.852243	1.00048	1	0.798574	1.02968	0.231105	1	0	0	2	225
NM_007650	Cd5	chr19_10811464-10815465	TSS10367	0	0	0	1	0	0	0	1	0	0	1	190
NM_133804	Tmem132a	chr19_10942269-10946270	TSS10369	9.3074	11.5383	10.3837	1	0.309951	0.157854	-0.152096	1	0	0	1	1775
NM_021605	Nek7	chr1_140514273-140518274	TSS1037	16.5093	14.0239	16.024	1	-0.235376	-0.043042	0.192334	1	0	0	2	1952
NM_134142	Tmem109	chr19_10954233-10958234	TSS10370	5.75662	6.78889	5.92531	1	0.237916	0.0416615	-0.196254	1	0	0	3	1625
NM_023731	Ccdc86	chr19_11021756-11025757	TSS10372	11.7167	12.5358	7.31312	1	0.0974797	-0.679933	-0.777413	1	0	0	1	2494
NM_023529	Ms4a10	chr19_11047160-11051161	TSS10373	0.130791	0	0	1	-7.04211	-7.04211	0	1	0	0	1	275
NM_198224	Ms4a13	chr19_11269213-11273214	TSS10379	0	0	0	1	0	0	0	0	0	0	0	0
NM_001025565	Lhx9	chr1_140737021-140741022	TSS1038	0.16962	0.000358858	0.0567956	2	-6.97225	-1.56176	5.41049	2	3	3501	2	1500
NM_011502	Stx3	chr19_11891383-11895384	TSS10388	3.1528	3.05027	3.16005	1	-0.0476813	0.00331268	0.050994	1	0	0	1	3317
NM_152220	Stx3	chr19_11891893-11895894	TSS10389	12.4461	12.6636	16.1213	4	0.0249919	0.373248	0.348256	1	0	0	1	2807
NM_010714	Lhx9	chr1_140742156-140746157	TSS1039	0.0573485	0.0985865	0.140641	1	0.771255	1.27947	0.508217	2	2	3651	2	1875
NM_001011775	Olfr1419	chr19_11943704-11947705	TSS10392	0	0	0	1	0	0	0	1	0	0	1	71
NM_028450	Gulp1	chr1_44606515-44610516	TSS104	1.13221	1.2537	1.6637	1	0.146927	0.554847	0.40792	1	0	0	1	1250
NM_001081226	2310009B15Rik	chr1_140751431-140755432	TSS1040	3.37107	2.19182	3.35394	1	-0.620847	-0.00734752	0.6135	1	0	0	1	275
NM_172442	Dtx4	chr19_12574486-12578487	TSS10403	1.48871	2.16108	2.37247	1	0.537388	0.671966	0.134578	1	0	0	1	1425
NR_015503	A330040F15Rik	chr19_12669056-12673057	TSS10404	0.10604	0.104876	0.0306625	1	-0.0157744	-1.7573	-1.74153	2	2	300	1	1125
NM_053009	Zfp91	chr19_12868613-12872614	TSS10406	13.375	15.8938	13.2368	2	0.248908	-0.0149836	-0.263891	1	0	0	1	2450
NM_011600	Tle4	chr19_14670473-14674474	TSS10421	21.002	22.897	17.1802	1	0.124626	-0.289765	-0.414391	1	0	0	2	3125
NM_177420	Psat1	chr19_15997549-16001550	TSS10422	132.258	194.218	171.959	1	0.554318	0.378707	-0.175611	1	0	0	1	2726
NM_198019	Cep78	chr19_16057479-16061480	TSS10423	14.7175	12.2072	11.3488	1	-0.26978	-0.374964	-0.105184	1	0	0	1	1600
NM_173028	Vps13a	chr19_16853423-16857424	TSS10424	7.62495	6.78705	6.25819	1	-0.16792	-0.284941	-0.117021	1	0	0	1	1675
NM_008023	Foxb2	chr19_16946320-16950321	TSS10425	0	0	0	1	0	0	0	2	2	3676	2	2225
NM_173442	Gcnt1	chr19_17429157-17433158	TSS10427	0	2.36713	4.66215	1	11.2095	12.1871	0.977557	1	0	0	1	1175
NM_001190483	Pcsk5	chr19_17910122-17914123	TSS10429	0.138116	0.085042	0.202494	2	-0.693173	0.548698	1.24187	2	1	1378	1	2075
NM_017375	Ostf1	chr19_18704303-18708304	TSS10430	41.2771	26.2289	48.0529	1	-0.654164	0.219277	0.873441	1	0	0	1	1250
NM_001043354	Rorb	chr19_19183686-19187687	TSS10432	0.0192989	0	0	1	-4.34333	-4.34333	0	2	2	650	1	1700
NM_010266	Gda	chr19_21545151-21549152	TSS10436	0.322911	0.391176	1.16032	1	0.275904	1.8421	1.56619	2	1	25	1	700
NM_025423	1110059E24Rik	chr19_21725281-21729282	TSS10437	15.8393	14.5011	15.4313	1	-0.127338	-0.0376466	0.0896913	1	0	0	1	1925
NM_153808	Smc5	chr19_23346387-23350388	TSS10438	30.0994	26.05	28.0345	1	-0.208444	-0.102528	0.105916	1	0	0	1	725
NM_174857	Mamdc2	chr19_23520812-23524813	TSS10439	0.0896649	0.116639	0.159149	1	0.37575	0.820799	0.445048	1	0	0	1	1150
NM_026188	1700028P14Rik	chr19_23725302-23729303	TSS10440	0	0.0953723	0.0326414	1	6.59055	5.07217	-1.51838	1	0	0	1	275
NM_001114174	Fam189a2	chr19_24103509-24107510	TSS10441	0.865617	0.958504	2.44576	1	0.146894	1.49741	1.35051	2	2	1550	1	1325
NM_011597	Tjp2	chr19_24297516-24301517	TSS10442	42.6969	49.7534	41.2949	1	0.220659	-0.0481666	-0.268826	1	0	0	3	2559
NM_008044	Fxn	chr19_24353076-24357077	TSS10443	6.31563	8.2566	6.65214	1	0.386567	0.0748803	-0.311687	1	0	0	1	2100
NM_008846	Pip5k1b	chr19_24628317-24632318	TSS10444	0.967548	1.20416	0.736192	1	0.315329	-0.393783	-0.709112	1	0	0	1	1950
NM_026520	Fam122a	chr19_24549964-24553965	TSS10445	2.02175	2.27629	1.95205	1	0.171	-0.0505891	-0.221589	1	0	0	1	1675
NM_175013	Pgm5	chr19_24934332-24938333	TSS10446	0.336697	0.209223	0.336995	1	-0.683809	0.00127254	0.685081	2	1	50	1	800
NM_008022	Foxd4	chr19_24973799-24977800	TSS10447	0.0879442	0.0921602	0.0568358	1	0.0668132	-0.620938	-0.687751	2	1	2551	1	1826
NR_033744	Cbwd1	chr19_25034106-25038107	TSS10448	15.5941	15.1955	14.1752	2	-0.0373536	-0.137618	-0.100264	1	0	0	1	925
NM_177474	D19Bwg1357e	chr19_27502310-27506311	TSS10450	47.8703	53.8547	41.8387	1	0.169938	-0.194288	-0.364227	1	0	0	1	2550
NM_011265	Rfx3	chr19_28083656-28087657	TSS10452	1.61463	0.90192	1.08248	1	-0.839427	-0.576424	0.263002	1	0	0	1	2650
NM_175459	Glis3	chr19_28752567-28756568	TSS10453	0.747975	0.553134	0.703173	1	-0.434683	-0.0889877	0.345695	2	1	1325	1	2358
NM_198651	4430402I18Rik	chr19_29036644-29040645	TSS10455	0.0495104	0.0780819	0.0804552	1	0.646767	0.689426	0.0426593	1	0	0	1	1250
NM_021299	Ak3	chr19_29120392-29124393	TSS10457	5.38175	6.79212	6.73544	1	0.335731	0.323643	-0.012088	1	0	0	1	1125
NM_013754	Insl6	chr19_29397808-29401809	TSS10458	1.30558	1.16328	2.65656	1	-0.166357	1.02431	1.19066	1	0	0	1	300
NM_011272	Rln1	chr19_29407160-29411161	TSS10459	0.847576	0.796291	1.28575	1	-0.0899375	0.600616	0.690553	1	0	0	1	650
NM_145991	Cdc73	chr1_145547814-145551815	TSS1046	30.5987	34.9184	26.5866	1	0.190511	-0.202764	-0.393275	1	0	0	1	1900
NM_026362	5033414D02Rik	chr19_29434361-29438362	TSS10460	4.70137	5.30688	5.25896	1	0.174748	0.161664	-0.0130839	1	0	0	1	700
NR_015567	A930007I19Rik	chr19_29594477-29598478	TSS10461	0.107024	0.100352	0.0444376	1	-0.0919773	-1.24939	-1.15742	1	0	0	1	1950
NM_001081213	Ermp1	chr19_29720910-29724911	TSS10462	16.4829	18.7111	19.7426	1	0.182914	0.260327	0.0774136	1	0	0	1	1125
NM_172836	9930021J03Rik	chr19_29878499-29882500	TSS10463	6.72781	6.21839	5.94905	1	-0.113578	-0.17745	-0.0638713	1	0	0	1	1975
NM_177721	Ranbp6	chr19_29885464-29889465	TSS10464	2.20825	1.69269	2.22591	1	-0.383387	0.0114866	0.394873	1	0	0	1	1025
NM_138595	Gldc	chr19_30247908-30251909	TSS10465	49.7218	58.4095	58.2762	1	0.23232	0.229024	-0.00329617	1	0	0	2	1900
NR_003650	Ppp1r2-ps3	chr19_30612169-30616170	TSS10466	9.11129	9.40847	8.09339	1	0.0462998	-0.170891	-0.217191	1	0	0	1	225
NM_010051	Dkk1	chr19_30621986-30625987	TSS10467	0.734439	1.82377	1.28285	1	1.31104	0.803799	-0.507238	2	2	525	1	1225
NM_011160	Prkg1	chr19_31736860-31740861	TSS10468	0.170927	0	0	3	-7.42565	-7.42565	0	2	2	875	1	1650
NM_001013833	Prkg1	chr19_31837523-31841524	TSS10469	0.143405	0.244298	0.155553	1	0.764415	0.11653	-0.647884	2	2	825	2	1977
NM_013835	Trove2	chr1_145622181-145626182	TSS1047	8.02838	6.84893	7.81139	1	-0.229199	-0.0395246	0.189675	1	0	0	1	1850
NM_001168526	Sgms1	chr19_32283503-32287504	TSS10473	10.0857	8.88067	9.02733	1	-0.183551	-0.159923	0.0236282	1	0	0	2	1525
NM_144792	Sgms1	chr19_32460944-32464945	TSS10475	4.2393	2.55919	3.32102	1	-0.727915	-0.352106	0.37581	1	0	0	1	3245
NM_026487	Atad1	chr19_32784788-32788789	TSS10476	47.2476	55.3464	56.1981	1	0.228244	0.250275	0.0220315	1	0	0	2	1475
NM_001146342	Rnls	chr19_33464785-33468786	TSS10477	0.106698	0.316243	0.365755	2	1.5586	1.76782	0.209227	1	0	0	1	875
NM_001013770	Lipo1	chr19_33662801-33666802	TSS10478	1.65838	1.17738	1.48022	1	-0.493839	-0.163858	0.329981	1	0	0	1	450
NM_009061	Rgs2	chr1_145849279-145853280	TSS1048	1.68252	0.584075	1.95237	1	-1.52479	0.214484	1.73927	1	0	0	1	1200
NM_009890	Ch25h	chr19_34547625-34551626	TSS10481	0	0.0565591	0.269568	1	5.84697	8.07985	2.23288	2	1	200	1	1700
NM_001111100	Lipa	chr19_34599964-34603965	TSS10482	5.31521	6.26553	6.53293	2	0.237269	0.297553	0.0602847	1	0	0	1	775
NM_172838	Slc16a12	chr19_34819601-34823602	TSS10486	0.0420428	0.113338	0.128956	1	1.40946	1.59418	0.184718	2	2	1475	1	975
NM_023792	Pank1	chr19_34950407-34954408	TSS10487	1.94435	3.08001	3.06114	1	0.663374	0.654511	-0.00886312	1	0	0	1	1900
NM_001114339	Pank1	chr19_34951945-34955946	TSS10488	1.86206	2.49864	1.84297	1	0.424046	-0.014859	-0.438905	1	0	0	1	1900
NM_008315	Htr7	chr19_36129850-36133851	TSS10490	0	0.0167207	0.0431534	1	4.14736	5.46445	1.31709	2	2	800	1	1325
NM_016854	Ppp1r3c	chr19_36809094-36813095	TSS10493	0.73661	0.514418	0.771259	1	-0.517115	0.0662266	0.583342	1	0	0	1	850
NM_028263	Fgfbp3	chr19_36992089-36996090	TSS10494	0.693762	1.68699	1.03606	1	1.28072	0.577909	-0.702807	1	0	0	2	1300
NM_198300	Cpeb3	chr19_37279783-37283784	TSS10495	1.06277	1.37402	0.951236	1	0.370266	-0.159795	-0.530062	1	0	0	1	2275
NM_001099634	Myof	chr19_38116067-38120068	TSS10497	9.07326	5.0394	9.52745	1	-0.848242	0.0704616	0.918703	1	0	0	1	1475
NM_011255	Rbp4	chr19_38197301-38201302	TSS10498	1.22417	0.932246	1.18398	1	-0.392653	-0.0481192	0.344533	2	2	925	1	1250
NM_001159487	Rbp4	chr19_38197811-38201812	TSS10499	0	0	0.234571	1	0	7.88002	7.88002	2	2	925	1	1250
NM_001081075	5730455O13Rik	chr19_38296622-38300623	TSS10500	16.7312	13.9811	12.3493	1	-0.259046	-0.438081	-0.179035	1	0	0	1	1650
NM_021315	Noc3l	chr19_38891727-38895728	TSS10501	15.6515	15.4333	12.9547	1	-0.020253	-0.272806	-0.252553	1	0	0	2	1675
NM_016861	Pdlim1	chr19_40344106-40348107	TSS10509	44.3164	35.9678	37.0073	1	-0.301127	-0.260024	0.0411028	1	0	0	1	1950
NM_178362	Sorbs1	chr19_40586226-40590227	TSS10512	6.30642	4.1578	5.82398	10	-0.60088	-0.114797	0.486083	1	0	0	2	2325
NM_019698	Aldh18a1	chr19_40660953-40664954	TSS10513	21.93	29.2889	32.7792	2	0.41743	0.579854	0.162425	1	0	0	2	2375
NM_026260	Tctn3	chr19_40684705-40688706	TSS10514	2.11633	1.71357	1.69604	1	-0.304399	-0.319226	-0.0148262	1	0	0	1	875
NM_011904	Tll2	chr19_41279264-41283265	TSS10517	0	0.0132096	0	1	3.82879	0	-3.82879	1	0	0	1	1350
NM_133352	Tm9sf3	chr19_41336494-41340495	TSS10518	37.7252	34.8712	38.2104	1	-0.113489	0.0184363	0.131926	1	0	0	1	1750
NM_031376	Pik3ap1	chr19_41457560-41461561	TSS10519	0.349623	0.46058	0.438475	1	0.39666	0.32586	-0.0707996	2	1	1125	1	825
NM_008869	Pla2g4a	chr1_151806414-151810415	TSS1052	3.36976	1.55781	6.49873	1	-1.11263	0.947306	2.05993	1	0	0	1	250
NM_015748	Slit1	chr19_41816346-41820347	TSS10520	0.240576	0.279825	0.120161	1	0.217194	-0.995552	-1.21275	2	2	2225	1	1025
NM_027667	Arhgap19	chr19_41874574-41878575	TSS10521	39.8962	38.6755	39.08	2	-0.0448306	-0.0298219	0.0150087	1	0	0	2	1250
NM_177603	Frat2	chr19_41920622-41924623	TSS10522	8.02532	8.35603	7.46192	1	0.0582516	-0.104998	-0.16325	1	0	0	1	2300
NM_199447	Rrp12	chr19_41968643-41972644	TSS10523	25.1323	27.6156	18.6167	1	0.135936	-0.432925	-0.568861	1	0	0	1	1575
NM_001164561	Exosc1	chr19_42005804-42009805	TSS10524	21.6783	19.6736	20.1001	2	-0.139982	-0.109042	0.0309408	1	0	0	1	2100
NM_028152	Mms19	chr19_42053626-42057627	TSS10525	17.0427	15.1483	25.4781	1	-0.169987	0.580076	0.750063	1	0	0	1	2450
NM_198108	Morn4	chr19_42158860-42162861	TSS10526	8.71098	9.00496	8.82924	1	0.0478794	0.019452	-0.0284274	1	0	0	1	775
NM_027106	Avpi1	chr19_42201483-42205484	TSS10527	28.9032	29.9583	33.2513	1	0.0517248	0.202175	0.15045	1	0	0	4	2567
NM_018780	Sfrp5	chr19_42274742-42278743	TSS10528	0.369835	0.371166	0.407247	1	0.00516885	0.138665	0.133496	2	3	2225	1	1250
NM_145123	Crtac1	chr19_42504273-42508274	TSS10529	1.3633	1.21105	0.59779	1	-0.170712	-1.18804	-1.01733	2	4	675	1	2000
NR_015466	7530420F21Rik	chr1_151944896-151948897	TSS1053	0.217818	0	0.136796	1	-7.77359	-0.667197	7.10639	1	0	0	1	975
NM_001164311	Loxl4	chr19_42685296-42689297	TSS10530	0.550306	0.593774	0.702358	2	0.109489	0.351407	0.241918	2	1	125	1	900
NM_029011	Pyroxd2	chr19_42825265-42829266	TSS10531	0.12098	0.217431	0.201398	1	0.840533	0.73055	-0.109983	1	0	0	1	850
NM_019424	Hps1	chr19_42852466-42856467	TSS10532	6.78925	6.69826	5.26338	1	-0.0194629	-0.367201	-0.347738	1	0	0	2	1600
NM_001081257	Hpse2	chr19_43460845-43464846	TSS10533	0.0295927	0	0.0538977	1	-4.93512	0.843558	5.77867	2	1	2030	1	505
NM_010324	Got1	chr19_43597095-43601096	TSS10534	76.6739	66.1639	87.5339	1	-0.212688	0.191104	0.403792	1	0	0	1	1925
NM_145156	Slc25a28	chr19_43747371-43751372	TSS10535	12.6794	14.4275	18.5686	1	0.186321	0.550342	0.364021	1	0	0	1	2925
NM_144874	Cox15	chr19_43825490-43829491	TSS10536	11.2847	11.3539	11.2968	1	0.0088191	0.00154596	-0.00727313	1	0	0	2	1250
NM_030703	Cpn1	chr19_44059010-44063011	TSS10538	1.31643	1.97648	2.14278	1	0.585937	0.702431	0.116494	1	0	0	1	675
NM_001077237	BC003331	chr1_152238185-152242186	TSS1054	7.4352	6.15993	6.7745	2	-0.271418	-0.134238	0.13718	1	0	0	2	2200
NM_145502	Erlin1	chr19_44142176-44146177	TSS10540	10.3026	8.31855	10.3321	3	-0.308568	0.00412046	0.312689	1	0	0	1	1275
NM_001162410	Chuk	chr19_44179967-44183968	TSS10541	19.1249	18.8175	19.341	2	-0.0233782	0.0162071	0.0395853	1	0	0	1	1750
NM_001081077	Cwf19l1	chr19_44208366-44212367	TSS10542	7.57517	6.78912	5.91269	1	-0.158032	-0.35741	-0.199378	1	0	0	1	975
NM_028607	Bloc1s2	chr19_44218936-44222937	TSS10543	35.5765	34.6224	43.5774	1	-0.0392177	0.292648	0.331866	1	0	0	1	1525
NM_009127	Scd1	chr19_44480199-44484200	TSS10545	40.7715	45.9271	34.636	1	0.171781	-0.235282	-0.407063	1	0	0	1	2725
NM_001033343	Sec31b	chr19_44618338-44622339	TSS10546	0.624038	0.328585	0.342043	1	-0.923293	-0.865554	0.0577388	1	0	0	1	900
NM_026061	Ndufb8	chr19_44627905-44631906	TSS10547	74.127	71.6017	82.5157	1	-0.0500046	0.154668	0.204672	1	0	0	1	1400
NM_053164	Mrpl43	chr19_45078932-45082933	TSS10548	30.5598	25.5047	29.0949	1	-0.260863	-0.0708664	0.189996	1	0	0	1	2800
NM_001195265	Pdzd7	chr19_45118262-45122263	TSS10549	0.584563	0.833216	0.311626	1	0.510597	-0.905387	-1.41598	1	0	0	1	1463
NM_010691	Lbx1	chr19_45307726-45311727	TSS10550	0.0401242	0.0372196	0.0221774	1	-0.105675	-0.827269	-0.721594	2	2	3726	3	2650
NM_020032	Poll	chr19_45633033-45637034	TSS10551	5.62337	5.81917	6.2378	1	0.0493698	0.149577	0.100207	1	0	0	1	1500
NM_013907	Fbxw4	chr19_45732683-45736684	TSS10552	4.8564	6.0064	7.09777	1	0.306556	0.547385	0.240828	2	1	100	1	1525
NM_001166361	Fgf8	chr19_45815374-45819375	TSS10553	0.944181	0.744671	0.300011	4	-0.34205	-1.65077	-1.30872	2	2	3601	1	2325
NM_008723	Npm3	chr19_45822053-45826054	TSS10554	44.6424	57.4107	69.1819	1	0.362898	0.631969	0.269071	1	0	0	1	1700
NM_023799	Mgea5	chr19_45855781-45859782	TSS10555	42.8795	47.2806	43.9287	1	0.140957	0.0348749	-0.106082	1	0	0	2	2644
NM_145704	Kcnip2	chr19_45888293-45892294	TSS10556	2.94734	1.95481	2.87706	3	-0.592134	-0.0348077	0.557327	1	0	0	2	1769
NM_198296	9130011E15Rik	chr19_46070978-46074979	TSS10557	7.14759	7.62628	7.73529	1	0.09351	0.113983	0.0204732	1	0	0	1	1425
NM_010697	Ldb1	chr19_46112111-46116112	TSS10559	6.96539	9.40946	7.33195	1	0.433854	0.0739825	-0.359872	1	0	0	2	3401
NM_001024720	Hmcn1	chr1_152838565-152842566	TSS1056	0.0682341	0.0953989	0.0626781	1	0.477534	-0.120685	-0.598219	1	0	0	1	1100
NM_001113408	Ldb1	chr19_46117701-46121702	TSS10560	33.119	31.1237	31.3861	1	-0.0896427	-0.0775309	0.0121118	1	0	0	1	3824
NM_008852	Pitx3	chr19_46220815-46224816	TSS10561	0.394455	0.224783	0.073872	1	-0.808577	-2.40102	-1.59244	2	2	2475	1	1650
NM_028627	Psd	chr19_46399646-46403647	TSS10562	1.55769	1.67478	1.51595	1	0.104499	-0.0391605	-0.143659	1	0	0	1	2647
NM_001164292	Cuedc2	chr19_46411150-46415151	TSS10563	32.1282	36.5578	35.8494	10	0.186335	0.158105	-0.0282303	1	0	0	1	1425
NM_016860	Actr1a	chr19_46468225-46472226	TSS10564	32.5585	25.8892	35.0042	1	-0.330672	0.104491	0.435163	1	0	0	3	2551
NM_019718	Arl3	chr19_46645575-46649576	TSS10565	31.8336	37.5387	40.0093	1	0.237821	0.329776	0.0919543	1	0	0	2	1975
NM_029810	Nt5c2	chr19_47034841-47038842	TSS10567	6.82281	11.1773	5.31022	3	0.712051	-0.361535	-1.07359	1	0	0	1	1725
NR_028353	Nt5c2	chr19_47034841-47038842	TSS10568	0	0	3.03201	1	0	11.5665	11.5665	1	0	0	1	1725
NM_001164363	Nt5c2	chr19_47087679-47091680	TSS10569	1.22395	2.58698	1.05435	1	1.0791	-0.215001	-1.2941	2	1	225	1	3425
NM_025819	1200016B10Rik	chr1_153273565-153277566	TSS1057	12.319	9.40649	11.9946	1	-0.389121	-0.0384969	0.350624	1	0	0	1	1475
NM_027654	Pcgf6	chr19_47123335-47127336	TSS10570	25.7353	23.2993	25.5222	1	-0.143456	-0.0119954	0.131461	1	0	0	1	1950
NM_023211	Usmg5	chr19_47163115-47167116	TSS10571	97.9257	90.4556	97.8292	1	-0.114476	-0.00142238	0.113054	1	0	0	1	1800
NM_133746	Calhm2	chr19_47210784-47214785	TSS10572	1.0983	0.628177	0.832506	1	-0.805047	-0.399321	0.405727	1	0	0	2	1925
NM_001081271	Calhm1	chr19_47216664-47220665	TSS10573	0	0	0	1	0	0	0	1	0	0	1	250
NM_008018	Sh3pxd2a	chr19_47536901-47540902	TSS10574	6.14243	6.21556	5.93286	2	0.0170721	-0.0500735	-0.0671456	1	0	0	1	1950
NM_175360	Obfc1	chr19_47609510-47613511	TSS10575	9.77782	9.7957	9.1372	1	0.00263547	-0.0977504	-0.100386	1	0	0	1	1650
NM_027559	Wdr96	chr19_47909851-47913852	TSS10577	0.740823	0.502689	0.563734	1	-0.558542	-0.393504	0.165038	1	0	0	1	1100
NM_001001738	Itprip	chr19_47991789-47995790	TSS10578	1.17985	1.24287	1.72728	1	0.07501	0.549511	0.474501	1	0	0	1	1325
NM_021377	Sorcs1	chr19_50751136-50755137	TSS10579	0.106371	0.21472	0.344182	1	1.00656	1.68475	0.678197	2	3	639	1	1425
NM_011277	Rnf2	chr1_153345953-153349954	TSS1058	35.4323	36.5729	40.6036	1	0.0457086	0.196537	0.150829	1	0	0	1	1575
NM_133216	Xpnpep1	chr19_53111032-53115033	TSS10580	55.925	49.4089	56.3793	1	-0.178719	0.011672	0.190391	1	0	0	1	2300
NM_172429	Smndc1	chr19_53463063-53467064	TSS10582	49.2999	47.5445	42.8352	1	-0.0523052	-0.202783	-0.150478	1	0	0	2	2600
NM_001195348	Bbip1	chr19_54017117-54021118	TSS10584	4.6015	5.45757	5.03439	2	0.246105	0.129685	-0.11642	1	0	0	1	2550
NM_008149	Gpam	chr19_55171937-55175938	TSS10585	3.64931	2.84419	3.16211	1	-0.359494	-0.206675	0.152819	1	0	0	1	1750
NM_001033573	Zdhhc6	chr19_55388522-55392523	TSS10587	15.3534	14.2818	16.4062	2	-0.104373	0.0956805	0.200053	1	0	0	1	1600
NM_018831	Dclre1a	chr19_56620712-56624713	TSS10589	3.91442	3.06389	3.34764	1	-0.353332	-0.225592	0.12774	1	0	0	1	2125
NM_197990	1700025G04Rik	chr1_153935450-153939451	TSS1059	1.63176	1.52851	1.27789	1	-0.0942432	-0.352421	-0.258177	1	0	0	1	2500
NM_001177796	Afap1l2	chr19_57081065-57085066	TSS10591	0.52287	0.509708	0.699579	3	-0.0367096	0.419339	0.456048	2	1	75	1	1150
NM_001103178	Ablim1	chr19_57191499-57195500	TSS10592	0	0	0	1	0	0	0	1	0	0	2	750
NM_001103177	Ablim1	chr19_57269982-57273983	TSS10593	0.558957	0.678753	1.34343	1	0.279695	1.26361	0.983912	1	0	0	1	975
NM_010279	Gfra1	chr19_58526956-58530957	TSS10595	0.3384	0.387489	0.711351	1	0.194887	1.0696	0.874715	2	3	3100	1	3050
NM_026208	1700019N19Rik	chr19_58866904-58870905	TSS10596	0.11007	0	0.143099	1	-6.79533	0.375591	7.17092	1	0	0	1	250
NM_175199	Hspa12a	chr19_58933474-58937475	TSS10597	2.14791	1.90334	2.8687	1	-0.174314	0.417295	0.591609	1	0	0	1	1975
NM_001114312	4930506M07Rik	chr19_59148559-59152560	TSS10598	0.745204	0.697197	0.857561	2	-0.0959368	0.20235	0.298286	2	2	775	1	1200
NM_009501	Vax1	chr19_59242519-59246520	TSS10599	0	0.0697031	0.0621026	1	6.1437	5.97963	-0.164074	2	2	3751	2	2220
NM_028599	Wdr75	chr1_45850345-45854346	TSS106	58.7029	61.5686	56.902	1	0.0687618	-0.0449516	-0.113713	1	0	0	2	1800
NM_025677	Tsen15	chr1_154231812-154235813	TSS1060	12.2792	13.3609	19.4529	1	0.121791	0.663725	0.541934	1	0	0	1	700
NM_001033222	Pdzd8	chr19_59418270-59422271	TSS10600	8.41471	7.95442	6.48098	1	-0.0811469	-0.37665	-0.295504	1	0	0	1	2525
NR_002863	Emx2os	chr19_59531125-59535126	TSS10601	0.219632	0.327354	0.368554	1	0.57361	0.744143	0.170533	2	2	3375	1	2100
NM_001033172	Rab11fip2	chr19_60017267-60021268	TSS10602	3.73618	3.04244	4.16142	2	-0.296247	0.155472	0.45172	1	0	0	1	1325
NM_001164367	Rab11fip2	chr19_60017557-60021558	TSS10603	0.593333	1.03778	1.27739	2	0.805547	1.10498	0.299438	1	0	0	1	1325
NM_029648	D19Ertd737e	chr19_60300600-60304601	TSS10604	11.1651	9.38144	9.89606	1	-0.25109	-0.174053	0.0770369	1	0	0	1	650
NM_201615	Prlhr	chr19_60542207-60546208	TSS10605	0	0	0	1	0	0	0	2	1	1150	1	1100
NM_001172097	2700078E11Rik	chr19_60654926-60658927	TSS10606	21.2299	22.6326	19.4523	3	0.0923011	-0.12615	-0.218451	1	0	0	1	2000
NM_010123	Eif3a	chr19_60864596-60868597	TSS10607	272.799	289.537	235.986	1	0.0859091	-0.209136	-0.295045	1	0	0	2	2279
NM_053198	Sfxn4	chr19_60935333-60939334	TSS10609	2.03075	2.48523	1.54024	1	0.291237	-0.398631	-0.689868	1	0	0	1	725
NM_016846	Rgl1	chr1_154470241-154474242	TSS1061	1.10698	1.63999	1.79471	1	0.566635	0.696623	0.129988	2	1	1000	1	1150
NM_007452	Prdx3	chr19_60948441-60952442	TSS10610	26.8213	27.0541	31.2186	1	0.0124676	0.219019	0.206551	1	0	0	1	1150
NM_001177513	Gm7102	chr19_61250212-61254213	TSS10611	9.95679	11.8915	5.50428	1	0.256155	-0.85501	-1.11116	1	0	0	1	450
NM_009970	Csf2ra	chr19_61302321-61306322	TSS10612	3.63445	4.63172	4.80394	1	0.349726	0.402384	0.0526589	1	0	0	1	2379
NM_001160256	Smg7	chr1_154747776-154751777	TSS1062	12.3206	15.4221	8.31982	3	0.323909	-0.56639	-0.890299	1	0	0	1	2675
NM_001081161	Fam171a1	chr2_3033659-3037660	TSS10620	1.91926	2.05605	2.14281	1	0.0992752	0.158875	0.0596002	1	0	0	1	1250
NM_008708	Nmt2	chr2_3199559-3203560	TSS10621	35.6726	32.5994	31.8079	1	-0.129967	-0.165426	-0.0354592	1	0	0	2	2225
NM_030063	Acbd7	chr2_3251439-3255440	TSS10622	0.433802	0.405435	0.635458	1	-0.0973339	0.549707	0.647041	1	0	0	1	925
NM_001110214	Dclre1c	chr2_3339402-3343403	TSS10623	7.51956	6.86666	5.77027	3	-0.13102	-0.381951	-0.250931	1	0	0	1	900
NM_177647	Cdnf	chr2_3428336-3432337	TSS10624	0.602907	0.747005	0.826776	1	0.308722	0.454914	0.146193	1	0	0	1	1450
NM_025626	Fam107b	chr2_3628729-3632730	TSS10625	16.1401	10.6572	15.4469	1	-0.598775	-0.0633282	0.535447	1	0	0	1	975
NM_172475	Frmd4a	chr2_4071908-4075909	TSS10626	0.331756	0.958094	1.20877	1	1.52721	1.8622	0.334989	1	0	0	1	625
NM_001177843	Frmd4a	chr2_4320021-4324022	TSS10627	0.925598	0.0994496	0.176928	2	-3.20547	-2.38065	0.824823	1	0	0	1	1700
NM_001177844	Frmd4a	chr2_4478799-4482800	TSS10628	2.27202	2.42879	1.51841	2	0.0962193	-0.581101	-0.67732	1	0	0	1	1125
NM_178663	Bend7	chr2_4636876-4640877	TSS10629	0.698768	0.768251	0.633468	2	0.136576	-0.141329	-0.277905	2	1	125	1	1600
NM_001005507	Smg7	chr1_154747776-154751777	TSS1063	23.5355	19.5359	18.7755	3	-0.268701	-0.325971	-0.0572704	1	0	0	1	2675
NM_175400	Sephs1	chr2_4800609-4804610	TSS10630	20.5301	23.2882	20.7693	1	0.18185	0.0167111	-0.165139	1	0	0	1	2885
NM_010726	Phyh	chr2_4838041-4842042	TSS10631	19.022	15.1203	18.8559	1	-0.331163	-0.0126523	0.31851	1	0	0	1	1050
NM_028804	Ccdc3	chr2_5056821-5060822	TSS10633	2.13455	1.67973	1.81918	1	-0.34552	-0.230527	0.114993	1	0	0	2	1825
NM_016918	Nudt5	chr2_5764079-5768080	TSS10634	31.5562	27.4189	30.5897	1	-0.202746	-0.0448761	0.15787	1	0	0	1	2025
NM_001081132	Upf2	chr2_5870514-5874515	TSS10635	20.5224	18.7796	21.4855	1	-0.128027	0.0661607	0.194187	1	0	0	1	2100
NR_033470	Gm10857	chr2_6051914-6055915	TSS10636	0.497308	0.423706	0.317631	2	-0.230572	-0.645149	-0.414576	1	0	0	1	200
NM_001080548	Usp6nl	chr2_6241802-6245803	TSS10637	7.02343	7.8658	5.30027	1	0.163396	-0.406043	-0.569439	1	0	0	1	1750
NR_024257	4930412O13Rik	chr2_9800872-9804873	TSS10639	0.0084328	0.00842735	0.0112456	1	-0.000833789	0.376505	0.377339	2	1	3423	3	2351
NM_008485	Lamc2	chr1_155031577-155035578	TSS1064	2.30878	2.29655	4.08382	1	-0.00765919	0.822517	0.830176	2	1	150	1	975
NM_025280	Kin	chr2_10000238-10004239	TSS10640	11.5957	15.1084	11.825	1	0.381732	0.0282479	-0.353484	1	0	0	2	2100
NM_172471	Itih5	chr2_10073169-10077170	TSS10641	0.121767	0.182844	0.0695134	1	0.582559	-0.799953	-1.38251	1	0	0	1	925
NM_177386	Sfmbt2	chr2_10292062-10296063	TSS10642	6.60807	4.11717	3.21794	1	-0.682444	-1.03786	-0.355418	2	1	825	1	4001
NM_010683	Lamc1	chr1_155177916-155181917	TSS1065	61.382	65.84	98.3213	1	0.101147	0.67968	0.578532	1	0	0	1	2900
NR_033736	E330020D12Rik	chr1_155259363-155263364	TSS1066	3.93345	4.16695	2.75689	1	0.083176	-0.512597	-0.595773	1	0	0	1	175
NM_008859	Prkcq	chr2_11092008-11096009	TSS10669	0.0936836	0	0.0100285	1	-6.56504	-3.10188	3.46316	1	0	0	1	725
NM_007842	Dhx9	chr1_155332790-155336791	TSS1067	61.9533	114.599	56.7171	1	0.887331	-0.127395	-1.01473	1	0	0	2	1860
NM_133836	Il15ra	chr2_11625162-11629163	TSS10671	0	0	0.127604	1	0	7.00679	7.00679	2	2	475	1	1400
NM_008358	Il15ra	chr2_11625474-11629475	TSS10672	0	0.161207	0.279004	3	7.34169	8.1293	0.787611	2	3	750	1	1400
NM_177268	Ankrd16	chr2_11697379-11701380	TSS10673	2.74686	2.26928	2.45121	1	-0.275438	-0.164226	0.111212	1	0	0	1	2650
NM_008961	Pter	chr2_12843667-12847668	TSS10674	1.64351	0.94271	1.20183	1	-0.801242	-0.451225	0.350017	1	0	0	1	575
NM_011701	Vim	chr2_13493937-13497938	TSS10675	87.1298	52.1643	106.703	1	-0.740092	0.29236	1.03245	1	0	0	1	2325
NM_011484	Stam	chr2_13993738-13997739	TSS10676	13.2316	10.5128	15.504	1	-0.331812	0.228637	0.560449	1	0	0	1	1700
NM_028749	Npl	chr1_155394844-155398845	TSS1068	8.49245	12.9145	31.2751	1	0.604681	1.88064	1.27596	1	0	0	1	700
NM_023116	Cacnb2	chr2_14523932-14527933	TSS10681	0.203781	0.211274	0.119645	1	0.0518458	-0.763314	-0.81516	2	1	850	1	1475
NM_029466	Arl5b	chr2_14974988-14978989	TSS10683	13.8266	14.5683	12.282	1	0.0753808	-0.170888	-0.246269	1	0	0	1	1600
NM_026162	Plxdc2	chr2_16275948-16279949	TSS10684	2.95041	1.99052	3.80098	1	-0.567534	0.365347	0.932881	1	0	0	1	2600
NR_028378	Gm17762	chr2_17946875-17950876	TSS10685	0.106511	0.137108	0.344478	1	0.361313	1.68411	1.3228	2	3	776	1	3375
NM_010804	Mllt10	chr2_17974863-17978864	TSS10686	22.0603	25.4761	24.629	1	0.207683	0.158899	-0.0487844	1	0	0	2	1889
NM_147778	Commd3	chr2_18592088-18596089	TSS10687	22.5533	13.2583	24.4125	1	-0.766398	0.114277	0.880675	2	3	789	1	1350
NM_007552	Bmi1	chr2_18596644-18600645	TSS10688	3.49818	2.81914	3.80329	1	-0.31125	0.12061	0.43186	2	2	2401	1	2200
NM_001001334	BC061194	chr2_18618648-18622649	TSS10689	0.0327268	0	0.0579039	1	-5.07582	0.804468	5.88029	2	2	2725	1	875
NR_024323	4930426L09Rik	chr2_18917945-18921946	TSS10690	0	0.0323585	0.0408988	1	5.05998	5.38884	0.328855	1	0	0	1	2275
NM_001081083	Armc3	chr2_19118744-19122745	TSS10691	0	0	0	1	0	0	0	1	0	0	1	1025
NM_029619	Msrb2	chr2_19291262-19295263	TSS10692	2.7982	3.52477	2.1142	1	0.332924	-0.40422	-0.737144	1	0	0	1	1050
NM_018809	Ptf1a	chr2_19365289-19369290	TSS10693	0.0296337	0	0.0168134	1	-4.93705	-0.782157	4.15489	2	2	3315	1	1775
NM_027715	Otud1	chr2_19577688-19581689	TSS10694	6.43269	6.0861	4.91034	1	-0.0798914	-0.38953	-0.309638	1	0	0	1	2475
NM_001177631	Etl4	chr2_20439139-20443140	TSS10697	13.386	16.485	16.2943	2	0.300416	0.283625	-0.0167913	1	0	0	1	2150
NR_033225	Gm13375	chr2_20888500-20892501	TSS10698	1.4792	1.80757	2.17065	1	0.289057	0.552999	0.263942	1	0	0	1	3125
NM_001001297	Thnsl1	chr2_21125350-21129351	TSS10699	6.20338	5.4	6.08335	2	-0.200061	-0.0281837	0.171877	1	0	0	1	1425
NM_001160386	Dnahc7b	chr1_46121582-46125583	TSS107	0.0620018	0.0873699	0.0418534	1	0.488162	-0.555983	-1.04415	1	0	0	1	675
NM_009782	Cacna1e	chr1_156571050-156575051	TSS1070	0	0.00407894	0.00826834	1	2.34453	3.21231	0.867784	2	2	3326	1	1400
NM_001004761	Gpr158	chr2_21287193-21291194	TSS10700	0	0	0.0102069	1	0	3.48632	3.48632	2	1	1175	1	1975
NM_148413	Myo3a	chr2_22147129-22151130	TSS10701	0.0818324	0.0207559	0	1	-1.92879	-6.37212	-4.44333	1	0	0	1	575
NM_008078	Gad2	chr2_22475846-22479847	TSS10702	0.425587	0.539714	0.246554	1	0.342026	-0.785097	-1.12712	2	2	3347	1	2175
NM_019456	Apbb1ip	chr2_22627846-22631847	TSS10703	1.64922	0.905698	1.74357	1	-0.863964	0.0802131	0.944177	2	2	425	1	725
NM_019501	Pdss1	chr2_22749041-22753042	TSS10704	5.60411	5.34557	4.58482	1	-0.068129	-0.289563	-0.221434	1	0	0	1	1600
NM_028793	Acbd5	chr2_22921720-22925721	TSS10705	7.40054	6.17077	8.08248	2	-0.262142	0.127151	0.389293	1	0	0	1	2000
NM_001102437	Acbd5	chr2_22922591-22926592	TSS10706	2.55562	2.97836	1.92283	2	0.220761	-0.410257	-0.631018	1	0	0	1	2000
NM_013771	Yme1l1	chr2_23010024-23014025	TSS10707	67.7251	66.7027	74.424	1	-0.0219451	0.136075	0.158021	1	0	0	2	2325
NM_008752	Nxph2	chr2_23174765-23178766	TSS10709	0	0	0	1	0	0	0	1	0	0	1	875
NM_010500	Ier5	chr1_156944766-156948767	TSS1071	7.70713	5.00856	9.02014	1	-0.621697	0.226929	0.848626	2	1	1700	1	1750
NM_177611	Psd4	chr2_24238916-24242917	TSS10718	0.632267	0.208989	0.635623	1	-1.5925	0.00762538	1.60013	1	0	0	2	900
NM_026021	Zmynd19	chr2_24803321-24807322	TSS10719	42.9399	50.201	38.2933	1	0.225392	-0.165223	-0.390615	1	0	0	1	2350
NM_026044	Wdr85	chr2_24815941-24819942	TSS10720	7.64929	7.48919	8.09168	1	-0.0305121	0.0811031	0.111615	1	0	0	1	1300
NM_146251	Pnpla7	chr2_24829552-24833553	TSS10721	3.70533	2.55549	2.98659	1	-0.535827	-0.311009	0.224818	1	0	0	1	2150
NM_020276	Nelf	chr2_24907898-24911899	TSS10722	1.75046	1.66643	2.53703	7	-0.0709311	0.535153	0.606084	1	0	0	2	1475
NM_025980	Nrarp	chr2_25034277-25038278	TSS10724	4.30187	4.3821	4.91386	1	0.0266523	0.191851	0.165199	1	0	0	2	2303
NM_176834	Rnf208	chr2_25096448-25100449	TSS10726	3.64375	4.13271	4.10733	1	0.181617	0.172732	-0.00888511	1	0	0	2	2427
NM_177344	Tmem203	chr2_25108958-25112959	TSS10727	5.15627	3.86928	5.09956	1	-0.41417	-0.0159519	0.398218	1	0	0	1	2050
NM_175286	Tprn	chr2_25116117-25120118	TSS10728	6.58736	6.30381	5.39908	1	-0.0634665	-0.286939	-0.223472	1	0	0	1	2593
NM_175300	Anapc2	chr2_25125985-25129986	TSS10729	29.7559	25.2624	24.6568	1	-0.236175	-0.27118	-0.0350047	1	0	0	1	2750
NM_011273	Xpr1	chr1_157262574-157266575	TSS1073	4.45782	3.8043	4.52199	1	-0.228652	0.0206148	0.249267	1	0	0	1	875
NM_030055	Tmem210	chr2_25141664-25145665	TSS10730	0	0	0	1	0	0	0	2	1	1340	1	415
NM_146117	Lrrc26	chr2_25143430-25147431	TSS10731	0.097011	0	0	1	-6.61487	-6.61487	0	2	1	3106	1	2181
NM_001029983	Man1b1	chr2_25186262-25190263	TSS10732	18.984	19.3319	27.4131	1	0.0261981	0.530058	0.50386	1	0	0	1	2300
NM_001081085	2010317E24Rik	chr2_25225840-25229841	TSS10733	8.38234	8.88032	7.91346	1	0.083249	-0.0830342	-0.166283	1	0	0	1	1975
NM_009849	Entpd2	chr2_25249393-25253394	TSS10734	1.32825	1.37631	1.03721	1	0.0512408	-0.356514	-0.407755	2	1	1300	1	1050
NM_008721	Npdc1	chr2_25256602-25260603	TSS10735	11.7658	9.64265	10.4774	1	-0.287071	-0.167304	0.119767	2	1	150	1	1275
NM_001177366	Fut7	chr2_25277213-25281214	TSS10736	0.141189	0.0255411	0.0830518	3	-2.42151	-0.758463	1.66305	2	1	364	1	889
NM_007379	Abca2	chr2_25282193-25286194	TSS10737	5.20524	5.54547	4.67384	1	0.0913281	-0.155325	-0.246653	2	1	250	1	950
NM_027085	Clic3	chr2_25310362-25314363	TSS10738	0.326873	0.324889	0.246104	1	-0.00875645	-0.408019	-0.399262	1	0	0	2	275
NM_013908	Fbxw5	chr2_25354297-25358298	TSS10739	10.39	8.15477	10.9218	1	-0.349442	0.0720082	0.42145	1	0	0	1	2225
NM_010712	Lhx4	chr1_157587157-157591158	TSS1074	0	0.0224498	0.014409	1	4.5515	3.9457	-0.605802	2	2	3443	1	2775
NM_021519	Edf1	chr2_25411419-25415420	TSS10740	71.519	81.9309	78.1422	1	0.196079	0.127774	-0.0683049	1	0	0	1	1775
NM_023326	Bmyc	chr2_25560398-25564399	TSS10746	4.03373	6.01243	5.98428	1	0.575716	0.568947	-0.00676938	1	0	0	1	975
NM_023268	Qsox1	chr1_157658029-157662030	TSS1075	7.78822	7.79401	11.637	2	0.00107201	0.579296	0.578224	1	0	0	1	1425
NM_001145403	Kcnt1	chr2_25717373-25721374	TSS10751	0.70738	0.320204	0.183526	3	-1.14103	-1.9407	-0.799671	1	0	0	1	1125
NM_175462	Kcnt1	chr2_25731380-25735381	TSS10752	0	0.130571	0.0329989	1	7.0397	5.08742	-1.95228	2	2	350	1	1025
NM_153410	Gpsm1	chr2_26169052-26173053	TSS10753	3.50978	3.2338	3.48046	1	-0.118115	-0.0120991	0.106016	1	0	0	1	1250
NM_173180	Pmpca	chr2_26242867-26246868	TSS10754	42.9657	47.3257	48.1855	1	0.139435	0.16541	0.0259747	1	0	0	1	1875
NM_178444	Egfl7	chr2_26434575-26438576	TSS10755	0	0	0	3	0	0	0	1	0	0	1	300
NM_198724	Egfl7	chr2_26437383-26441384	TSS10756	0.272146	0.269114	0.351486	2	-0.0161037	0.367893	0.383997	1	0	0	1	300
NM_001164564	Egfl7	chr2_26440149-26444150	TSS10757	17.7378	14.4801	19.2158	2	-0.292741	0.115461	0.408202	1	0	0	1	1550
NM_019833	Fam69b	chr2_26481976-26485977	TSS10759	2.55276	3.61774	2.55541	1	0.502865	0.00149629	-0.501368	1	0	0	1	1525
NM_001039184	Cep350	chr1_157818385-157822386	TSS1076	3.53072	2.97686	2.5283	1	-0.246095	-0.481633	-0.235538	1	0	0	1	2150
NM_013721	Rpl7a	chr2_26764326-26768327	TSS10760	700.225	754.461	763.198	1	0.107628	0.124239	0.016611	1	0	0	2	3676
NM_013678	Surf2	chr2_26769940-26773941	TSS10761	15.1746	17.6093	14.5858	1	0.214666	-0.0570901	-0.271756	1	0	0	1	2450
NM_198628	Gm711	chr2_26787588-26791589	TSS10762	0.107809	0.10202	0.0669427	1	-0.0788734	-0.679407	-0.600534	1	0	0	1	1875
NM_029862	5930434B04Rik	chr2_26863445-26867446	TSS10764	4.72933	4.59232	5.03702	1	-0.0424035	0.090916	0.13332	1	0	0	1	1325
NM_029981	Adamtsl2	chr2_26932900-26936901	TSS10765	0.0126755	0	0	1	-3.77352	-3.77352	0	1	0	0	1	400
NM_080848	Wdr5	chr2_27368666-27372667	TSS10767	69.9112	69.3555	61.315	1	-0.0115131	-0.189281	-0.177768	1	0	0	1	3167
NM_011305	Rxra	chr2_27530720-27534721	TSS10768	4.86008	5.11154	4.53614	1	0.0727633	-0.0994937	-0.172257	2	2	700	1	2300
NM_015734	Col5a1	chr2_27739944-27743945	TSS10769	3.5701	2.53895	4.41139	1	-0.491568	0.305192	0.79676	2	1	1195	1	1700
NM_001160019	Tor1aip1	chr1_157879947-157883948	TSS1077	2.7641	0.786576	1.43271	1	-1.81184	-0.947578	0.864262	1	0	0	1	1700
NM_001038614	Olfm1	chr2_28046612-28050613	TSS10771	1.96052	1.32197	2.10895	2	-0.568192	0.105237	0.673428	2	2	425	1	1400
NM_019498	Olfm1	chr2_28059208-28063209	TSS10772	0.638332	1.68842	0.791838	2	1.40189	0.310461	-1.09143	2	2	675	1	1375
NM_001005420	Ppp1r26	chr2_28301460-28305461	TSS10773	1.18608	1.24553	0.851135	1	0.0705004	-0.478263	-0.548764	1	0	0	1	1425
NM_080452	Mrps2	chr2_28321585-28325586	TSS10774	28.9496	28.4195	26.593	2	-0.0266613	-0.122492	-0.0958311	1	0	0	2	2851
NM_009058	Ralgds	chr2_28366686-28370687	TSS10776	4.04515	3.68681	4.16118	2	-0.133788	0.0407895	0.174578	1	0	0	1	2500
NM_001145835	Ralgds	chr2_28386983-28390984	TSS10777	5.33325	4.11402	2.36726	2	-0.374386	-1.17146	-0.797074	1	0	0	1	725
NM_022887	Tsc1	chr2_28494762-28498763	TSS10778	6.82799	6.08714	8.814	1	-0.165671	0.368288	0.533959	1	0	0	1	1750
NM_001033874	Ak8	chr2_28553680-28557681	TSS10779	0.569513	0.232071	0.281504	1	-1.29149	-1.01399	0.277502	1	0	0	1	1400
NM_001160018	Tor1aip1	chr1_157881610-157885611	TSS1078	2.67632	3.81635	2.88327	2	0.511781	0.107417	-0.404364	1	0	0	2	1800
NM_001033294	Ddx31	chr2_28693925-28697926	TSS10780	3.59331	4.31708	4.09386	1	0.264675	0.188099	-0.0765758	1	0	0	2	2025
NM_009442	Ttf1	chr2_28913782-28917783	TSS10781	8.28429	8.3439	8.49057	1	0.0103426	0.0354791	0.0251366	1	0	0	1	1450
NM_198033	Setx	chr2_28978511-28982512	TSS10782	41.9766	29.9645	28.9779	1	-0.486317	-0.534617	-0.0482996	1	0	0	3	2276
NM_026896	Med27	chr2_29200355-29204356	TSS10783	8.26387	6.33016	7.16977	1	-0.384522	-0.204864	0.179658	1	0	0	1	875
NM_001039086	Rapgef1	chr2_29473239-29477240	TSS10784	22.0616	19.9669	19.1421	6	-0.143921	-0.204779	-0.0608575	1	0	0	2	1700
NM_178693	Coq4	chr2_29641782-29645783	TSS10786	2.12813	1.84448	2.1705	1	-0.206268	0.0284279	0.234696	1	0	0	1	2675
NM_011989	Slc27a4	chr2_29656199-29660200	TSS10787	5.32704	5.29942	5.45361	1	-0.00749823	0.0338711	0.0413694	1	0	0	1	1075
NM_026615	Urm1	chr2_29680908-29684909	TSS10788	12.7724	14.3336	13.3812	1	0.166359	0.0671727	-0.0991863	1	0	0	2	2425
NM_207298	Cercam	chr2_29723013-29727014	TSS10789	6.92106	5.75225	6.07727	1	-0.266824	-0.187541	0.0792836	1	0	0	1	1725
NM_177838	Fam163a	chr1_158133156-158137157	TSS1079	0.0528561	0.0926723	0.0510616	1	0.798513	-0.0488901	-0.847403	2	1	2600	1	1150
NM_001113213	Odf2	chr2_29743239-29747240	TSS10790	53.0416	47.4841	46.7312	7	-0.159675	-0.182734	-0.023059	1	0	0	1	2865
NM_013615	Odf2	chr2_29743582-29747583	TSS10791	35.9461	29.4795	28.076	4	-0.286115	-0.356488	-0.0703731	1	0	0	1	2925
NM_028923	Gle1	chr2_29788928-29792929	TSS10792	13.5287	15.6193	15.722	1	0.207292	0.216747	0.00945435	1	0	0	1	1275
NM_001177667	Spna2	chr2_29819079-29823080	TSS10793	57.4537	40.7226	41.5643	5	-0.496561	-0.467045	0.0295167	1	0	0	2	1900
NM_023871	Set	chr2_29915515-29919516	TSS10794	476.155	585.601	450.3	1	0.298486	-0.0805446	-0.379031	1	0	0	1	2916
NM_153805	Pkn3	chr2_29932285-29936286	TSS10795	8.68159	7.72277	10.0401	1	-0.16882	0.20972	0.37854	1	0	0	2	2625
NM_146252	Tbc1d13	chr2_29987390-29991391	TSS10796	26.9988	26.8775	32.527	1	-0.00649609	0.268733	0.275229	1	0	0	1	2375
NM_007931	Endog	chr2_30025043-30029044	TSS10797	1.04594	1.67643	1.90886	1	0.680074	0.867288	0.187214	1	0	0	1	1300
NM_177725	Lrrc8a	chr2_30091288-30095289	TSS10798	5.18698	6.39908	5.36036	1	0.302917	0.0474261	-0.255491	1	0	0	1	2375
NM_172267	Phyhd1	chr2_30120048-30124049	TSS10799	3.29491	1.80641	3.65656	1	-0.866753	0.150205	1.01696	1	0	0	3	750
NM_019790	Tmeff2	chr1_50982366-50986367	TSS108	0.153437	0.139195	0.238374	1	-0.139584	0.632248	0.771832	2	3	1084	1	1850
NM_001134741	Tdrd5	chr1_158231479-158235480	TSS1080	1.12381	1.86522	1.25062	1	0.730438	0.154115	-0.576322	2	1	800	1	1050
NM_198304	Nup188	chr2_30139952-30143953	TSS10800	53.4086	56.0882	64.6267	1	0.0706239	0.275054	0.20443	1	0	0	2	2450
NM_175392	Fam73b	chr2_30217854-30221855	TSS10801	3.23699	3.00716	3.29595	1	-0.106217	0.0260335	0.132251	1	0	0	1	1775
NM_020329	Dolpp1	chr2_30245935-30249936	TSS10802	8.04116	7.66083	10.0169	1	-0.069894	0.316925	0.386819	1	0	0	1	1775
NM_138748	Ppp2r4	chr2_30269569-30273570	TSS10803	58.0343	57.8762	65.157	1	-0.00393556	0.167012	0.170947	1	0	0	1	2275
NM_030137	Cstad	chr2_30448563-30452564	TSS10804	0.363275	0.117652	0.200458	1	-1.61829	-0.854549	0.763743	1	0	0	1	1275
NM_170592	Mettl11a	chr2_30661496-30665497	TSS10805	16.4144	17.1847	18.4733	1	0.0661587	0.17047	0.104311	1	0	0	2	2750
NM_009116	Prrx2	chr2_30698886-30702887	TSS10806	2.2853	2.43321	3.44364	1	0.0904389	0.591338	0.5009	2	1	75	1	1300
NM_133673	Tor1b	chr2_30806520-30810521	TSS10807	8.31049	8.85692	9.01393	1	0.0918608	0.117209	0.0253483	1	0	0	2	1950
NM_028846	Usp20	chr2_30835798-30839799	TSS10808	2.29837	2.73721	3.00705	1	0.251994	0.38759	0.135595	1	0	0	1	1975
NM_178760	Gpr107	chr2_31005835-31009836	TSS10809	13.3811	12.7759	15.6112	1	-0.0667667	0.222369	0.289136	1	0	0	1	1700
NM_009230	Soat1	chr1_158402459-158406460	TSS1081	11.6369	10.3761	14.4207	1	-0.165427	0.30941	0.474838	1	0	0	2	1100
NM_019681	Ncs1	chr2_31099442-31103443	TSS10810	4.55996	5.08483	3.81154	1	0.157146	-0.258585	-0.415731	2	1	1733	1	2075
NM_007494	Ass1	chr2_31323789-31327790	TSS10811	49.4172	38.452	50.1742	1	-0.361946	0.021932	0.383878	1	0	0	1	2725
NM_001033389	Fubp3	chr2_31426244-31430245	TSS10812	43.8725	46.2488	28.2375	1	0.0760973	-0.635686	-0.711784	1	0	0	1	3020
NM_001123362	Prdm12	chr2_31493556-31497557	TSS10813	0.155374	0.0946509	0.0735243	1	-0.70915	-1.06922	-0.360068	2	1	4001	4	2001
NM_144886	Exosc2	chr2_31524256-31528257	TSS10814	38.6143	45.9638	42.231	1	0.251357	0.129164	-0.122193	1	0	0	2	1175
NM_001112703	Abl1	chr2_31542075-31546076	TSS10815	9.80751	8.98882	8.7973	1	-0.125742	-0.156809	-0.0310674	1	0	0	1	2000
NM_009594	Abl1	chr2_31613464-31617465	TSS10816	8.17539	8.08801	8.63369	1	-0.0155009	0.0786804	0.0941812	1	0	0	1	1900
NM_011836	Lamc3	chr2_31740800-31744801	TSS10817	0.0765366	0.0151055	0.0379734	1	-2.26732	-0.992388	1.27494	1	0	0	1	700
NM_145144	Aif1l	chr2_31803822-31807823	TSS10818	4.45981	4.86796	3.4387	1	0.126308	-0.375023	-0.501331	2	1	850	1	975
NM_172268	Nup214	chr2_31827969-31831970	TSS10819	16.6115	16.981	12.6404	1	0.0317372	-0.394113	-0.42585	1	0	0	1	1700
NM_023141	Tor3a	chr1_158602470-158606471	TSS1082	9.03406	10.0546	8.3394	1	0.154393	-0.115418	-0.269811	1	0	0	1	2050
NM_145521	Ppapdc3	chr2_31949170-31953171	TSS10820	0.730588	0.536083	0.0981821	1	-0.445886	-2.88288	-2.43699	1	0	0	1	800
NM_001159634	Prrc2b	chr2_32004667-32008668	TSS10821	49.1942	49.5297	58.9664	2	0.00980545	0.261399	0.251593	1	0	0	1	2843
NM_145145	Pomt1	chr2_32090202-32094203	TSS10822	10.0494	8.05616	14.3796	1	-0.31891	0.516871	0.835781	1	0	0	3	2525
NM_133852	Golga2	chr2_32141772-32145773	TSS10824	9.37017	8.70696	9.61425	2	-0.105894	0.0370944	0.142989	1	0	0	2	2725
NR_029811	Mir199b	chr2_32171979-32175980	TSS10825	0	0	0	1	0	0	0	1	0	0	1	925
NM_028412	Ciz1	chr2_32216717-32220718	TSS10826	5.12579	6.21454	6.6001	1	0.277824	0.364651	0.0868267	1	0	0	2	2108
NM_133783	Ptges2	chr2_32249409-32253410	TSS10827	5.82301	4.90581	7.7322	1	-0.247227	0.409053	0.65628	1	0	0	1	2550
NM_194335	Naif1	chr2_32303976-32307977	TSS10828	0.650462	0.670566	0.575835	1	0.0438482	-0.175522	-0.21937	1	0	0	2	1802
NM_153560	Fam102a	chr2_32388878-32392879	TSS10829	4.37774	4.63209	7.03366	1	0.0814589	0.683965	0.602506	1	0	0	1	3029
NM_145413	Fam20b	chr1_158647041-158651042	TSS1083	9.24914	8.11989	9.46551	1	-0.187837	0.0333574	0.221195	1	0	0	1	1650
NM_010073	Dpm2	chr2_32424377-32428378	TSS10830	8.98743	10.4462	10.5099	1	0.216975	0.225745	0.00876987	1	0	0	1	1200
NM_198191	Pip5kl1	chr2_32429338-32433339	TSS10831	1.15135	1.03467	0.656624	1	-0.154015	-0.809244	-0.65523	1	0	0	1	1250
NM_016973	St6galnac6	chr2_32460480-32464481	TSS10832	3.05307	3.84378	4.88626	3	0.332167	0.678294	0.346126	1	0	0	1	2581
NM_001025310	St6galnac6	chr2_32460480-32464481	TSS10834	3.10519	4.36971	5.32271	2	0.492723	0.777288	0.284565	1	0	0	1	2581
NM_021515	Ak1	chr2_32483019-32487020	TSS10835	23.3422	18.7038	18.539	1	-0.319594	-0.332361	-0.0127673	1	0	0	1	4001
NM_007932	Eng	chr2_32500114-32504115	TSS10836	5.55007	5.2041	5.1804	3	-0.0928403	-0.0994242	-0.00658392	1	0	0	1	2000
NM_152800	Tor2a	chr2_32610753-32614754	TSS10838	14.7323	12.2117	19.41	1	-0.270698	0.397794	0.668492	1	0	0	1	825
NM_178595	Ptrh1	chr2_32629340-32633341	TSS10839	7.74399	6.96472	10.525	1	-0.152991	0.442622	0.595613	1	0	0	1	1725
NM_001159965	Ralgps2	chr1_158867757-158871758	TSS1084	0.761926	0.481459	0	4	-0.661138	-9.5754	-8.91426	1	0	0	1	1850
NM_146119	Fam129b	chr2_32729653-32733654	TSS10840	25.503	23.8313	30.6611	1	-0.0978053	0.265733	0.363538	1	0	0	1	2804
NM_009076	Rpl12	chr2_32815231-32819232	TSS10841	862.726	709.371	1142.5	1	-0.282362	0.405219	0.687581	1	0	0	2	3301
NR_002898	Snora65	chr2_32816820-32820821	TSS10842	19.0602	12.4668	15.7395	1	-0.612432	-0.276158	0.336274	1	0	0	1	3630
NM_011923	Angptl2	chr2_33069480-33073481	TSS10843	3.75285	1.95526	3.009	1	-0.940273	-0.318608	0.621665	1	0	0	1	1125
NM_001163434	Hspa5	chr2_34625609-34629610	TSS10845	232.293	256.4	269.581	2	0.142447	0.21477	0.0723234	1	0	0	3	2160
NM_030021	D730039F16Rik	chr2_34727955-34731956	TSS10846	0.262909	0.255687	0.373433	1	-0.0400303	0.504667	0.544697	1	0	0	1	775
NM_012018	Cep110	chr2_34963011-34967012	TSS10847	8.5276	7.51933	7.40355	1	-0.181513	-0.203897	-0.0223839	1	0	0	1	1400
NM_146120	Gsn	chr2_35135899-35139900	TSS10848	9.83511	5.94268	12.5795	1	-0.726731	0.355029	1.08176	2	1	200	1	625
NM_001114125	Dab2ip	chr2_35411977-35415978	TSS10849	7.08894	5.12694	5.35636	2	-0.467394	-0.404251	0.0631429	1	0	0	1	800
NM_023884	Ralgps2	chr1_158867757-158871758	TSS1085	10.4552	10.6001	9.22915	7	0.01985	-0.179933	-0.199783	1	0	0	1	1850
NM_001114124	Dab2ip	chr2_35475500-35479501	TSS10850	2.44598	1.40309	1.84235	2	-0.801367	-0.408672	0.392695	1	0	0	2	2075
NM_001001602	Dab2ip	chr2_35545513-35549514	TSS10851	3.98651	4.95144	4.99625	2	0.312651	0.325646	0.0129949	1	0	0	1	675
NM_029309	Morn5	chr2_35902992-35906993	TSS10852	0	0	0	1	0	0	0	1	0	0	1	700
NM_026422	Mrrf	chr2_35989917-35993918	TSS10853	6.74424	7.38664	8.31316	1	0.131244	0.301701	0.170457	1	0	0	1	1100
NM_008969	Ptgs1	chr2_36083945-36087946	TSS10854	0.82792	0.630483	1.08219	1	-0.392489	0.385982	0.778471	1	0	0	1	700
NM_177644	Rasal2	chr1_159340726-159344727	TSS1087	2.4068	2.35214	1.98855	1	-0.0331284	-0.275273	-0.242145	1	0	0	1	1675
NM_146121	Rabgap1	chr2_37296804-37300805	TSS10876	14.9627	13.9398	13.8461	3	-0.10215	-0.111883	-0.00973342	1	0	0	2	1350
NM_001033960	Rabgap1	chr2_37305773-37309774	TSS10877	0.297078	0	0.483199	1	-8.21955	0.69991	8.91946	1	0	0	1	2050
NM_177383	Gpr21	chr2_37370145-37374146	TSS10878	0.0774601	0.17849	0.28251	1	1.19387	1.85337	0.659496	1	0	0	1	300
NM_001163566	Crb2	chr2_37629768-37633769	TSS10879	0.293583	0.416001	0.490371	1	0.501377	0.738139	0.236762	1	0	0	1	1150
NM_207583	Fam5b	chr1_160284391-160288392	TSS1088	0.108417	0.241122	0.0663572	1	1.1459	-0.699933	-1.84583	2	1	1100	1	1100
NM_010710	Lhx2	chr2_38204827-38208828	TSS10880	0.474926	0.409462	0.975751	1	-0.213489	1.03725	1.25074	2	2	3776	1	1900
NM_021606	Nek6	chr2_38365216-38369217	TSS10881	7.88027	6.77116	11.8825	1	-0.218812	0.59246	0.811272	1	0	0	1	1300
NM_001159631	Nek6	chr2_38365395-38369396	TSS10882	0	0.463403	0.255999	1	8.85923	8.00562	-0.853615	1	0	0	1	1300
NM_172854	Olfml2a	chr2_38785499-38789500	TSS10885	0.215468	0.422053	0.285436	1	0.966685	0.404059	-0.562626	1	0	0	1	875
NM_029687	Wdr38	chr2_38851828-38855829	TSS10886	0.0431962	0.12536	0.0530805	1	1.51555	0.291186	-1.22436	1	0	0	1	1350
NM_028809	Arpc5l	chr2_38861658-38865659	TSS10887	30.8265	32.7365	25.7418	1	0.0867263	-0.260049	-0.346775	1	0	0	2	2567
NM_001177394	Gm13476	chr2_44964657-44968658	TSS10890	0.10548	0	0.118471	1	-6.73444	0.166078	6.90052	2	5	1125	2	1593
NM_001177395	Gm13476	chr2_44965779-44969780	TSS10891	0	0.0575413	0	1	5.87138	0	-5.87138	2	5	1425	2	471
NM_007396	Acvr2a	chr2_48667628-48671629	TSS10892	4.27825	4.49132	3.97965	1	0.0701027	-0.104354	-0.174457	1	0	0	1	2225
NM_029924	Mbd5	chr2_48803027-48807028	TSS10893	1.21166	1.14198	1.17464	1	-0.085375	-0.0447288	0.0406462	1	0	0	2	1925
NM_172663	Epc2	chr2_49305005-49309006	TSS10894	10.3578	11.5204	7.14426	1	0.153459	-0.535798	-0.689258	1	0	0	1	2250
NM_008449	Kif5c	chr2_49472833-49476834	TSS10895	4.20211	4.57544	2.62768	1	0.122769	-0.677119	-0.799887	1	0	0	1	1675
NM_027990	Lypd6b	chr2_49641205-49645206	TSS10896	0.165388	0.28549	0.090009	1	0.783933	-0.87047	-1.6544	2	3	2306	1	1075
NR_033304	Lypd6	chr2_49919948-49923949	TSS10897	0.514326	0.468954	0.172311	2	-0.132965	-1.57212	-1.43915	2	1	100	1	1325
NM_009398	Tnfaip6	chr2_51891632-51895633	TSS10900	0.978183	0.85656	0.693772	1	-0.191341	-0.495039	-0.303698	1	0	0	1	375
NM_175238	Rif1	chr2_51926356-51930357	TSS10901	68.7992	75.7395	51.0971	1	0.138652	-0.429143	-0.567795	1	0	0	1	2900
NM_172409	Fmnl2	chr2_52714901-52718902	TSS10902	9.43976	8.69932	8.50377	1	-0.117835	-0.150631	-0.0327962	1	0	0	1	2325
NM_022989	Arl6ip6	chr2_53049117-53053118	TSS10903	27.519	32.8417	25.0593	1	0.255092	-0.135077	-0.390169	1	0	0	3	2408
NM_173030	Galnt13	chr2_54286797-54290798	TSS10904	0.197748	0.156148	0.299206	1	-0.338816	0.595012	0.933829	2	1	625	1	1850
NM_008426	Kcnj3	chr2_55287566-55291567	TSS10905	0.404504	1.24943	0.287297	1	1.62464	-0.49216	-2.1168	1	0	0	1	2575
NM_001145820	Gpd2	chr2_57088088-57092089	TSS10906	1.6467	4.32849	2.20071	1	1.39374	0.418171	-0.975573	1	0	0	1	2025
NM_010274	Gpd2	chr2_57088792-57092793	TSS10907	22.2227	19.4253	23.4744	1	-0.194088	0.0790507	0.273139	1	0	0	1	2025
NM_009786	Cacybp	chr1_162141023-162145024	TSS1091	162.058	154.753	156.559	1	-0.0665424	-0.0498035	0.016739	1	0	0	2	2327
NM_175464	Pkp4	chr2_58996906-59000907	TSS10910	24.5107	27.4017	19.1981	2	0.160848	-0.352433	-0.513281	1	0	0	1	2575
NM_198294	Tanc1	chr2_59448100-59452101	TSS10912	13.7999	12.9954	11.005	1	-0.0866503	-0.326472	-0.239822	1	0	0	1	2750
NM_020575	2016-03-08	chr2_60045992-60049993	TSS10913	34.0218	30.4464	30.9294	1	-0.160183	-0.137476	0.0227065	1	0	0	1	2225
NM_001164072	Tank	chr2_61429153-61433154	TSS10915	5.68096	5.62847	7.20682	2	-0.0133903	0.343174	0.356564	1	0	0	1	1100
NM_021526	Psmd14	chr2_61547750-61551751	TSS10916	66.3914	64.0052	63.715	1	-0.0528064	-0.0593624	-0.00655596	1	0	0	1	2350
NM_009322	Tbr1	chr2_61640509-61644510	TSS10917	0.0894997	0.115411	0.114307	1	0.363242	0.349495	-0.0137473	2	2	1835	1	875
NM_033552	Slc4a10	chr2_61882571-61886572	TSS10918	0.0244256	0.0555745	0.0077656	1	1.15387	-1.53636	-2.69023	1	0	0	1	525
NM_145523	Gca	chr2_62500383-62504384	TSS10919	13.6667	9.69729	10.0461	1	-0.494968	-0.443991	0.0509768	1	0	0	1	900
NM_001038621	Rabgap1l	chr1_162279702-162283703	TSS1092	1.52416	2.08914	1.54768	1	0.454639	0.0220785	-0.432561	1	0	0	1	250
NM_001099298	Scn2a1	chr2_65506501-65510502	TSS10920	0.0673816	0.0700902	0.0846088	1	0.0560425	0.324151	0.268108	1	0	0	1	225
NM_178634	Csrnp3	chr2_65681823-65685824	TSS10921	2.02826	3.21464	2.09399	2	0.664155	0.0459906	-0.618164	1	0	0	1	225
NR_033495	Gm13629	chr2_66276936-66280937	TSS10922	0.00759184	0.115559	0	1	3.76195	-3.10297	-6.86492	1	0	0	1	200
NM_172856	Lass6	chr2_68697613-68701614	TSS10928	5.00814	3.87095	6.56924	1	-0.371503	0.391383	0.762886	1	0	0	1	1675
NM_013862	Rabgap1l	chr1_162721069-162725070	TSS1093	1.67967	2.08214	2.22434	1	0.309723	0.404989	0.095266	1	0	0	1	1525
NM_028284	Bbs5	chr2_69483311-69487312	TSS10932	3.83565	4.28044	3.44407	1	0.158249	-0.155314	-0.313563	1	0	0	1	1025
NM_001081086	Ppig	chr2_69559144-69563145	TSS10934	42.5692	38.5491	28.6094	1	-0.143109	-0.573304	-0.430195	1	0	0	1	1700
NM_028521	Phospho2	chr2_69625793-69629794	TSS10935	5.84812	4.91131	6.24758	1	-0.251818	0.0953088	0.347127	1	0	0	1	925
NM_177784	Klhl23	chr2_69658426-69662427	TSS10936	1.56548	2.85115	1.71805	1	0.864524	0.134085	-0.730438	1	0	0	1	1375
NM_009278	Ssb	chr2_69697618-69701619	TSS10937	162.871	161.5	145.604	2	-0.0121918	-0.16168	-0.149488	1	0	0	1	1675
NM_177783	Ubr3	chr2_69733302-69737303	TSS10938	30.323	25.8687	37.5524	2	-0.229196	0.308484	0.537681	1	0	0	1	1625
NM_177376	Myo3b	chr2_69875182-69879183	TSS10939	0.0180147	0.0169993	0.0231943	1	-0.0791744	0.347552	0.426726	1	0	0	1	500
NM_022435	Sp5	chr2_70310979-70314980	TSS10940	1.40027	1.93748	1.44075	1	0.468191	0.0410861	-0.427105	2	2	3655	2	3230
NM_025744	4933404M02Rik	chr2_70344875-70348876	TSS10941	0.127869	0.145727	0.140835	1	0.187229	0.138308	-0.0489208	1	0	0	1	1175
NM_008077	Gad1	chr2_70398220-70402221	TSS10942	1.22433	2.31244	2.50361	1	0.916869	1.03142	0.114546	2	3	2946	1	2950
NR_027343	Gorasp2	chr2_70497565-70501566	TSS10943	29.4071	37.4514	33.7119	2	0.348846	0.197089	-0.151757	1	0	0	1	1725
NM_001165981	Dcaf17	chr2_70891800-70895801	TSS10944	12.6889	12.6272	9.72453	6	-0.00703901	-0.383833	-0.376794	1	0	0	2	1800
NM_028593	Cybrd1	chr2_70954110-70958111	TSS10945	0.742808	0.607196	0.359873	1	-0.290394	-1.04344	-0.753045	2	1	800	1	1125
NM_010064	Dync1i2	chr2_71048002-71052003	TSS10946	42.1675	37.7202	39.7541	1	-0.16079	-0.0850258	0.0757644	1	0	0	1	1050
NM_026115	Hat1	chr2_71225316-71229317	TSS10947	315.74	261.945	232.464	1	-0.269472	-0.441728	-0.172256	1	0	0	2	1925
NM_025633	Metap1d	chr2_71289394-71293395	TSS10948	4.82234	2.67395	3.2885	1	-0.850521	-0.552164	0.298356	1	0	0	1	850
NM_010053	Dlx1	chr2_71365501-71369502	TSS10949	0.142292	0.217888	0.222424	1	0.611235	0.640826	0.0295913	2	3	3276	1	1950
NM_173424	Zbtb37	chr1_162962390-162966391	TSS1095	1.21032	1.09368	1.03391	1	-0.146071	-0.227075	-0.0810039	1	0	0	1	2216
NM_008397	Itga6	chr2_71623139-71627140	TSS10950	43.4104	38.6321	45.1296	1	-0.168237	0.056032	0.224269	1	0	0	1	2100
NM_172665	Pdk1	chr2_71709328-71713329	TSS10951	50.9696	60.2574	37.3049	1	0.241497	-0.450262	-0.691759	1	0	0	3	1854
NM_019688	Rapgef4	chr2_71817271-71821272	TSS10952	0.21251	0.0887034	0.0971453	1	-1.25107	-1.12131	0.129757	2	3	425	1	925
NM_001164791	B230120H23Rik	chr2_72121757-72125758	TSS10953	6.74821	6.97734	8.2482	3	0.0481657	0.289536	0.24137	1	0	0	1	1075
NM_025866	Cdca7	chr2_72312275-72316276	TSS10954	47.6364	56.7418	54.1941	1	0.252343	0.186068	-0.0662749	1	0	0	2	2101
NM_001005343	Sp9	chr2_73107982-73111983	TSS10955	0.182123	0.2676	0.112208	1	0.552646	-0.693837	-1.24648	2	1	3943	3	2208
NM_029022	Scrn3	chr2_73148708-73152709	TSS10956	7.38403	6.44794	7.00675	1	-0.195542	-0.0756525	0.119889	1	0	0	1	1625
NM_008275	Hoxd13	chr2_74504366-74508367	TSS10957	0.665947	0.524995	0.767748	1	-0.342523	0.204939	0.547462	2	3	3026	1	1325
NM_008274	Hoxd12	chr2_74511086-74515087	TSS10958	0.0379245	0	0.0123348	1	-5.28261	-1.54548	3.73712	2	1	3637	2	764
NM_008273	Hoxd11	chr2_74518449-74522450	TSS10959	0	0.0504054	0.0990897	1	5.68385	6.64515	0.961302	2	4	2426	1	1500
NM_172644	Dars2	chr1_162998763-163002764	TSS1096	15.9607	18.8533	15.3642	1	0.240279	-0.0549478	-0.295227	1	0	0	1	2700
NM_013554	Hoxd10	chr2_74528004-74532005	TSS10960	0	0	0.119449	1	0	6.91228	6.91228	2	1	4001	2	1000
NM_013555	Hoxd9	chr2_74533819-74537820	TSS10961	0.536024	0.104041	0.734887	1	-2.35403	0.454498	2.80853	2	2	3751	2	1500
NM_008276	Hoxd8	chr2_74541545-74545546	TSS10962	0.760143	0.289577	0.726184	1	-1.38925	-0.0658471	1.3234	2	3	2651	1	1475
NM_010468	Hoxd3	chr2_74548049-74552050	TSS10963	0.0314535	0.0443789	0.0188645	1	0.483648	-0.708182	-1.19183	2	2	3701	1	800
NM_010469	Hoxd4	chr2_74558034-74562035	TSS10964	0.126308	0.0380568	0.202304	1	-1.70468	0.675316	2.37999	2	3	385	1	275
NR_029566	Mir10b	chr2_74562126-74566127	TSS10965	0	0	0	1	0	0	0	2	2	3726	1	675
NM_010467	Hoxd1	chr2_74599036-74603037	TSS10966	0.0618279	0.142907	0.299123	1	1.19566	2.25608	1.06042	2	5	2075	1	1225
NM_016804	Mtx2	chr2_74661868-74665869	TSS10967	17.8639	21.3276	21.7258	1	0.255661	0.282348	0.0266864	1	0	0	1	975
NR_033513	Gm6793	chr2_75495346-75499347	TSS10968	1502.8	2071.28	1625.71	8	0.462872	0.113418	-0.349453	1	0	0	2	2675
NM_172666	Agps	chr2_75668233-75672234	TSS10969	28.8226	27.1769	28	1	-0.0848166	-0.0417722	0.0430444	1	0	0	2	1525
NM_001039482	Klhl20	chr1_163059610-163063611	TSS1097	6.56051	5.66152	5.94642	1	-0.212584	-0.141764	0.0708197	1	0	0	1	850
NM_153405	Rbm45	chr2_76206040-76210041	TSS10970	14.4339	14.9734	13.0718	1	0.0529371	-0.142993	-0.19593	1	0	0	1	1425
NM_145525	Osbpl6	chr2_76242594-76246595	TSS10971	1.21829	1.19859	1.88585	1	-0.0234999	0.629938	0.653438	2	3	3081	1	1700
NM_001080711	Dfnb59	chr2_76486329-76490330	TSS10972	0.0435372	0	0	1	-5.47694	-5.47694	0	1	0	0	1	796
NM_031256	Plekha3	chr2_76511371-76515372	TSS10973	10.9983	11.0088	12.0362	1	0.00137655	0.130088	0.128712	1	0	0	2	2379
NM_009454	Ube2e3	chr2_78707203-78711204	TSS10975	20.1385	18.7336	14.8717	1	-0.104323	-0.437361	-0.333039	1	0	0	2	2425
NM_010576	Itga4	chr2_79093582-79097583	TSS10976	0.802723	0.758857	0.944567	1	-0.0809704	0.234481	0.315452	2	2	525	1	1100
NM_080558	Ssfa2	chr2_79473581-79477582	TSS10977	7.1116	7.27848	7.59714	1	0.0334584	0.0952693	0.0618109	1	0	0	1	1550
NM_024181	Dnajc10	chr2_80153622-80157623	TSS10979	23.3793	20.8349	22.8359	1	-0.166222	-0.0339266	0.132295	1	0	0	1	1000
NM_001195189	4930469G21Rik	chr1_163087445-163091446	TSS1098	0.0639868	0	0.0850342	1	-6.02207	0.404764	6.42684	1	0	0	1	250
NM_024438	Dusp19	chr2_80455370-80459371	TSS10980	4.84522	4.14376	6.19297	1	-0.225571	0.354004	0.579576	1	0	0	1	1275
NM_027091	Nup35	chr2_80476968-80480969	TSS10981	16.3698	14.8407	12.9505	1	-0.141468	-0.338006	-0.196537	1	0	0	1	1700
NM_001190179	Nup35	chr2_80477420-80481421	TSS10982	0.755737	0	0	1	-9.56365	-9.56365	0	1	0	0	1	1700
NM_175513	Zfp804a	chr2_81891814-81895815	TSS10983	0	0	0	1	0	0	0	2	2	1000	1	1475
NM_026934	Zc3h15	chr2_83482734-83486735	TSS10984	90.075	103.034	84.507	1	0.19392	-0.0920548	-0.285975	1	0	0	2	1525
NM_008402	Itgav	chr2_83562553-83566554	TSS10985	10.0005	8.46665	9.44299	1	-0.240183	-0.082748	0.157435	1	0	0	1	1825
NM_175514	Fam171b	chr2_83650884-83654885	TSS10986	1.21498	1.4359	1.09799	1	0.24084	-0.145941	-0.386781	1	0	0	1	850
NM_007453	Prdx6	chr1_163179297-163183298	TSS1099	84.8112	86.5229	100.839	1	0.0288269	0.249724	0.220897	1	0	0	2	2275
NM_001145100	Gm13718	chr2_84497235-84501236	TSS10994	0.730956	0.736693	0.648021	1	0.0112636	-0.173492	-0.184755	1	0	0	1	275
NM_025885	Med19	chr2_84516558-84520559	TSS10995	24.6517	23.7238	20.6354	1	-0.0553497	-0.256554	-0.201205	1	0	0	2	1500
NM_001005342	Ypel4	chr2_84572360-84576361	TSS10996	1.39074	0.84713	1.36457	1	-0.714532	-0.0273864	0.687146	1	0	0	1	975
NM_019949	Ube2l6	chr2_84636984-84640985	TSS10997	7.14148	5.47232	12.9986	1	-0.384009	0.86397	1.24798	1	0	0	1	1050
NM_013899	Timm10	chr2_84665177-84669178	TSS10998	14.7521	17.7003	17.0434	1	0.262837	0.20828	-0.0545575	1	0	0	1	1675
NM_001081349	Slc43a1	chr2_84677564-84681565	TSS10999	2.10754	2.83707	2.98348	1	0.428666	0.501235	0.0725694	1	0	0	2	2150
NM_175236	Adhfe1	chr1_9536126-9540127	TSS11	0.124765	0.273322	0.23848	2	1.12514	0.929174	-0.195965	1	0	0	2	1624
NM_011487	Stat4	chr1_52063087-52067088	TSS110	2.27014	1.67441	1.79649	1	-0.438902	-0.337433	0.10147	1	0	0	1	1500
NM_010177	Fasl	chr1_163716626-163720627	TSS1100	0	0	0.0209239	1	0	4.45443	4.45443	1	0	0	1	100
NM_024497	Slc43a1	chr2_84678479-84682480	TSS11000	1.58341	1.79499	1.93695	1	0.180834	0.290586	0.109752	1	0	0	2	2150
NM_001083809	Slc43a1	chr2_84678782-84682783	TSS11001	1.29006	1.17812	1.09899	1	-0.130845	-0.231066	-0.10022	1	0	0	1	2050
NM_021398	Slc43a3	chr2_84774802-84778803	TSS11002	2.51623	2.67698	2.21325	1	0.0893081	-0.185019	-0.274327	1	0	0	1	575
NM_182990	Ssrp1	chr2_84875357-84879358	TSS11005	91.2801	84.6026	76.2007	1	-0.109597	-0.260493	-0.150896	1	0	0	1	2150
NM_001136081	Ssrp1	chr2_84875607-84879608	TSS11006	30.1427	46.5934	33.3384	1	0.6283	0.145372	-0.482928	1	0	0	1	2150
NM_001081260	Tnks1bp1	chr2_84888616-84892617	TSS11007	10.9323	12.0738	10.9591	1	0.14327	0.00353205	-0.139738	1	0	0	3	1459
NM_172645	AI848100	chr1_163804792-163808793	TSS1101	16.0046	12.4079	14.202	1	-0.367202	-0.172381	0.19482	1	0	0	2	2843
NM_172646	Dnm3	chr1_164406165-164410166	TSS1102	0.0968776	0.0951717	0.089974	4	-0.0253658	-0.105523	-0.0801575	2	1	875	1	1350
NM_144877	Mettl13	chr1_164476476-164480477	TSS1103	8.21221	9.90762	9.17712	1	0.270738	0.160252	-0.110485	1	0	0	2	1299
NM_001081290	Prrc2c	chr1_164668687-164672688	TSS1105	61.3738	64.3483	45.3266	1	0.068278	-0.437257	-0.505535	1	0	0	1	1850
NM_021512	Nup160	chr2_90515371-90519372	TSS11087	31.5636	34.3406	33.8639	1	0.12165	0.101483	-0.0201665	1	0	0	1	547
NM_018828	Fnbp4	chr2_90583526-90587527	TSS11088	26.4956	28.2491	26.6502	1	0.0924487	0.00839325	-0.0840555	1	0	0	3	2152
NM_178755	Agbl2	chr2_90620900-90624901	TSS11089	0.230898	0.199147	0.10601	1	-0.21243	-1.11574	-0.903314	1	0	0	1	1125
NM_019758	Mtch2	chr2_90685311-90689312	TSS11090	55.2849	50.9472	62.2049	1	-0.11788	0.17014	0.28802	1	0	0	1	1525
NM_026161	C1qtnf4	chr2_90723942-90727943	TSS11091	0.463298	0.399745	0.71947	1	-0.212367	0.633887	0.846254	2	1	3193	1	825
NM_025991	Kbtbd4	chr2_90742942-90746943	TSS11092	6.12683	5.55439	6.55291	1	-0.141488	0.0969796	0.238468	1	0	0	1	1075
NM_017368	Celf1	chr2_90778553-90782554	TSS11093	59.7532	54.1891	40.4756	2	-0.141011	-0.561952	-0.420941	1	0	0	1	1425
NM_008948	Psmc3	chr2_90892172-90896173	TSS11095	68.6145	76.3836	59.274	1	0.154747	-0.211111	-0.365858	1	0	0	1	1750
NM_011355	Sfpi1	chr2_90934953-90938954	TSS11096	0.157015	0.186883	0.353065	1	0.249773	1.16395	0.91418	1	0	0	1	700
NM_007387	Acp2	chr2_91041068-91045069	TSS11098	3.33016	2.43005	2.58365	1	-0.454445	-0.366056	0.0883894	1	0	0	1	1525
NR_015464	A330069E16Rik	chr2_91075302-91079303	TSS11099	7.28225	6.49594	6.40042	1	-0.164822	-0.18619	-0.0213684	1	0	0	1	1675
NM_009283	Stat1	chr1_52174281-52178282	TSS111	3.13347	2.60367	4.50085	1	-0.267121	0.522296	0.789417	1	0	0	1	1650
NM_030880	Pacsin3	chr2_91094969-91098970	TSS11100	5.22436	7.05015	5.704	1	0.432328	0.126696	-0.305632	2	1	300	1	2550
NM_028733	Pacsin3	chr2_91095485-91099486	TSS11101	0.651574	0.258757	0.778266	1	-1.32898	0.255974	1.58495	2	1	300	1	2550
NM_001166024	Arfgap2	chr2_91103271-91107272	TSS11102	14.0124	13.9556	13.7474	2	-0.00586436	-0.0275433	-0.0216789	1	0	0	1	2000
NM_172668	Lrp4	chr2_91295687-91299688	TSS11103	3.00244	4.40393	2.70365	4	0.552503	-0.151174	-0.703677	1	0	0	1	2488
NR_027371	Arhgap1	chr2_91488274-91492275	TSS11106	10.3045	9.8355	13.3793	4	-0.0671993	0.376689	0.443889	1	0	0	2	2550
NM_146124	Arhgap1	chr2_91491364-91495365	TSS11107	0	0	0.683771	1	0	9.41948	9.41948	1	0	0	1	61
NM_178724	Harbi1	chr2_91549106-91553107	TSS11108	7.11537	7.19976	8.98411	1	0.0170077	0.336395	0.319387	1	0	0	2	2925
NM_172669	Ambra1	chr2_91568294-91572295	TSS11109	12.0532	12.2311	11.7177	2	0.0211314	-0.0407319	-0.0618633	1	0	0	1	950
NM_007699	Chrm4	chr2_91760345-91764346	TSS11110	0.837884	1.34516	0.5653	1	0.682307	-0.566905	-1.24921	2	1	1800	1	2771
NM_001109691	Phf21a	chr2_92023639-92027640	TSS11111	9.95579	11.3512	8.18857	5	0.189225	-0.281892	-0.471117	1	0	0	1	2936
NM_001109691	Phf21a	chr2_92023639-92027640	TSS11112	1.44338	1.29691	0.54242	2	-0.154256	-1.41031	-1.25605	1	0	0	1	2936
NR_028114	Pex16	chr2_92212832-92216833	TSS11115	4.2051	3.18714	3.1229	1	-0.399768	-0.429135	-0.0293667	1	0	0	3	2300
NM_145122	Pex16	chr2_92213395-92217396	TSS11116	2.01993	1.68567	2.66631	1	-0.260842	0.400366	0.661208	1	0	0	2	2125
NM_023850	Chst1	chr2_92437863-92441864	TSS11118	0.920506	1.28066	0.759103	1	0.475948	-0.277799	-0.753747	2	1	1850	2	1075
NM_030725	Syt13	chr2_92753257-92757258	TSS11119	1.58361	1.52431	1.19488	1	-0.0550253	-0.406055	-0.35103	1	0	0	1	625
NM_011127	Prrx1	chr1_165241781-165245782	TSS1112	4.862	2.88652	8.25799	3	-0.752012	0.764121	1.51613	2	1	3994	4	1425
NM_001025246	Trp53i11	chr2_93025740-93029741	TSS11120	11.7364	13.9694	19.6507	1	0.25126	0.743541	0.492281	2	1	175	1	2150
NM_007442	Alx4	chr2_93480590-93484591	TSS11121	0.141451	0.129409	0.0855307	1	-0.127422	-0.719182	-0.591759	2	2	3701	1	1250
NR_027831	2810002D19Rik	chr2_94244863-94248864	TSS11122	1.87269	1.63227	1.46909	1	-0.198119	-0.349978	-0.151859	1	0	0	1	2300
NM_178725	Lrrc4c	chr2_97305830-97309831	TSS11123	0	0	0.0250611	1	0	4.70383	4.70383	2	1	100	1	1225
NM_009424	Traf6	chr2_101516596-101520597	TSS11125	5.3098	5.88651	4.71271	1	0.148728	-0.172066	-0.320795	1	0	0	1	1425
NM_029635	Commd9	chr2_101724418-101728419	TSS11126	9.96024	8.22325	8.03115	1	-0.276441	-0.310539	-0.0340979	1	0	0	1	725
NM_173749	Pamr1	chr2_102388177-102392178	TSS11127	0.0188187	0.0534294	0.0702618	1	1.45752	1.84627	0.388743	1	0	0	1	825
NM_001077514	Slc1a2	chr2_102496839-102500840	TSS11128	0	8.36e-07	4.1e-07	3	0.00120559	0.000591384	-0.000614205	2	3	1300	1	1500
NM_178883	Gorab	chr1_165331772-165335773	TSS1113	6.56232	5.9987	7.34423	1	-0.129535	0.162382	0.291917	1	0	0	1	1225
NM_019735	Apip	chr2_102911831-102915832	TSS11130	7.4507	8.67492	8.64794	1	0.219447	0.214954	-0.00449342	1	0	0	1	1225
NM_178890	Abtb2	chr2_103404466-103408467	TSS11133	1.51585	1.63561	2.06788	1	0.109632	0.447772	0.338139	2	1	1492	2	2350
NM_001142336	Lmo2	chr2_103807713-103811714	TSS11135	0	0	0	1	0	0	0	2	2	1789	1	1975
NM_008505	Lmo2	chr2_103808443-103812444	TSS11136	0.8964	1.3994	1.10831	2	0.642016	0.305833	-0.336183	2	2	2519	1	1975
NM_020593	Fbxo3	chr2_103865955-103869956	TSS11137	14.0855	14.612	18.3873	2	0.0529332	0.384472	0.331539	1	0	0	1	1275
NM_181858	Cd59b	chr2_103909166-103913167	TSS11138	1.5123	1.21669	1.78051	1	-0.313551	0.235403	0.548954	1	0	0	2	975
NM_007652	Cd59a	chr2_103933957-103937958	TSS11139	5.15894	3.38612	3.70285	2	-0.607295	-0.478329	0.128967	1	0	0	1	925
NM_026634	A930018P22Rik	chr2_103960925-103964926	TSS11140	0.15391	0	0.0841459	1	-7.27529	-0.863421	6.41187	1	0	0	1	1000
NM_145529	Cstf3	chr2_104428640-104432641	TSS11141	23.9657	26.0801	16.6897	3	0.121972	-0.521989	-0.64396	1	0	0	2	2600
NM_177600	Ccdc73	chr2_104724480-104728481	TSS11142	0.935024	0.624794	0.4639	1	-0.580858	-1.00963	-0.428767	1	0	0	1	600
NM_144783	Wt1	chr2_104964685-104968686	TSS11143	0.510835	0.806252	0.487189	1	0.65734	-0.068239	-0.725579	2	5	2451	2	2625
NM_001159638	0610012H03Rik	chr2_105062498-105066499	TSS11144	0.2494	0.308215	0.0301402	2	0.304377	-3.00738	-3.31176	1	0	0	1	850
NM_013627	Pax6	chr2_105514285-105518286	TSS11145	4.17611	4.49963	2.81005	1	0.107622	-0.571396	-0.679018	2	2	1740	2	2575
NM_028260	Immp1l	chr2_105742794-105746795	TSS11146	18.119	12.1324	15.5639	1	-0.578599	-0.219287	0.359312	1	0	0	1	1200
NM_001143683	Mpped2	chr2_106531615-106535616	TSS11147	1.41985	1.07738	0.413815	1	-0.397889	-1.77621	-1.37833	1	0	0	1	2991
NM_029837	Mpped2	chr2_106533757-106537758	TSS11148	1.98816e-05	0.168714	0	1	7.37856	-0.0284017	-7.40696	1	0	0	1	2418
NM_021275	Kcna4	chr2_107128745-107132746	TSS11149	0.0588864	0.0866992	0.155945	1	0.550335	1.38996	0.839623	1	0	0	1	1175
NM_201364	BC055324	chr1_165922912-165926913	TSS1115	21.0464	19.8837	16.6612	1	-0.0819832	-0.337063	-0.25508	1	0	0	1	1500
NM_139303	Kif18a	chr2_109118894-109122895	TSS11150	13.8138	10.8827	16.7113	1	-0.344046	0.274696	0.618741	1	0	0	1	1200
NM_007540	Bdnf	chr2_109512856-109516857	TSS11151	0.17927	0	0.0593189	1	-7.49402	-1.57948	5.91454	2	2	1575	2	2200
NM_001048139	Bdnf	chr2_109514053-109518054	TSS11152	0.225654	0.124815	0	1	-0.849188	-7.82435	-6.97516	2	2	1575	3	2576
NM_001048141	Bdnf	chr2_109530592-109534593	TSS11153	0.194121	0	0.408826	1	-7.60823	1.07064	8.67887	2	4	493	2	1843
NM_001048142	Bdnf	chr2_109531719-109535720	TSS11154	1.41868	1.51031	3.10322	1	0.0902338	1.12867	1.03843	2	4	650	2	2675
NM_011699	Lin7c	chr2_109729034-109733035	TSS11155	53.7701	50.8427	54.2645	1	-0.080762	0.0132043	0.0939663	1	0	0	1	1350
NM_172671	Lgr4	chr2_109755803-109759804	TSS11156	20.3208	20.0036	18.0569	1	-0.0226964	-0.170398	-0.147702	1	0	0	1	2779
NM_026613	Ccdc34	chr2_109855973-109859974	TSS11157	23.3822	20.9568	20.0089	1	-0.157985	-0.224758	-0.0667733	1	0	0	1	1025
NM_001160208	Blzf1	chr1_166235615-166239616	TSS1116	10.3506	9.57431	8.20369	3	-0.112462	-0.335332	-0.22287	1	0	0	1	1525
NM_009721	Atp1b1	chr1_166386486-166390487	TSS1117	40.2864	40.7712	54.4879	1	0.0172571	0.435634	0.418377	1	0	0	1	3014
NM_207206	Lpcat4	chr2_112077997-112081998	TSS11176	7.13286	8.69335	9.23995	1	0.285395	0.373358	0.087963	1	0	0	1	1825
NM_025403	Nop10	chr2_112100125-112104126	TSS11177	109.216	119.2	114.514	1	0.126199	0.0683392	-0.0578598	1	0	0	1	1475
NM_133649	Slc12a6	chr2_112104470-112108471	TSS11178	2.74439	2.32564	1.56666	1	-0.238763	-0.808398	-0.569635	1	0	0	2	1825
NM_133648	Slc12a6	chr2_112122844-112126845	TSS11179	4.38861	3.34101	5.06277	1	-0.393377	0.206119	0.599496	1	0	0	1	600
NM_024254	2410042D21Rik	chr2_112217367-112221368	TSS11180	17.4373	20.7492	17.5736	1	0.250866	0.0112325	-0.239633	1	0	0	4	2033
NM_133749	2900064A13Rik	chr2_112293181-112297182	TSS11181	17.6274	21.9574	25.1265	1	0.316871	0.511366	0.194494	1	0	0	1	1225
NM_028844	Aven	chr2_112331120-112335121	TSS11182	8.55358	12.3844	11.167	1	0.533872	0.384602	-0.14927	1	0	0	2	1550
NM_001043322	Fmn1	chr2_113165892-113169893	TSS11185	0.780551	0.921262	0.858333	2	0.238837	0.136877	-0.101959	2	1	50	1	950
NR_028423	A530058N18Rik	chr2_113837300-113841301	TSS11186	0	0	0	1	0	0	0	2	1	1800	1	1375
NM_001145898	BC052040	chr2_115405451-115409452	TSS11188	12.6537	11.4624	13.7857	2	-0.142636	0.123606	0.266241	1	0	0	2	1599
NM_026104	Tmco5	chr2_116702426-116706427	TSS11190	0	0	0	1	0	0	0	1	0	0	1	275
NM_033524	Spred1	chr2_116945185-116949186	TSS11191	25.6933	29.7831	28.1528	1	0.213094	0.131881	-0.0812127	1	0	0	2	3440
NM_026620	Fam98b	chr2_117073474-117077475	TSS11193	17.4805	24.2164	18.7961	1	0.470215	0.104681	-0.365534	1	0	0	1	1125
NM_011580	Thbs1	chr2_117935657-117939658	TSS11194	16.7839	11.5724	24.877	1	-0.536351	0.567707	1.10406	1	0	0	3	1900
NM_013719	Eif2ak4	chr2_118212352-118216353	TSS11195	5.9632	7.02527	6.21835	1	0.23643	0.0604352	-0.175995	1	0	0	1	775
NM_001177806	Eif2ak4	chr2_118212847-118216848	TSS11196	1.52911	0.000698008	0.828494	1	-9.81558	-0.883332	8.93224	1	0	0	1	775
NM_009773	Bub1b	chr2_118421946-118425947	TSS11197	82.6767	85.7624	80.9305	1	0.0528638	-0.0307969	-0.0836608	1	0	0	1	1275
NM_001033254	Pak6	chr2_118487312-118491313	TSS11198	0.0809059	0.28316	0.539452	1	1.79466	2.72213	0.927463	1	0	0	1	1475
NM_001145854	Pak6	chr2_118500981-118504982	TSS11199	0.684512	0.640618	0.328001	1	-0.0954673	-1.05909	-0.963623	2	2	2025	1	1175
NR_024590	Tmem194b	chr1_52685548-52689549	TSS112	6.67439	5.22203	8.18428	2	-0.353964	0.29418	0.648144	1	0	0	1	675
NM_145512	Sft2d2	chr1_167122564-167126565	TSS1120	11.4028	9.83279	18.9584	1	-0.213695	0.733399	0.947094	1	0	0	1	1425
NR_030716	5430417L22Rik	chr2_118569497-118573498	TSS11200	0.6884	0.582922	0.859828	1	-0.239566	0.320384	0.559949	2	3	2348	1	1825
NM_170593	Disp2	chr2_118603454-118607455	TSS11202	0.0633636	0.0614293	0.0662597	1	-0.0440217	0.0634973	0.107519	1	0	0	1	850
NM_026412	D2Ertd750e	chr2_118637738-118641739	TSS11203	25.0701	21.1484	19.3817	1	-0.245409	-0.371256	-0.125847	1	0	0	2	1225
NM_019826	Ivd	chr2_118685735-118689736	TSS11204	13.3584	10.2089	12.7817	1	-0.387886	-0.0636626	0.324224	1	0	0	1	750
NM_001045523	Bahd1	chr2_118725350-118729351	TSS11205	3.85808	3.31888	4.6236	1	-0.217126	0.261072	0.478197	2	3	2376	1	3125
NM_028117	Chst14	chr2_118750232-118754233	TSS11206	1.38515	1.268	1.68406	1	-0.127391	0.281717	0.409108	1	0	0	1	1175
NM_173450	Rpusd2	chr2_118858525-118862526	TSS11207	4.97256	5.17161	5.41701	1	0.0566135	0.123484	0.0668706	1	0	0	1	1100
NM_029617	Casc5	chr2_118870854-118874855	TSS11208	16.4232	12.8172	15.1097	1	-0.357629	-0.120253	0.237377	1	0	0	1	1250
NM_011234	Rad51	chr2_118936552-118940553	TSS11209	50.7685	51.6433	48.5265	1	0.0246471	-0.0651595	-0.0898066	1	0	0	1	2075
NM_145513	Tiprl	chr1_167165089-167169090	TSS1121	10.5846	10.8011	15.1171	1	0.0292088	0.514174	0.484965	1	0	0	1	2275
NM_177157	Gchfr	chr2_118991523-118995524	TSS11210	1.96478	2.4127	1.4299	1	0.296145	-0.458179	-0.754324	1	0	0	1	1375
NM_001164827	Zfyve19	chr2_119032455-119036456	TSS11212	3.11733	2.20206	2.58671	2	-0.501265	-0.2691	0.232165	1	0	0	1	1575
NM_016907	Spint1	chr2_119061095-119065096	TSS11213	17.6361	12.5096	19.9347	1	-0.495462	0.176741	0.672203	1	0	0	1	2450
NM_172269	Vps18	chr2_119112477-119116478	TSS11214	8.06409	7.28861	9.28802	1	-0.145849	0.203836	0.349685	1	0	0	1	1400
NM_019454	Dll4	chr2_119149519-119153520	TSS11215	0.0444909	0.12921	0.0179973	1	1.51719	-1.25978	-2.77697	2	3	3451	1	3550
NM_026929	Chac1	chr2_119174977-119178978	TSS11216	15.3273	21.8555	24.6471	1	0.511865	0.685279	0.173414	1	0	0	2	2628
NM_019769	1500003O03Rik	chr2_119371442-119375443	TSS11217	22.558	19.8585	21.8512	1	-0.183874	-0.0459246	0.137949	1	0	0	1	1425
NR_015473	1700020I14Rik	chr2_119418031-119422032	TSS11218	15.036	14.2676	14.5801	2	-0.075665	-0.0444123	0.0312527	1	0	0	1	925
NM_133851	Nusap1	chr2_119442033-119446034	TSS11219	44.123	40.3636	39.662	2	-0.128473	-0.153771	-0.0252979	1	0	0	3	1725
NM_028759	Dcaf6	chr1_167388594-167392595	TSS1122	5.20924	4.97629	5.62707	1	-0.0659894	0.11129	0.17728	1	0	0	1	2800
NM_030112	Rtf1	chr2_119498803-119502804	TSS11220	20.1094	19.3611	16.021	1	-0.0547063	-0.327888	-0.273181	1	0	0	1	1600
NM_146125	Itpka	chr2_119566072-119570073	TSS11221	3.13959	2.3727	2.26358	1	-0.403898	-0.471792	-0.0678941	2	1	1748	2	2723
NM_019392	Tyro3	chr2_119623249-119627250	TSS11222	12.15	10.9593	10.1312	1	-0.148788	-0.262128	-0.11334	1	0	0	1	2100
NM_001164274	Mga	chr2_119720963-119724964	TSS11223	28.1344	23.7629	26.533	2	-0.243615	-0.0845448	0.15907	1	0	0	1	1775
NM_011941	Mapkbp1	chr2_119796434-119800435	TSS11224	4.86562	4.90768	3.97611	1	0.012415	-0.2912	-0.303615	1	0	0	1	900
NM_001114637	Jmjd7	chr2_119851218-119855219	TSS11225	7.29472	7.26115	9.22499	1	-0.00665363	0.338653	0.345307	1	0	0	1	1450
NM_172672	Ganc	chr2_120227631-120231632	TSS11227	1.0079	0.897578	0.910981	1	-0.167068	-0.145708	0.02136	1	0	0	2	1850
NM_001109761	Capn3	chr2_120300644-120304645	TSS11229	0.239241	0.222185	0.0651706	1	-0.106242	-1.86022	-1.75398	1	0	0	1	1275
NM_001001880	Mpzl1	chr1_167562672-167566673	TSS1123	29.3197	26.342	35.5315	2	-0.1545	0.27722	0.43172	1	0	0	1	2000
NM_009222	Snap23	chr2_120391406-120395407	TSS11230	20.8071	21.4077	23.9822	3	0.0410483	0.204876	0.163828	1	0	0	1	1025
NM_025475	Haus2	chr2_120433171-120437172	TSS11231	14.623	12.7521	14.9271	1	-0.19749	0.0296926	0.227183	1	0	0	1	1650
NM_175285	Tmem62	chr2_120800797-120804798	TSS11232	0.337916	0.455195	0.490219	1	0.428723	0.535439	0.106716	1	0	0	1	1100
NM_010761	Ccndbp1	chr2_120832143-120836144	TSS11233	11.6718	12.0416	9.557	1	0.0449962	-0.28837	-0.333366	1	0	0	1	1200
NM_029475	Adal	chr2_120965876-120969877	TSS11234	3.32478	3.5213	4.37059	1	0.0828251	0.394465	0.31164	1	0	0	2	799
NM_153387	Tubgcp4	chr2_120994941-120998942	TSS11235	9.45109	9.02346	8.11176	1	-0.0667928	-0.220441	-0.153648	1	0	0	3	1750
NM_032393	Mtap1a	chr2_121113337-121117338	TSS11236	1.29548	0.687244	1.04595	1	-0.913608	-0.308407	0.605201	1	0	0	1	1475
NM_001173506	Mtap1a	chr2_121119189-121123190	TSS11237	2.95304	4.04085	2.57189	1	0.452326	-0.1993	-0.651626	1	0	0	1	3050
NM_009897	Ckmt1	chr2_121182376-121186377	TSS11238	7.86821	8.1267	9.66124	1	0.0466283	0.296139	0.249511	1	0	0	1	1700
NM_007952	Pdia3	chr2_121237637-121241638	TSS11239	161.798	143.687	165.12	1	-0.171263	0.0293209	0.200584	1	0	0	1	1900
NM_178593	Rcsd1	chr1_167636225-167640226	TSS1124	0.235234	0.340018	0.218876	2	0.529632	-0.103523	-0.633155	2	2	600	1	1000
NM_011354	Serf2	chr2_121272963-121276964	TSS11240	57.8878	55.7461	62.9308	1	-0.0543875	0.120505	0.174892	1	0	0	2	2075
NM_026318	2310003F16Rik	chr2_121280823-121284824	TSS11241	134.667	124.742	109.319	1	-0.110448	-0.30085	-0.190401	1	0	0	1	1300
NM_030234	Wdr76	chr2_121330458-121334459	TSS11242	18.8757	14.5783	18.8001	1	-0.372685	-0.0057895	0.366896	1	0	0	2	1425
NM_177054	Casc4	chr2_121690705-121694706	TSS11243	16.1314	14.9928	13.8995	2	-0.105602	-0.214827	-0.109225	1	0	0	1	1975
NM_212450	Ctdspl2	chr2_121780188-121784189	TSS11244	17.9591	17.9214	17.393	1	-0.00303154	-0.0462056	-0.0431741	1	0	0	4	1914
NM_144545	Eif3j	chr2_121852358-121856359	TSS11245	94.5165	99.7365	74.4821	1	0.0775546	-0.343668	-0.421223	1	0	0	1	1975
NM_009735	B2m	chr2_121971422-121975423	TSS11246	22.8215	13.8966	34.6815	1	-0.715621	0.603751	1.31937	2	2	675	1	1150
NM_028914	4933406J08Rik	chr2_122010007-122014008	TSS11248	0.329752	0.384977	0.194489	1	0.222765	-0.758662	-0.981427	1	0	0	1	450
NM_146126	Sord	chr2_122058574-122062575	TSS11249	17.7439	13.134	23.9401	1	-0.433988	0.432085	0.866073	1	0	0	1	1400
NM_025777	Duoxa2	chr2_122122635-122126636	TSS11250	0	0	0	1	0	0	0	2	2	3350	2	1075
NM_001099297	Duox1	chr2_122139407-122143408	TSS11251	0.150182	0.249842	0.147837	1	0.730493	-0.0225532	-0.753046	2	1	843	1	418
NM_001004174	AA467197	chr2_122461622-122465623	TSS11254	2.49128	0.792462	1.95246	1	-1.65123	-0.351434	1.2998	2	1	75	1	400
NR_030547	Mir147	chr2_122464538-122468539	TSS11255	0	0	0	1	0	0	0	-1	1	75	0	0
NM_019788	Pldn	chr2_122562240-122566241	TSS11256	8.03682	5.7108	7.72779	1	-0.492859	-0.0565617	0.436297	1	0	0	1	1000
NM_001162503	Sqrdl	chr2_122589094-122593095	TSS11257	3.74896e-05	2.45568e-05	1.15738	1	-0.0180969	10.1248	10.1429	2	1	75	1	775
NM_198932	Pou2f1	chr1_167930765-167934766	TSS1126	9.28913	9.2541	6.23497	2	-0.00544959	-0.575084	-0.569635	1	0	0	1	3210
NM_199241	Sema6d	chr2_124434031-124438032	TSS11260	0.148466	0.202433	0.102803	5	0.444734	-0.525972	-0.970706	2	3	675	1	1500
NM_175034	Slc24a5	chr2_124891862-124895863	TSS11261	0.78373	0.838988	0.400947	1	0.0981724	-0.965191	-1.06336	1	0	0	1	50
NM_001162934	Ctxn2	chr2_124960427-124964428	TSS11262	0	0	0	1	0	0	0	1	0	0	1	725
NM_001079690	Slc12a1	chr2_124976335-124980336	TSS11263	0.0133254	0	0	2	-3.8405	-3.8405	0	1	0	0	1	250
NM_001159646	Dut	chr2_125070983-125074984	TSS11264	36.9745	34.3854	17.2921	1	-0.104732	-1.09637	-0.991642	1	0	0	2	2100
NM_023595	Dut	chr2_125071250-125075251	TSS11265	15.7415	24.9359	26.3467	1	0.663617	0.743012	0.0793949	1	0	0	2	2100
NM_025613	Eid1	chr2_125496835-125500836	TSS11266	5.99256	4.55321	6.25533	1	-0.396212	0.0619034	0.458116	1	0	0	1	1075
NM_175154	Galk2	chr2_125682953-125686954	TSS11267	5.4069	5.25806	4.67344	1	-0.0402635	-0.210275	-0.170011	1	0	0	1	1150
NM_026981	Dtwd1	chr2_125975876-125979877	TSS11269	5.46495	6.10546	7.74901	1	0.159864	0.503726	0.343862	1	0	0	1	800
NM_001160049	Dusp27	chr1_168056029-168060030	TSS1127	4.84755	3.30617	0.985886	2	-0.551957	-2.2966	-1.74464	1	0	0	1	2250
NM_011978	Slc27a2	chr2_126376759-126380760	TSS11270	3.01644	5.21176	1.64705	1	0.788722	-0.872565	-1.66129	1	0	0	2	2050
NM_019729	Usp8	chr2_126531063-126535064	TSS11271	26.3803	26.233	25.1886	1	-0.00807786	-0.0666874	-0.0586096	1	0	0	1	925
NM_175550	Ap4e1	chr2_126832446-126836447	TSS11272	6.37225	6.24427	5.39753	1	-0.0292653	-0.239463	-0.210197	1	0	0	1	950
NM_026678	Blvra	chr2_126894392-126898393	TSS11273	3.97214	3.55876	4.12169	1	-0.1585	0.0533064	0.211806	1	0	0	1	1325
NM_177214	Snrnp200	chr2_127032139-127036140	TSS11274	58.7859	58.8818	54.8052	1	0.00235157	-0.101156	-0.103507	1	0	0	1	1975
NM_175145	Tmem127	chr2_127071710-127075711	TSS11275	7.66572	7.52138	7.31164	1	-0.0274203	-0.0682172	-0.0407968	1	0	0	1	2075
NM_139308	Stard7	chr2_127093964-127097965	TSS11276	18.0878	20.7217	17.4838	1	0.196115	-0.0489954	-0.245111	1	0	0	1	1950
NM_010090	Dusp2	chr2_127159894-127163895	TSS11277	0.851486	1.21271	1.00972	1	0.509676	0.245635	-0.26404	1	0	0	2	1425
NM_172539	Astl	chr2_127162374-127166375	TSS11278	0	0.0240398	0.0157141	1	4.64615	4.06299	-0.583157	1	0	0	1	326
NM_009633	Adra2b	chr2_127187021-127191022	TSS11279	0.362688	0.408553	0.822018	1	0.171349	1.17822	1.00687	2	1	2000	2	1750
NM_175296	Mael	chr1_168166875-168170876	TSS1128	3.1575	4.22451	4.59379	1	0.419886	0.540759	0.120873	1	0	0	1	675
NM_001081089	Gpat2	chr2_127248934-127252935	TSS11280	1.27366	1.07499	0.84944	1	-0.244448	-0.583831	-0.339383	1	0	0	1	550
NM_029963	Mrps5	chr2_127411161-127415162	TSS11281	48.1033	47.2062	43.0529	1	-0.0271589	-0.160022	-0.132863	1	0	0	2	2175
NM_009754	Bcl2l11	chr2_127949773-127953774	TSS11283	11.3971	11.4597	9.67296	3	0.00789596	-0.236621	-0.244517	2	1	77	1	4001
NM_008587	Mertk	chr2_128522732-128526733	TSS11284	1.84631	1.69827	3.6791	1	-0.120511	0.994319	1.11483	1	0	0	2	1700
NM_028248	Tmem87b	chr2_128642038-128646039	TSS11285	11.745	9.58711	12.7752	1	-0.292851	0.121289	0.41414	1	0	0	1	1825
NM_024237	Fbln7	chr2_128687667-128691668	TSS11286	0.262248	0.409196	0.251728	1	0.639891	-0.0588371	-0.698728	1	0	0	1	875
NM_178404	Zc3h6	chr2_128791137-128795138	TSS11287	3.83856	2.01125	4.79604	1	-0.932131	0.321203	1.25333	1	0	0	1	1550
NM_027192	Ttl	chr2_128889682-128893683	TSS11288	3.58573	3.87415	3.84335	1	0.111583	0.100071	-0.0115125	1	0	0	1	1775
NM_009086	Polr1b	chr2_128924731-128928732	TSS11289	23.3393	25.5888	18.1294	1	0.132746	-0.364412	-0.497158	1	0	0	1	1550
NM_175170	Pogk	chr1_168337959-168341960	TSS1129	0.641532	0.646725	0.476874	2	0.0116131	-0.427138	-0.438751	2	3	2200	1	1050
NM_025395	Chchd5	chr2_128953435-128957436	TSS11290	9.41791	7.37109	12.648	1	-0.353486	0.425391	0.778878	1	0	0	1	2525
NM_015747	Slc20a1	chr2_129022508-129026509	TSS11291	96.3966	90.7006	104.505	2	-0.0878692	0.116511	0.20438	1	0	0	1	2600
NM_001177646	Sirpa	chr2_129416574-129420575	TSS11293	2.60203	0.467917	1.23808	3	-2.47279	-1.07092	1.40187	1	0	0	1	2100
NM_001177647	Sirpa	chr2_129416930-129420931	TSS11294	0.786119	1.74158	1.58937	2	1.14657	1.01471	-0.131862	1	0	0	1	2100
NM_183262	Stk35	chr2_129624252-129628253	TSS11295	12.6549	10.838	7.29308	2	-0.22357	-0.795009	-0.571439	1	0	0	1	2603
NM_009374	Tgm3	chr2_129836109-129840110	TSS11296	0.463264	0.176896	0.712407	1	-1.38391	0.61978	2.00369	1	0	0	1	300
NM_001033197	AU015228	chr2_129924129-129928130	TSS11297	1.22247	0.956819	1.08055	1	-0.353154	-0.177878	0.175275	1	0	0	1	150
NM_146108	Hibch	chr1_52899889-52903890	TSS113	8.78979	10.4539	10.9645	1	0.250115	0.318907	0.0687923	1	0	0	1	950
NM_024193	Nop56	chr2_130098147-130102148	TSS11300	186.626	201.28	167.185	1	0.109053	-0.158704	-0.267757	1	0	0	2	2948
NR_028547	Snord110	chr2_130099250-130103251	TSS11301	4.91422	4.48254	0	1	-0.132618	-12.263	-12.1304	1	0	0	1	4001
NR_028528	Snord57	chr2_130101761-130105762	TSS11302	11.3859	29.7001	4.91536	1	1.38314	-1.21171	-2.59485	1	0	0	2	1964
NM_001110513	Ebf4	chr2_130119674-130123675	TSS11303	0.541184	0.335815	0.380287	1	-0.686826	-0.507905	0.178921	2	2	3226	1	1900
NM_030559	Vps16	chr2_130248055-130252056	TSS11306	21.1191	23.7063	17.6407	1	0.166715	-0.259627	-0.426342	1	0	0	2	1900
NM_001163688	Ptpra	chr2_130274013-130278014	TSS11307	11.8508	12.0311	12.8974	2	0.0217823	0.122086	0.100304	1	0	0	1	1550
NM_207207	Mrps26	chr2_130387492-130391493	TSS11308	12.7001	14.343	16.0688	1	0.175494	0.339399	0.163905	1	0	0	1	1525
NM_011025	Oxt	chr2_130399908-130403909	TSS11309	0.0555408	0.31032	0.180598	1	2.46103	1.68338	-0.77765	2	1	1475	1	1000
NM_025922	Itpa	chr2_130491576-130495577	TSS11310	39.7524	40.4703	35.1459	1	0.0258209	-0.177681	-0.203502	1	0	0	2	1650
NM_009730	Atrn	chr2_130730231-130734232	TSS11311	3.0195	1.76388	2.96905	1	-0.775217	-0.0243002	0.750917	1	0	0	1	1700
NM_028306	Hspa12b	chr2_130951147-130955148	TSS11312	0.53813	0.519534	1.03733	1	-0.0506408	0.94556	0.996201	1	0	0	1	850
NM_001111075	Cdc25b	chr2_131010683-131014684	TSS11313	11.77	11.3869	11.0344	2	-0.0477363	-0.0931029	-0.0453666	1	0	0	1	1575
NM_027129	2310035K24Rik	chr2_131034175-131038176	TSS11314	1.74031	1.91173	3.54138	1	0.13546	1.02455	0.889086	1	0	0	1	1575
NM_144888	Mavs	chr2_131057798-131061799	TSS11315	5.58811	4.41201	6.22753	1	-0.340856	0.156273	0.497129	1	0	0	1	1650
NM_153501	Pank2	chr2_131086235-131090236	TSS11316	18.7961	18.3887	17.062	1	-0.0316122	-0.139639	-0.108027	1	0	0	2	2075
NM_001177833	Smox	chr2_131315597-131319598	TSS11318	6.88547	6.7755	5.9367	9	-0.0232245	-0.213861	-0.190637	1	0	0	1	1725
NM_011170	Prnp	chr2_131733663-131737664	TSS11319	8.89628	8.9592	11.209	1	0.0101666	0.33335	0.323183	1	0	0	1	750
NM_023043	Prnd	chr2_131774596-131778597	TSS11320	0.488364	0.442678	0.617208	2	-0.141396	0.337184	0.47858	1	0	0	1	100
NM_138651	Cds2	chr2_132086992-132090993	TSS11321	18.8376	16.3935	21.6316	1	-0.20048	0.199515	0.399995	1	0	0	1	1950
NM_028637	1110034G24Rik	chr2_132514018-132518019	TSS11324	2.57921	2.62411	2.88171	1	0.0248894	0.159937	0.135048	1	0	0	2	600
NM_007694	Chgb	chr2_132605013-132609014	TSS11325	0.0860851	0.205371	0.0521916	1	1.24474	-0.711227	-1.95597	1	0	0	1	850
NM_025676	Mcm8	chr2_132640070-132644071	TSS11326	11.4648	9.34881	12.9878	1	-0.294328	0.179931	0.474259	1	0	0	2	2050
NM_001024385	Crls1	chr2_132670401-132674402	TSS11327	5.50712	4.19004	7.0919	1	-0.394252	0.364816	0.759067	1	0	0	1	1650
NM_025646	Crls1	chr2_132671469-132675470	TSS11328	10.7608	12.6303	9.61742	1	0.231084	-0.162048	-0.393131	1	0	0	1	1650
NM_007553	Bmp2	chr2_133376934-133380935	TSS11329	0.698792	0.552134	0.592361	1	-0.339297	-0.238016	0.101281	2	3	2550	2	2350
NM_030724	Uck2	chr1_169213258-169217259	TSS1133	71.8606	77.649	85.6505	1	0.111765	0.253257	0.141493	1	0	0	1	2542
NM_001145830	Plcb1	chr2_134609899-134613900	TSS11330	0.355497	0.446972	0.435935	2	0.329519	0.293531	-0.0359887	2	1	425	1	1200
NM_029530	6330527O06Rik	chr2_135881662-135885663	TSS11332	0	0	0	1	0	0	0	2	3	1463	1	1625
NM_175667	Ankrd5	chr2_136356056-136360057	TSS11333	0.0801292	0	0	1	-6.34215	-6.34215	0	1	0	0	1	450
NM_011428	Snap25	chr2_136537185-136541186	TSS11334	0.721236	0.770932	0.28225	1	0.0960034	-1.35039	-1.4464	1	0	0	2	1325
NM_028201	2210009G21Rik	chr2_136714953-136718954	TSS11335	0	0	0.12721	1	0	7.00236	7.00236	1	0	0	2	1200
NM_028834	2210009G21Rik	chr2_136715998-136719999	TSS11336	0.469114	1.16304	1.03387	3	1.30806	1.13837	-0.169696	1	0	0	2	1200
NM_001025431	Btbd3	chr2_138080319-138084320	TSS11338	5.25292	5.33484	6.34181	1	0.0223212	0.271728	0.249407	1	0	0	2	1300
NM_145534	Btbd3	chr2_138102228-138106229	TSS11339	0.625765	0	0	1	-9.29178	-9.29178	0	1	0	0	1	875
NM_025569	Mgst3	chr1_169321928-169325929	TSS1134	5.91908	5.46989	9.80092	1	-0.113841	0.727448	0.841289	1	0	0	1	1825
NM_001126490	Ism1	chr2_139501913-139505914	TSS11342	0.0684216	0.0494076	0.184819	1	-0.461743	1.42044	1.88218	2	1	650	1	2150
NM_027093	2310003L22Rik	chr2_139994381-139998382	TSS11343	4.63203	5.32382	6.67573	1	0.200777	0.527186	0.326409	1	0	0	1	1950
NM_001013802	Macrod2	chr2_140219165-140223166	TSS11344	3.10884	2.79891	3.66765	2	-0.151456	0.23841	0.389866	1	0	0	2	1275
NM_021335	Snrpb2	chr2_142886804-142890805	TSS11345	56.9546	53.7812	54.6402	1	-0.0827089	-0.0598485	0.0228604	1	0	0	1	950
NM_008792	Pcsk2	chr2_143369868-143373869	TSS11347	0.0564781	0.0780515	0.0377242	1	0.45978	-0.569777	-1.02956	2	1	844	1	2944
NM_019771	Dstn	chr2_143739066-143743067	TSS11348	168.836	146.918	165.353	1	-0.20061	-0.0300732	0.170537	1	0	0	3	2867
NM_028984	8430406I07Rik	chr2_144094770-144098771	TSS11350	13.9522	13.9544	13.6865	1	0.000227452	-0.0277371	-0.0279645	1	0	0	3	2550
NM_181417	Csrp2bp	chr2_144192770-144196771	TSS11351	25.6155	26.5879	26.3794	3	0.053751	0.0423975	-0.0113535	1	0	0	1	1550
NR_033459	Zfp133-ps	chr2_144283015-144287016	TSS11352	0.595293	0.0556824	0.267756	1	-3.39505	-1.14972	2.24532	1	0	0	1	925
NM_029763	Polr3f	chr2_144351480-144355481	TSS11353	8.51473	7.76411	8.38714	1	-0.133124	-0.0217793	0.111345	1	0	0	1	1650
NM_019787	Sec23b	chr2_144379964-144383965	TSS11354	32.0342	30.8373	28.7262	1	-0.0549348	-0.157241	-0.102306	1	0	0	1	1075
NM_001033297	Gm561	chr2_144417800-144421801	TSS11355	4.99597	5.59245	6.8421	1	0.162685	0.453596	0.290912	1	0	0	3	1100
NM_025314	Dtd1	chr2_144423688-144427689	TSS11356	13.0533	16.2388	14.5279	1	0.315009	0.1544	-0.160608	1	0	0	1	850
NM_008783	Pbx1	chr1_170360389-170364390	TSS1136	3.6498	3.18587	3.59197	2	-0.196072	-0.0230385	0.173033	1	0	0	2	1700
NM_028724	Rin2	chr2_145609851-145613852	TSS11360	2.23533	2.64545	3.80034	1	0.242925	0.765375	0.52245	1	0	0	1	825
NM_001141965	Naa20	chr2_145726976-145730977	TSS11361	41.7108	42.7416	39.4028	2	0.0352194	-0.0821201	-0.11734	1	0	0	1	1600
NM_175280	4930529M08Rik	chr2_145758519-145762520	TSS11362	0.117755	0.293603	0.322796	1	1.31078	1.4471	0.136313	1	0	0	2	1175
NM_016889	Insm1	chr2_146045732-146049733	TSS11363	3.67431	4.39112	3.26458	1	0.257052	-0.170527	-0.427578	2	4	2251	1	3300
NM_001033298	Plk1s1	chr2_146679624-146683625	TSS11364	3.96242	3.42611	1.92038	1	-0.209753	-1.0446	-0.83485	1	0	0	1	900
NM_011917	Xrn2	chr2_146836795-146840796	TSS11365	49.1595	40.6393	40.236	1	-0.274589	-0.288977	-0.0143883	1	0	0	3	2105
NR_030769	Nkx2-2as	chr2_147007818-147011819	TSS11366	0	0	0	1	0	0	0	2	3	3451	3	1319
NM_008780	Pax1	chr2_147188729-147192730	TSS11367	0.120812	0.080604	0.0841966	1	-0.577944	-0.515789	0.062156	2	2	3751	1	1225
NM_009219	Sstr4	chr2_148219112-148223113	TSS11368	0.0882915	0	0.0511619	1	-6.48045	-0.775526	5.70492	2	2	1625	1	1450
NM_019761	Nxt1	chr2_148496350-148500351	TSS11369	26.8438	29.1551	25.8403	2	0.119159	-0.0549607	-0.174119	1	0	0	1	1775
NM_023284	Nuf2	chr1_171459595-171463596	TSS1137	23.7915	17.8164	21.6439	1	-0.41722	-0.13648	0.28074	1	0	0	2	1150
NM_028986	Gzf1	chr2_148504855-148508856	TSS11370	10.3211	9.61419	12.7826	1	-0.102349	0.308558	0.410907	1	0	0	2	1650
NM_177655	Cstl1	chr2_148574096-148578097	TSS11371	0	0	0	1	0	0	0	1	0	0	1	122
NM_001085521	Tmem90b	chr2_149654518-149658519	TSS11378	0.996104	0.602162	0.421133	1	-0.725198	-1.24005	-0.514848	2	1	900	1	2550
NM_001145863	Gm14139	chr2_150005490-150009491	TSS11379	5.38247	3.92147	3.10772	1	-0.456774	-0.792216	-0.335442	1	0	0	2	950
NM_009062	Rgs4	chr1_171675773-171679774	TSS1138	0.177097	0.114899	0.160156	1	-0.619795	-0.144205	0.47559	1	0	0	1	175
NM_001142411	Zfp937	chr2_150041834-150045835	TSS11380	5.33199	4.44501	4.41374	1	-0.262433	-0.272616	-0.0101827	1	0	0	1	650
NM_001142410	Gm14124	chr2_150081252-150085253	TSS11381	5.26809	4.77736	3.5351	1	-0.141038	-0.575395	-0.434356	1	0	0	2	575
NM_172117	Entpd6	chr2_150572816-150576817	TSS11383	12.1908	15.4515	15.6925	1	0.341929	0.364256	0.0223269	1	0	0	1	825
NM_153781	Pygb	chr2_150610531-150614532	TSS11384	20.1139	17.8002	16.2119	1	-0.17629	-0.311122	-0.134832	1	0	0	1	1550
NM_027014	Gins1	chr2_150733329-150737330	TSS11385	32.1394	30.3078	25.6233	2	-0.0846488	-0.326874	-0.242225	1	0	0	1	925
NM_198326	Nsfl1c	chr2_151318043-151322044	TSS11387	65.3264	76.5212	64.8961	1	0.22819	-0.00953421	-0.237724	1	0	0	1	800
NM_008019	Fkbp1a	chr2_151366234-151370235	TSS11388	118.995	128.369	121.914	1	0.109395	0.0349626	-0.0744324	1	0	0	1	2600
NM_010476	Hsd17b7	chr1_171897336-171901337	TSS1139	8.91617	8.39607	5.44453	1	-0.0866999	-0.711513	-0.624814	1	0	0	2	1125
NM_001160363	5430405G05Rik	chr2_151525743-151529744	TSS11390	0.0299148	0.176191	0.0717154	1	2.51894	1.23396	-1.28497	2	1	1169	1	1600
NM_001040689	Rspo4	chr2_151666662-151670663	TSS11391	0.3916	0.629101	0.379125	1	0.682523	-0.0465863	-0.729109	1	0	0	1	1000
NM_009641	Angpt4	chr2_151735067-151739068	TSS11392	0.0564493	0.0553021	0.0883605	1	-0.0291006	0.637348	0.666449	1	0	0	1	275
NM_027172	Slc52a3	chr2_151820246-151824247	TSS11393	3.10524	2.79117	4.50001	3	-0.153784	0.535078	0.688863	1	0	0	2	354
NM_001164819	Slc52a3	chr2_151823601-151827602	TSS11394	1.42548	0.659262	2.40452	2	-1.11135	0.753891	1.86524	1	0	0	1	650
NM_001160410	Scrt2	chr2_151905264-151909265	TSS11395	0.203837	0.0513891	0.0645993	1	-1.96714	-1.64272	0.324414	2	2	1200	1	1975
NM_029688	Srxn1	chr2_151929465-151933466	TSS11396	16.3925	19.163	16.078	1	0.225275	-0.0279462	-0.253221	1	0	0	1	1900
NM_009328	Tcf15	chr2_151967344-151971345	TSS11397	16.2946	29.5742	16.6873	1	0.859905	0.0343545	-0.825551	1	0	0	1	3670
NM_007788	Csnk2a1	chr2_152050575-152054576	TSS11398	113.569	123.732	118.819	1	0.123649	0.0651959	-0.0584526	1	0	0	2	1700
NM_024196	Tbc1d20	chr2_152117607-152121608	TSS11399	9.95736	10.0046	13.1322	1	0.00682761	0.399238	0.392411	1	0	0	1	1475
NR_033505	Gm14164	chr2_152169404-152173405	TSS11400	0.736052	0.803549	0.503621	1	0.126414	-0.546566	-0.67298	1	0	0	2	1971
NM_177656	6820408C15Rik	chr2_152239322-152243323	TSS11401	0.290634	0.196587	0.187706	1	-0.561671	-0.628019	-0.0663477	1	0	0	1	2178
NM_009047	Rem1	chr2_152450743-152454744	TSS11406	0.0787519	0.07821	0.213074	1	-0.00983631	1.42452	1.43436	2	2	2075	1	1175
NM_001159553	H13	chr2_152493196-152497197	TSS11407	7.2724	7.9527	7.53613	4	0.128996	0.051385	-0.0776109	1	0	0	1	2122
NM_025543	Mcts2	chr2_152510883-152514884	TSS11408	9.7522	11.131	8.08465	1	0.190765	-0.270512	-0.461277	1	0	0	2	2450
NM_010495	Id1	chr2_152560009-152564010	TSS11409	7.42149	10.9558	17.1694	1	0.561851	1.20995	0.648097	1	0	0	2	3085
NM_133806	Uap1	chr1_172103077-172107078	TSS1141	17.0556	18.3517	18.3327	1	0.105662	0.104168	-0.00149435	1	0	0	1	1475
NM_053091	Cox4i2	chr2_152577908-152581909	TSS11410	0.289053	1.03647	0.829492	1	1.83868	1.51765	-0.321031	1	0	0	1	975
NM_001141978	Tpx2	chr2_152671699-152675700	TSS11411	63.3489	60.5388	54.2509	5	-0.0654566	-0.223669	-0.158212	1	0	0	2	1225
NM_001083618	Ttll9	chr2_152786220-152790221	TSS11413	0.200561	0.272041	0.282301	2	0.437898	0.491116	0.0532181	1	0	0	1	700
NM_001011732	Xkr7	chr2_152855587-152859588	TSS11414	0.532679	0.517359	0.503906	1	-0.0420206	-0.0799574	-0.0379368	2	1	50	1	1850
NM_145536	BC020535	chr2_152889737-152893738	TSS11415	0	0.0614791	0.0651156	1	5.9653	6.04692	0.081617	1	0	0	1	350
NM_001172117	Hck	chr2_152932203-152936204	TSS11416	4.67536	4.58951	3.33351	1	-0.0267316	-0.487911	-0.46118	1	0	0	1	2475
NM_133847	Tm9sf4	chr2_152985036-152989037	TSS11417	19.13	18.2839	22.2147	1	-0.0652596	0.215667	0.280927	1	0	0	1	1600
NM_080463	Pofut1	chr2_153065267-153069268	TSS11418	4.45647	4.80195	4.35818	1	0.107696	-0.0321683	-0.139864	1	0	0	1	2650
NM_008444	Kif3b	chr2_153115151-153119152	TSS11419	4.37969	5.41276	4.18293	1	0.305473	-0.0662994	-0.371772	1	0	0	1	1425
NM_010633	Uhmk1	chr1_172143524-172147525	TSS1142	7.06146	5.48003	6.3127	1	-0.365724	-0.161685	0.204039	1	0	0	1	800
NM_001039939	Asxl1	chr2_153169874-153173875	TSS11420	35.6292	32.7845	25.0812	1	-0.120043	-0.506437	-0.386394	1	0	0	1	2500
NM_001122997	Dnmt3b	chr2_153473189-153477190	TSS11421	42.1288	51.0297	41.4797	7	0.276526	-0.0223977	-0.298924	1	0	0	1	2640
NM_007896	Mapre1	chr2_153565022-153569023	TSS11422	33.7415	34.5592	27.5261	1	0.0345447	-0.293714	-0.328259	1	0	0	1	1925
NR_036629	Efcab8	chr2_153604614-153608615	TSS11423	0.138488	0.0330689	0.0895609	1	-2.03361	-0.623181	1.41043	1	0	0	1	650
NM_001109985	Nos1ap	chr1_172517980-172521981	TSS1143	0.768271	1.00157	2.43819	3	0.382138	1.66484	1.2827	2	1	450	1	1350
NM_144890	Bpifb5	chr2_154047477-154051478	TSS11435	0.165568	0	0.020836	1	-7.37997	-2.93133	4.44864	1	0	0	1	750
NM_172860	Cbfa2t2	chr2_154260219-154264220	TSS11438	21.1217	19.4811	24.7403	2	-0.116646	0.228126	0.344773	1	0	0	3	1700
NM_029305	1700003F12Rik	chr2_154372639-154376640	TSS11439	0.969645	1.48499	1.24659	1	0.614409	0.362128	-0.252281	1	0	0	1	875
NM_001171640	1700007I08Rik	chr2_154375511-154379512	TSS11440	0.503717	0.203514	0.194998	1	-1.30328	-1.36464	-0.0613607	1	0	0	2	1764
NM_199304	Zfp341	chr2_154437103-154441104	TSS11441	4.07852	4.05829	4.44406	1	-0.007172	0.123803	0.130975	1	0	0	1	2604
NM_029362	Chmp4b	chr2_154480761-154484762	TSS11442	39.7975	41.6762	38.0327	1	0.0665443	-0.0654358	-0.13198	1	0	0	2	1439
NM_001139511	Raly	chr2_154614845-154618846	TSS11443	155.049	163.131	133.222	4	0.0733045	-0.218895	-0.2922	1	0	0	4	2475
NM_008395	Itch	chr2_154957216-154961217	TSS11445	14.0147	12.9277	14.9827	1	-0.116467	0.0963501	0.212817	1	0	0	1	1150
NM_025947	Dynlrb1	chr2_155060268-155064269	TSS11446	53.0542	50.5295	47.229	1	-0.0703397	-0.167791	-0.0974509	1	0	0	1	1875
NM_025735	Map1lc3a	chr2_155100099-155104100	TSS11447	13.6077	13.5096	16.5378	1	-0.0104375	0.281325	0.291763	1	0	0	1	1625
NR_030475	Mir695	chr2_155180552-155184553	TSS11448	0	0.670209	0	1	9.39062	0	-9.39062	1	0	0	1	1275
NM_178111	Trp53inp2	chr2_155205591-155209592	TSS11449	8.21677	8.51121	7.3774	1	0.0507868	-0.155439	-0.206226	1	0	0	1	1475
NM_001081304	Atf6	chr1_172795902-172799903	TSS1145	8.84073	8.29388	10.4602	1	-0.0921076	0.242648	0.334755	1	0	0	2	1475
NM_019811	Acss2	chr2_155341778-155345779	TSS11450	5.64159	7.39811	5.00496	1	0.390994	-0.172711	-0.563705	1	0	0	1	1325
NM_001085378	Myh7b	chr2_155434947-155438948	TSS11451	1.73508	1.40774	1.32425	1	-0.301428	-0.389569	-0.0881408	1	0	0	1	498
NM_011171	Procr	chr2_155574952-155578953	TSS11453	2.36049	3.31452	4.47182	1	0.489538	0.921487	0.43195	1	0	0	2	903
NM_010808	Mmp24	chr2_155599079-155603080	TSS11454	0.193915	0.248135	0.130505	1	0.354083	-0.567727	-0.92181	2	2	1575	1	1350
NM_001130000	Cep250	chr2_155780293-155784294	TSS11455	10.859	9.00715	8.98429	6	-0.26972	-0.273387	-0.00366664	1	0	0	1	1150
NM_025516	Ergic3	chr2_155831860-155835861	TSS11456	36.4834	42.0869	48.897	1	0.206126	0.422496	0.21637	1	0	0	1	1700
NM_139151	Spag4	chr2_155888948-155892949	TSS11457	0.840948	0.870137	0.988692	1	0.0491685	0.233248	0.18408	1	0	0	1	1400
NM_001164215	Romo1	chr2_155967970-155971971	TSS11458	26.9325	40.1498	29.2054	4	0.576026	0.116882	-0.459144	1	0	0	1	1500
NM_001164215	Romo1	chr2_155967970-155971971	TSS11459	1.73794	0	3.34286	1	-10.764	0.943306	11.7073	1	0	0	1	1500
NM_023173	Dusp12	chr1_172813671-172817672	TSS1146	10.9293	13.9499	13.9458	1	0.352025	0.351601	-0.000424053	1	0	0	1	1150
NM_172674	Phf20	chr2_156020382-156024383	TSS11460	23.1785	22.7806	25.0854	1	-0.0249804	0.114056	0.139036	1	0	0	1	2533
NM_027585	4921517L17Rik	chr2_156136208-156140209	TSS11461	0.889057	0.526624	1.56875	1	-0.754388	0.818565	1.57295	1	0	0	1	1400
NM_013510	Epb4.1l1	chr2_156244787-156248788	TSS11462	4.81196	3.95005	5.03949	2	-0.284686	0.0666411	0.351327	1	0	0	2	2325
NM_001006664	Epb4.1l1	chr2_156299572-156303573	TSS11463	1.16138	1.39857	0.304614	1	0.267902	-1.9273	-2.1952	1	0	0	1	1400
NM_026661	0610011L14Rik	chr2_156371311-156375312	TSS11464	6.16644	6.80711	5.43986	2	0.142583	-0.180837	-0.32342	1	0	0	1	1475
NM_146128	Dlgap4	chr2_156437440-156441441	TSS11465	5.19457	6.56061	4.07533	1	0.336768	-0.350011	-0.686779	2	1	300	1	2550
NM_001042488	Dlgap4	chr2_156544720-156548721	TSS11466	4.96325	2.97194	5.15673	1	-0.739685	0.0551605	0.794846	1	0	0	1	2850
NM_001042487	Dlgap4	chr2_156545014-156549015	TSS11467	1.91706	1.22825	1.45134	1	-0.641869	-0.401269	0.240601	1	0	0	1	2850
NM_172118	Myl9	chr2_156599199-156603200	TSS11468	3.63741	2.90109	2.97951	1	-0.326216	-0.287749	0.038467	1	0	0	1	1350
NM_173396	Tgif2	chr2_156663812-156667813	TSS11469	18.409	16.1285	22.2303	1	-0.190788	0.272103	0.462891	1	0	0	2	3388
NM_026124	1110008F13Rik	chr2_156686857-156690858	TSS11470	54.3881	62.1917	53.9337	1	0.193428	-0.0121038	-0.205531	1	0	0	1	2650
NM_019642	Rpn2	chr2_157102833-157106834	TSS11472	76.3614	77.3972	96.2672	1	0.0194376	0.334197	0.314759	1	0	0	2	2050
NM_026968	Manbal	chr2_157191329-157195330	TSS11473	18.4284	16.8901	18.2347	1	-0.125746	-0.0152435	0.110502	1	0	0	1	1675
NM_001025395	Src	chr2_157248028-157252029	TSS11474	15.5847	17.1328	17.9798	2	0.136622	0.206228	0.0696062	1	0	0	1	2075
NM_180960	Nnat	chr2_157383845-157387846	TSS11475	6.92125	9.53544	5.64905	2	0.46221	-0.292977	-0.755187	1	0	0	4	2171
NM_025680	Ctnnbl1	chr2_157561136-157565137	TSS11476	25.9878	28.6447	28.0734	1	0.140429	0.111365	-0.0290634	1	0	0	1	1250
NM_198627	Vstm2l	chr2_157738388-157742389	TSS11477	0.518068	0.403807	0.600564	1	-0.358689	0.212795	0.571484	2	3	2000	1	1200
NM_027434	Rprd1b	chr2_157852529-157856530	TSS11478	11.4817	11.2008	10.1524	1	-0.0357313	-0.177499	-0.141768	1	0	0	1	2675
NM_177850	Bpi	chr2_158081976-158085977	TSS11480	0.0327135	0	0	1	-5.07525	-5.07525	0	1	0	0	1	900
NM_175692	Snhg11	chr2_158199373-158203374	TSS11482	10.941	9.17137	5.24128	1	-0.25451	-1.06161	-0.8071	1	0	0	1	1625
NM_177658	Ralgapb	chr2_158233588-158237589	TSS11483	10.1305	9.54179	9.49688	1	-0.0863648	-0.0931704	-0.0068056	1	0	0	1	1925
NM_001145015	Arhgap40	chr2_158336531-158340532	TSS11485	0.019732	0	0	1	-4.37379	-4.37379	0	1	0	0	1	369
NM_009508	Slc32a1	chr2_158434493-158438494	TSS11486	0.136159	0.349517	0.190248	1	1.35364	0.479595	-0.87404	2	2	3594	3	1700
NM_175419	Actr5	chr2_158448648-158452649	TSS11487	5.68734	5.75852	6.00313	1	0.0179409	0.0779475	0.0600066	1	0	0	1	1100
NM_153089	Ppp1r16b	chr2_158490468-158494469	TSS11488	1.36802	0.574852	0.49058	1	-1.24937	-1.47765	-0.228272	2	1	1294	1	1769
NM_001159662	Ppp1r16b	chr2_158490870-158494871	TSS11489	4.95691e-05	0.732517	0.316624	1	9.44889	8.24138	-1.20751	2	1	1696	1	2000
NM_010187	Fcgr2b	chr1_172904202-172908203	TSS1149	0.159969	0.0863946	0.325853	2	-0.881167	1.02186	1.90303	1	0	0	1	578
NM_027975	Fam83d	chr2_158591834-158595835	TSS11490	17.4505	13.8603	14.3196	1	-0.332288	-0.285259	0.0470294	1	0	0	2	1875
NM_145742	Dhx35	chr2_158618555-158622556	TSS11491	10.7597	8.88867	11.7118	1	-0.27557	0.122314	0.397884	1	0	0	1	1650
NM_009408	Top1	chr2_160469632-160473633	TSS11492	64.0471	85.9779	62.2343	1	0.424827	-0.0414227	-0.46625	1	0	0	1	1675
NM_021280	Plcg1	chr2_160555045-160559046	TSS11493	24.3219	23.583	22.7447	1	-0.0445068	-0.0967214	-0.0522146	1	0	0	2	2200
NR_033569	9430021M05Rik	chr2_162484898-162488899	TSS11495	0	0	0	1	0	0	0	2	2	2300	2	1600
NM_026499	Srsf6	chr2_162755243-162759244	TSS11496	113.464	137.704	81.3511	1	0.279334	-0.479996	-0.759329	1	0	0	3	2851
NM_001081338	L3mbtl1	chr2_162767200-162771201	TSS11497	0.23872	0.210082	0.0671871	1	-0.183547	-1.81378	-1.63023	1	0	0	1	1300
NM_172150	Ift52	chr2_162841207-162845208	TSS11499	17.4447	14.5876	20.2499	1	-0.25803	0.215115	0.473145	1	0	0	2	1200
NM_145517	Ormdl1	chr1_53351938-53355939	TSS115	11.0019	10.1549	11.587	1	-0.115566	0.0747478	0.190313	1	0	0	1	925
NM_008652	Mybl2	chr2_162878370-162882371	TSS11500	197.459	186.503	207.302	1	-0.0823539	0.0701806	0.152534	1	0	0	2	3176
NM_144891	Gdap1l1	chr2_163262202-163266203	TSS11502	0.659375	1.02978	0.826997	1	0.642379	0.32634	-0.316039	1	0	0	1	1025
NR_028122	2310001K24Rik	chr2_163296280-163300281	TSS11503	0.199569	0.735232	0.330264	1	1.87606	0.723883	-1.15218	1	0	0	1	1425
NM_001099331	R3hdml	chr2_163316053-163320054	TSS11504	0.0494067	0.0977703	0	1	0.970462	-5.65554	-6.62601	1	0	0	3	1950
NM_181734	Ttpal	chr2_163426049-163430050	TSS11506	1.94391	1.89631	1.32985	2	-0.0357481	-0.547357	-0.511609	1	0	0	1	850
NR_028113	0610039K10Rik	chr2_163468585-163472586	TSS11507	0.162373	0.261037	0.0332178	1	0.681601	-2.25535	-2.93695	1	0	0	1	1175
NM_001039390	Pkig	chr2_163482121-163486122	TSS11508	7.1992	9.40073	6.63451	4	0.38489	-0.117829	-0.502718	1	0	0	1	1000
NM_025321	Sdhc	chr1_173078734-173082735	TSS1151	58.0794	58.4451	63.6449	1	0.00905537	0.132016	0.122961	1	0	0	1	1425
NM_001030292	Kcnk15	chr2_163677485-163681486	TSS11511	0.044373	0	0	1	-5.50376	-5.50376	0	2	2	2175	1	850
NM_018753	Ywhab	chr2_163818932-163822933	TSS11512	59.6267	66.4262	43.4298	1	0.155791	-0.457264	-0.613056	1	0	0	1	1725
NM_001114079	Pabpc1l	chr2_163849185-163853186	TSS11513	0.18385	0.195201	0.127153	1	0.0859774	-0.528488	-0.614465	1	0	0	1	275
NM_021420	Stk4	chr2_163897913-163901914	TSS11514	17.9992	19.1121	17.0653	1	0.0865489	-0.0768626	-0.163411	1	0	0	1	1425
NM_009036	Rbpjl	chr2_164226693-164230694	TSS11518	0.241891	0.160058	0.287766	1	-0.592729	0.249592	0.842321	2	4	2201	1	800
NM_025575	Sys1	chr2_164284470-164288471	TSS11519	9.41577	10.2594	10.5643	1	0.123783	0.16603	0.0422468	1	0	0	1	1175
NM_025557	Pcp4l1	chr1_173124399-173128400	TSS1152	0.415094	0.905142	0.261314	1	1.12283	-0.665615	-1.78844	1	0	0	1	850
NM_001048227	Dbndd2	chr2_164309639-164313640	TSS11520	0.326455	0	0	1	-8.35515	-8.35515	0	2	1	575	1	1550
NM_026797	Dbndd2	chr2_164309954-164313955	TSS11521	0.317181	0.189948	0.237486	1	-0.736668	-0.415943	0.320725	2	1	575	1	1550
NM_001048228	Dbndd2	chr2_164310376-164314377	TSS11522	0	0.152137	1.8733e-05	1	7.25868	0.026776	-7.2319	2	1	575	1	1550
NM_001048229	Dbndd2	chr2_164311610-164315611	TSS11523	0	0.142632	0.334509	1	7.16623	8.39021	1.22397	2	1	215	1	1265
NM_133779	Pigt	chr2_164321024-164325025	TSS11524	22.1787	18.2133	25.6872	1	-0.284168	0.211866	0.496034	1	0	0	1	1300
NM_026323	Wfdc2	chr2_164386215-164390216	TSS11525	25.9154	38.155	30.4662	1	0.558045	0.233392	-0.324653	1	0	0	1	1825
NM_001039501	Wfdc10	chr2_164479545-164483546	TSS11527	0.201844	0.295269	0.451361	1	0.546537	1.1571	0.610567	1	0	0	2	500
NM_001037170	Tomm40l	chr1_173150645-173154646	TSS1153	6.80852	8.29138	10.0381	1	0.284233	0.560005	0.275772	1	0	0	1	1950
NM_001040055	Gm14316	chr2_164538804-164542805	TSS11530	0	0	0	1	0	0	0	0	0	0	0	0
NM_133763	Dnttip1	chr2_164569514-164573515	TSS11531	13.7484	14.7652	13.9891	1	0.10293	0.0250376	-0.0778923	1	0	0	1	1600
NM_026785	Ube2c	chr2_164593428-164597429	TSS11532	138.351	124.173	124.456	1	-0.15598	-0.152696	0.00328425	1	0	0	2	3451
NM_133924	Snx21	chr2_164609520-164613521	TSS11533	1.74274	1.23127	1.93061	1	-0.500867	0.147619	0.648485	1	0	0	1	1475
NM_178375	Zswim3	chr2_164628613-164632614	TSS11534	3.9015	4.45602	5.29038	1	0.191681	0.439245	0.247565	1	0	0	1	3000
NM_028028	Zswim1	chr2_164646185-164650186	TSS11535	15.3092	14.6931	14.4979	1	-0.0592561	-0.0785497	-0.0192935	1	0	0	3	2936
NM_001038492	Ctsa	chr2_164656372-164660373	TSS11536	18.6823	16.7697	29.3635	2	-0.155802	0.652326	0.808128	1	0	0	1	2448
NM_146129	Pcif1	chr2_164702867-164706868	TSS11537	13.1514	12.7761	14.6891	1	-0.0417657	0.159518	0.201284	1	0	0	1	2825
NM_013599	Mmp9	chr2_164771750-164775751	TSS11538	1.28797	0.824811	1.06876	1	-0.642335	-0.268932	0.373404	2	1	1676	1	1051
NM_020333	Slc12a5	chr2_164791487-164795488	TSS11539	0.549682	0.545559	0.37612	1	-0.0108422	-0.546196	-0.535354	2	2	2838	1	1200
NM_010185	Fcer1g	chr1_173162480-173166481	TSS1154	0.287669	0.273156	0.0564077	1	-0.0744191	-2.3301	-2.25568	1	0	0	1	175
NM_170704	Cd40	chr2_164879135-164883136	TSS11540	0.707519	0.847802	0.777883	5	0.260621	0.1366	-0.124021	1	0	0	1	850
NM_130451	Slc2a10	chr2_165327477-165331478	TSS11541	0.246641	0.232697	0.368615	1	-0.083611	0.577773	0.661384	1	0	0	1	750
NM_010165	Eya2	chr2_165478797-165482798	TSS11542	0.294783	0.202559	0.17957	1	-0.539092	-0.711981	-0.172889	1	0	0	1	300
NM_008679	Ncoa3	chr2_165816136-165820137	TSS11543	38.8793	34.0788	43.9167	1	-0.190122	0.175763	0.365886	1	0	0	2	2275
NM_023815	Trp53rk	chr2_166617266-166621267	TSS11546	1.54163	1.77418	1.37941	1	0.202573	-0.160295	-0.362868	1	0	0	1	1600
NM_001085495	Arfgef2	chr2_166629080-166633081	TSS11547	10.9624	9.52343	12.8805	1	-0.202991	0.232605	0.435596	1	0	0	1	1225
NM_023565	Cse1l	chr2_166729595-166733596	TSS11548	94.2095	84.2679	79.1684	1	-0.160888	-0.250945	-0.0900574	1	0	0	2	2075
NM_153065	Ddx27	chr2_166838812-166842813	TSS11549	46.6791	52.0243	46.418	1	0.156406	-0.00809221	-0.164498	1	0	0	1	2125
NM_153064	Ndufs2	chr1_173175243-173179244	TSS1155	88.6847	90.1818	113.299	1	0.0241508	0.353374	0.329224	1	0	0	1	2225
NM_001081005	1500012F01Rik	chr2_166886433-166890434	TSS11550	70.7158	63.9368	81.722	1	-0.145384	0.208689	0.354073	1	0	0	1	3484
NR_028540	Snord12	chr2_166888792-166892793	TSS11551	12.632	33.6182	18.9488	1	1.41209	0.584985	-0.827103	1	0	0	2	3058
NM_178371	Slc9a8	chr2_167245220-167249221	TSS11552	9.01615	6.69928	7.53976	2	-0.42845	-0.257961	0.170489	1	0	0	1	3096
NM_030743	Rnf114	chr2_167316144-167320145	TSS11553	16.247	17.4305	18.6672	1	0.101435	0.200321	0.0988861	1	0	0	1	2000
NM_011427	Snai1	chr2_167361726-167365727	TSS11554	1.89082	2.73987	4.11244	1	0.534859	1.12057	0.585711	2	2	900	2	1927
NM_009883	Cebpb	chr2_167512414-167516415	TSS11555	15.366	15.1335	19.8366	1	-0.0219945	0.368402	0.390396	1	0	0	1	3215
NR_015500	A530013C23Rik	chr2_167514707-167518708	TSS11556	0.0273031	0.0262267	0.111181	1	-0.0559379	1.9868	2.04273	1	0	0	1	2143
NM_011201	Ptpn1	chr2_167755826-167759827	TSS11557	8.97822	9.85404	8.47514	1	0.134272	-0.0831827	-0.217454	1	0	0	1	1875
NM_021409	Pard6b	chr2_167904503-167908504	TSS11558	12.2844	12.1883	11.3251	1	-0.0113296	-0.117294	-0.105964	1	0	0	1	2875
NM_001160330	Mocs3	chr2_168054121-168058122	TSS11559	2.30346	2.03504	1.66729	1	-0.178663	-0.466059	-0.287396	1	0	0	2	2950
NM_008911	Ppox	chr1_173209317-173213318	TSS1156	4.49751	4.37502	6.1324	1	-0.0398279	0.44724	0.487068	1	0	0	1	1950
NM_080455	Tshz2	chr2_169457145-169461146	TSS11560	0.0352915	0.0261322	0	1	-0.419626	-5.18156	-4.76193	2	4	475	1	1050
NM_001013369	Pfdn4	chr2_170319927-170323928	TSS11561	14.7427	17.2519	18.0846	1	0.22674	0.294743	0.0680026	2	1	3400	2	1825
NM_001110152	Pfdn4	chr2_170334729-170338730	TSS11562	8.00635	3.75523	4.59917	1	-1.09204	-0.799638	0.292402	1	0	0	2	1575
NM_029761	Dok5	chr2_170555306-170559307	TSS11563	0.392025	0.582747	0.148787	2	0.57072	-1.39171	-1.96243	2	1	175	1	1725
NM_025912	2010011I20Rik	chr2_172169076-172173077	TSS11565	2.528	2.62943	2.48043	1	0.0567316	-0.0273953	-0.0841269	1	0	0	2	1275
NM_024199	Cstf1	chr2_172194502-172198503	TSS11566	25.8105	25.4861	26.9205	1	-0.0182468	0.0607448	0.0789916	1	0	0	2	3128
NM_001080820	Cass4	chr2_172217402-172221403	TSS11567	0.718926	0.346452	0.29371	3	-1.05103	-1.28855	-0.237516	1	0	0	2	1600
NM_001080820	Cass4	chr2_172217402-172221403	TSS11568	0.0583923	0.420209	0.155932	1	2.82619	1.40179	-1.4244	1	0	0	2	1600
NM_025542	2410001C21Rik	chr2_172264077-172268078	TSS11569	24.5493	25.8846	23.1988	1	0.0764091	-0.0816283	-0.158037	1	0	0	1	1800
NM_013919	Usp21	chr1_173216092-173220093	TSS1157	16.3629	12.8818	15.9066	1	-0.34507	-0.0408004	0.30427	1	0	0	1	1950
NM_009335	Tfap2c	chr2_172373092-172377093	TSS11571	17.4157	21.8468	8.38404	1	0.327017	-1.05458	-1.3816	2	2	2183	2	3751
NM_001159696	Tfap2c	chr2_172374490-172378491	TSS11572	4.60352	2.88733	5.11581	1	-0.672815	0.152194	0.825009	2	2	785	2	3285
NM_012046	Spo11	chr2_172803342-172807343	TSS11573	0	0	0	3	0	0	0	1	0	0	1	275
NM_175112	Rae1	chr2_172823617-172827618	TSS11574	53.6964	52.0835	59.8074	1	-0.0439981	0.155496	0.199494	1	0	0	1	2050
NM_019547	Rbm38	chr2_172845402-172849403	TSS11575	28.18	27.8922	23.0938	1	-0.0148094	-0.287155	-0.272345	1	0	0	2	2473
NM_028158	1700021F07Rik	chr2_173346092-173350093	TSS11577	0	0	0	1	0	0	0	0	0	0	0	0
NM_024436	Rab22a	chr2_173483345-173487346	TSS11578	12.9996	14.3556	11.3491	1	0.143136	-0.195873	-0.339009	1	0	0	1	2175
NM_019806	Vapb	chr2_173561071-173565072	TSS11579	10.5684	11.0248	9.9351	1	0.0609899	-0.0891419	-0.150132	1	0	0	1	1300
NM_025388	Ufc1	chr1_173223113-173227114	TSS1158	37.0664	29.5823	46.9379	1	-0.325368	0.340633	0.666001	1	0	0	1	1225
NM_001102425	Stx16	chr2_173900551-173904552	TSS11580	15.9769	15.0526	15.7912	4	-0.0859627	-0.0168638	0.0690989	1	0	0	2	2874
NM_213733	Npepl1	chr2_173933851-173937852	TSS11581	8.49916	8.15386	10.7784	1	-0.0598299	0.342715	0.402545	1	0	0	1	1525
NM_022000	Gnas	chr2_174107820-174111821	TSS11582	2.75446	3.20164	3.33712	3	0.216967	0.276742	0.0597742	1	0	0	2	2746
NM_201618	Gnas	chr2_174121359-174125360	TSS11583	0.0878134	0.0592287	0.0313934	3	-0.560327	-1.45508	-0.894751	2	3	1700	3	3376
NR_003258	Gnas	chr2_174151414-174155415	TSS11584	64.516	61.0991	81.6213	2	-0.0785056	0.339284	0.41779	2	2	2275	1	3115
NM_001077510	Gnas	chr2_174153589-174157590	TSS11585	54.2233	50.304	55.1314	2	-0.108238	0.0239603	0.132198	2	1	761	1	3311
NM_020580	Th1l	chr2_174239304-174243305	TSS11586	34.0267	34.9471	31.8274	1	0.0385044	-0.096395	-0.134899	1	0	0	1	1125
NM_001099328	Zfp831	chr2_174467034-174471035	TSS11588	0.0155543	0	0.00343817	1	-4.04913	-1.89917	2.14996	2	1	150	1	1175
NM_007903	Edn3	chr2_174584273-174588274	TSS11589	0.0175809	0.0825031	0.111565	1	2.16801	2.59887	0.430857	2	2	200	1	750
NM_012049	Nit1	chr1_173273776-173277777	TSS1159	13.9481	8.76446	7.85195	1	-0.67027	-0.828865	-0.158595	1	0	0	2	1975
NM_001177568	Gm14420	chr2_177247446-177251447	TSS11598	13.2647	10.3765	9.05153	1	-0.354242	-0.551308	-0.197066	1	0	0	1	525
NR_036450	Gm14403	chr2_177280930-177284931	TSS11599	6.4111	5.40271	3.80193	1	-0.246847	-0.753686	-0.506839	1	0	0	1	500
NM_028091	Osgepl1	chr1_53368506-53372507	TSS116	4.82575	3.63747	4.63724	1	-0.40772	-0.0574746	0.350246	1	0	0	1	650
NM_001033039	Klhdc9	chr1_173288929-173292930	TSS1160	1.03188	0.742964	1.50314	1	-0.473368	0.542266	1.01563	1	0	0	2	1575
NM_001177399	Etohi1	chr2_177755988-177759989	TSS11600	9.56821	6.85186	8.63807	2	-0.481694	-0.147524	0.33417	1	0	0	1	650
NM_001177790	Phactr3	chr2_177851679-177855680	TSS11601	0.152515	0.253248	0.155693	2	0.727857	0.0295644	-0.698292	1	0	0	1	1050
NM_028806	Phactr3	chr2_177874637-177878638	TSS11602	0	0	0	2	0	0	0	1	0	0	2	975
NM_001177791	Phactr3	chr2_177908053-177912054	TSS11603	0	0	0	2	0	0	0	1	0	0	1	325
NM_001081289	9030418K01Rik	chr2_178147238-178151239	TSS11605	0.847347	0.620282	0.737569	1	-0.449406	-0.199922	0.249484	2	1	300	1	1575
NM_009867	Cdh4	chr2_179175182-179179183	TSS11607	0.614776	0.538004	0.777693	1	-0.19211	0.338649	0.530759	2	3	1158	1	1875
NR_033782	4921531C22Rik	chr2_179709557-179713558	TSS11608	0.157056	0.436522	0.237534	1	1.46892	0.593759	-0.875161	1	0	0	2	2618
NM_177727	Lsm14b	chr2_179757691-179761692	TSS11609	29.8286	26.0743	25.1579	1	-0.194061	-0.245676	-0.051615	1	0	0	1	2225
NM_178750	Ss18l1	chr2_179775187-179779188	TSS11610	2.13791	1.6093	1.90969	1	-0.409546	-0.162782	0.246764	1	0	0	1	3125
NM_181424	Gtpbp5	chr2_179803297-179807298	TSS11611	4.72	5.60622	5.35169	4	0.248194	0.181172	-0.0670216	1	0	0	1	1700
NM_144500	Osbpl2	chr2_179852070-179856071	TSS11612	7.37051	6.71451	6.8934	1	-0.134463	-0.0965352	0.037928	1	0	0	2	2000
NM_019822	Adrm1	chr2_179904292-179908293	TSS11613	62.3814	73.4928	55.7887	1	0.236483	-0.16114	-0.397624	1	0	0	1	2768
NM_025587	Rps21	chr2_179990083-179994084	TSS11614	546.014	540.101	811.699	1	-0.0157087	0.572006	0.587715	1	0	0	1	4001
NR_029528	Mir1a-1	chr2_180121752-180125753	TSS11615	0	0	0	1	0	0	0	0	0	0	0	0
NM_018766	Ntsr1	chr2_180232680-180236681	TSS11618	0	0.0133022	0	1	3.83817	0	-3.83817	2	1	2500	1	1000
NM_028479	1600027N09Rik	chr2_180314008-180318009	TSS11619	7.78507	7.64081	6.6151	1	-0.0269809	-0.234914	-0.207933	1	0	0	1	659
NM_031373	Ogfr	chr2_180322111-180326112	TSS11620	7.82547	10.5049	9.85719	1	0.424766	0.332961	-0.0918051	1	0	0	1	1500
NM_009936	Col9a3	chr2_180330926-180334927	TSS11621	1.08957	1.41851	1.47104	1	0.380311	0.432734	0.0524239	2	1	25	1	875
NM_029607	2310003C23Rik	chr2_180445250-180449251	TSS11622	20.8086	17.6828	18.253	1	-0.234821	-0.189037	0.0457843	1	0	0	2	1400
NM_183161	Slc17a9	chr2_180458043-180462044	TSS11623	4.25685	3.04547	3.23725	1	-0.482987	-0.394911	0.0880758	1	0	0	1	2719
NR_029538	Mir124a-3	chr2_180626744-180630745	TSS11624	0	0	0	1	0	0	0	2	1	2806	2	2381
NM_145760	Arfgap1	chr2_180699929-180703930	TSS11626	13.2191	13.6554	15.5405	11	0.0468423	0.233391	0.186548	1	0	0	1	1350
NM_025598	Ppdpf	chr2_180920047-180924048	TSS11628	45.3095	31.1212	30.1459	1	-0.541901	-0.587836	-0.0459344	1	0	0	1	2673
NM_199312	BC051628	chr2_180952720-180956721	TSS11629	0.0871459	0.0297639	0.0930505	1	-1.51866	0.0935421	1.6122	1	0	0	1	875
NM_001166668	Rtel1	chr2_181052428-181056429	TSS11630	8.13075	8.08452	5.93201	11	-0.00822428	-0.4548	-0.446576	1	0	0	1	1675
NR_030710	Rtel1	chr2_181053510-181057511	TSS11631	1.8523	1.21671	2.36645	1	-0.605926	0.353238	0.959163	1	0	0	2	2000
NM_144894	Zgpat	chr2_181097635-181101636	TSS11632	0.958951	2.02263	1.88987	1	1.07591	0.978018	-0.0978954	1	0	0	1	2700
NM_001048148	Zgpat	chr2_181098127-181102128	TSS11633	4.56783	4.32848	3.85477	1	-0.077631	-0.244806	-0.167175	1	0	0	1	2700
NM_183181	Abhd16b	chr2_181225910-181229911	TSS11635	0.0694323	0.0332054	0.245611	1	-1.04201	1.80793	2.84994	1	0	0	2	1300
NM_025482	Tpd52l2	chr2_181229957-181233958	TSS11636	34.9379	35.1998	37.4714	1	0.010774	0.100994	0.0902202	1	0	0	1	2000
NM_016775	Dnajc5	chr2_181253209-181257210	TSS11637	21.1735	22.5853	20.4504	1	0.0931201	-0.0501283	-0.143248	1	0	0	4	1950
NR_027289	Gm16119	chr2_181311184-181315185	TSS11638	0.905469	0.356728	0.26298	3	-1.34139	-1.77983	-0.438434	1	0	0	1	10
NR_027290	Gm16119	chr2_181312236-181316237	TSS11639	0.298257	0.288611	0.380745	2	-0.0472685	0.351223	0.398492	1	0	0	1	1062
NM_033509	Vangl2	chr1_173955399-173959400	TSS1164	8.00185	7.79578	7.64276	1	-0.0376354	-0.0662314	-0.0285959	1	0	0	1	1775
NM_133701	Prpf6	chr2_181334023-181338024	TSS11640	42.2104	44.258	40.028	1	0.0683382	-0.0765871	-0.144925	1	0	0	2	1602
NM_009326	Tcea2	chr2_181413014-181417015	TSS11641	3.43554	2.50272	3.13448	1	-0.456884	-0.13227	0.324613	1	0	0	1	1675
NM_011012	Oprl1	chr2_181447720-181451721	TSS11642	0.103095	0.1705	0.0472557	1	0.720308	-1.10913	-1.82944	1	0	0	1	425
NM_153594	Pcmtd2	chr2_181570607-181574608	TSS11646	9.23995	9.73653	11.5694	1	0.0755147	0.324326	0.248811	1	0	0	1	1150
NM_025901	Polr3k	chr2_181597064-181601065	TSS11647	10.597	9.70467	9.26764	1	-0.126892	-0.193362	-0.0664701	1	0	0	1	1500
NM_001013376	Rpp38	chr2_3247900-3251901	TSS11648	7.55623	5.73858	7.1967	1	-0.396912	-0.0703216	0.326591	1	0	0	2	1725
NM_010916	Nhlh1	chr1_173985727-173989728	TSS1165	0.0726041	0.133267	0.0243046	1	0.867247	-1.54039	-2.40763	1	0	0	1	50
NM_008579	Meig1	chr2_3337920-3341921	TSS11650	0	0.066851	0.142873	1	6.0843	7.16865	1.08435	1	0	0	1	821
NR_027509	Suv39h2	chr2_3390258-3394259	TSS11651	11.1873	11.6666	12.0045	2	0.0605158	0.101704	0.0411877	1	0	0	2	1450
NM_015765	Hspa14	chr2_3428086-3432087	TSS11652	67.5442	74.0483	76.6917	1	0.132633	0.183236	0.0506032	1	0	0	1	1450
NM_026045	Prpf18	chr2_4571132-4575133	TSS11653	12.4271	13.6557	13.3566	1	0.136003	0.104055	-0.0319481	1	0	0	2	825
NM_027290	Mcm10	chr2_4931837-4935838	TSS11654	32.532	30.7313	33.7101	1	-0.0821481	0.0513198	0.133468	1	0	0	2	1650
NM_181848	Optn	chr2_4982984-4986985	TSS11655	7.2542	5.62504	12.2627	1	-0.366896	0.757307	1.1242	1	0	0	1	1075
NM_177343	Camk1d	chr2_5633710-5637711	TSS11656	2.92321	2.75865	2.75121	1	-0.0835616	-0.0874564	-0.00389475	1	0	0	1	2900
NM_133837	Cdc123	chr2_5764006-5768007	TSS11657	43.1577	43.8473	40.3268	1	0.0228695	-0.0978767	-0.120746	1	0	0	1	2025
NM_021305	Sec61a2	chr2_5814399-5818400	TSS11658	26.0972	26.7807	30.2007	1	0.0372972	0.210679	0.173382	1	0	0	1	1150
NM_001081131	Dhtkd1	chr2_5861838-5865839	TSS11659	6.3788	6.7685	8.51154	1	0.0855381	0.416078	0.33054	1	0	0	1	1150
NM_021607	Ncstn	chr1_174010880-174014881	TSS1166	14.4924	12.9582	14.6948	1	-0.161419	0.0200078	0.181427	1	0	0	1	1325
NM_001159657	5430407P10Rik	chr2_6049231-6053232	TSS11660	1.94175	2.56803	2.71224	2	0.403125	0.481919	0.0787945	2	3	819	1	950
NM_024208	Echdc3	chr2_6132040-6136041	TSS11661	0.497472	0.417734	0.432257	1	-0.251478	-0.202289	0.049189	1	0	0	1	975
NM_008091	Gata3	chr2_9798227-9802228	TSS11667	0.963652	0.871971	0.802565	1	-0.144075	-0.263594	-0.119519	2	3	2526	1	2800
NM_027748	Taf3	chr2_9968236-9972237	TSS11668	8.43374	9.07015	6.95558	1	0.104942	-0.277965	-0.382907	1	0	0	2	2150
NM_001112738	Atp5c1	chr2_10000137-10004138	TSS11669	122.277	134.996	152.22	2	0.14276	0.316006	0.173246	1	0	0	3	2138
NM_011063	Pea15a	chr1_174134912-174138913	TSS1167	5.94971	5.18602	7.11911	1	-0.198156	0.258838	0.456994	1	0	0	1	1625
NM_001177756	Pfkfb3	chr2_11421717-11425718	TSS11671	3.24457	3.2701	3.04366	8	0.0113064	-0.0921867	-0.103493	1	0	0	1	3568
NM_001177758	Pfkfb3	chr2_11473556-11477557	TSS11672	1.95286	0.928784	2.11518	5	-1.07136	0.115131	1.18649	1	0	0	1	1875
NM_152824	Rbm17	chr2_11522826-11526827	TSS11673	99.276	103.151	87.1357	1	0.0552404	-0.188179	-0.243419	1	0	0	1	1375
NM_015792	Fbxo18	chr2_11697154-11701155	TSS11674	19.4464	16.6697	20.8058	1	-0.222263	0.0974778	0.31974	1	0	0	1	2650
NM_001001309	Itga8	chr2_12221547-12225548	TSS11675	0.322684	0.365484	0.637297	1	0.179164	0.979642	0.800478	2	1	50	1	1025
NM_024185	Fam188a	chr2_12339087-12343088	TSS11676	13.4558	13.4524	11.9392	1	-0.000364558	-0.172508	-0.172144	1	0	0	1	1450
NM_153155	C1ql3	chr2_12930491-12934492	TSS11677	0.0731059	0.0481344	0.0512085	1	-0.592855	-0.505304	0.0875513	2	3	3042	1	2275
NM_009105	Rsu1	chr2_13190905-13194906	TSS11678	11.6145	10.1539	13.4247	1	-0.193875	0.208946	0.402821	1	0	0	1	1275
NM_009813	Casq1	chr1_174148026-174152027	TSS1168	0.746287	0.548584	0.604509	1	-0.443322	-0.303514	0.139808	1	0	0	1	775
NM_010067	Trdmt1	chr2_13464291-13468292	TSS11680	2.58626	3.05882	2.27314	1	0.242022	-0.186104	-0.428126	1	0	0	1	850
NM_145838	St8sia6	chr2_13713147-13717148	TSS11681	0.242797	0.579747	0.128114	1	1.25223	-0.917035	-2.16926	2	2	2025	1	1225
NM_013935	Ptpla	chr2_13975662-13979663	TSS11682	2.59317	3.08734	4.0991	2	0.251559	0.660386	0.408828	1	0	0	1	1700
NM_001165942	Nsun6	chr2_14968939-14972940	TSS11683	4.78422	3.77035	3.93712	4	-0.343503	-0.281077	0.0624263	1	0	0	1	475
NM_001165943	Nsun6	chr2_14974499-14978500	TSS11684	0.114597	0.647639	0.485241	5	2.48831	2.07257	-0.415744	1	0	0	1	1600
NM_028757	Nebl	chr2_17650695-17654696	TSS11685	0.28956	0.0877486	0	1	-1.71104	-8.18269	-6.47165	2	1	850	1	1775
NR_028376	A930004D18Rik	chr2_17957368-17961369	TSS11687	0.584547	0.957136	0.317553	2	0.710446	-0.878252	-1.5887	2	2	3007	1	569
NM_028317	2810030E01Rik	chr2_17968076-17972077	TSS11688	0.332705	0.428412	0.279113	1	0.363789	-0.252564	-0.616354	2	3	2474	2	2075
NM_007869	Dnajc1	chr2_18312457-18316458	TSS11689	3.85759	4.05824	4.12284	2	0.0731359	0.0959146	0.0227787	1	0	0	1	1100
NM_008845	Pip4k2a	chr2_18917748-18921749	TSS11690	5.29328	4.64281	4.35855	1	-0.189126	-0.280255	-0.0911297	2	1	27	1	2275
NM_027600	4921504E06Rik	chr2_19473537-19477538	TSS11691	0	0	0	1	0	0	0	1	0	0	1	725
NR_033642	Gm3230	chr2_19577524-19581525	TSS11692	0.0662241	0.0617929	0.216784	1	-0.0983771	1.69585	1.79422	1	0	0	1	2475
NM_001081364	Arhgap21	chr2_20887348-20891349	TSS11693	12.5713	11.7898	11.1723	2	-0.0925814	-0.170191	-0.0776098	1	0	0	1	3374
NM_027728	Enkur	chr2_21124992-21128993	TSS11694	0.355166	0.144772	0.187206	1	-1.28884	-0.920237	0.368599	1	0	0	1	1425
NM_007380	Abi1	chr2_22893760-22897761	TSS11695	20.8348	19.331	22.0998	5	-0.108074	0.0850351	0.193109	1	0	0	1	1150
NM_025979	Mastl	chr2_23009544-23013545	TSS11696	9.62143	9.16558	12.2512	1	-0.0700177	0.348568	0.418585	1	0	0	2	2325
NM_029773	Spopl	chr2_23425624-23429625	TSS11697	3.61164	3.87816	4.91756	5	0.10269	0.445181	0.34249	1	0	0	1	825
NM_030025	Ccdc150	chr1_54305526-54309527	TSS117	0.338502	0.342783	0.14814	1	0.0180781	-1.18675	-1.20483	1	0	0	1	775
NM_011040	Pax8	chr2_24329086-24333087	TSS11700	0.24232	0.329025	0.274975	1	0.43972	0.181683	-0.258038	2	2	1889	1	1764
NM_007579	Cacna1b	chr2_24616672-24620673	TSS11701	0.400291	0.329996	0.50469	1	-0.277835	0.333604	0.611439	1	0	0	1	1850
NM_001042528	Cacna1b	chr2_24616567-24620568	TSS11702	0.418158	0.485028	0.176228	1	0.213545	-1.24189	-1.45543	1	0	0	1	1850
NM_001012518	Ehmt1	chr2_24773110-24777111	TSS11703	20.2637	20.1061	18.8514	4	-0.0112618	-0.104221	-0.092959	1	0	0	2	1825
NM_178408	Arrdc1	chr2_24788801-24792802	TSS11704	7.70003	4.41075	5.58758	5	-0.8037	-0.462569	0.341132	1	0	0	1	1875
NM_001031808	Mrpl41	chr2_24828618-24832619	TSS11705	11.0117	10.5366	11.3045	1	-0.0636219	0.0378566	0.101478	1	0	0	1	2150
NM_001163626	Noxa1	chr2_24948725-24952726	TSS11706	0	0.0582199	0	2	5.88801	0	-5.88801	1	0	0	2	550
NM_146115	A830007P12Rik	chr2_25050333-25054334	TSS11707	4.11067	4.46644	4.71737	1	0.119724	0.198564	0.0788402	1	0	0	1	2667
NM_021393	Cobra1	chr2_25065009-25069010	TSS11708	26.603	25.0679	24.9152	1	-0.0857445	-0.0945591	-0.00881464	1	0	0	2	2035
NM_028961	4933433C11Rik	chr2_25068150-25072151	TSS11709	0.148523	0.187399	0.233554	1	0.333424	0.649553	0.316129	1	0	0	1	1050
NM_146116	Tubb4b	chr2_25078222-25082223	TSS11710	224.925	247.829	147.366	1	0.1399	-0.610037	-0.749937	1	0	0	1	2425
NM_026415	2310002J15Rik	chr2_25093417-25097418	TSS11713	0.0822222	0	0	1	-6.3789	-6.3789	0	1	0	0	1	1493
NM_001082476	Ndor1	chr2_25108934-25112935	TSS11714	6.73592	7.4187	6.96244	1	0.139272	0.047711	-0.0915607	1	0	0	1	2050
NM_023464	Ssna1	chr2_25125938-25129939	TSS11715	18.3178	17.7291	25.7932	1	-0.0471243	0.493722	0.540846	1	0	0	1	2750
NM_008169	Grin1	chr2_25172683-25176684	TSS11716	2.29466	1.67089	0.320423	5	-0.457424	-2.83636	-2.37894	2	1	75	1	950
NR_027448	AA543186	chr2_25186091-25190092	TSS11717	0.88629	1.06425	0.598015	1	0.263714	-0.566814	-0.830528	1	0	0	1	2300
NM_031843	Dpp7	chr2_25209852-25213853	TSS11718	7.86856	9.8427	13.0067	1	0.322918	0.725011	0.402093	1	0	0	1	2225
NM_001033293	Uap1l1	chr2_25219146-25223147	TSS11719	23.2497	25.8255	30.6969	1	0.151578	0.400866	0.249288	1	0	0	1	1200
NM_153557	BC029214	chr2_25314614-25318615	TSS11720	1.02843	0.443449	1.52383	1	-1.21176	0.566803	1.77856	1	0	0	1	1075
NM_008963	Ptgds	chr2_25323269-25327270	TSS11721	0.314481	0.556358	0.316668	1	0.821051	0.00996665	-0.811085	1	0	0	1	75
NM_027062	C8g	chr2_25354026-25358027	TSS11723	1.96467	1.38822	2.29573	1	-0.500746	0.22456	0.725306	1	0	0	1	2225
NM_009422	Traf2	chr2_25400414-25404415	TSS11724	7.4923	7.25569	8.11553	1	-0.0462896	0.115262	0.161551	1	0	0	1	1400
NM_029293	Phpt1	chr2_25428391-25432392	TSS11726	43.8862	52.3556	52.1724	1	0.254571	0.249514	-0.00505696	2	1	592	1	1725
NM_001005424	Gm996	chr2_25433619-25437620	TSS11727	0.326227	0.394189	0.377911	1	0.272251	0.211567	-0.0606838	2	1	2156	2	2306
NM_001024616	B230208H17Rik	chr2_25461966-25465967	TSS11728	27.061	28.1432	31.016	1	0.0565692	0.196791	0.140222	2	1	1000	1	1175
NM_029859	4921530D09Rik	chr2_25471198-25475199	TSS11729	0	0	0	1	0	0	0	2	3	1400	1	1000
NM_001109993	Tmem141	chr2_25475525-25479526	TSS11730	2.13383	2.26356	2.11418	2	0.0851109	-0.013338	-0.098449	1	0	0	1	700
NM_001115076	Camsap1	chr2_25836802-25840803	TSS11734	11.7509	11.3747	11.1853	1	-0.0469387	-0.0711611	-0.0242224	1	0	0	2	2025
NM_133835	Ubac1	chr2_25875280-25879281	TSS11735	16.9908	15.6071	17.4085	1	-0.122544	0.0350361	0.15758	1	0	0	1	1575
NM_001037098	Nacc2	chr2_25945916-25949917	TSS11736	0	0.136743	0.0528361	1	7.10584	5.7505	-1.35533	1	0	0	1	1575
NM_026495	Nacc2	chr2_25976331-25980332	TSS11737	2.62701	2.52385	2.91316	1	-0.0577731	0.149109	0.206882	2	1	250	1	1800
NM_001039653	Lhx3	chr2_26060076-26064077	TSS11738	0.10029	0.17781	0.166965	1	0.819936	0.729669	-0.0902668	2	1	3175	1	875
NM_153559	Qsox2	chr2_26090940-26094941	TSS11739	6.78625	6.586	5.94679	1	-0.0432056	-0.190473	-0.147268	1	0	0	1	1075
NM_026725	Dusp23	chr1_174561105-174565106	TSS1174	0.538222	0.459989	0.609031	1	-0.226147	0.178003	0.40415	1	0	0	2	1250
NM_001139503	Dnlz	chr2_26205630-26209631	TSS11741	6.16121	6.30345	5.02033	3	0.0329238	-0.295379	-0.328302	1	0	0	1	1825
NM_172339	Snapc4	chr2_26234173-26238174	TSS11743	8.30403	8.21229	9.15292	2	-0.0160258	0.140404	0.15643	1	0	0	1	950
NM_001085407	Sdccag3	chr2_26242836-26246837	TSS11744	16.2681	15.2869	16.5991	3	-0.0897386	0.0290558	0.118794	1	0	0	1	1875
NM_033134	Inpp5e	chr2_26262708-26266709	TSS11745	2.71241	2.77338	2.87465	1	0.0320583	0.083781	0.0517227	1	0	0	1	1225
NM_153125	Sec16a	chr2_26298736-26302737	TSS11746	15.7243	15.1204	17.0632	1	-0.0564958	0.117885	0.174381	1	0	0	2	2650
NM_008714	Notch1	chr2_26357342-26361343	TSS11747	8.83968	8.0468	7.7747	1	-0.135563	-0.185185	-0.0496219	1	0	0	1	3083
NM_026212	Agpat2	chr2_26457730-26461731	TSS11748	10.9424	10.5419	9.35067	1	-0.0537893	-0.226765	-0.172976	1	0	0	1	2175
NR_024068	Snhg7	chr2_26493764-26497765	TSS11749	11.3581	10.1639	13.6466	1	-0.160253	0.264799	0.425051	1	0	0	1	2661
NR_028572	Snora43	chr2_26491505-26495506	TSS11750	5.43093	9.60591	3.58079	1	0.822608	-0.600784	-1.42339	1	0	0	3	2681
NR_028571	Snora17	chr2_26492841-26496842	TSS11751	12.3879	19.2427	3.92481	1	0.635338	-1.65799	-2.29332	1	0	0	1	3425
NM_009298	Surf6	chr2_26756333-26760334	TSS11754	25.0665	29.831	24.1806	1	0.251043	-0.0519084	-0.302951	1	0	0	1	2700
NM_011513	Med22	chr2_26764162-26768163	TSS11755	8.8903	9.22506	9.54632	2	0.0533203	0.102701	0.0493811	1	0	0	2	3676
NM_013677	Surf1	chr2_26770050-26774051	TSS11756	15.2436	16.3524	15.6554	1	0.101292	0.0384542	-0.0628381	1	0	0	1	2450
NM_011512	Surf4	chr2_26787031-26791032	TSS11757	47.4823	50.353	57.3861	1	0.0846862	0.273306	0.18862	1	0	0	1	1875
NM_207234	Rexo4	chr2_26817906-26821907	TSS11758	15.4037	15.9854	14.0263	1	0.0534745	-0.135133	-0.188608	1	0	0	1	2100
NM_001177627	Slc2a6	chr2_26881518-26885519	TSS11759	0.435841	0.733608	0.2119	2	0.749866	-1.03693	-1.7868	1	0	0	1	700
NM_175427	Fam163b	chr2_26995997-26999998	TSS11762	0.586841	1.23528	1.05632	1	1.07251	0.846914	-0.225593	2	3	1225	1	750
NM_009500	Vav2	chr2_27280345-27284346	TSS11764	6.48778	6.58827	6.89201	1	0.0221714	0.0871869	0.0650155	1	0	0	1	2500
NM_001113574	Brd3	chr2_27329193-27333194	TSS11765	0	1.01148	2.36177	3	9.98368	11.2063	1.22258	1	0	0	1	2825
NM_001113573	Brd3	chr2_27329193-27333194	TSS11766	30.9294	35.9474	26.7078	2	0.216901	-0.211708	-0.428609	1	0	0	1	2825
NM_027040	1700007K13Rik	chr2_28319844-28323845	TSS11768	10.6328	6.33532	12.9024	1	-0.74694	0.279094	1.02603	1	0	0	2	1795
NM_148928	Gtf3c5	chr2_28436799-28440800	TSS11770	9.1943	10.2405	8.61756	1	0.155458	-0.0934498	-0.248908	1	0	0	1	1125
NM_027283	1700026L06Rik	chr2_28553171-28557172	TSS11772	0.325912	0.0796436	0.0994806	1	-2.01927	-1.70199	0.317285	1	0	0	1	1400
NM_172977	Gtf3c4	chr2_28693880-28697881	TSS11773	14.5429	15.3122	17.4593	2	0.0743581	0.263662	0.189304	1	0	0	2	2025
NM_019446	Barhl1	chr2_28769941-28773942	TSS11774	0.102884	0.107045	0.0318419	2	0.0566658	-1.66136	-1.71802	2	2	3476	3	1325
NM_001166705	1700101E01Rik	chr2_28908586-28912587	TSS11775	1.69894	1.1819	0.741165	2	-0.523154	-1.19567	-0.672517	1	0	0	1	1200
NM_133501	Ntng2	chr2_29101560-29105561	TSS11776	0.248022	0.0983402	0.3243	3	-1.32582	0.385499	1.71132	-1	2	1386	0	0
NR_029460	6530402F18Rik	chr2_29106513-29110514	TSS11777	0.0424298	0.0155179	0.182339	3	-1.39466	2.07775	3.47241	2	2	3537	1	2625
NM_145520	Trub2	chr2_29641191-29645192	TSS11778	16.1488	15.8477	16.8807	2	-0.0271527	0.0639413	0.091094	1	0	0	1	2675
NR_029838	Mir219-2	chr2_29699247-29703248	TSS11779	0	0	0	1	0	0	0	2	2	850	1	1650
NM_001008498	Wdr34	chr2_29902399-29906400	TSS11780	16.6911	17.5583	14.8228	1	0.0730699	-0.17125	-0.24432	1	0	0	1	2250
NM_025428	Zdhhc12	chr2_29947155-29951156	TSS11781	16.3086	15.0039	17.3519	2	-0.120288	0.0894578	0.209745	1	0	0	1	2775
NM_178694	Zer1	chr2_29977974-29981975	TSS11782	8.19002	5.69527	7.61601	1	-0.524026	-0.104818	0.419207	1	0	0	1	1650
NM_172660	D2Wsu81e	chr2_30031979-30035980	TSS11783	26.046	27.5025	25.6501	1	0.078498	-0.0220965	-0.100595	1	0	0	1	1300
NM_172404	Ccbl1	chr2_30059219-30063220	TSS11784	3.87733	3.37376	4.75219	1	-0.200651	0.293461	0.494111	1	0	0	1	1900
NR_028299	1700084E18Rik	chr2_30091151-30095152	TSS11785	0	0	0.210742	1	0	7.72616	7.72616	1	0	0	1	2375
NM_177648	Dolk	chr2_30139874-30143875	TSS11786	2.64277	2.45685	1.91695	1	-0.1052	-0.463032	-0.357832	1	0	0	2	2450
NM_139302	Sh3glb2	chr2_30212751-30216752	TSS11787	12.6231	9.94672	10.6294	1	-0.343743	-0.247985	0.0957581	1	0	0	1	1400
NM_007760	Crat	chr2_30269268-30273269	TSS11788	2.52506	1.7926	2.83594	1	-0.494031	0.167447	0.661477	1	0	0	1	2275
NM_030244	Ier5l	chr2_30327719-30331720	TSS11789	11.05	9.49016	10.5675	1	-0.219521	-0.0644063	0.155114	1	0	0	1	3731
NM_198000	1700001O22Rik	chr2_30655257-30659258	TSS11790	0.614621	0.7222	0.656463	3	0.232353	0.0948669	-0.137486	1	0	0	1	1225
NR_028486	1700001O22Rik	chr2_30657184-30661185	TSS11791	0.445324	0.389504	0.264934	2	-0.192754	-0.747023	-0.554269	1	0	0	1	366
NM_133346	Asb6	chr2_30681820-30685821	TSS11792	8.44906	11.7726	8.95047	1	0.478522	0.083163	-0.395359	1	0	0	1	2075
NM_022415	Ptges	chr2_30756817-30760818	TSS11793	4.51115	3.69462	6.85036	1	-0.287999	0.602575	0.890574	1	0	0	1	1500
NM_144884	Tor1a	chr2_30821438-30825439	TSS11794	12.542	12.0382	12.7943	1	-0.0591429	0.0287315	0.0878744	1	0	0	1	1350
NM_144885	BC005624	chr2_30835461-30839462	TSS11795	20.7725	23.3487	21.1332	1	0.16866	0.0248352	-0.143825	1	0	0	1	1975
NM_001177648	Fnbp1	chr2_30995528-30999529	TSS11796	1.96211	2.28954	2.35216	5	0.222544	0.261458	0.0389144	1	0	0	2	2225
NM_001038700	Fnbp1	chr2_30995528-30999529	TSS11797	14.8038	13.195	10.6208	4	-0.16596	-0.479033	-0.313073	1	0	0	2	2225
NM_183424	Qrfp	chr2_31664038-31668039	TSS11798	0.0655499	0.0323887	0.0323221	1	-0.995077	-0.997957	-0.0028806	1	0	0	1	600
NM_178887	Fibcd1	chr2_31699525-31703526	TSS11799	0	0	0.00633205	1	0	2.87422	2.87422	2	1	2550	1	1575
NM_001039710	Coq10b	chr1_55107613-55111614	TSS118	9.97278	9.77217	9.87426	2	-0.0293149	-0.0143223	0.0149926	1	0	0	2	1450
NM_053199	Cadm3	chr1_175295826-175299827	TSS1180	0.241924	0.25674	0.161079	1	0.0854114	-0.583808	-0.669219	2	3	1199	1	2125
NM_175511	Fam78a	chr2_31937225-31941226	TSS11800	1.44852	1.62906	1.23099	1	0.16935	-0.234585	-0.403935	2	1	2075	1	2450
NM_011675	Uck1	chr2_32113625-32117626	TSS11801	13.1759	14.0697	15.3662	1	0.0946831	0.221843	0.12716	1	0	0	1	1550
NM_175190	Swi5	chr2_32141588-32145589	TSS11802	86.6393	77.6085	98.173	1	-0.158805	0.180303	0.339108	1	0	0	2	2725
NM_010065	Dnm1	chr2_32206824-32210825	TSS11803	7.27242	6.91671	7.25443	1	-0.0723394	-0.00357277	0.0687666	2	1	975	1	1575
NM_198001	1110008P14Rik	chr2_32235435-32239436	TSS11804	6.39301	4.45718	9.31747	1	-0.520266	0.543372	1.06364	2	1	25	1	1200
NM_001164358	Slc25a25	chr2_32284671-32288672	TSS11806	0.295762	0.034291	0.136152	1	-3.07193	-1.11353	1.9584	1	0	0	1	700
NM_001164357	Slc25a25	chr2_32304990-32308991	TSS11807	7.81087	9.48541	8.31447	2	0.280194	0.0901293	-0.190065	1	0	0	2	2475
NM_010236	Fpgs	chr2_32547695-32551696	TSS11808	19.9196	20.8076	17.8398	1	0.0629188	-0.159081	-0.222	1	0	0	1	2600
NM_130860	Cdk9	chr2_32566304-32570305	TSS11809	23.7619	25.6593	21.3406	1	0.110827	-0.155043	-0.26587	1	0	0	1	2775
NM_177384	Ttc16	chr2_32628903-32632904	TSS11810	0.315124	0.475413	0.225892	1	0.591722	-0.478485	-1.07021	1	0	0	1	1725
NM_009295	Stxbp1	chr2_32700752-32704753	TSS11812	8.23583	7.82241	6.42693	2	-0.0742916	-0.357734	-0.283442	2	1	50	1	1550
NM_199302	Lrsam1	chr2_32814775-32818776	TSS11813	2.76599	2.73118	2.78259	1	-0.0182649	0.0086293	0.0268942	1	0	0	2	3201
NM_019488	Slc2a8	chr2_32835576-32839577	TSS11814	4.68817	4.90082	7.00257	1	0.0639849	0.578758	0.514773	1	0	0	1	2425
NM_175211	Ralgps1	chr2_33224998-33228999	TSS11816	3.11674	2.75999	2.47122	1	-0.175315	-0.334693	-0.159379	1	0	0	1	1500
NM_001085507	Zbtb34	chr2_33284844-33288845	TSS11817	7.7024	7.1742	7.06675	1	-0.102476	-0.124244	-0.021768	1	0	0	1	2700
NM_027947	Zbtb43	chr2_33322052-33326053	TSS11818	9.67751	8.43665	8.75434	2	-0.197944	-0.144622	0.053322	1	0	0	1	1375
NM_010725	Lmx1b	chr2_33494031-33498032	TSS11819	0.922878	0.790063	0.73898	1	-0.22391	-0.320216	-0.0963063	2	2	3451	3	2832
NM_175184	Fam125b	chr2_33741466-33745467	TSS11820	1.81624	1.89444	1.87168	1	0.0607838	0.0433554	-0.0174284	1	0	0	1	1550
NM_016768	Pbx3	chr2_34225556-34229557	TSS11821	2.56672	2.80014	2.49727	1	0.125526	-0.0395585	-0.165085	2	1	75	1	3250
NM_025709	Gapvd1	chr2_34608752-34612753	TSS11822	14.2398	14.7312	13.5808	1	0.0489427	-0.0683555	-0.117298	1	0	0	1	1600
NM_145522	Rabepk	chr2_34653432-34657433	TSS11823	11.925	13.8637	17.4758	1	0.217306	0.551331	0.334025	1	0	0	2	1283
NM_001164768	Fbxw2	chr2_34676701-34680702	TSS11824	10.6154	10.5182	13.9523	1	-0.0132696	0.394312	0.407581	0	0	0	0	0
NM_001164770	Fbxw2	chr2_34679755-34683756	TSS11825	11.3776	13.1728	9.47122	7	0.211352	-0.26455	-0.475901	1	0	0	2	1475
NM_080554	Psmd5	chr2_34724482-34728483	TSS11826	23.9723	23.3964	23.1441	1	-0.0350803	-0.0507217	-0.0156414	1	0	0	2	1675
NM_028716	Phf19	chr2_34767496-34771497	TSS11827	3.45695	3.65692	4.39185	1	0.0811065	0.34524	0.264134	2	1	1250	1	2250
NM_009421	Traf1	chr2_34815292-34819293	TSS11828	0.300775	0.329924	0.427054	1	0.133027	0.50432	0.371293	1	0	0	2	818
NM_026697	Rab14	chr2_35054640-35058641	TSS11831	38.526	35.3169	36.9516	1	-0.12547	-0.060194	0.0652763	1	0	0	1	1950
NM_013515	Stom	chr2_35190529-35194530	TSS11832	9.71461	6.53807	15.2809	1	-0.571219	0.653447	1.22467	1	0	0	1	1250
NM_001145821	Ggta1	chr2_35314945-35318946	TSS11834	8.84274	8.22888	15.835	2	-0.103785	0.84048	0.944266	1	0	0	1	2825
NM_029774	Ttll11	chr2_35833144-35837145	TSS11835	0.218853	0.0588622	0.161036	2	-1.87682	-0.440224	1.43659	1	0	0	1	1375
NM_026703	Ndufa8	chr2_35902812-35906813	TSS11836	46.5233	51.6955	49.8461	1	0.152082	0.0995251	-0.052557	1	0	0	1	700
NM_001083127	Lhx6	chr2_35957580-35961581	TSS11837	0.550364	0.447394	0.515016	2	-0.298239	-0.0955893	0.20265	2	1	4001	3	2895
NM_008500	Lhx6	chr2_35958928-35962929	TSS11838	0	0	0	2	0	0	0	2	1	3522	2	1772
NR_027515	Rbm18	chr2_35990224-35994225	TSS11839	12.917	13.4265	12.2163	3	0.0558064	-0.0804601	-0.136267	1	0	0	1	1100
NM_026176	Pdcl	chr2_37212852-37216853	TSS11848	37.6875	36.1712	37.1907	1	-0.059243	-0.0191437	0.0400993	1	0	0	1	1125
NM_001100591	Rc3h2	chr2_37276423-37280424	TSS11849	11.1997	11.6493	8.48338	1	0.0567782	-0.400708	-0.457486	1	0	0	1	1150
NM_146253	Zbtb6	chr2_37284439-37288440	TSS11851	7.71312	7.18956	7.87063	1	-0.101397	0.0291608	0.130558	1	0	0	1	1500
NM_199025	Zbtb26	chr2_37296641-37300642	TSS11852	3.32989	3.39247	3.42849	1	0.0268535	0.0420863	0.0152328	1	0	0	2	1350
NM_146122	Dennd1a	chr2_38140904-38144905	TSS11854	2.87423	3.10645	2.64243	1	0.112054	-0.121266	-0.23332	1	0	0	1	1300
NM_011187	Psmb7	chr2_38497426-38501427	TSS11855	247.588	269.272	226.694	1	0.121122	-0.127195	-0.248317	1	0	0	1	1300
NM_139051	Nr5a1	chr2_38568062-38572063	TSS11856	0.0156639	0	0.0100399	1	-4.05865	-0.593999	3.46466	-1	1	913	0	0
NM_010264	Nr6a1	chr2_38779981-38783982	TSS11858	13.1799	7.39185	5.29531	3	-0.834244	-1.31539	-0.481144	1	0	0	1	2225
NM_025592	Rpl35	chr2_38858651-38862652	TSS11859	939.127	790.435	1049.9	1	-0.248673	0.16086	0.409533	1	0	0	2	3476
NM_029793	Golga1	chr2_38918926-38922927	TSS11860	2.23158	1.85642	1.47813	1	-0.265412	-0.593963	-0.328551	1	0	0	1	1200
NM_178778	Scai	chr2_39044250-39048251	TSS11861	2.69072	2.59504	2.38477	1	-0.0522157	-0.174073	-0.121858	1	0	0	2	1075
NM_024209	Ppp6c	chr2_39079858-39083859	TSS11863	25.7491	23.2201	21.1057	1	-0.149142	-0.286877	-0.137735	1	0	0	1	1125
NM_053011	Lrp1b	chr2_42507118-42511119	TSS11864	0	0.00760792	0	1	3.10566	0	-3.10566	2	1	100	1	875
NM_015753	Zeb2	chr2_44966799-44970800	TSS11866	1.42994	0.806132	1.86364	1	-0.826087	0.381934	1.20802	2	4	976	1	25
NR_033442	Orc4	chr2_48802787-48806788	TSS11867	17.4755	14.7995	19.2329	3	-0.23977	0.138232	0.378002	1	0	0	2	1925
NM_133839	Mmadhc	chr2_50150197-50154198	TSS11868	34.2818	30.4504	29.4171	1	-0.170976	-0.220781	-0.0498045	1	0	0	2	1475
NM_028810	Rnd3	chr2_51002631-51006632	TSS11869	18.6195	15.363	23.8972	1	-0.277338	0.36001	0.637348	1	0	0	1	2069
NM_001141982	Rbm43	chr2_51788164-51792165	TSS11870	0	0.000195389	6.77481e-05	1	0.25748	0.0945713	-0.162909	1	0	0	1	825
NM_001141981	Rbm43	chr2_51788529-51792530	TSS11871	1.60098	1.46345	1.57087	2	-0.129496	-0.0273752	0.102121	1	0	0	1	825
NM_001141948	Nmi	chr2_51826728-51830729	TSS11872	1.0505	0.951529	0.831827	3	-0.142612	-0.336358	-0.193746	1	0	0	1	450
NM_182994	Arl5a	chr2_52278394-52282395	TSS11874	14.6962	15.5076	12.6972	1	0.0775271	-0.210917	-0.288444	1	0	0	1	2025
NM_001037099	Cacnb4	chr2_52530101-52534102	TSS11876	1.32949e-06	2.34638e-06	6.08197e-06	1	0.00146437	0.00683108	0.00536671	2	1	1249	1	1925
NM_019667	Stam2	chr2_52599183-52603184	TSS11877	10.4859	10.045	10.6927	1	-0.0619671	0.0281728	0.0901399	1	0	0	2	1925
NM_018785	Prpf40a	chr2_53048221-53052222	TSS11878	64.1388	61.4035	56.6538	1	-0.0628755	-0.179022	-0.116146	1	0	0	2	2475
NM_023396	Rprm	chr2_53935963-53939964	TSS11879	1.03069	1.57174	2.03654	1	0.608271	0.981819	0.373548	2	2	800	1	1850
NM_013613	Nr4a2	chr2_56965449-56969450	TSS11880	0.17906	0	0.0453498	1	-7.49233	-1.95784	5.53449	2	3	2851	1	2975
NM_001139509	Nr4a2	chr2_56974414-56978415	TSS11881	0.540128	0.831148	0.487426	1	0.62087	-0.14783	-0.7687	1	0	0	1	1575
NM_001033369	Acvr1c	chr2_58175218-58179219	TSS11884	0.0232563	0	0	1	-4.60029	-4.60029	0	1	0	0	1	425
NM_001111030	Acvr1c	chr2_58208169-58212170	TSS11885	3.69863e-06	0	0	1	-0.00532615	-0.00532615	0	2	2	1225	1	1100
NM_001110205	Acvr1	chr2_58417239-58421240	TSS11886	4.59361	4.06126	4.32006	3	-0.177659	-0.0885579	0.0891013	1	0	0	1	2000
NM_001001178	Ccdc148	chr2_58996684-59000685	TSS11887	0.303354	0.318359	0.21207	1	0.0694288	-0.514423	-0.583852	1	0	0	1	2575
NM_001159636	Wdsub1	chr2_59718663-59722664	TSS11888	8.29263	8.53235	8.45146	2	0.0411085	0.0273676	-0.0137409	1	0	0	2	1375
NM_001001182	Baz2b	chr2_59961797-59965798	TSS11889	6.21313	5.06876	3.66978	1	-0.293635	-0.759466	-0.465831	1	0	0	1	1300
NM_025422	Cd302	chr2_60120475-60124476	TSS11890	1.02958	1.7215	1.36154	1	0.741047	0.402842	-0.338205	1	0	0	1	700
NM_013825	Ly75	chr2_60219288-60223289	TSS11891	8.31832	9.10277	8.44144	1	0.129998	0.0211944	-0.108804	1	0	0	2	1225
NM_008867	Pla2r1	chr2_60389365-60393366	TSS11892	0.085162	0.0662706	0.0819285	1	-0.357076	-0.0551837	0.301892	1	0	0	1	850
NM_001141932	Rbms1	chr2_60717495-60721496	TSS11895	16.2358	13.623	19.971	3	-0.253115	0.298715	0.551829	1	0	0	2	1275
NM_020296	Rbms1	chr2_60799261-60803262	TSS11896	3.99042	4.02026	5.31086	2	0.0107442	0.412314	0.40157	1	0	0	1	1800
NM_001159543	Dpp4	chr2_62248288-62252289	TSS11897	1.97324	2.55748	2.39078	2	0.373987	0.276787	-0.0971994	1	0	0	1	1275
NM_008303	Hspe1	chr1_55142991-55146992	TSS119	323.118	428.719	328.927	1	0.40797	0.0257062	-0.382264	1	0	0	2	3559
NM_027835	Ifih1	chr2_62482312-62486313	TSS11900	0.293146	0.110559	0.334426	2	-1.39873	0.189461	1.58819	1	0	0	1	775
NM_133207	Kcnh7	chr2_63020344-63024345	TSS11901	0.045517	0.0415276	0	1	-0.129359	-5.53969	-5.41033	1	0	0	1	1250
NM_021716	Fign	chr2_63934069-63938070	TSS11902	0.709479	0.758941	0.511347	1	0.0970954	-0.471671	-0.568766	1	0	0	2	1550
NM_016719	Grb14	chr2_64858823-64862824	TSS11903	1.44535	1.61915	2.91886	1	0.163711	1.01348	0.849772	2	1	625	1	1175
NM_027225	Cobll1	chr2_65074683-65078684	TSS11904	1.44588	1.0342	1.20981	2	-0.483034	-0.256972	0.226062	1	0	0	1	1750
NM_177074	Slc38a11	chr2_65200083-65204084	TSS11905	0	0	0	1	0	0	0	1	0	0	1	550
NM_018732	Scn3a	chr2_65403549-65407550	TSS11906	0.32988	0.401328	0.188086	1	0.282064	-0.807266	-1.08933	0	0	0	0	0
NM_015736	Galnt3	chr2_65960850-65964851	TSS11907	0.985618	1.43351	1.63718	1	0.539995	0.73153	0.191536	2	1	525	1	1675
NM_001047604	Ttc21b	chr2_66092674-66096675	TSS11908	6.31989	7.51175	6.2901	1	0.249213	-0.00681541	-0.256029	1	0	0	1	1025
NM_018733	Scn1a	chr2_66276894-66280895	TSS11909	0.0413562	0.0817059	0.0553957	1	0.965417	0.413012	-0.552405	1	0	0	1	200
NM_011825	Grem2	chr1_176849950-176853951	TSS1191	0.0952767	0.0302603	0.101602	1	-1.62286	0.0918003	1.71466	1	0	0	1	500
NM_018852	Scn9a	chr2_66471009-66475010	TSS11910	0.0174526	0.0891279	0.0577627	1	2.28815	1.67108	-0.617073	1	0	0	1	1025
NM_016866	Stk39	chr2_68308038-68312039	TSS11912	2.92248	2.82303	2.73489	1	-0.0499313	-0.0956765	-0.0457452	2	3	1512	1	1950
NM_025565	Spc25	chr2_69042247-69046248	TSS11913	49.2839	46.6248	49.9811	1	-0.0800172	0.0202658	0.100283	1	0	0	1	975
NM_001081088	Lrp2	chr2_69422124-69426125	TSS11915	5.28667	6.05737	6.62431	1	0.196298	0.325356	0.129058	2	2	625	1	3725
NM_177244	Fastkd1	chr2_69548663-69552664	TSS11916	10.2036	8.67277	10.109	1	-0.234489	-0.0134366	0.221052	1	0	0	1	675
NM_001077684	4930578N16Rik	chr2_69625543-69629544	TSS11917	0.882024	0.561796	0.806464	1	-0.649841	-0.129055	0.520786	1	0	0	1	925
NM_029280	Mettl5	chr2_69721661-69725662	TSS11918	37.9229	36.5354	42.9385	1	-0.0537728	0.179198	0.232971	1	0	0	2	1100
NM_172664	Tlk1	chr2_70661537-70665538	TSS11919	30.2175	31.2005	26.7083	1	0.0461833	-0.17809	-0.224273	1	0	0	1	1775
NM_011880	Rgs7	chr1_177420676-177424677	TSS1192	0.0184923	0.0174475	0.0113862	1	-0.079479	-0.654171	-0.574692	2	2	175	1	1325
NM_145524	Mettl8	chr2_70891663-70895664	TSS11921	2.96709	3.40475	2.06615	3	0.198438	-0.521892	-0.720329	1	0	0	2	1800
NM_172436	Slc25a12	chr2_71203611-71207612	TSS11922	7.18919	6.68506	7.62775	1	-0.104874	0.0854168	0.19029	1	0	0	1	1100
NR_002854	Dlx1as	chr2_71373948-71377949	TSS11923	0.0849741	0.108482	0	1	0.34872	-6.42583	-6.77455	2	2	3601	1	825
NM_010054	Dlx2	chr2_71382811-71386812	TSS11924	0.249827	0.30712	0.193442	1	0.2968	-0.367353	-0.664152	2	2	2139	2	1939
NM_001098425	Sp3	chr2_72815338-72819339	TSS11925	12.9656	15.3513	17.6171	1	0.243655	0.442258	0.198604	1	0	0	2	2850
NM_001018042	Sp3	chr2_72816503-72820504	TSS11926	14.2518	12.0254	12.6209	1	-0.245041	-0.175316	0.0697242	1	0	0	1	2700
NM_025942	Ola1	chr2_73050504-73054505	TSS11927	58.078	61.2108	61.0109	2	0.0757922	0.0710745	-0.00471772	1	0	0	1	1575
NM_025854	Cir1	chr2_73148649-73152650	TSS11928	13.6424	11.4638	12.6203	1	-0.250992	-0.112343	0.138649	1	0	0	1	1625
NM_001080707	Gpr155	chr2_73222455-73226456	TSS11929	0.535744	0.470754	0.443357	2	-0.186199	-0.272515	-0.0863155	2	1	25	1	1325
NM_010209	Fh1	chr1_177553766-177557767	TSS1193	54.5587	51.858	59.2444	1	-0.0732413	0.118867	0.192109	1	0	0	1	1025
NM_153138	Wipf1	chr2_73365467-73369468	TSS11930	2.89606	4.28235	3.54175	1	0.56415	0.29028	-0.27387	1	0	0	1	1550
NM_001113246	Chn1	chr2_73611403-73615404	TSS11934	5.69074	4.76192	5.41183	2	-0.257024	-0.0724867	0.184537	1	0	0	1	1475
NM_001025093	Atf2	chr2_73728685-73732686	TSS11935	23.4731	24.59	22.0557	2	0.0670606	-0.0898555	-0.156916	1	0	0	2	2425
NM_175015	Atp5g3	chr2_73747351-73751352	TSS11936	183.155	256.806	217.737	1	0.487612	0.24952	-0.238091	1	0	0	1	1400
NM_001110209	Lnp	chr2_74415005-74419006	TSS11937	5.67124	6.05232	7.13615	2	0.093808	0.33143	0.237621	1	0	0	1	1475
NM_007967	Evx2	chr2_74495476-74499477	TSS11938	0	0	0	1	0	0	0	2	1	4001	3	825
NR_027899	1700109F18Rik	chr2_74552187-74556188	TSS11939	0.0454889	0	0	1	-5.53881	-5.53881	0	2	1	1013	1	325
NM_010098	Opn3	chr1_177620721-177624722	TSS1194	1.52901	1.16166	0.828183	1	-0.396112	-0.883779	-0.487667	1	0	0	2	1250
NM_010902	Nfe2l2	chr2_75540698-75544699	TSS11940	30.4869	28.0561	34.5104	1	-0.119871	0.178836	0.298707	1	0	0	1	2150
NM_028235	Ttc30b	chr2_75774519-75778520	TSS11941	0.545898	0.579474	0.521815	1	0.0859597	-0.0649713	-0.150931	1	0	0	1	1100
NM_001081228	Ttc30a2	chr2_75814236-75818237	TSS11942	0.438752	0.549007	0.289937	1	0.32276	-0.595983	-0.918743	1	0	0	1	25
NM_030188	Ttc30a1	chr2_75818024-75822025	TSS11943	1.31727	1.13307	0.652413	1	-0.217136	-1.01258	-0.795443	1	0	0	1	600
NM_001081033	Pde11a	chr2_76174710-76178711	TSS11944	0.216613	0.0951781	0.0951179	1	-1.17798	-1.17889	-0.000903297	2	1	400	1	1050
NM_009989	Cyct	chr2_76196505-76200506	TSS11945	24.2006	21.5401	19.511	1	-0.168011	-0.310741	-0.14273	1	0	0	1	625
NM_011871	Prkra	chr2_76484051-76488052	TSS11946	7.27074	7.66082	10.2769	1	0.0753865	0.499173	0.423786	1	0	0	1	1825
NM_010222	Fkbp7	chr2_76509155-76513156	TSS11947	2.49437	1.98198	4.44643	1	-0.331584	0.833718	1.1653	1	0	0	2	1156
NM_001025576	Ccdc141	chr2_77006692-77010693	TSS11949	1.07938	0.491504	1.23974	1	-1.13333	0.199662	1.33299	1	0	0	2	1650
NM_175465	Sestd1	chr2_77116649-77120650	TSS11950	7.96135	7.21909	7.35418	1	-0.141177	-0.114434	0.0267438	1	0	0	1	1400
NM_001113400	Zfp385b	chr2_77355723-77359724	TSS11951	0.278269	0.0598981	0.0444941	1	-2.19719	-2.6179	-0.420718	0	0	0	0	0
NM_178723	Zfp385b	chr2_77652873-77656874	TSS11953	0	0	0	1	0	0	0	2	5	2152	1	1325
NM_030560	Cwc22	chr2_77782410-77786411	TSS11954	15.2944	14.1474	13.2172	1	-0.112459	-0.210572	-0.0981132	1	0	0	1	1450
NM_001048176	Cerkl	chr2_79267145-79271146	TSS11955	0.374803	0.213686	0.34971	1	-0.807748	-0.099698	0.70805	1	0	0	1	750
NM_010894	Neurod1	chr2_79294793-79298794	TSS11956	5.64138	5.65526	11.8473	1	0.00354461	1.0703	1.06676	2	2	525	2	1157
NM_176916	Pld5	chr1_178203443-178207444	TSS1196	0.0784291	0.017094	0.0248093	1	-2.13416	-1.62178	0.51238	2	3	2500	1	1325
NM_011356	Frzb	chr2_80285553-80289554	TSS11960	0.215384	0.393602	1.02865	1	0.866804	2.25049	1.38368	2	1	2225	2	1900
NM_016965	Nckap1	chr2_80419122-80423123	TSS11961	54.0661	53.1901	56.3431	1	-0.0235661	0.0595136	0.0830797	1	0	0	1	1525
NM_027964	Zswim2	chr2_83779383-83783384	TSS11963	0.0294066	0.0256105	0	1	-0.192389	-4.92631	-4.73392	1	0	0	1	400
NM_011576	Tfpi	chr2_84312331-84316332	TSS11965	0.613786	3.0345	8.21507	3	2.30378	3.74029	1.43652	1	0	0	3	1507
NM_001177320	Tfpi	chr2_84314932-84318933	TSS11966	11.2136	9.55038	21.6487	4	-0.231601	0.948966	1.18057	1	0	0	2	1118
NM_001085453	Ctnnd1	chr2_84488667-84492668	TSS11967	15.7105	0	12.3701	1	-13.9395	-0.344847	13.5947	1	0	0	3	1383
NM_001085450	Ctnnd1	chr2_84488897-84492898	TSS11968	34.8417	50.4445	35.953	7	0.533871	0.0452952	-0.488575	1	0	0	2	1250
NM_001037279	2700094K13Rik	chr2_84508865-84512866	TSS11969	112.907	105.985	178.529	2	-0.0912698	0.661016	0.752286	1	0	0	1	2225
NM_025868	Tmx2	chr2_84516204-84520205	TSS11970	40.6702	34.6258	58.0416	1	-0.232118	0.513105	0.745223	1	0	0	2	1500
NM_144887	Zdhhc5	chr2_84553321-84557322	TSS11971	11.9412	12.6336	8.85413	1	0.0813114	-0.431483	-0.512795	1	0	0	1	2350
NM_133840	Clp1	chr2_84565425-84569426	TSS11972	32.6614	37.576	28.5566	1	0.202219	-0.193756	-0.395975	1	0	0	2	2025
NR_029544	Mir130a	chr2_84579335-84583336	TSS11973	0	0	0	1	0	0	0	1	0	0	1	3061
NM_009776	Serping1	chr2_84613586-84617587	TSS11974	4.61016	3.60595	9.00682	1	-0.35435	0.966048	1.3204	1	0	0	1	875
NM_199223	Rtn4rl2	chr2_84724849-84728850	TSS11976	0.198372	0.520144	0.238856	1	1.38622	0.266706	-1.11951	2	3	3201	1	2225
NM_145526	P2rx3	chr2_84873991-84877992	TSS11977	0.402307	0.332702	0.305861	1	-0.273318	-0.394293	-0.120975	1	0	0	1	1367
NM_001033346	Lrrc55	chr2_85034856-85038857	TSS11978	0.0490231	0	0	1	-5.64452	-5.64452	0	1	0	0	2	600
NM_178399	3110035E14Rik	chr1_9589347-9593348	TSS12	0	0.0328749	0	1	5.08214	0	-5.08214	1	0	0	1	325
NM_025283	Mob4	chr1_55186088-55190089	TSS120	22.622	24.4925	22.2738	1	0.114609	-0.0223778	-0.136986	1	0	0	5	1750
NM_007422	Adss	chr1_179724640-179728641	TSS1201	88.8676	81.2383	78.485	1	-0.129496	-0.179238	-0.0497425	1	0	0	2	1475
NM_016805	Hnrnpu	chr1_180265915-180269916	TSS1202	261.747	362.724	216.585	1	0.470698	-0.273239	-0.743936	1	0	0	1	2835
NM_027188	Smyd3	chr1_181446134-181450135	TSS1203	9.4795	10.2765	9.93369	1	0.116454	0.0675118	-0.0489425	1	0	0	1	1850
NM_008249	Tfb2m	chr1_181474398-181478399	TSS1204	10.8488	10.4416	7.75716	1	-0.0551875	-0.483882	-0.428695	1	0	0	1	1975
NM_026375	Ahctf1	chr1_181732146-181736147	TSS1205	31.5035	33.0316	29.8698	1	0.0683326	-0.076822	-0.145155	1	0	0	1	2275
NM_001163290	Adck3	chr1_182121616-182125617	TSS1206	0.500595	0	0.994935	1	-8.97038	0.989529	9.95991	1	0	0	1	392
NM_146650	Olfr1166	chr2_87963150-87967151	TSS12065	0	0	0	1	0	0	0	1	0	0	1	125
NM_023341	Adck3	chr1_182124151-182128152	TSS1207	2.14465	2.26711	2.27925	1	0.0800758	0.0877772	0.0077014	1	0	0	2	1175
NM_001128605	Psen2	chr1_182184431-182188432	TSS1209	3.69025	3.42499	1.67473	1	-0.107589	-1.13932	-1.03173	1	0	0	1	1500
NM_175439	Mars2	chr1_55292020-55296021	TSS121	2.99801	2.85031	2.46255	1	-0.0728614	-0.283748	-0.210886	1	0	0	2	2571
NR_003623	Gm5069	chr1_182258680-182262681	TSS1210	95.509	78.9419	118.778	1	-0.274842	0.314556	0.589398	2	3	1931	1	2056
NM_001081227	6330403A02Rik	chr1_182411635-182415636	TSS1211	0.0321004	0	0	1	-5.04878	-5.04878	0	2	1	1675	1	950
NM_013729	Mixl1	chr1_182625165-182629166	TSS1212	0.145122	0.1966	0.120473	1	0.43541	-0.266538	-0.701947	2	1	1200	1	1200
NM_008210	H3f3a	chr1_182741734-182745735	TSS1213	245.296	220.291	228.795	1	-0.155112	-0.100468	0.0546447	1	0	0	2	2650
NM_008982	Ptprj	chr2_90418804-90422805	TSS12132	0.690913	1.13742	0.603331	1	0.71837	-0.195252	-0.913622	2	1	25	1	2125
NM_026688	Ndufs3	chr2_90742878-90746879	TSS12133	43.1912	51.294	49.5127	1	0.248047	0.197057	-0.0509904	1	0	0	1	1075
NM_025576	Ptpmt1	chr2_90756207-90760208	TSS12134	5.56113	7.81442	6.8444	1	0.490686	0.299497	-0.191189	1	0	0	1	1400
NM_026721	Slc39a13	chr2_90908378-90912379	TSS12135	2.53678	2.32316	3.70759	1	-0.126858	0.547304	0.674161	1	0	0	2	2600
NM_001177720	Madd	chr2_91017478-91021479	TSS12136	2.03182	0.36624	0.344091	1	-2.46869	-2.55843	-0.0897464	1	0	0	1	375
NM_001177719	Madd	chr2_91021204-91025205	TSS12137	0	1.70893	0.554905	7	10.7397	9.11869	-1.62103	1	0	0	2	1825
NM_001177719	Madd	chr2_91021204-91025205	TSS12138	0	0.0407567	0	3	5.38394	0	-5.38394	1	0	0	2	1825
NM_001177730	Nr1h3	chr2_91033273-91037274	TSS12139	0.128943	0.249592	0.322173	2	0.947459	1.31442	0.366964	1	0	0	1	850
NM_010145	Ephx1	chr1_182945626-182949627	TSS1214	11.0897	6.52767	12.6036	1	-0.764489	0.1846	0.949089	1	0	0	1	1850
NM_028119	Ddb2	chr2_91075223-91079224	TSS12140	5.05347	5.3681	6.5792	1	0.0871205	0.380572	0.293451	1	0	0	1	1675
NM_175123	1110051M20Rik	chr2_91282799-91286800	TSS12141	3.69276	2.76083	2.75235	1	-0.419466	-0.423902	-0.00443651	1	0	0	1	425
NM_010168	F2	chr2_91474571-91478572	TSS12142	0.281903	0.230854	0.49002	1	-0.287091	0.795474	1.08257	1	0	0	1	1275
NM_001033451	Zfp408	chr2_91487948-91491949	TSS12143	4.22297	3.91919	4.28997	1	-0.107676	0.0227042	0.13038	1	0	0	2	2550
NM_145528	Atg13	chr2_91548749-91552750	TSS12144	18.3319	15.2932	17.7046	1	-0.26145	-0.0502293	0.211221	1	0	0	2	2800
NM_001012335	Mdk	chr2_91769856-91773857	TSS12145	156.599	155.926	243.697	2	-0.00620699	0.638017	0.644224	1	0	0	1	3782
NM_010784	Mdk	chr2_91770439-91774440	TSS12146	2.94562	4.10539	3.51748	1	0.47881	0.255891	-0.222918	1	0	0	1	3636
NM_138306	Dgkz	chr2_91801720-91805721	TSS12147	14.0185	14.4166	19.5852	1	0.0403961	0.482403	0.442006	1	0	0	3	1896
NM_001166597	Dgkz	chr2_91788505-91792506	TSS12148	0.846403	0.637302	1.2817	1	-0.408809	0.598064	1.00687	1	0	0	1	225
NM_011957	Creb3l1	chr2_91862327-91866328	TSS12149	2.98887	3.55438	3.18809	1	0.249921	0.0930621	-0.156859	1	0	0	1	1525
NM_026171	Nvl	chr1_183072288-183076289	TSS1215	38.0414	39.3051	42.3323	1	0.047145	0.154185	0.10704	1	0	0	1	2950
NM_001166633	Gyltl1b	chr2_92209193-92213194	TSS12150	8.86045	7.12516	8.13319	2	-0.314418	-0.123544	0.190874	1	0	0	3	1919
NM_011162	Mapk8ip1	chr2_92239420-92243421	TSS12151	10.2807	11.4943	10.0526	1	0.160965	-0.0323666	-0.193332	1	0	0	1	1175
NM_009963	Cry2	chr2_92272226-92276227	TSS12152	7.09445	6.18848	5.7481	2	-0.197075	-0.303558	-0.106482	1	0	0	3	1924
NM_211358	Slc35c1	chr2_92297951-92301952	TSS12153	2.66981	2.60088	1.83049	1	-0.0377229	-0.54426	-0.506537	1	0	0	1	2075
NM_145832	Slc35c1	chr2_92298675-92302676	TSS12154	0.632524	2.10718	3.17815	1	1.73453	2.32717	0.592643	1	0	0	1	2075
NM_001177536	Prdm11	chr2_92884301-92888302	TSS12155	0.40405	0.611396	0.551086	1	0.596365	0.446793	-0.149572	1	0	0	1	1525
NM_183180	Tspan18	chr2_93172644-93176645	TSS12156	0.429363	0.750222	0.539793	1	0.803685	0.329522	-0.474163	2	2	600	1	1475
NM_007656	Cd82	chr2_93300653-93304654	TSS12157	0.965565	1.45682	1.42754	1	0.592874	0.563603	-0.0292712	1	0	0	1	1350
NM_001136055	Cd82	chr2_93301103-93305104	TSS12158	0.438301	0	0.380541	1	-8.77907	-0.203372	8.57569	1	0	0	1	1350
NM_010163	Ext2	chr2_93660725-93664726	TSS12159	14.5653	13.0735	17.3309	1	-0.155879	0.250795	0.406674	1	0	0	1	1000
NM_145514	Wdr26	chr1_183140109-183144110	TSS1216	18.9413	20.4625	17.105	1	0.111441	-0.147109	-0.25855	1	0	0	1	2750
NM_183220	Accs	chr2_93687933-93691934	TSS12160	1.06608	0.939263	1.22854	1	-0.182532	0.20445	0.386982	1	0	0	1	1200
NM_001033452	Accsl	chr2_93707260-93711261	TSS12161	0.729557	0.29546	0.95574	1	-1.30116	0.38913	1.69029	1	0	0	2	1425
NM_001145034	Gm13889	chr2_93795257-93799258	TSS12162	0.698565	0.502849	2.52621	1	-0.473467	1.85302	2.32648	2	2	2893	1	2343
NM_026944	Alkbh3	chr2_93848887-93852888	TSS12163	4.30506	4.38342	5.13246	1	0.0260176	0.253563	0.227546	1	0	0	1	1525
NM_019657	Hsd17b12	chr2_93996066-94000067	TSS12164	55.9724	54.5205	58.2811	1	-0.0379161	0.0583115	0.0962276	1	0	0	1	700
NR_029752	Mir129-2	chr2_94079610-94083611	TSS12165	0	0	0	1	0	0	0	2	2	3426	2	1761
NR_030431	Mir670	chr2_94099556-94103557	TSS12166	0	0	0	1	0	0	0	1	0	0	1	107
NM_183106	Ttc17	chr2_94244846-94248847	TSS12167	3.76437	3.23033	4.68093	1	-0.220664	0.314312	0.534975	1	0	0	1	2300
NM_007466	Api5	chr2_94276304-94280305	TSS12168	61.0874	71.4569	57.7898	1	0.226195	-0.0800586	-0.306254	1	0	0	1	1300
NM_026592	B230118H07Rik	chr2_101467143-101471144	TSS12169	3.43872	3.62905	3.16253	1	0.0776983	-0.120756	-0.198454	1	0	0	1	700
NM_207280	Ccdc121	chr1_183439582-183443583	TSS1217	0	0.0451638	0	1	5.52869	0	-5.52869	1	0	0	1	350
NM_175181	Prr5l	chr2_101635864-101639865	TSS12171	1.49898	1.1981	1.27164	2	-0.322987	-0.237114	0.0858735	1	0	0	1	1975
NM_178886	Ldlrad3	chr2_102024534-102028535	TSS12173	8.71316	9.80176	8.13531	1	0.169826	-0.098987	-0.268813	1	0	0	1	1875
NM_020267	Trim44	chr2_102239057-102243058	TSS12174	10.9254	11.1703	11.8655	1	0.0319789	0.119076	0.0870974	1	0	0	1	1475
NM_010218	Fjx1	chr2_102289949-102293950	TSS12175	1.56644	1.75476	1.09458	1	0.163685	-0.516715	-0.680401	1	0	0	1	2601
NM_001039151	Cd44	chr2_102739822-102743823	TSS12176	8.35866	5.1513	8.17587	6	-0.698228	-0.0318956	0.666332	1	0	0	1	900
NM_175094	Pdhx	chr2_102911670-102915671	TSS12177	9.26701	9.3449	7.39256	1	0.012074	-0.32599	-0.338064	1	0	0	1	1225
NM_009804	Cat	chr2_103323310-103327311	TSS12179	28.3042	26.8427	28.3199	1	-0.0764836	0.000799996	0.0772836	1	0	0	1	1250
NM_133815	Lbr	chr1_183770532-183774533	TSS1218	78.8922	92.2236	72.265	1	0.225251	-0.126584	-0.351835	1	0	0	3	2233
NM_153126	Nat10	chr2_103599407-103603408	TSS12180	42.5783	44.1101	43.1283	1	0.0509895	0.0185161	-0.0324734	1	0	0	2	1525
NM_001111289	Caprin1	chr2_103635235-103639236	TSS12181	156.259	150.803	136.167	3	-0.0512719	-0.198554	-0.147282	1	0	0	2	2640
NM_016739	Caprin1	chr2_103635797-103639798	TSS12182	37.209	28.6595	33.3256	4	-0.376626	-0.159015	0.217611	1	0	0	1	2550
NM_001033347	D430041D05Rik	chr2_104248491-104252492	TSS12183	0.0564156	0.091503	0.0199625	1	0.688057	-1.45363	-2.14169	2	2	3192	1	1300
NM_010434	Hipk3	chr2_104332646-104336647	TSS12184	5.55093	5.1728	5.84412	2	-0.101765	0.0742441	0.176009	2	1	300	1	2200
NM_177190	Tcp11l1	chr2_104550319-104554320	TSS12186	0.985837	0.846525	0.866651	1	-0.219556	-0.185697	0.0338589	1	0	0	1	1300
NM_144804	Depdc7	chr2_104580958-104584959	TSS12188	7.82079	7.0214	9.34931	1	-0.155535	0.257515	0.41305	1	0	0	1	1275
NM_001123327	Qser1	chr2_104654853-104658854	TSS12189	13.8871	14.6793	9.43852	1	0.0800322	-0.557064	-0.637096	1	0	0	1	1975
NM_001083121	Enah	chr1_183948111-183952112	TSS1219	96.7141	112.647	73.95	4	0.22001	-0.387171	-0.607181	1	0	0	2	2625
NM_178695	Prrg4	chr2_104688007-104692008	TSS12190	7.67057	6.48986	9.26844	1	-0.241112	0.27296	0.514073	1	0	0	1	1700
NM_145380	Eif3m	chr2_104855184-104859185	TSS12191	123.327	124.383	145.596	1	0.0123005	0.23948	0.22718	1	0	0	2	1225
NR_015462	AI314831	chr2_104964667-104968668	TSS12192	0.0369606	0.0893126	0.0443907	1	1.25042	0.257894	-0.992531	2	5	2451	2	2625
NM_009037	Rcn1	chr2_105237476-105241477	TSS12193	24.3339	25.6914	34.0479	1	0.0783148	0.484581	0.406267	1	0	0	2	1925
NR_002867	Pax6os1	chr2_105508487-105512488	TSS12194	0	0	0	1	0	0	0	2	1	4001	1	1600
NM_023876	Elp4	chr2_105742657-105746658	TSS12195	6.05725	5.47462	5.21151	1	-0.145879	-0.216923	-0.0710441	1	0	0	1	1200
NM_026992	Dnajc24	chr2_105841706-105845707	TSS12196	5.80224	6.1275	6.27974	2	0.0786745	0.114075	0.0354008	1	0	0	1	1100
NM_001025102	2700007P21Rik	chr2_106812554-106816555	TSS12198	11.3248	16.7682	20.7094	1	0.566201	0.870742	0.304542	1	0	0	1	1725
NM_001114663	Plcl1	chr1_55460789-55464790	TSS122	0.0278903	0.0859545	0.100976	1	1.58968	1.81957	0.229897	2	1	1225	1	1825
NM_001166728	Vmn1r1	chr1_184086229-184090230	TSS1220	0	0	0	1	0	0	0	1	0	0	1	25
NM_029790	Mettl15	chr2_109116447-109120448	TSS12200	1.80212	1.21559	3.42573	1	-0.567652	0.926337	1.49399	1	0	0	1	525
NR_033473	Gm13939	chr2_109751476-109755477	TSS12201	0.905374	0.630577	0.283763	1	-0.521148	-1.67034	-1.1492	1	0	0	2	1225
NM_026271	Fibin	chr2_110201150-110205151	TSS12203	0.0840813	0	0.207418	1	-6.41077	1.29257	7.70334	1	0	0	1	800
NM_001128103	Ano3	chr2_110788260-110792261	TSS12204	0.920758	0.384046	0.869579	1	-1.25936	-0.0824128	1.17694	1	0	0	1	600
NM_001081556	Ano3	chr2_110788401-110792402	TSS12205	0	0.0481009	0.0936238	1	5.61768	6.56413	0.946454	1	0	0	1	600
NM_007853	Degs1	chr1_184210890-184214891	TSS1221	33.9196	37.6868	36.6906	1	0.151936	0.113288	-0.0386478	1	0	0	2	2410
NM_175127	Fbxo28	chr1_184269737-184273738	TSS1222	11.8717	11.6266	12.9297	1	-0.0300947	0.123152	0.153247	1	0	0	1	1350
NM_026519	Tmem85	chr2_112206184-112210185	TSS12229	25.8681	27.1052	27.2009	1	0.067393	0.0724776	0.00508455	1	0	0	1	1125
NM_009794	Capn2	chr1_184445614-184449615	TSS1223	13.38	13.0259	26.1895	1	-0.0386921	0.968858	1.00755	2	3	1825	1	1250
NM_011824	Grem1	chr2_113596805-113600806	TSS12232	9.68087	5.14955	16.2371	1	-0.910559	0.746025	1.65658	2	2	2475	1	1775
NM_009162	Scg5	chr2_113667248-113671249	TSS12233	0.316144	0.445254	0.303923	1	0.492727	-0.0566931	-0.54942	1	0	0	1	400
NM_181416	Arhgap11a	chr2_113686818-113690819	TSS12234	42.7883	49.2216	40.9478	1	0.202071	-0.0634289	-0.2655	1	0	0	2	2000
NM_010290	Gjd2	chr2_113837355-113841356	TSS12235	0	0	0	1	0	0	0	2	1	1800	1	1375
NM_009702	Aqr	chr2_113999075-114003076	TSS12237	28.5036	30.106	27.2195	1	0.0789042	-0.0665012	-0.145405	1	0	0	2	1200
NM_175466	Zfp770	chr2_114025168-114029169	TSS12238	4.64249	4.63123	4.4505	1	-0.00350264	-0.060918	-0.0574153	1	0	0	1	700
NM_025675	Atpbd4	chr2_114478664-114482665	TSS12239	12.6397	12.9973	10.5892	1	0.0402466	-0.255347	-0.295593	1	0	0	1	900
NM_001033547	4922505E12Rik	chr1_184677311-184681312	TSS1224	0	0	0.0100921	1	0	3.47146	3.47146	2	1	75	1	1950
NM_001159569	Meis2	chr2_115888357-115892358	TSS12241	0.838265	0.32314	0.490368	5	-1.37251	-0.772321	0.600189	2	4	1993	4	2676
NM_001159568	Meis2	chr2_115888794-115892795	TSS12242	0.651993	0.420576	0.499172	4	-0.631276	-0.384645	0.246632	2	4	1556	3	3051
NR_033447	2810405F15Rik	chr2_115899832-115903833	TSS12243	0	0	0	1	0	0	0	2	4	2418	1	725
NM_011246	Rasgrp1	chr2_117166613-117170614	TSS12244	0.823873	0.944751	0.525655	1	0.197288	-0.647314	-0.844602	2	1	325	1	1350
NM_027759	Fsip1	chr2_118080702-118084703	TSS12245	0.270496	0.31107	0.238232	1	0.200939	-0.182521	-0.383459	1	0	0	1	475
NM_201367	Gpr176	chr2_118197155-118201156	TSS12246	0.429835	0.242459	1.47482	1	-0.823457	1.77631	2.59977	2	2	2400	1	1675
NM_009273	Srp14	chr2_118303432-118307433	TSS12247	44.8366	38.6688	45.8388	1	-0.213502	0.0318917	0.245393	1	0	0	1	1425
NM_138313	Bmf	chr2_118373414-118377415	TSS12248	3.98417	3.79856	6.07506	1	-0.0688089	0.608495	0.677304	1	0	0	1	2461
NM_001081971	Gm1337	chr2_118527699-118531700	TSS12249	0	0.0162909	0.030242	1	4.11194	4.96541	0.853474	2	1	4001	1	2375
NM_028516	1700056E22Rik	chr1_185855877-185859878	TSS1225	0.157215	0.346805	0.180518	1	1.13639	0.198226	-0.938166	1	0	0	1	2175
NM_177568	Plcb2	chr2_118552174-118556175	TSS12250	0.0179695	0.0174882	0.0116738	1	-0.0370769	-0.581832	-0.544756	-1	1	125	0	0
NM_001001982	A430105I19Rik	chr2_118586397-118590398	TSS12251	0.35181	0.304151	0.7298	1	-0.209368	1.05059	1.25995	1	0	0	1	1100
NM_199310	Ccdc32	chr2_118853129-118857130	TSS12252	3.41654	3.48096	3.45144	1	0.0269414	0.0146581	-0.0122833	1	0	0	1	700
NM_001033136	Fam82a2	chr2_118980770-118984771	TSS12253	13.4384	13.6434	12.8289	1	0.0218402	-0.0669588	-0.088799	1	0	0	1	1700
NM_139139	Dnajc17	chr2_119032531-119036532	TSS12254	9.14472	8.63421	7.92026	1	-0.0828655	-0.207367	-0.124501	1	0	0	1	1575
NM_028104	Ppp1r14d	chr2_119053601-119057602	TSS12255	0.361148	0.281596	1.09727	1	-0.357838	1.60058	1.95842	1	0	0	1	500
NM_145530	Rhov	chr2_119094962-119098963	TSS12256	1.30017	1.29775	1.09325	1	-0.00268572	-0.249867	-0.247181	1	0	0	1	1700
NR_030683	Gm14207	chr2_119149933-119153934	TSS12257	0.0481973	0	0.0898574	1	-5.62051	0.885025	6.50553	2	3	3451	1	3292
NM_026574	Ino80	chr2_119301365-119305366	TSS12258	12.7205	10.6603	8.27602	1	-0.254885	-0.620085	-0.3652	1	0	0	2	3125
NM_172857	Exd1	chr2_119371363-119375364	TSS12259	0.889312	0.656236	0.481319	1	-0.437899	-0.884323	-0.446424	1	0	0	1	1425
NM_008250	Hlx	chr1_186554372-186558373	TSS1226	0.0534771	0.142164	0.293984	1	1.39395	2.43691	1.04297	2	2	3051	1	1700
NM_001042653	Oip5	chr2_119442241-119446242	TSS12260	19.4878	14.1048	18.2849	1	-0.466357	-0.0919136	0.374443	1	0	0	3	1725
NM_027175	Ndufaf1	chr2_119486534-119490535	TSS12261	11.7163	11.2431	9.39298	1	-0.059472	-0.318832	-0.25936	1	0	0	2	1200
NM_008523	Ltk	chr2_119582261-119586262	TSS12262	0.0973502	0.141301	0.452353	2	0.532947	2.20463	1.67169	2	2	725	1	1825
NM_206942	Ltk	chr2_119584167-119588168	TSS12263	0.0928893	0.105152	0.0520065	2	0.177097	-0.824793	-1.00189	2	2	658	1	1033
NM_001163701	Rpap1	chr2_119611273-119615274	TSS12264	36.2358	29.8567	28.9947	2	-0.279353	-0.321617	-0.0422641	1	0	0	2	1150
NM_133838	Ehd4	chr2_119978311-119982312	TSS12265	12.5995	11.9088	11.7686	1	-0.0813318	-0.0984157	-0.0170839	1	0	0	1	1450
NM_177845	Pla2g4e	chr2_120069071-120073072	TSS12266	0.0484615	0.0468337	0.0385242	1	-0.0482786	-0.32357	-0.275291	1	0	0	2	1104
NM_001024145	Pla2g4f	chr2_120137901-120141902	TSS12268	0.180052	0.125101	0.309703	1	-0.521824	0.779132	1.30096	1	0	0	1	450
NM_178851	Vps39	chr2_120176869-120180870	TSS12269	9.55514	8.5397	11.2918	3	-0.162074	0.240903	0.402977	1	0	0	1	825
NM_001081361	Mosc1	chr1_186633192-186637193	TSS1227	0.0710622	0	0.0573543	1	-6.17117	-0.304404	5.86677	2	2	125	1	850
NM_001110497	Tmem87a	chr2_120227852-120231853	TSS12270	24.3089	24.0155	26.7687	5	-0.0175157	0.139057	0.156573	1	0	0	2	1850
NM_011743	Zfp106	chr2_120387567-120391568	TSS12271	63.8811	62.5649	66.7764	1	-0.0300352	0.0639482	0.0939834	1	0	0	1	725
NM_001159612	Lrrc57	chr2_120433094-120437095	TSS12272	7.61287	4.63434	4.12458	2	-0.715955	-0.884033	-0.168078	1	0	0	1	1650
NM_001159610	Lrrc57	chr2_120433244-120437245	TSS12273	1.96301	3.31854	3.8441	3	0.757187	0.969224	0.212037	1	0	0	1	1650
NM_026891	Cdan1	chr2_120555253-120559254	TSS12274	4.81016	4.66357	4.76891	1	-0.0446407	-0.0124227	0.032218	1	0	0	1	2675
NM_001024857	Ttbk2	chr2_120674154-120678155	TSS12275	3.08987	2.40578	2.51155	2	-0.360908	-0.298861	0.0620469	1	0	0	1	1600
NM_080788	Ttbk2	chr2_120674320-120678321	TSS12276	0	0	0	1	0	0	0	1	0	0	1	1600
NM_009461	Ubr1	chr2_120794451-120798452	TSS12277	7.67092	7.62094	6.97153	1	-0.00942943	-0.137905	-0.128476	1	0	0	1	1200
NM_133684	Mosc2	chr1_186667726-186671727	TSS1228	16.7327	14.2439	24.4725	1	-0.232311	0.548464	0.780775	1	0	0	1	1675
NM_177846	Lcmt2	chr2_120964434-120968435	TSS12281	5.9816	5.93268	4.72041	1	-0.0118455	-0.341555	-0.329709	1	0	0	2	2241
NM_178889	Zscan29	chr2_120994885-120998886	TSS12282	2.29331	2.4393	1.83839	1	0.0889982	-0.318833	-0.407831	1	0	0	3	1750
NM_013735	Trp53bp1	chr2_121095122-121099123	TSS12283	12.9418	12.7446	12.6772	1	-0.0221505	-0.0297998	-0.00764936	1	0	0	1	1225
NM_153075	Catsper2	chr2_121237528-121241529	TSS12286	1.36211	1.01354	1.09685	1	-0.426076	-0.312221	0.113855	1	0	0	1	1900
NM_145973	Ell3	chr2_121266337-121270338	TSS12287	8.01796	7.32971	7.16681	1	-0.129462	-0.161883	-0.0324205	1	0	0	1	1450
NM_001025371	Serinc4	chr2_121280500-121284501	TSS12288	1.84831	1.71276	1.23671	1	-0.109822	-0.579314	-0.469492	1	0	0	1	1300
NM_001081975	Mfap1b	chr2_121297759-121301760	TSS12289	18.4885	19.2287	14.2529	1	0.05663	-0.37535	-0.43198	1	0	0	1	1075
NR_035502	Mir1981	chr1_186644367-186648368	TSS1229	0	0	0.507932	1	0	8.99133	8.99133	1	0	0	1	375
NM_026220	Mfap1a	chr2_121330392-121334393	TSS12290	18.5967	18.8467	14.8559	1	0.0192643	-0.323991	-0.343255	1	0	0	2	1425
NM_172673	Frmd5	chr2_121630793-121634794	TSS12291	2.59219	3.12833	2.70721	1	0.271126	0.0626117	-0.208514	1	0	0	1	2125
NM_008545	Mageb3	chr2_121779828-121783829	TSS12292	0.143394	0.0858828	0.128742	1	-0.732868	-0.154365	0.578503	1	0	0	3	1825
NM_145531	Spg11	chr2_121942122-121946123	TSS12293	11.8369	8.82045	17.8036	1	-0.424325	0.588837	1.01316	1	0	0	1	1425
NM_026251	Patl2	chr2_122009925-122013926	TSS12294	2.8058	2.00433	4.72675	1	-0.485087	0.752227	1.23731	1	0	0	1	450
NM_177610	Duox2	chr2_122121901-122125902	TSS12295	0.0795716	0.0343054	0.0556941	1	-1.19038	-0.507073	0.68331	2	2	2877	3	1299
NM_145395	Duoxa1	chr2_122137466-122141467	TSS12296	0	0.0354267	0	1	5.18692	0	-5.18692	2	1	1325	1	1225
NM_001013829	Shf	chr2_122192654-122196655	TSS12297	4.73419	4.42736	5.86895	1	-0.0966498	0.309926	0.406576	1	0	0	1	3630
NR_027919	Bambi-ps1	chr2_122291533-122295534	TSS12298	3.14967	2.57912	2.3765	1	-0.28822	-0.406213	-0.117993	2	2	225	1	1000
NM_025961	Gatm	chr2_122435013-122439014	TSS12299	1.33611	1.58061	1.38682	1	0.242276	0.0537023	-0.188573	2	2	850	1	825
NR_024325	9130024F11Rik	chr1_57026312-57030313	TSS123	0.624448	0.467738	0.279704	2	-0.416108	-1.15584	-0.73973	2	2	2038	2	3476
NM_178692	C130074G19Rik	chr1_186704915-186708916	TSS1230	1.6197	2.82022	2.54784	1	0.799702	0.653224	-0.146478	1	0	0	1	1125
NM_011774	Slc30a4	chr2_122526399-122530400	TSS12300	4.62081	3.27299	4.26791	1	-0.497408	-0.11459	0.382818	2	2	700	1	975
NM_001162418	Myef2	chr2_124947396-124951397	TSS12301	104.627	110.579	63.0037	8	0.0798255	-0.73174	-0.811566	1	0	0	1	2225
NM_007993	Fbn1	chr2_125330174-125334175	TSS12302	1.5431	1.28931	2.08637	1	-0.259048	0.43492	0.693969	2	2	2300	1	2050
NM_001081091	Cep152	chr2_125448849-125452850	TSS12303	4.18891	4.10613	3.17818	1	-0.0287886	-0.398265	-0.369476	1	0	0	1	900
NM_199022	Shc4	chr2_125547884-125551885	TSS12304	0.263382	0.15202	0.111378	1	-0.788904	-1.23426	-0.445361	2	2	950	2	1725
NM_177608	Secisbp2l	chr2_125606606-125610607	TSS12305	5.77985	6.1279	6.03794	1	0.0843465	0.0630137	-0.0213328	1	0	0	1	775
NM_009939	Cops2	chr2_125682754-125686755	TSS12306	51.071	49.3095	51.3835	1	-0.0506377	0.00880068	0.0594384	1	0	0	1	1150
NM_008230	Hdc	chr2_126442401-126446402	TSS12309	0.170287	0.164125	0.118882	1	-0.0528571	-0.514801	-0.461944	0	0	0	0	0
NM_145515	Mark1	chr1_186821428-186825429	TSS1231	2.2176	2.39713	3.39837	1	0.11226	0.615618	0.503358	2	1	150	1	1550
NM_010249	Gabpb1	chr2_126499222-126503223	TSS12310	21.072	21.3115	21.8858	2	0.0163075	0.0546667	0.0383592	1	0	0	2	2603
NM_021450	Trpm7	chr2_126699997-126703998	TSS12312	24.9699	22.0613	30.0066	2	-0.178667	0.265081	0.443747	1	0	0	1	2100
NM_023220	2010106G01Rik	chr2_126756971-126760972	TSS12313	5.38107	4.32635	5.35099	1	-0.314677	-0.00808573	0.306592	1	0	0	1	1150
NM_144818	Ncaph	chr2_126957690-126961691	TSS12314	37.6212	33.8983	33.438	1	-0.150329	-0.170053	-0.0197238	1	0	0	1	1450
NM_001163528	Itpripl1	chr2_126966326-126970327	TSS12315	0	0	0	1	0	0	0	1	0	0	1	1475
NM_001163527	Itpripl1	chr2_126967193-126971194	TSS12316	2.8954	3.75883	3.28509	1	0.376407	0.182111	-0.194295	1	0	0	1	1475
NM_198630	1810024B03Rik	chr2_127032016-127036017	TSS12317	0.110295	0.152584	0.136958	1	0.464639	0.30984	-0.154799	1	0	0	1	1975
NM_025296	Ciao1	chr2_127071552-127075553	TSS12318	11.3964	10.2655	9.36423	1	-0.15076	-0.283318	-0.132558	1	0	0	1	2075
NM_029629	Fahd2a	chr2_127268301-127272302	TSS12319	2.64917	2.24208	2.27952	1	-0.240604	-0.216722	0.0238817	1	0	0	1	1275
NM_198653	Iars2	chr1_187151280-187155281	TSS1232	26.674	25.8891	29.4942	1	-0.0430877	0.144992	0.18808	1	0	0	1	1550
NM_001111331	Kcnip3	chr2_127306235-127310236	TSS12320	0.799911	1.68672	1.87809	1	1.07536	1.23032	0.154959	2	1	1025	2	2436
NM_019789	Kcnip3	chr2_127345106-127349107	TSS12321	0	0.147615	0.0265684	1	7.21544	4.78494	-2.43049	1	0	0	1	1500
NM_138750	Prom2	chr2_127365153-127369154	TSS12322	0.174207	0.404281	0.229538	2	1.20986	0.395945	-0.813918	1	0	0	1	1125
NM_028141	Zfp661	chr2_127408413-127412414	TSS12323	2.27522	2.16177	3.13432	2	-0.0737566	0.461976	0.535732	1	0	0	2	725
NM_010762	Mal	chr2_127480431-127484432	TSS12324	0.0857637	0.105922	0.0521944	2	0.301393	-0.705817	-1.00721	2	1	1550	2	950
NM_145532	Mall	chr2_127553633-127557634	TSS12325	0.157103	0.124274	0.100944	1	-0.335778	-0.633088	-0.29731	1	0	0	1	1075
NM_016902	Nphp1	chr2_127612590-127616591	TSS12326	6.29852	5.88653	4.63694	1	-0.0975794	-0.441758	-0.344178	1	0	0	1	975
NR_015476	1500011K16Rik	chr2_127616224-127620225	TSS12327	14.5029	11.6618	16.596	1	-0.314527	0.194482	0.509008	1	0	0	2	950
NM_001113179	Bub1	chr2_127655595-127659596	TSS12328	57.6088	53.3459	54.0088	2	-0.11091	-0.093093	0.0178168	1	0	0	1	825
NR_028590	Gm14005	chr2_128253087-128257088	TSS12329	2.01228	1.35345	2.057	3	-0.571846	0.0316949	0.60354	1	0	0	1	1525
NM_146106	Lyplal1	chr1_187939189-187943190	TSS1233	5.66034	5.07146	7.57978	1	-0.158458	0.421203	0.579661	1	0	0	1	825
NM_008569	Anapc1	chr2_128511131-128515132	TSS12330	24.917	23.6843	26.529	1	-0.0731963	0.0904364	0.163633	1	0	0	2	1075
NM_020594	Zc3h8	chr2_128767756-128771757	TSS12331	10.9998	12.3977	12.568	1	0.17258	0.192261	0.019681	1	0	0	1	1150
NM_181589	Ckap2l	chr2_129120948-129124949	TSS12332	19.1096	18.9007	23.5188	1	-0.0158571	0.299503	0.31536	1	0	0	1	1850
NM_018863	Pdyn	chr2_129513604-129517605	TSS12336	0.465982	0.646675	1.70343	1	0.471903	1.86785	1.39595	1	0	0	1	771
NR_029452	4932416H05Rik	chr2_129625195-129629196	TSS12337	0.686984	0.642066	0.58642	1	-0.0974082	-0.227983	-0.130574	1	0	0	1	2975
NM_009225	Snrpb	chr2_130003100-130007101	TSS12338	159.232	182.238	133.586	1	0.194692	-0.25336	-0.448052	1	0	0	2	1800
NM_130884	Idh3b	chr2_130108187-130112188	TSS12339	50.2202	53.6547	59.7513	1	0.0954349	0.250698	0.155263	1	0	0	1	1700
NM_009367	Tgfb2	chr1_188527871-188531872	TSS1234	1.07722	0.50468	1.46651	1	-1.09235	0.444719	1.53707	2	3	975	2	1854
NM_019696	Cpxm1	chr2_130221365-130225366	TSS12340	3.37612	2.88276	2.95443	1	-0.227842	-0.192425	0.0354169	2	1	150	1	1325
NM_178762	Fam113a	chr2_130248024-130252025	TSS12341	2.73011	1.02493	3.44878	1	-1.41256	0.337017	1.74957	1	0	0	2	1900
NM_001114541	Fam113a	chr2_130248377-130252378	TSS12342	0.539366	2.30141	0.645681	1	2.09114	0.259117	-1.83202	1	0	0	1	1825
NM_009732	Avp	chr2_130406277-130410278	TSS12343	0.0468332	0	0.104105	1	-5.57994	1.13575	6.71569	2	1	2173	1	973
NM_198176	Fastkd5	chr2_130453763-130457764	TSS12344	9.03181	9.17323	9.18773	3	0.0224122	0.0246912	0.00227901	1	0	0	1	1300
NM_197945	Prosapip1	chr2_130466539-130470540	TSS12345	2.04037	2.65588	1.91239	1	0.380195	-0.0934067	-0.473602	1	0	0	1	1100
NM_029832	Ddrgk1	chr2_130488381-130492382	TSS12346	15.754	18.3744	21.2071	1	0.221966	0.428806	0.20684	1	0	0	1	1700
NM_001081162	Slc4a11	chr2_130521255-130525256	TSS12347	3.89417	2.37325	5.80082	1	-0.714214	0.574819	1.28903	1	0	0	1	2500
NM_029432	4930402H24Rik	chr2_130663846-130667847	TSS12348	4.67341	3.54898	3.77584	1	-0.396973	-0.307605	0.0893688	1	0	0	1	1575
NR_024097	Gm14057	chr2_130627837-130631838	TSS12349	0.425089	0.575592	0.409886	1	0.436396	-0.0524166	-0.488813	1	0	0	1	450
NM_026041	Rrp15	chr1_188571237-188575238	TSS1235	54.6728	55.977	41.479	1	0.0340103	-0.398434	-0.432444	1	0	0	1	2475
NR_015523	A730017L22Rik	chr2_130730132-130734133	TSS12350	8.53696	7.45444	5.39352	1	-0.195598	-0.662397	-0.466799	1	0	0	1	1700
NM_020014	Gfra4	chr2_130866418-130870419	TSS12351	5.23031e-06	7.43963e-06	3.53428e-06	1	0.00316731	-0.00243618	-0.00560349	2	1	1150	2	1444
NM_001136063	Gfra4	chr2_130866824-130870825	TSS12352	0.363185	0.4918	0.37765	1	0.436331	0.0561934	-0.380137	2	1	1150	2	1276
NM_001163529	Adam33	chr2_130887550-130891551	TSS12353	0.0757442	0.101411	0.176003	2	0.416242	1.20565	0.789405	2	1	825	1	475
NM_026091	1700037H04Rik	chr2_130983756-130987757	TSS12355	30.0418	37.5037	38.8723	1	0.320052	0.37176	0.0517082	1	0	0	1	2375
NM_027641	Spef1	chr2_130998546-131002547	TSS12356	1.18368	0.827276	0.484769	1	-0.516314	-1.28616	-0.769841	1	0	0	1	325
NM_007682	Cenpb	chr2_131003748-131007749	TSS12357	13.2012	16.6857	11.9754	1	0.33792	-0.140584	-0.478504	1	0	0	1	2827
NM_178607	Rnf24	chr2_131176628-131180629	TSS12358	2.49602	2.24202	2.59002	1	-0.154765	0.0533128	0.208078	1	0	0	2	1450
NM_013460	Adra1d	chr2_131386021-131390022	TSS12359	0.154762	0.200726	0.360682	1	0.373054	1.21538	0.842325	2	3	3351	1	2350
NM_029067	Spata17	chr1_189037325-189041326	TSS1236	0.194978	0	0.0300312	2	-7.61455	-2.6589	4.95565	1	0	0	1	1100
NR_029381	5330413P13Rik	chr2_131671392-131675393	TSS12360	0.0040489	0.00195754	0.00356731	1	-0.771571	-0.144624	0.626947	1	0	0	2	975
NM_175445	Rassf2	chr2_131853724-131857725	TSS12362	1.99549	2.01566	2.00806	1	0.014502	0.0090548	-0.00544722	2	1	250	2	2425
NM_018824	Slc23a2	chr2_131968844-131972845	TSS12363	9.04981	9.17229	10.4038	1	0.0193923	0.20113	0.181738	1	0	0	1	1825
NM_001141971	5730494N06Rik	chr2_132071524-132075525	TSS12364	19.3283	17.6678	17.8812	2	-0.129585	-0.112265	0.0173202	1	0	0	1	975
NM_011045	Pcna	chr2_132076916-132080917	TSS12365	345.483	373.926	333.195	1	0.114138	-0.0522478	-0.166386	1	0	0	2	2250
NM_144944	Prokr2	chr2_132209183-132213184	TSS12366	0.13593	0.145021	0.0849318	1	0.0927373	-0.672175	-0.764912	2	1	950	1	1200
NM_001042672	Gpcpd1	chr2_132401984-132405985	TSS12367	5.4789	6.70069	8.79707	5	0.290375	0.683038	0.392663	1	0	0	1	1175
NM_175113	Trmt6	chr2_132639790-132643791	TSS12368	21.697	22.7878	18.8457	1	0.0707629	-0.20325	-0.274013	1	0	0	2	2050
NM_177303	Lrrn4	chr2_132704598-132708599	TSS12369	1.50218	1.56364	1.18325	1	0.057813	-0.344044	-0.401857	1	0	0	1	2802
NM_172650	Kctd3	chr1_190829719-190833720	TSS1237	30.0319	28.9851	24.6425	1	-0.0511826	-0.285337	-0.234154	1	0	0	2	1631
NM_198029	Fermt1	chr2_132769772-132773773	TSS12370	0.341903	0.568936	0.302625	1	0.732999	-0.17551	-0.908509	1	0	0	1	1200
NM_029148	Tmx4	chr2_134467857-134471858	TSS12372	5.34853	4.5272	4.22799	1	-0.240474	-0.339099	-0.0986245	1	0	0	1	725
NM_172858	Pak7	chr2_136211703-136215704	TSS12374	0.0261108	0.0986687	0.118508	1	1.87827	2.14017	0.261895	1	0	0	1	1200
NM_001141946	Mkks	chr2_136715142-136719143	TSS12375	11.9102	11.4043	9.58922	2	-0.0626136	-0.31268	-0.250067	1	0	0	2	1200
NM_013822	Jag1	chr2_136940256-136944257	TSS12376	5.33331	4.55387	3.54827	1	-0.227892	-0.587779	-0.359888	1	0	0	1	3344
NM_001159640	Tasp1	chr2_139890521-139894522	TSS12377	4.52869	5.5133	3.79808	5	0.283765	-0.253762	-0.537527	1	0	0	3	1525
NM_001081090	Esf1	chr2_139994294-139998295	TSS12378	33.8518	36.5049	27.5148	1	0.108854	-0.299015	-0.407869	1	0	0	1	1950
NM_001159850	Kcnk2	chr1_191165232-191169233	TSS1238	0.231796	0.13301	3.16772e-06	1	-0.796726	-7.85836	-7.06163	2	2	550	1	950
NM_178382	Flrt3	chr2_140495212-140499213	TSS12380	3.15039	4.07662	4.7943	2	0.371739	0.605633	0.233894	1	0	0	1	1025
NM_001081133	Kif16b	chr2_142725200-142729201	TSS12381	5.32874	4.99726	5.16715	1	-0.0926392	-0.0444172	0.048222	1	0	0	2	1976
NM_009751	Bfsp1	chr2_143686909-143690910	TSS12382	0.147641	0.142199	0.111838	1	-0.0538107	-0.397579	-0.343768	1	0	0	1	925
NM_024281	Rrbp1	chr2_143834999-143839000	TSS12383	48.0467	91.0064	76.1464	2	0.921517	0.664328	-0.257189	1	0	0	2	1950
NM_024225	Snx5	chr2_144094308-144098309	TSS12384	151.787	155.183	125.613	1	0.0319221	-0.27306	-0.304983	1	0	0	3	2550
NR_030762	Snord17	chr2_144089938-144093939	TSS12385	3.69899	3.53227	4.01453	1	-0.0665174	0.118069	0.184586	1	0	0	3	1150
NM_152947	Ovol2	chr2_144155098-144159099	TSS12386	0.582387	0	0	1	-9.18831	-9.18831	0	2	2	1225	2	3199
NM_026924	Ovol2	chr2_144155816-144159817	TSS12387	0.920007	1.27321	1.58927	1	0.468319	0.787988	0.319669	2	2	1225	2	3084
NM_172859	6330439K17Rik	chr2_144351134-144355135	TSS12388	0.205329	0.24735	0.122495	1	0.267428	-0.740494	-1.00792	1	0	0	1	1650
NM_015754	Rbbp9	chr2_144374595-144378596	TSS12389	7.13847	6.60208	8.02023	1	-0.112678	0.168007	0.280684	1	0	0	2	650
NM_010607	Kcnk2	chr1_191165583-191169584	TSS1239	0	0	0	1	0	0	0	2	2	550	1	950
NM_025820	Crnkl1	chr2_145758436-145762437	TSS12391	19.4825	17.4932	14.581	1	-0.155376	-0.418064	-0.262688	1	0	0	2	1175
NM_001033348	Ralgapa2	chr2_146335740-146339741	TSS12392	4.65132	4.65116	3.80731	1	-4.96172e-05	-0.288799	-0.28875	1	0	0	1	1625
NM_023504	Nkx2-4	chr2_146909081-146913082	TSS12393	0.0689034	0.063523	0.0859757	1	-0.115549	0.31525	0.430799	2	5	2119	1	2000
NM_001077632	Nkx2-2	chr2_147010138-147014139	TSS12394	0.0255512	0.113384	0.0478516	2	2.10704	0.879629	-1.22741	2	3	3451	5	1837
NM_010446	Foxa2	chr2_147870705-147874706	TSS12395	0.419806	0.883878	1.41071	1	1.07232	1.74622	0.673893	2	3	3426	3	1856
NM_009378	Thbd	chr2_148231924-148235925	TSS12396	2.66316	2.1056	5.28786	1	-0.338764	0.989276	1.32804	2	1	1801	2	2300
NM_019632	Napb	chr2_148556156-148560157	TSS12398	0.757158	0.747797	1.04211	1	-0.0179239	0.460321	0.478245	1	0	0	1	975
NM_028546	1700066M21Rik	chr1_57432463-57436464	TSS124	2.76729	2.07625	4.75784	1	-0.41432	0.781615	1.19594	1	0	0	1	1025
NR_027627	Kcnk2	chr1_191166071-191170072	TSS1240	0	3.99715e-06	0.1746	1	0.00575517	7.45615	7.45039	2	2	550	1	950
NM_009976	Cst3	chr2_148699204-148703205	TSS12401	62.723	49.5203	71.5124	1	-0.340968	0.189196	0.530164	1	0	0	1	2150
NM_181266	Zfp120	chr2_149960414-149964415	TSS12402	5.05931	3.62583	4.87687	2	-0.480518	-0.0529768	0.427541	1	0	0	1	800
NM_027017	3300002I08Rik	chr2_150186501-150190502	TSS12403	1.52359	1.05566	1.50727	1	-0.52891	-0.0155266	0.513383	1	0	0	1	825
NM_001177550	Zfp442	chr2_150275230-150279231	TSS12404	2.94241	1.90148	2.17265	1	-0.629607	-0.437369	0.192238	1	0	0	1	675
NM_001034900	Zfp345	chr2_150308799-150312800	TSS12405	5.51013	4.24335	3.62743	1	-0.376805	-0.603003	-0.226198	1	0	0	2	675
NM_027977	2310001A20Rik	chr2_150432259-150436260	TSS12406	4.91272	4.44658	6.12348	1	-0.143795	0.317772	0.461567	1	0	0	1	1350
NM_080575	Acss1	chr2_150491976-150495977	TSS12407	3.8329	2.87451	5.3708	1	-0.414995	0.486593	0.901588	1	0	0	1	1375
NM_054068	Vsx1	chr2_150512873-150516874	TSS12408	0.0525016	0.0501647	0.127079	1	-0.0644332	1.25938	1.32381	2	1	2850	1	1100
NM_024465	Abhd12	chr2_150728467-150732468	TSS12409	12.1534	9.56419	13.6642	1	-0.345613	0.169028	0.514641	1	0	0	1	1550
NM_001081363	Cenpf	chr1_191509965-191513966	TSS1241	38.9853	33.4017	31.7581	1	-0.223003	-0.295797	-0.0727947	1	0	0	3	1475
NM_207204	Ninl	chr2_150833134-150837135	TSS12410	11.4968	8.44383	6.16112	1	-0.445218	-0.899859	-0.454642	2	1	125	1	1300
NM_026086	Nanp	chr2_150863115-150867116	TSS12411	11.1356	9.80689	8.88945	1	-0.183294	-0.32498	-0.141686	1	0	0	1	2275
NM_198214	Snph	chr2_151456269-151460270	TSS12414	0.020612	0.115482	0.0457759	1	2.4302	1.11393	-1.31627	2	3	1800	1	925
NM_001114677	Rad21l	chr2_151492269-151496270	TSS12415	0.107266	0	0.0920093	1	-6.75844	-0.219133	6.5393	1	0	0	1	620
NM_212446	Psmf1	chr2_151565029-151569030	TSS12416	9.02059	8.59001	9.41363	1	-0.070554	0.0615227	0.132077	1	0	0	1	1375
NM_028666	Fam110a	chr2_151797710-151801711	TSS12418	0.198158	0.233759	0.113385	1	0.237267	-0.800016	-1.03728	1	0	0	1	1375
NM_146127	Fam110a	chr2_151803955-151807956	TSS12419	3.53845	2.6437	3.13587	1	-0.420421	-0.174199	0.246222	1	0	0	1	1300
NM_026796	Smyd2	chr1_191744167-191748168	TSS1242	14.0759	17.6484	16.9486	1	0.326289	0.267922	-0.0583679	1	0	0	2	2543
NM_001083921	Rbck1	chr2_152156161-152160162	TSS12420	19.7202	17.0485	20.1124	1	-0.210018	0.0284096	0.238428	1	0	0	1	2450
NM_019705	Rbck1	chr2_152156375-152160376	TSS12421	3.69119	7.35097	3.79426	1	0.993654	0.0397219	-0.953932	1	0	0	1	2400
NM_175093	Trib3	chr2_152167796-152171797	TSS12422	18.014	20.5285	38.9634	1	0.1885	1.11296	0.924458	1	0	0	2	2950
NM_001009948	Nrsn2	chr2_152200302-152204303	TSS12423	0.512338	0.152506	0.219421	1	-1.74161	-1.21965	0.521967	1	0	0	2	1525
NM_011438	Sox12	chr2_152221782-152225783	TSS12424	14.5509	16.5469	14.2026	1	0.185441	-0.0349509	-0.220392	1	0	0	1	3518
NM_175126	Zcchc3	chr2_152238780-152242781	TSS12425	13.4973	17.6198	10.9377	1	0.384502	-0.303336	-0.687838	1	0	0	1	2720
NM_008937	Prox1	chr1_191992559-191996560	TSS1243	0.42875	0.152099	0.233763	1	-1.48903	-0.872293	0.61674	2	4	2751	1	2491
NM_009743	Bcl2l1	chr2_152655418-152659419	TSS12433	18.4288	17.4139	24.8107	1	-0.0817182	0.42898	0.510698	1	0	0	1	2082
NM_010226	Foxs1	chr2_152756944-152760945	TSS12434	0.520532	0.69907	0.896506	1	0.424743	0.783166	0.358422	1	0	0	1	675
NM_001159376	Dusp15	chr2_152775318-152779319	TSS12435	0.0298092	0.174739	0.0147332	1	2.512	-0.969549	-3.48155	2	1	1125	1	1175
NM_145744	Dusp15	chr2_152775141-152779142	TSS12436	0	0.0271515	0.216127	1	4.81514	7.7624	2.94726	2	1	1125	1	1175
NM_178939	Pdrg1	chr2_152839119-152843120	TSS12437	11.6165	11.9664	19.9827	1	0.0428101	0.782524	0.739714	1	0	0	1	1200
NM_198617	Tspyl3	chr2_153049177-153053178	TSS12438	0.704947	1.32497	0.874836	1	0.909416	0.311101	-0.598315	1	0	0	1	900
NM_018807	Plagl2	chr2_153065094-153069095	TSS12439	3.31631	4.471	2.24569	1	0.430906	-0.562213	-0.993119	1	0	0	1	2650
NM_178775	Rps6kc1	chr1_192733649-192737650	TSS1244	4.46118	4.71402	3.24748	1	0.0795152	-0.457984	-0.537499	1	0	0	1	1325
NM_001001986	8430427H17Rik	chr2_153268215-153272216	TSS12440	0.978178	1.06912	1.9138	1	0.12813	0.967551	0.839421	2	2	1750	1	2800
NM_001134300	8430427H17Rik	chr2_153353707-153357708	TSS12441	0.93382	0.570012	0.658341	1	-0.711168	-0.503664	0.207504	2	3	1950	1	2818
NM_001195390	Commd7	chr2_153456517-153460518	TSS12442	5.53091	5.21232	7.88852	2	-0.0855761	0.51216	0.597736	1	0	0	1	1225
NM_025876	Cdk5rap1	chr2_154196455-154200456	TSS12444	7.82225	7.12138	8.19263	1	-0.135409	0.0667347	0.202143	1	0	0	1	1375
NM_009228	Snta1	chr2_154231820-154235821	TSS12445	7.44964	9.55955	8.18939	1	0.359729	0.136568	-0.223161	1	0	0	1	1450
NM_021546	Necab3	chr2_154382589-154386590	TSS12446	3.17535	1.96199	1.34083	1	-0.694317	-1.24317	-0.548851	1	0	0	1	1150
NM_007891	E2f1	chr2_154393588-154397589	TSS12447	18.666	21.7203	18.7288	1	0.21862	0.00484541	-0.213775	1	0	0	2	3125
NM_021534	Pxmp4	chr2_154427409-154431410	TSS12448	8.17958	7.88535	9.04521	1	-0.0528454	0.14511	0.197956	1	0	0	1	675
NM_026030	Eif2s2	chr2_154716642-154720643	TSS12449	370.739	345.19	314.494	1	-0.103013	-0.237371	-0.134358	1	0	0	2	1583
NM_144879	Vash2	chr1_192800877-192804878	TSS1245	0.809664	0.687236	0.473552	1	-0.236201	-0.772538	-0.536337	2	1	1050	1	1625
NM_016661	Ahcy	chr2_154898233-154902234	TSS12450	121.17	155.296	142.334	1	0.357986	0.232246	-0.125739	1	0	0	2	2100
NM_001004721	Pigu	chr2_155181160-155185161	TSS12451	12.3	11.3269	12.1354	1	-0.118895	-0.0194351	0.0994601	1	0	0	1	1275
NM_144786	Ggt7	chr2_155338582-155342583	TSS12453	0.401556	0.70765	0.397633	1	0.815884	-0.0141283	-0.830012	1	0	0	1	600
NM_008180	Gss	chr2_155416442-155420443	TSS12454	12.9826	10.7553	15.4788	1	-0.271509	0.253696	0.525205	1	0	0	1	1425
NM_001163452	Trpc4ap	chr2_155516120-155520121	TSS12455	26.2575	25.2259	27.3126	2	-0.0578272	0.0568296	0.114657	1	0	0	1	950
NM_145537	Edem2	chr2_155553211-155557212	TSS12456	12.3582	10.3927	12.7122	1	-0.249876	0.0407419	0.290618	1	0	0	1	1000
NR_015528	BC029722	chr2_155642939-155646940	TSS12457	2.65753	3.38841	2.76473	1	0.350405	0.0570316	-0.293374	1	0	0	1	875
NM_010579	Eif6	chr2_155650661-155654662	TSS12458	50.8111	60.026	54.9047	1	0.240439	0.111784	-0.128656	1	0	0	1	1900
NM_027788	Fam83c	chr2_155658590-155662591	TSS12459	0.0623974	0.126414	0.078279	1	1.00703	0.322515	-0.684513	1	0	0	1	625
NR_027352	Vash2	chr1_192801175-192805176	TSS1246	0.645113	2.2037	0.965114	1	1.77072	0.580407	-1.19032	2	1	1050	1	1625
NM_018888	Uqcc	chr2_155754046-155758047	TSS12460	10.96	10.2351	12.3701	2	-0.0987189	0.174599	0.273318	1	0	0	1	1950
NM_008109	Gdf5	chr2_155769100-155773101	TSS12461	0.109561	0.124712	0.0451817	1	0.18528	-1.25945	-1.44473	1	0	0	2	1050
NM_001145352	6430550D23Rik	chr2_155831713-155835714	TSS12463	0	0	0	1	0	0	0	1	0	0	1	1700
NM_170590	Cpne1	chr2_155935701-155939702	TSS12465	46.687	60.6198	43.756	4	0.376761	-0.0935373	-0.470298	1	0	0	2	1449
NM_010911	Nfs1	chr2_155967922-155971923	TSS12466	15.0177	15.8157	16.0871	1	0.0746887	0.099234	0.0245453	1	0	0	1	1500
NM_133242	Rbm39	chr2_156003976-156007977	TSS12467	156.791	153.337	145.814	1	-0.0321367	-0.104713	-0.0725761	1	0	0	1	1750
NM_020255	Scand1	chr2_156136440-156140441	TSS12468	9.68082	8.22938	13.7307	1	-0.234319	0.50416	0.738479	1	0	0	1	1400
NR_024329	2900097C17Rik	chr2_156216715-156220716	TSS12469	49.0089	58.0972	54.7449	1	0.24542	0.159678	-0.0857425	1	0	0	1	200
NM_001081259	Mfsd7b	chr1_192848069-192852070	TSS1247	3.75142	3.48238	2.54491	1	-0.107333	-0.55964	-0.452306	1	0	0	2	2300
NR_015591	5430405H02Rik	chr2_156686681-156690682	TSS12470	1.22916	1.37038	1.37349	2	0.156782	0.160054	0.00327117	1	0	0	1	2650
NM_180956	Ndrg3	chr2_156815847-156819848	TSS12472	8.01364	9.82276	8.02294	2	0.293638	0.0016731	-0.291964	1	0	0	1	1325
NM_025853	Dsn1	chr2_156830811-156834812	TSS12473	12.8794	11.0947	13.5593	1	-0.215177	0.0742117	0.289388	1	0	0	1	1550
NM_001164663	9830001H06Rik	chr2_156903001-156907002	TSS12474	3.43549	3.05639	2.82521	1	-0.168635	-0.282067	-0.113432	2	1	1049	1	2450
NM_018851	Samhd1	chr2_156958958-156962959	TSS12475	13.3434	15.0479	12.3473	2	0.173426	-0.111918	-0.285343	1	0	0	2	1575
NM_001139516	Rbl1	chr2_157028270-157032271	TSS12476	8.0138	7.31335	6.37031	4	-0.131937	-0.331076	-0.199139	1	0	0	1	1625
NM_001039557	4922505G16Rik	chr2_157103285-157107286	TSS12477	0.0680508	0.0782358	0.222216	1	0.198494	1.69271	1.49422	1	0	0	2	2050
NM_016916	Blcap	chr2_157390097-157394098	TSS12479	9.36787	8.58241	11.1442	1	-0.126324	0.250476	0.3768	1	0	0	1	2650
NM_001163421	Tatdn3	chr1_192884811-192888812	TSS1248	2.04507	2.06013	1.7161	3	0.0105782	-0.252885	-0.263463	1	0	0	1	1675
NM_009373	Tgm2	chr2_157970128-157974129	TSS12481	9.59754	8.84593	20.5792	1	-0.117638	1.10037	1.21801	1	0	0	1	475
NM_001131021	D630003M21Rik	chr2_158052958-158056959	TSS12482	0.0905663	0.0598931	0.0325468	2	-0.588538	-1.44864	-0.860104	1	0	0	2	1150
NR_015463	9430008C03Rik	chr2_158185245-158189246	TSS12483	20.7355	22.5664	19.7805	2	0.122071	-0.0680156	-0.190086	1	0	0	1	2080
NM_010658	Mafb	chr2_160190801-160194802	TSS12485	0.639414	0.616799	0.593584	1	-0.0518673	-0.107124	-0.0552569	2	3	3426	2	3602
NM_177263	Zhx3	chr2_160696726-160700727	TSS12486	0.368701	0.402445	0.295145	1	0.126013	-0.320055	-0.446068	1	0	0	1	1475
NM_182840	Emilin3	chr2_160736064-160740065	TSS12487	0.546407	0.617777	0.46377	1	0.176806	-0.236097	-0.412903	2	3	3186	1	1225
NM_173368	Chd6	chr2_160932792-160936793	TSS12488	8.31611	7.98889	6.77567	1	-0.0579067	-0.295506	-0.237599	1	0	0	1	1725
NM_021464	Ptprt	chr2_162484883-162488884	TSS12489	0.138871	0.0380614	0.0687166	1	-1.84028	-1.00452	0.835759	2	2	2300	2	1600
NM_026630	Gtsf1l	chr2_162913337-162917338	TSS12490	12.6962	6.89047	7.54632	1	-0.881627	-0.750474	0.131153	1	0	0	1	2288
NM_025699	3230401D17Rik	chr2_163243206-163247207	TSS12492	38.907	41.3444	34.2816	1	0.08766	-0.18259	-0.27025	1	0	0	2	2600
NM_173397	Fitm2	chr2_163296365-163300366	TSS12493	2.96895	3.9278	3.16314	1	0.40365	0.0913748	-0.312275	1	0	0	1	1425
NM_012032	Serinc3	chr2_163468879-163472880	TSS12495	43.9469	37.5152	51.9323	1	-0.228281	0.240866	0.469146	1	0	0	1	1175
NM_007398	Ada	chr2_163573913-163577914	TSS12496	3.93721	4.55258	2.73984	1	0.209461	-0.522922	-0.732383	1	0	0	1	1250
NM_183023	Rims4	chr2_163742419-163746420	TSS12497	3.49441	3.2521	2.5903	1	-0.103647	-0.431786	-0.328139	2	3	1250	1	1550
NM_025996	Tomm34	chr2_163894838-163898839	TSS12498	22.2698	23.5922	15.9793	1	0.0832177	-0.478859	-0.562077	1	0	0	1	1400
NM_008435	Kcns1	chr2_163994849-163998850	TSS12499	0.119028	0.341964	0.258549	1	1.51469	1.11264	-0.40205	2	3	2001	1	425
NM_001081181	9430016H08Rik	chr1_57461391-57465392	TSS125	10.0551	7.52748	8.83001	1	-0.41764	-0.187421	0.23022	1	0	0	1	1825
NM_007498	Atf3	chr1_193005212-193009213	TSS1250	25.0931	18.1009	17.9537	1	-0.471207	-0.482987	-0.0117796	2	3	3276	1	3363
NM_013592	Matn4	chr2_164228318-164232319	TSS12508	0.466169	0.585975	0.812149	1	0.329355	0.799575	0.470221	2	2	2600	1	800
NM_011521	Sdc4	chr2_164266688-164270689	TSS12509	65.8918	54.658	67.1619	1	-0.269662	0.0275437	0.297205	1	0	0	2	2162
NM_025424	Nenf	chr1_193139997-193143998	TSS1251	10.0188	9.20013	14.1051	1	-0.122971	0.493465	0.616436	1	0	0	1	925
NM_001160414	Wfdc9	chr2_164478466-164482467	TSS12516	0	0	0	1	0	0	0	1	0	0	2	342
NM_144880	Ppp2r5a	chr1_193218920-193222921	TSS1252	23.6451	23.7487	22.7307	1	0.00630703	-0.0568967	-0.0632037	1	0	0	1	2575
NM_133240	Acot8	chr2_164628381-164632382	TSS12520	9.40346	6.67201	8.53083	1	-0.495007	-0.14049	0.354518	1	0	0	1	3000
NM_029370	1700020C07Rik	chr2_164652034-164656035	TSS12521	0.162425	0.108087	0.102491	1	-0.58315	-0.659123	-0.0759739	1	0	0	4	1200
NM_001082974	Neurl2	chr2_164657096-164661097	TSS12522	1.40851	1.05793	1.55269	1	-0.412586	0.140505	0.553091	1	0	0	2	2675
NM_011125	Pltp	chr2_164681208-164685209	TSS12523	37.4086	34.8114	52.1587	1	-0.103807	0.479527	0.583334	1	0	0	3	2425
NM_199027	Zfp335	chr2_164735250-164739251	TSS12524	3.85296	4.05169	3.37973	1	0.0725382	-0.189007	-0.261545	1	0	0	1	2600
NM_144892	Ncoa5	chr2_164858279-164862280	TSS12525	8.9518	11.4941	6.18939	1	0.360608	-0.532309	-0.892917	1	0	0	1	1500
NM_174988	Cdh22	chr2_165058237-165062238	TSS12527	0.139881	0.25603	0.235924	1	0.86746	0.749947	-0.117512	2	2	3776	1	1900
NM_144893	Slc35c2	chr2_165111338-165115339	TSS12528	12.2088	10.5118	11.6942	1	-0.215893	-0.062123	0.15377	1	0	0	1	1800
NM_207706	Elmo2	chr2_165149979-165153980	TSS12529	0.000342435	0.000649393	0	3	0.297083	-0.424852	-0.721935	1	0	0	1	1650
NM_029766	Dtl	chr1_193397413-193401414	TSS1253	41.6891	43.013	39.1591	1	0.0451015	-0.0903204	-0.135422	1	0	0	1	2850
NM_080287	Elmo2	chr2_165149979-165153980	TSS12530	9.05785	7.2387	8.83621	2	-0.323398	-0.0357369	0.287661	1	0	0	1	1650
NM_001005425	Zfp663	chr2_165185619-165189620	TSS12531	0.0668206	0	0	1	-6.08365	-6.08365	0	1	0	0	2	220
NM_178411	Zfp334	chr2_165211759-165215760	TSS12532	1.99665	2.98562	2.41094	1	0.58021	0.27189	-0.30832	1	0	0	1	875
NM_054055	Slc13a3	chr2_165296697-165300698	TSS12534	0.0489283	0.0800044	0.0404879	1	0.698142	-0.267167	-0.96531	2	1	625	1	525
NM_001007581	2810408M09Rik	chr2_165316814-165320815	TSS12535	6.65678	7.98498	6.27798	1	0.262428	-0.084511	-0.346939	1	0	0	1	1625
NM_027230	Zmynd8	chr2_165708251-165712252	TSS12536	20.9345	19.6773	23.8033	1	-0.0893458	0.185271	0.274617	1	0	0	3	3401
NM_028072	Sulf2	chr2_165979183-165983184	TSS12537	29.04	35.8285	34.1329	1	0.303057	0.233114	-0.0699427	1	0	0	2	2701
NM_177782	Prex1	chr2_166537332-166541333	TSS12538	4.08181	4.37073	4.2056	1	0.0986419	0.0430922	-0.0555497	2	1	468	1	1975
NM_011490	Stau1	chr2_166819778-166823779	TSS12539	19.0032	21.4059	19.4951	3	0.171756	0.0368658	-0.13489	1	0	0	1	1975
NR_030669	1700034H15Rik	chr1_193729406-193733407	TSS1254	0.283136	0.387361	0.236841	1	0.450817	-0.256584	-0.707401	1	0	0	1	3932
NM_001033196	Znfx1	chr2_166886515-166890516	TSS12540	3.28378	2.70941	2.95784	1	-0.277286	-0.150765	0.126521	1	0	0	1	3566
NM_008420	Kcnb1	chr2_167012318-167016319	TSS12541	1.1487	1.12832	1.42687	1	-0.0258031	0.312607	0.33841	2	3	2144	1	2650
NM_008968	Ptgis	chr2_167064037-167068038	TSS12542	5.26504	5.04531	7.02868	1	-0.0614896	0.416741	0.47823	1	0	0	1	800
NM_019835	B4galt5	chr2_167172678-167176679	TSS12543	8.85689	10.4101	10.0516	1	0.233088	0.182534	-0.0505538	1	0	0	1	2075
NM_170756	Spata2	chr2_167316374-167320375	TSS12544	7.3084	7.58043	7.83225	1	0.052717	0.099858	0.047141	1	0	0	1	2000
NM_023230	Ube2v1	chr2_167455505-167459506	TSS12545	58.8546	64.5741	50.1588	1	0.133798	-0.230648	-0.364446	1	0	0	1	2400
NM_145538	Tmem189	chr2_167485044-167489045	TSS12546	10.6407	12.2108	11.6716	1	0.198547	0.133397	-0.0651499	1	0	0	1	2681
NM_009628	Adnp	chr2_168030562-168034563	TSS12548	34.0271	34.9529	27.4992	1	0.0387268	-0.307284	-0.346011	1	0	0	1	2688
NM_010072	Dpm1	chr2_168053879-168057880	TSS12549	16.1701	15.809	16.2122	1	-0.0325805	0.00375105	0.0363315	1	0	0	2	2805
NM_011633	Traf5	chr1_193914445-193918446	TSS1255	0.570061	0.405569	0.674752	1	-0.490145	0.242849	0.732994	2	1	1350	1	1250
NM_001081134	Kcng1	chr2_168092831-168096832	TSS12550	0.75809	0.818555	0.367457	1	0.11057	-1.04277	-1.15334	1	0	0	1	950
NM_001037177	Nfatc2	chr2_168413848-168417849	TSS12551	0.464618	0.637729	0.872274	3	0.456057	0.907287	0.45123	1	0	0	1	1450
NM_001136073	Nfatc2	chr2_168413691-168417692	TSS12552	1.38445	0.613832	0.0173145	4	-1.17209	-6.24123	-5.06913	1	0	0	1	1450
NM_015731	Atp9a	chr2_168565300-168569301	TSS12553	7.4447	7.40311	8.14269	1	-0.00808116	0.129275	0.137356	1	0	0	1	2150
NM_175303	Sall4	chr2_168590701-168594702	TSS12554	47.5684	50.6934	42.7867	3	0.0917914	-0.152839	-0.244631	1	0	0	3	3101
NM_009564	Zfp64	chr2_168779087-168783088	TSS12555	13.5696	13.7778	17.1575	1	0.0219657	0.338439	0.316473	1	0	0	1	4001
NR_033634	A630075F10Rik	chr2_169894171-169898172	TSS12556	1.49042	1.26293	0.861368	1	-0.23877	-0.790311	-0.551541	1	0	0	1	550
NR_033632	A630075F10Rik	chr2_169894278-169898279	TSS12557	0	0	0	1	0	0	0	1	0	0	1	550
NM_001033299	Zfp217	chr2_169954720-169958721	TSS12558	3.00998	2.54203	2.55487	1	-0.243685	-0.236419	0.00726598	1	0	0	3	2146
NM_144814	Rcor3	chr1_193959669-193963670	TSS1256	1.70014	2.63466	2.20343	1	0.631662	0.373904	-0.257759	1	0	0	1	2600
NM_009996	Cyp24a1	chr2_170320638-170324639	TSS12561	0	0	0	1	0	0	0	2	2	3387	2	1637
NM_175631	Cbln4	chr2_171866966-171870967	TSS12563	0	0.0189743	0.0238152	1	4.32007	4.63315	0.313079	2	1	1375	1	1900
NM_011497	Aurka	chr2_172194006-172198007	TSS12564	58.2718	66.9098	59.7699	1	0.199416	0.0366206	-0.162796	1	0	0	1	2975
NM_007557	Bmp7	chr2_172763794-172767795	TSS12566	3.85246	4.85803	5.29543	1	0.334514	0.458866	0.124352	2	1	1706	1	2575
NM_001081387	Ctcfl	chr2_172943026-172947027	TSS12567	0.879181	1.12266	1.01403	1	0.352333	0.20565	-0.146683	1	0	0	2	650
NM_022995	Pmepa1	chr2_173100034-173104035	TSS12569	4.304	4.25404	4.01852	1	-0.0168405	-0.09899	-0.0821495	1	0	0	1	3091
NM_144881	Hhat	chr1_194595413-194599414	TSS1257	0.908869	0.692442	0.490034	1	-0.391884	-0.889836	-0.497952	2	1	50	1	975
NR_027957	Ppp4r1l-ps	chr2_173483040-173487041	TSS12570	1.2455	1.14172	1.07147	1	-0.125411	-0.216946	-0.0915347	1	0	0	1	2175
NR_002846	Nespas	chr2_174118937-174122938	TSS12573	0.954497	1.1749	1.06493	1	0.299442	0.157789	-0.141653	1	0	0	3	3376
NM_022325	Ctsz	chr2_174262493-174266494	TSS12574	40.6252	45.4742	59.511	1	0.16267	0.55077	0.388101	1	0	0	1	1450
NM_025983	Atp5e	chr2_174287602-174291603	TSS12575	135.932	120.938	153.452	1	-0.168616	0.174901	0.343517	1	0	0	2	1300
NM_025531	Slmo2	chr2_174296442-174300443	TSS12576	36.0964	39.6582	32.0571	1	0.135761	-0.171206	-0.306967	1	0	0	1	1700
NM_001085546	Gm14393	chr2_174891264-174895265	TSS12577	8.6091	6.11197	5.42617	1	-0.494157	-0.66583	-0.171673	1	0	0	1	275
NM_001177794	Sertad4	chr1_194675941-194679942	TSS1258	0.896363	0.00474543	2.99577e-05	1	-7.28713	-9.76696	-2.47983	-1	1	67	0	0
NM_001190302	Gm14326	chr2_177689994-177693995	TSS12588	11.8866	10.0499	10.2381	1	-0.242133	-0.215369	0.0267642	1	0	0	1	525
NM_001162922	Zfp931	chr2_177811130-177815131	TSS12589	3.88386	3.52103	2.98846	1	-0.141455	-0.377978	-0.236522	1	0	0	1	275
NM_198247	Sertad4	chr1_194679946-194683947	TSS1259	1.35685	2.15457	1.54345	1	0.666745	0.185769	-0.480976	2	2	1429	1	1925
NM_177191	Sycp2	chr2_178140363-178144364	TSS12590	0.223185	0.220327	0.317804	1	-0.0185103	0.50798	0.52649	2	1	75	1	750
NM_001085501	Ppp1r3d	chr2_178147177-178151178	TSS12591	0.29508	0.201866	0.152274	1	-0.54546	-0.949874	-0.404414	2	1	300	1	1575
NM_001081092	Taf4a	chr2_179709351-179713352	TSS12592	10.6813	10.8979	8.80274	1	0.0289602	-0.279034	-0.307994	1	0	0	2	2824
NM_011969	Psma7	chr2_179775107-179779108	TSS12593	152.734	180.994	148.23	1	0.244919	-0.0431835	-0.288103	1	0	0	1	3125
NM_133849	Hrh3	chr2_179836927-179840928	TSS12594	0.19747	0.453676	0.612159	1	1.19592	1.62734	0.431422	2	2	1373	1	2275
NM_001081171	Lama5	chr2_179958564-179962565	TSS12595	28.7508	24.4015	33.5693	1	-0.236623	0.223533	0.460156	1	0	0	2	3576
NM_145851	Cables2	chr2_180006170-180010171	TSS12596	3.68144	3.38972	2.57105	1	-0.11907	-0.517743	-0.398673	1	0	0	2	1275
NM_173031	BC066135	chr2_180022584-180026585	TSS12597	0.138884	0.0802446	0.042135	1	-0.783887	-1.6973	-0.913413	1	0	0	1	1400
NM_008093	Gata5	chr2_180067384-180071385	TSS12598	0.021706	0.0696216	0.0960978	1	1.63704	2.09637	0.459329	2	1	3935	1	1450
NM_178254	Tcfl5	chr2_180375396-180379397	TSS12599	10.1385	11.1494	6.36556	1	0.137109	-0.671401	-0.808509	1	0	0	1	1600
NM_144882	Spats2l	chr1_57829704-57833705	TSS126	1.24646	0.719244	1.45541	2	-0.792431	0.22343	1.01586	2	2	275	1	1750
NM_181546	Syt14	chr1_194859892-194863893	TSS1260	2.28269	1.55903	1.89549	1	-0.549793	-0.268035	0.281758	1	0	0	2	1175
NM_175551	Dido1	chr2_180434805-180438806	TSS12600	2.986	2.31194	0.36813	4	-0.368969	-3.0165	-2.64753	1	0	0	2	2600
NM_177852	Dido1	chr2_180442704-180446705	TSS12601	17.5707	20.6524	12.4135	3	0.233126	-0.501224	-0.734349	1	0	0	1	3871
NM_080641	Bhlhe23	chr2_180509605-180513606	TSS12602	0.158097	0.033812	0.0508986	1	-2.19225	-1.61614	0.576111	2	1	3520	1	1925
NM_173761	Ythdf1	chr2_180653641-180657642	TSS12603	40.2445	49.1515	41.0927	1	0.288437	0.0300898	-0.258348	1	0	0	1	2100
NM_001141933	Nkain4	chr2_180687404-180691405	TSS12604	3.05102	1.32456	2.17182	2	-1.20316	-0.490191	0.712974	1	0	0	1	2175
NM_015730	Chrna4	chr2_180771882-180775883	TSS12605	0.162353	0.137778	0.0863236	1	-0.235214	-0.903549	-0.668335	2	2	1550	1	1300
NM_001006679	Kcnq2	chr2_180867930-180871931	TSS12606	0.641726	0.74272	0.322808	16	0.210556	-0.989066	-1.19962	2	1	225	1	1525
NM_007906	Eef1a2	chr2_180889720-180893721	TSS12607	0.575491	0.895429	0.379503	1	0.636891	-0.59939	-1.23628	2	2	325	1	900
NM_011481	Srms	chr2_180945876-180949877	TSS12609	0.146843	0.123879	0.130033	1	-0.243535	-0.174136	0.0693993	1	0	0	1	1375
NM_145415	Diexf	chr1_194954445-194958446	TSS1261	7.64899	7.77589	6.58795	1	0.0237355	-0.215409	-0.239145	1	0	0	2	1400
NM_183162	BC006779	chr2_180974732-180978733	TSS12610	0.932886	0.609055	0.803497	1	-0.614307	-0.215159	0.399148	1	0	0	2	383
NM_198169	Gmeb2	chr2_181020671-181024672	TSS12611	7.10508	7.10841	6.11497	1	0.000675907	-0.216473	-0.217149	1	0	0	2	1575
NM_009133	Stmn3	chr2_181047205-181051206	TSS12612	2.67515	3.13077	3.9745	1	0.226819	0.570977	0.344158	1	0	0	1	1050
NR_028585	Arfrp1	chr2_181098109-181102110	TSS12613	8.45713	8.43526	8.4884	5	-0.00373632	0.00532369	0.00906001	1	0	0	1	2700
NM_028125	Zbtb46	chr2_181192131-181196132	TSS12615	0.594243	0.673559	0.564914	1	0.180466	-0.0728959	-0.253362	2	3	1044	2	2425
NM_026765	Uckl1	chr2_181314678-181318679	TSS12616	10.7218	9.20137	11.1321	1	-0.220604	0.0541737	0.274778	1	0	0	1	1675
NM_001164597	Znf512b	chr2_181325166-181329167	TSS12617	7.78021	8.62025	5.28152	1	0.147903	-0.558768	-0.706671	1	0	0	1	1900
NM_172676	Samd10	chr2_181331852-181335853	TSS12618	1.9803	2.63861	2.31823	1	0.413877	0.227199	-0.186679	1	0	0	2	1803
NM_009236	Sox18	chr2_181404345-181408346	TSS12619	0.369507	0.325746	0.392361	1	-0.181331	0.0863531	0.267684	2	1	3355	1	1825
NM_026446	Rgs19	chr2_181426629-181430630	TSS12620	7.78809	9.25922	6.98224	1	0.249592	-0.157558	-0.40715	1	0	0	1	1625
NM_199023	4930526D03Rik	chr2_181431147-181435148	TSS12621	0.0566446	0.222198	0	1	1.95307	-5.84911	-7.80218	1	0	0	1	775
NM_013920	Hnf4g	chr3_3506029-3510030	TSS12622	0.165907	0.113441	0.151212	1	-0.54444	-0.132962	0.411478	1	0	0	1	575
NM_030708	Zfhx4	chr3_5216553-5220554	TSS12623	0.250093	0.322408	0.32283	1	0.365134	0.367015	0.00188128	2	1	900	1	1725
NM_008862	Pkia	chr3_7364603-7368604	TSS12624	0.556868	0.592944	0.365025	1	0.0904031	-0.607982	-0.698385	1	0	0	1	975
[truncated: 14,343 more rows]

## Sheet: RNA-Seq Analyses-D3
Table S2: RNA-Seq analyses of Day 3 EBs generated from WT, KD and AP3 ESCs (Genome Build: mm9)
RNA-Seq analyses
RefseqID	GeneID	Location	CuffLinks_TSS	H2A.ZWT_RPKM	H2A.ZKD_RPKM	H2A.ZAP3_RPKM	Number_of_isoforms_sharing_this_TSS	log2(fc H2A.ZKD/H2A.ZWT)	log2(fcH2A.ZAP3/H2A.ZWT)	log2(fc H2A.ZAP3/H2A.ZKD)	HistoneMark	Number_of_regions_with_H3K27me3_marks	length_H3K27me3-bound-regions	Number_of_regions_with_H3K4me4_marks	length_H3K4me3-bound-regions
NM_008866	Lypla1	chr1_4795973-4799974	TSS1	55.1144	56.3377	52.8782	1	0.0316708	-0.0597551	-0.0914259	1	0	0	2	1425
NM_021511	Rrs1	chr1_9533488-9537489	TSS10	39.8144	37.592	49.1865	1	-0.0828625	0.304965	0.387828	1	0	0	1	2025
NM_024283	1500015O10Rik	chr1_43785446-43789447	TSS100	0.055631	0.160925	0.17961	1	1.51566	1.67321	0.157552	1	0	0	1	575
NM_182716	Nfasc	chr1_134636374-134640375	TSS1001	0	0	0.49977	2	0	8.968	8.968	1	0	0	1	1275
NM_001160317	Nfasc	chr1_134636374-134640375	TSS1002	1.49922	1.27875	0.519006	5	-0.229309	-1.52857	-1.29926	1	0	0	1	1275
NM_008139	Gnaq	chr19_16205320-16209321	TSS10023	11.2632	10.7862	10.3988	1	-0.0624244	-0.115189	-0.0527647	1	0	0	1	2050
NM_008137	Gna14	chr19_16508156-16512157	TSS10025	1.28466	1.05851	2.49883	1	-0.279112	0.959321	1.23843	1	0	0	1	1925
NM_181348	Prune2	chr19_17028607-17032608	TSS10026	2.33558	1.30614	1.88125	1	-0.837985	-0.31194	0.526045	2	1	175	1	800
NM_019437	Rfk	chr19_17466532-17470533	TSS10027	18.4143	22.5938	19.3036	1	0.295086	0.0680398	-0.227046	1	0	0	1	1075
NM_145497	BC016495	chr19_18704505-18708506	TSS10028	8.49603	9.66827	9.20337	1	0.186448	0.11536	-0.071088	1	0	0	1	1250
NM_026120	2410127L17Rik	chr19_18743269-18747270	TSS10029	38.6554	45.4308	36.3277	1	0.232995	-0.0895975	-0.322593	1	0	0	1	1325
NM_008575	Mdm4	chr1_134919925-134923926	TSS1003	32.5038	38.9871	23.1546	1	0.262381	-0.489292	-0.751673	1	0	0	2	2150
NM_177640	D030056L22Rik	chr19_18785725-18789726	TSS10030	17.9807	20.7532	19.3895	1	0.206874	0.108821	-0.0980533	1	0	0	1	2275
NM_153417	Trpm6	chr19_18822472-18826473	TSS10031	0.313549	0.504138	0.140039	1	0.683393	-1.15719	-1.84058	1	0	0	1	800
NM_009551	Zfand5	chr19_21344767-21348768	TSS10034	33.1285	36.4663	32.6015	1	0.138487	-0.0231338	-0.161621	1	0	0	3	2193
NM_146096	Fam108b	chr19_21725798-21729799	TSS10035	9.95146	10.3856	13.438	1	0.0615984	0.433301	0.371702	1	0	0	1	1925
NM_031997	Tmem2	chr19_21850831-21854832	TSS10036	21.7252	19.3222	21.4771	2	-0.169103	-0.0165708	0.152532	1	0	0	1	2500
NM_001035243	Trpm3	chr19_22211606-22215607	TSS10037	0.0134982	0	0.0319425	11	-3.8578	1.18408	5.04188	1	0	0	1	750
NM_177341	Trpm3	chr19_22520697-22524698	TSS10038	0.000639978	0.000218538	0.000150683	4	-0.428525	-0.511186	-0.0826608	1	0	0	1	225
NM_177341	Trpm3	chr19_22520697-22524698	TSS10039	0	0	0	2	0	0	0	1	0	0	1	225
NM_011439	Sox13	chr1_135318789-135322790	TSS1004	8.01834	7.1605	7.80814	1	-0.163222	-0.0383198	0.124902	1	0	0	1	2511
NM_010638	Klf9	chr19_23213715-23217716	TSS10041	33.7738	31.3037	28.5677	1	-0.109568	-0.241512	-0.131944	1	0	0	1	2766
NR_035423	Mir1192	chr19_23221920-23225921	TSS10042	0	1.28642	0.855982	1	10.3303	9.74312	-0.587146	1	0	0	3	2476
NM_028208	Ptar1	chr19_23759889-23763890	TSS10043	0.837755	1.71948	0.8912	1	1.03649	0.0891177	-0.947372	1	0	0	2	1175
NM_177034	Apba1	chr19_23831365-23835366	TSS10044	0.487675	0.318717	0.2253	1	-0.61208	-1.11064	-0.498559	2	1	400	1	1825
NM_028785	Dock8	chr19_25072018-25076019	TSS10046	0.213926	0.292519	0.254879	1	0.449614	0.251622	-0.197992	2	3	2019	1	1025
NM_181404	Kank1	chr19_25309691-25313692	TSS10047	4.92662	4.55627	3.57382	1	-0.112721	-0.46302	-0.350299	1	0	0	1	2075
NM_015826	Dmrt1	chr19_25578195-25582196	TSS10048	21.6111	16.6595	10.4396	1	-0.375408	-1.04963	-0.674227	2	2	425	1	1650
NM_177360	Dmrt3	chr19_25683026-25687027	TSS10049	0.883407	0.783244	0.384215	1	-0.173408	-1.19905	-1.02564	2	3	3126	1	1650
NM_009227	Snrpe	chr1_135504857-135508858	TSS1005	196.491	206.127	246.348	1	0.0690699	0.326233	0.257163	1	0	0	1	1475
NM_145831	Dmrt2	chr19_25744900-25748901	TSS10050	0.266236	0.0390177	0.0475749	1	-2.7394	-2.45983	0.279573	2	4	2826	2	1975
NM_011416	Smarca2	chr19_26677649-26681650	TSS10051	1.56763	2.76705	1.18205	1	0.819365	-0.406994	-1.22636	2	5	1625	1	2950
NM_026003	Smarca2	chr19_26820892-26824893	TSS10052	1.85059	2.2226	0.912029	1	0.264133	-1.02003	-1.28416	1	0	0	1	375
NM_013703	Vldlr	chr19_27289509-27293510	TSS10054	2.20919	2.15366	1.79748	2	-0.0367108	-0.297391	-0.260681	2	2	1175	1	2610
NM_183179	Kcnv2	chr19_27395108-27399109	TSS10055	0.0216081	0.0259734	0.0431327	1	0.254698	0.965008	0.710311	1	0	0	1	975
NR_027987	C030016D13Rik	chr19_27502526-27506527	TSS10056	0.282977	0.0592072	0.0228101	1	-2.23777	-3.57613	-1.33836	1	0	0	1	2550
NM_009199	Slc1a1	chr19_28907655-28911656	TSS10057	0.153305	0.283385	0.229238	1	0.882061	0.577341	-0.304719	2	2	625	1	1425
NM_028922	Ppapdc2	chr19_29036409-29040410	TSS10058	1.72846	1.94558	1.4199	1	0.17062	-0.283517	-0.454137	1	0	0	1	1250
NM_025950	Cdc37l1	chr19_29062983-29066984	TSS10059	20.4273	20.1052	16.798	1	-0.0229287	-0.282194	-0.259265	1	0	0	2	1825
NM_144530	Zc3h11a	chr1_135555957-135559958	TSS1006	47.1707	46.8015	45.7993	1	-0.011336	-0.0425645	-0.0312285	1	0	0	2	1300
NR_028360	1700018L02Rik	chr19_29119972-29123973	TSS10060	0.344548	0.516297	0.195575	1	0.582107	-0.813806	-1.39591	1	0	0	1	1125
NM_021525	Rcl1	chr19_29173864-29177865	TSS10061	28.8953	26.0809	38.3215	1	-0.147836	0.407307	0.555143	1	0	0	2	1875
NM_008413	Jak2	chr19_29324317-29328318	TSS10063	4.64931	4.28874	3.71352	2	-0.116437	-0.324151	-0.207714	2	1	200	1	1750
NM_021893	Cd274	chr19_29439927-29443928	TSS10064	0.849054	1.11962	0.838764	1	0.398671	-0.0175705	-0.416241	1	0	0	1	550
NM_001081319	C030046E11Rik	chr19_29594771-29598772	TSS10066	7.22008	8.1547	6.78007	1	0.175594	-0.0907017	-0.266296	1	0	0	1	1950
NM_001166552	Zbed6	chr1_135555462-135559463	TSS1007	11.1913	16.6214	6.29519	1	0.570622	-0.829956	-1.40058	1	0	0	2	1300
NM_144873	Uhrf2	chr19_30103002-30107003	TSS10071	21.547	24.6003	20.0069	1	0.191181	-0.106984	-0.298165	1	0	0	1	1900
NM_031249	Cstf2t	chr19_31155330-31159331	TSS10073	13.973	11.7735	11.9989	1	-0.247079	-0.219723	0.0273566	1	0	0	1	2531
NR_033198	2700046G09Rik	chr19_32461705-32465706	TSS10075	1.2783	0.912748	0.491142	1	-0.485486	-1.37821	-0.892722	1	0	0	1	3270
NM_010799	Minpp1	chr19_32558258-32562259	TSS10076	16.0731	16.1586	16.7995	1	0.00765353	0.0637662	0.0561127	1	0	0	1	1800
NM_011864	Papss2	chr19_32692494-32696495	TSS10077	0.479394	0.315026	0.394221	1	-0.604175	-0.281559	0.322616	1	0	0	1	175
NM_008960	Pten	chr19_32830066-32834067	TSS10078	29.6562	36.4731	36.8359	1	0.29849	0.312769	0.0142793	1	0	0	2	3551
NM_172842	Lax1	chr1_135584593-135588594	TSS1008	0.0821067	0.144681	0.087224	2	0.809775	0.0862067	-0.723568	1	0	0	2	675
NM_029682	Stambpl1	chr19_34264759-34268760	TSS10083	1.74711	0.807688	1.55064	1	-1.11214	-0.172002	0.940139	1	0	0	1	1125
NM_001146708	Fas	chr19_34363148-34367149	TSS10084	0.0946881	0	0.0974884	2	-6.58027	0.0416143	6.62188	1	0	0	1	525
NM_008332	Ifit2	chr19_34623183-34627184	TSS10085	0.615989	0.91557	0.718737	1	0.571	0.222225	-0.348775	1	0	0	1	750
NM_183046	Kif20b	chr19_34994847-34998848	TSS10089	28.7757	36.3827	25.319	1	0.338391	-0.184624	-0.523015	1	0	0	2	1350
NM_001167949	Atp2b4	chr1_135648324-135652325	TSS1009	0.833208	0.43799	0.418713	4	-0.926218	-0.991002	-0.064784	0	0	0	0	0
NM_019428	Rpp30	chr19_36156205-36160206	TSS10090	22.1998	25.2123	24.4504	1	0.183573	0.139305	-0.0442679	1	0	0	1	1200
NM_172637	Hectd2	chr19_36627128-36631129	TSS10092	1.70982	2.42327	1.35883	2	0.502866	-0.331258	-0.834124	1	0	0	1	1700
NM_001163635	Tnks2	chr19_36906721-36910722	TSS10093	104.39	124.361	106.878	1	0.252548	0.0339811	-0.218567	1	0	0	2	2722
NM_001080706	Btaf1	chr19_36998568-37002569	TSS10094	13.3963	15.2505	12.9196	1	0.187009	-0.0522692	-0.239278	1	0	0	1	1300
NM_001164336	2016-03-06	chr19_37280034-37284035	TSS10095	29.1264	30.4848	40.0872	3	0.0657629	0.460802	0.395039	1	0	0	2	2485
NM_010615	Kif11	chr19_37448892-37452893	TSS10096	43.0916	50.705	40.014	1	0.234716	-0.106899	-0.341616	1	0	0	3	2100
NM_008245	Hhex	chr19_37507330-37511331	TSS10097	4.82229	5.39305	5.99591	1	0.161351	0.314202	0.15285	2	3	570	2	2456
NM_175353	Exoc6	chr19_37622907-37626908	TSS10098	11.7207	13.7497	12.2069	1	0.230323	0.0586332	-0.17169	1	0	0	1	1150
NM_001105201	Cyp26c1	chr19_37758169-37762170	TSS10099	0.265986	0.103392	0.110947	1	-1.35475	-1.25395	0.100805	2	3	2395	3	1970
NM_009418	Tpp2	chr1_43988851-43992852	TSS101	33.4602	36.9766	30.2302	1	0.144162	-0.146451	-0.290613	1	0	0	1	1650
NM_001160422	Optc	chr1_135801750-135805751	TSS1010	0	1.00896e-06	1.68692e-07	4	0.00145489	0.000243351	-0.00121154	1	0	0	2	776
NM_007811	Cyp26a1	chr19_37770297-37774298	TSS10100	4.06425	14.0496	3.81878	1	1.78922	-0.0898545	-1.87907	2	2	2798	1	2300
NM_028293	Cep55	chr19_38127514-38131515	TSS10101	29.076	28.7853	30.5387	6	-0.0144975	0.0708059	0.0853034	1	0	0	5	2190
NM_181748	O3far1	chr19_38169568-38173569	TSS10102	0.242117	0.137075	0.10859	1	-0.816199	-1.14953	-0.333336	2	1	1975	1	1100
NM_175507	Tmem20	chr19_38468469-38472470	TSS10105	6.32539	8.41031	6.67113	1	0.410948	0.0767649	-0.334183	1	0	0	2	1700
NM_019588	Plce1	chr19_38596686-38600687	TSS10106	1.07	1.22353	1.09808	1	0.19327	0.0373379	-0.155932	1	0	0	1	625
NM_145952	Tbc1d12	chr19_38909068-38913069	TSS10107	2.15212	2.66461	2.13731	1	0.308037	-0.00995771	-0.317995	1	0	0	1	1500
NM_008234	Hells	chr19_39003479-39007480	TSS10108	110.42	125.458	115.948	1	0.184201	0.0704758	-0.113726	1	0	0	4	2675
NM_001160420	Optc	chr1_135802576-135806577	TSS1011	0	0.0779434	0.0050113	2	6.30275	2.58768	-3.71507	2	1	300	2	875
NM_009848	Entpd1	chr19_40732283-40736284	TSS10117	0	0	0.0144201	1	0	3.94674	3.94674	1	0	0	1	525
NM_172839	Ccnj	chr19_40903768-40907769	TSS10118	4.01726	4.68491	4.57258	1	0.221758	0.186753	-0.0350054	1	0	0	1	1825
NM_028319	Zfp518a	chr19_40967194-40971195	TSS10119	11.9244	14.0692	12.1976	1	0.238605	0.0326779	-0.205927	1	0	0	1	1600
NM_008043	Frat1	chr19_41902459-41906460	TSS10122	1.65147	1.28263	1.30835	1	-0.364395	-0.335773	0.0286214	2	2	625	1	2635
NM_023418	Pgam1	chr19_41984360-41988361	TSS10123	268.445	296.059	335.921	1	0.141258	0.323494	0.182237	1	0	0	1	2361
NM_023740	Zdhhc16	chr19_42005961-42009962	TSS10124	16.1498	14.6181	17.1277	1	-0.143751	0.08481	0.228561	1	0	0	1	2100
NM_145500	Ubtd1	chr19_42054252-42058253	TSS10125	7.04535	5.09897	6.72672	1	-0.466387	-0.0667585	0.399629	1	0	0	1	2450
NM_020033	Ankrd2	chr19_42108527-42112528	TSS10126	0.208792	0.0215176	0.0263688	1	-3.21983	-2.93836	0.281479	1	0	0	2	1123
NM_026152	Hoga1	chr19_42118340-42122341	TSS10127	0.273246	0.595767	0.485175	1	1.1217	0.826005	-0.295692	1	0	0	1	675
NM_145501	Pi4k2a	chr19_42162924-42166925	TSS10129	10.9372	9.89102	11.2268	1	-0.145038	0.0376999	0.182738	1	0	0	3	1825
NM_007570	Btg2	chr1_135973732-135977733	TSS1013	11.7011	13.671	12.556	1	0.224457	0.101724	-0.122732	1	0	0	1	2375
NM_183195	Marveld1	chr19_42219878-42223879	TSS10130	7.17429	6.60063	7.9082	1	-0.120215	0.140495	0.260709	1	0	0	1	2225
NM_001164531	Zfyve27	chr19_42243056-42247057	TSS10131	5.93653	5.04778	5.21573	2	-0.233928	-0.186717	0.047211	1	0	0	1	1500
NM_027694	Golga7b	chr19_42328228-42332229	TSS10133	0.0504506	0.0895513	0.125198	1	0.815547	1.29443	0.478882	2	1	725	1	550
NM_177464	D19Ertd386e	chr19_42591294-42595295	TSS10134	5.42008	5.43085	5.09116	1	0.00286334	-0.0903025	-0.0931659	1	0	0	2	1425
NM_031396	Cnnm1	chr19_43512925-43516926	TSS10135	0.367435	0.652881	0.33778	1	0.827618	-0.121061	-0.948679	1	0	0	1	1925
NM_008699	Nkx2-3	chr19_43684814-43688815	TSS10136	0.0429868	0.0743353	0.0437551	1	0.776255	0.0249814	-0.751274	2	3	3376	3	1401
NM_053103	Entpd7	chr19_43762178-43766179	TSS10137	0.912899	1.37649	1.21241	1	0.591935	0.40896	-0.182975	1	0	0	1	1100
NM_025530	Cutc	chr19_43825512-43829513	TSS10138	6.86646	7.64588	7.48034	2	0.155095	0.123521	-0.0315745	1	0	0	2	1250
NM_001039510	Adora1	chr1_136130008-136134009	TSS1014	0.685247	1.239	0.764605	2	0.853541	0.157872	-0.695669	2	2	3459	1	1625
NM_009128	Scd2	chr19_44366165-44370166	TSS10142	56.6519	85.3165	80.0338	1	0.590692	0.498478	-0.0922143	1	0	0	1	3141
NM_176958	Hif1an	chr19_44635343-44639344	TSS10145	16.1432	14.1992	13.9363	1	-0.185105	-0.212065	-0.0269601	1	0	0	1	1075
NM_011037	Pax2	chr19_44829883-44833884	TSS10146	0	0	0.0279925	1	0	4.85761	4.85761	2	2	3726	2	2592
NM_001081225	Fam178a	chr19_45003608-45007609	TSS10147	17.137	19.8707	15.8844	1	0.213517	-0.109497	-0.323014	1	0	0	2	1350
NM_011976	Sema4g	chr19_45061833-45065834	TSS10148	4.91479	6.13602	4.76968	1	0.320115	-0.0432284	-0.363343	2	1	50	1	1425
NM_153796	Peo1	chr19_45079047-45083048	TSS10149	12.136	12.7216	11.5546	1	0.0679817	-0.0708197	-0.138801	1	0	0	1	2800
NM_145503	Lzts2	chr19_45087665-45091666	TSS10150	29.0825	21.0049	19.2056	2	-0.469407	-0.598598	-0.129191	1	0	0	1	2291
NM_001130526	Lzts2	chr19_45090624-45094625	TSS10151	5.54829	5.86972	6.48582	1	0.0812343	0.225208	0.143974	1	0	0	1	2876
NM_053197	Sfxn3	chr19_45120065-45124066	TSS10152	2.56034	2.1303	2.63663	6	-0.265162	0.0423442	0.307507	1	0	0	1	2225
NM_178929	Kazald1	chr19_45148628-45152629	TSS10153	0.567856	0.869414	1.22353	1	0.613638	1.10609	0.492454	2	1	1554	2	2625
NM_021901	Tlx1	chr19_45223204-45227205	TSS10154	0.0634356	0	0.0322251	1	-6.00979	-0.955584	5.0542	2	2	2905	1	1000
NM_001037758	Btrc	chr19_45436223-45440224	TSS10155	7.93747	7.2098	6.20708	2	-0.138702	-0.354714	-0.216013	1	0	0	1	1100
NM_172639	Dpcd	chr19_45633104-45637105	TSS10156	9.42439	6.95757	7.4784	1	-0.437761	-0.33363	0.104132	1	0	0	1	1500
NM_176785	Hps6	chr19_46075967-46079968	TSS10157	1.28672	1.5816	1.51674	1	0.297478	0.237106	-0.060372	1	0	0	1	2418
NM_001081214	Pprc1	chr19_46129028-46133029	TSS10158	29.4221	30.3537	29.9684	1	0.0449707	0.0265409	-0.0184297	1	0	0	2	2404
NM_001039352	Nolc1	chr19_46148352-46152353	TSS10159	68.1139	63.3149	75.9856	4	-0.105402	0.157774	0.263176	1	0	0	3	2328
NM_020588	Tmem183a	chr1_136256576-136260577	TSS1016	36.3296	37.4825	42.0647	2	0.0450686	0.21146	0.166391	1	0	0	1	1825
NM_007703	Elovl3	chr19_46204388-46208389	TSS10160	0.0278089	0.0228398	0.0266162	1	-0.273142	-0.0609998	0.212143	2	3	489	1	575
NM_178930	Gbf1	chr19_46225047-46229048	TSS10161	9.43972	11.0178	10.0187	1	0.222998	0.0858705	-0.137128	1	0	0	1	1525
NM_001177369	Nfkb2	chr19_46377226-46381227	TSS10162	9.15066	8.58439	9.45308	3	-0.0921498	0.046903	0.139053	1	0	0	1	2550
NM_019408	Nfkb2	chr19_46378184-46382185	TSS10163	0.865825	0.334586	0.378838	1	-1.36906	-1.19036	0.178702	1	0	0	1	2550
NM_001177370	Nfkb2	chr19_46378419-46382420	TSS10164	0.00109241	0	0	1	-1.06517	-1.06517	0	1	0	0	1	2431
NM_133694	Fbxl15	chr19_46400673-46404674	TSS10165	0.901476	1.39798	1.18219	1	0.632415	0.390721	-0.241694	1	0	0	1	3175
NM_029186	Tmem180	chr19_46429369-46433370	TSS10167	26.3359	33.2267	30.0984	1	0.335301	0.192649	-0.142652	1	0	0	1	2495
NM_015752	Sufu	chr19_46469407-46473408	TSS10168	5.21232	4.72978	5.49848	2	-0.140124	0.0770928	0.217217	1	0	0	3	2343
NM_053100	Trim8	chr19_46574137-46578138	TSS10169	19.0075	15.3504	17.0324	1	-0.308274	-0.158278	0.149996	1	0	0	1	4001
NM_053196	Sfxn2	chr19_46645854-46649855	TSS10170	3.7403	4.00113	4.42468	1	0.0972284	0.242359	0.145131	1	0	0	2	1975
NM_146099	D19Wsu162e	chr19_46671595-46675596	TSS10171	11.6681	9.74542	11.3508	2	-0.259751	-0.0397709	0.219981	1	0	0	1	1275
NM_001177813	D19Wsu162e	chr19_46695890-46699891	TSS10172	0	0.775811	0.600318	1	9.60142	9.23198	-0.369435	1	0	0	1	150
NM_025563	2010012O05Rik	chr19_46762395-46766396	TSS10173	2.77713	2.55329	3.48669	1	-0.121192	0.328158	0.449349	1	0	0	1	850
NM_020577	As3mt	chr19_46779932-46783933	TSS10174	3.77432	5.14961	5.05712	1	0.448144	0.422002	-0.026142	1	0	0	1	1125
NM_033569	Cnnm2	chr19_46834098-46838099	TSS10175	6.03804	4.62452	5.14737	2	-0.384704	-0.230203	0.154501	1	0	0	1	2750
NM_146100	Ina	chr19_47087187-47091188	TSS10176	16.8215	21.3829	25.2889	1	0.346133	0.588169	0.242036	2	1	225	1	3425
NM_177342	Taf5	chr19_47140237-47144238	TSS10177	10.4674	9.83005	11.1444	1	-0.0906235	0.0904074	0.181031	1	0	0	3	1650
NM_011053	Pdcd11	chr19_47163255-47167256	TSS10178	27.4883	27.5853	26.0372	1	0.0050818	-0.0782405	-0.0833222	1	0	0	1	1800
NM_021360	Neurl1a	chr19_47251309-47255310	TSS10179	0.838119	0.986122	0.568096	1	0.234353	-0.560203	-0.794556	1	0	0	1	2450
NM_001081307	Ppp1r12b	chr1_136850517-136854518	TSS1018	0.510383	0.884923	0.596729	1	0.792777	0.225087	-0.56769	1	0	0	1	900
NM_001163480	Neurl1a	chr19_47301332-47305333	TSS10180	3.97754	3.74213	3.01608	1	-0.0879939	-0.399086	-0.311092	1	0	0	1	425
NM_001164639	Slk	chr19_47652508-47656509	TSS10181	16.81	17.5107	14.9202	2	0.058912	-0.172042	-0.230954	1	0	0	1	2275
NM_026377	Sfr1	chr19_47804245-47808246	TSS10182	94.4237	96.4891	103.516	1	0.0312166	0.132632	0.101415	1	0	0	1	1475
NM_010362	Gsto1	chr19_47927478-47931479	TSS10183	24.8126	27.4952	29.194	1	0.148101	0.23459	0.0864891	1	0	0	1	1300
NM_026619	Gsto2	chr19_47938283-47942284	TSS10184	0.642709	0.279309	0.401519	1	-1.19939	-0.677352	0.522039	1	0	0	1	500
NM_001163267	Ccdc147	chr19_48010201-48014202	TSS10185	0.0202218	0	0	1	-4.40748	-4.40748	0	1	0	0	1	325
NM_025696	Sorcs3	chr19_48278514-48282515	TSS10186	0	0.0140352	0.00861019	1	3.91027	3.26456	-0.645707	2	4	2740	2	2100
NR_030678	AA387883	chr19_52995670-52999671	TSS10188	0	0	0	1	0	0	0	1	0	0	1	200
NM_001164101	Add3	chr19_53212934-53216935	TSS10189	0	0.123128	0.132376	2	6.95568	7.05936	0.103673	1	0	0	2	1360
NM_001164100	Add3	chr19_53215245-53219246	TSS10190	34.5324	21.3668	31.5317	3	-0.692554	-0.131145	0.561409	1	0	0	2	2405
NM_013758	Add3	chr19_53216486-53220487	TSS10191	1.1414	8.7603	2.81753	1	2.93908	1.30288	-1.6362	1	0	0	1	1814
NM_001008542	Mxi1	chr19_53382995-53386996	TSS10192	1.46131	2.9743	1.81619	1	1.02479	0.31346	-0.711326	2	1	896	1	2246
NM_010847	Mxi1	chr19_53401902-53405903	TSS10193	9.93874	8.99319	7.256	1	-0.144215	-0.453835	-0.30962	1	0	0	1	1425
NM_001008543	Mxi1	chr19_53402935-53406936	TSS10194	0	0.266837	0.220729	1	8.06521	7.79265	-0.272558	1	0	0	1	1425
NM_001085390	Dusp5	chr19_53601807-53605808	TSS10195	3.13276	2.742	3.42751	1	-0.19214	0.129687	0.321827	1	0	0	1	2725
NM_007790	Smc3	chr19_53672885-53676886	TSS10196	77.6435	80.0452	75.0268	1	0.0439492	-0.0494585	-0.0934077	1	0	0	1	1500
NM_001170847	Rbm20	chr19_53749795-53753796	TSS10197	1.33113	1.27358	1.0133	1	-0.063713	-0.39325	-0.329538	2	1	2525	1	1550
NM_001168492	Pdcd4	chr19_53975840-53979841	TSS10198	0	0	0	2	0	0	0	1	0	0	1	1725
NM_001168491	Pdcd4	chr19_53975840-53979841	TSS10199	47.1036	63.6426	33.3044	2	0.434147	-0.500111	-0.934258	1	0	0	1	1725
NM_144558	Bivm	chr1_44174812-44178813	TSS102	5.13764	5.47817	5.83078	1	0.0925708	0.18255	0.0899789	1	0	0	1	2225
NM_001033409	Lgr6	chr1_136999853-137003854	TSS1020	0.10643	0.219218	0.396108	1	1.03554	1.88613	0.850599	2	2	950	1	1450
NM_001168505	Shoc2	chr19_54016795-54020796	TSS10200	16.8335	19.3864	15.4936	1	0.203698	-0.119655	-0.323354	1	0	0	1	2550
NM_019658	Shoc2	chr19_54017365-54021366	TSS10201	2.20135	1.77004	2.62506	1	-0.314447	0.253856	0.568303	1	0	0	1	2550
NM_007417	Adra2a	chr19_54117671-54121672	TSS10202	0.181664	0.117622	0.121682	1	-0.622821	-0.574269	0.048552	2	1	1975	1	2622
NM_027976	Acsl5	chr19_55325858-55329859	TSS10204	4.40737	4.10048	5.84439	1	-0.104101	0.407054	0.511155	1	0	0	1	1600
NM_016862	Vti1a	chr19_55388840-55392841	TSS10205	4.80864	4.27982	4.85633	1	-0.168042	0.0142346	0.182276	1	0	0	1	1600
NM_001142923	Tcf7l2	chr19_55814299-55818300	TSS10206	5.63814	4.91211	4.98916	12	-0.198838	-0.176389	0.0224493	1	0	0	1	2600
NM_001142924	Tcf7l2	chr19_55967810-55971811	TSS10207	0.0782173	0	0	2	-6.30774	-6.30774	0	1	0	0	1	375
NM_007611	Casp7	chr19_56469618-56473619	TSS10209	3.7853	3.19842	3.24996	1	-0.242978	-0.219923	0.0230554	2	1	150	1	1350
NM_007955	Ptprv	chr1_137027152-137031153	TSS1021	0.518101	0.414503	0.403162	1	-0.321156	-0.361082	-0.0399252	1	0	0	2	600
NM_025811	Nhlrc2	chr19_56620750-56624751	TSS10211	11.8157	11.1462	10.0387	1	-0.0841458	-0.235111	-0.150965	1	0	0	1	2125
NM_007419	Adrb1	chr19_56794861-56798862	TSS10212	0.38081	0.270497	0.16926	1	-0.491919	-1.16512	-0.673197	2	3	3176	1	2850
NM_031387	Tdrd1	chr19_56898775-56902776	TSS10213	1.79759	1.26001	0.838492	3	-0.512285	-1.09928	-0.586996	2	3	550	1	575
NM_172840	Vwa2	chr19_56946905-56950906	TSS10215	0.817758	0.984305	1.16405	1	0.267133	0.508883	0.24175	2	2	1606	1	1200
NM_145505	Fam160b1	chr19_57433498-57437499	TSS10216	12.2558	13.5782	10.7329	1	0.147816	-0.191408	-0.339224	1	0	0	3	3151
NM_028115	Trub1	chr19_57525395-57529396	TSS10217	17.7812	15.8278	16.2831	4	-0.167881	-0.12697	0.0409113	1	0	0	1	825
NM_181415	Atrnl1	chr19_57683523-57687524	TSS10218	3.78505	4.03679	3.60916	1	0.0928724	-0.0686307	-0.161503	1	0	0	1	2300
NM_029372	1700011F14Rik	chr19_58584491-58588492	TSS10219	0.101037	0	0	1	-6.67295	-6.67295	0	1	0	0	1	650
NM_134438	Gpr37l1	chr1_137062258-137066259	TSS1022	0.124014	0.0181087	0.0202945	1	-2.70979	-2.55354	0.156251	1	0	0	1	275
NM_178689	Eno4	chr19_59015914-59019915	TSS10223	0.746173	0.67067	0.719991	1	-0.15369	-0.0514611	0.102229	1	0	0	2	1800
NM_207261	Kcnk18	chr19_59292137-59296138	TSS10224	0	0.015362	0.0723594	1	4.03228	6.19691	2.16463	1	0	0	1	500
NM_172523	Slc18a2	chr19_59333367-59337368	TSS10225	1.07873	0.691106	1.00026	1	-0.641606	-0.108854	0.532752	1	0	0	1	1100
NM_010132	Emx2	chr19_59531179-59535180	TSS10226	0.321257	0.255895	0.745315	1	-0.327033	1.21157	1.53861	2	2	3321	1	2100
NM_178421	Nanos1	chr19_60829889-60833890	TSS10228	1.19368	1.43403	1.176	1	0.264457	-0.0215099	-0.285967	1	0	0	1	2000
NM_001167829	Fam45a	chr19_60885472-60889473	TSS10229	7.01581	10.7617	8.00112	2	0.617153	0.189567	-0.427586	1	0	0	1	1250
NM_001163131	Elf3	chr1_137153049-137157050	TSS1023	18.6026	20.0881	14.6017	2	0.110833	-0.349343	-0.460177	1	0	0	1	2751
NM_018869	Grk5	chr19_60963651-60967652	TSS10230	0.664518	0.78745	0.760251	1	0.244542	0.193895	-0.0506471	1	0	0	1	1725
NM_009212	Ighmbp2	chr19_3281010-3285011	TSS10231	3.83707	3.43584	3.29557	1	-0.159298	-0.219415	-0.060117	1	0	0	1	2050
NM_010253	Gal	chr19_3412457-3416458	TSS10232	0.060933	0	0.127717	1	-5.95264	1.05542	7.00806	1	0	0	1	825
NM_001164159	Ppp6r3	chr19_3573749-3577750	TSS10233	59.2733	62.9782	56.8381	7	0.0874671	-0.0605227	-0.14799	1	0	0	1	2275
NM_008513	Lrp5	chr19_3684564-3688565	TSS10234	24.6478	18.81	17.7152	1	-0.389941	-0.476448	-0.0865074	1	0	0	3	2375
NM_016921	Tcirg1	chr19_3903230-3907231	TSS10235	0	0.273904	1.84477	1	8.10278	10.85	2.74722	1	0	0	2	2451
NM_001167784	Tcirg1	chr19_3904983-3908984	TSS10236	0.630546	0.327704	0.567574	1	-0.942099	-0.15154	0.790559	1	0	0	1	1275
NM_001136091	Tcirg1	chr19_3905133-3909134	TSS10237	9.43045	6.24991	5.89428	1	-0.593413	-0.677919	-0.0845059	1	0	0	1	1275
NM_144870	Ndufs8	chr19_3910717-3914718	TSS10238	21.9902	20.4066	21.3941	1	-0.10782	-0.0396459	0.0681739	1	0	0	1	2250
NM_026316	Aldh3b1	chr19_3927716-3931717	TSS10239	0.957696	0.905257	1.07629	1	-0.0811532	0.168261	0.249415	1	0	0	2	1275
NM_001159624	Rnpep	chr1_137178661-137182662	TSS1024	8.51696	8.84652	10.0448	2	0.0547656	0.238006	0.18324	1	0	0	2	1314
NM_133666	Ndufv1	chr19_4010725-4014726	TSS10240	77.6956	62.669	66.9798	1	-0.310076	-0.214104	0.0959726	1	0	0	1	1725
NM_013541	Gstp1	chr19_4035912-4039913	TSS10241	77.6048	78.3011	59.9903	1	0.0128865	-0.371411	-0.384298	1	0	0	2	1250
NM_181796	Gstp2	chr19_4040221-4044222	TSS10242	59.8427	54.673	40.9945	1	-0.130344	-0.545734	-0.415389	1	0	0	2	1050
NM_144869	BC021614	chr19_4057294-4061295	TSS10243	1.96092	1.19074	0.711467	1	-0.719197	-1.46137	-0.742174	1	0	0	2	1175
NM_016666	Aip	chr19_4123827-4127828	TSS10244	24.3081	22.3198	23.3697	1	-0.123108	-0.0567955	0.0663122	1	0	0	1	1900
NM_021485	Rps6kb2	chr19_4161245-4165246	TSS10246	6.77838	3.75197	5.74916	1	-0.853121	-0.237551	0.615569	1	0	0	1	1325
NM_134148	Carns1	chr19_4173479-4177480	TSS10247	0.319698	0.415306	0.243449	1	0.376429	-0.391682	-0.768111	1	0	0	1	675
NM_178650	Tbc1d10c	chr19_4189047-4193048	TSS10248	0.601339	0.674964	0.373054	1	0.166371	-0.687329	-0.8537	1	0	0	3	1598
NM_011237	Rad9	chr19_4199603-4203604	TSS10249	23.0295	24.3886	24.0028	1	0.0827204	0.0597171	-0.0230033	1	0	0	1	2350
NM_011590	Timm17a	chr1_137208314-137212315	TSS1025	78.1832	73.7367	84.7135	1	-0.0844747	0.115732	0.200207	1	0	0	2	1750
NM_198113	Ssh3	chr19_4267172-4271173	TSS10250	2.32304	1.99695	1.72686	1	-0.218114	-0.427649	-0.209534	1	0	0	2	1050
NM_026720	Ankrd13d	chr19_4281137-4285138	TSS10251	3.32362	3.02314	3.04031	1	-0.136665	-0.128497	0.00816795	1	0	0	1	1425
NM_130863	Adrbk1	chr19_4303955-4307956	TSS10252	22.7995	21.6874	24.0187	1	-0.0721418	0.0751527	0.147295	1	0	0	1	1650
NM_001001984	Kdm2a	chr19_4395077-4399078	TSS10253	14.7753	15.2091	13.9878	1	0.0417446	-0.0790129	-0.120757	1	0	0	2	3075
NM_007485	Rhod	chr19_4437424-4441425	TSS10254	3.80063	4.66138	4.23828	1	0.294448	0.157201	-0.137247	1	0	0	2	1700
NM_134164	Syt12	chr19_4475143-4479144	TSS10255	1.33383	1.35802	1.34202	1	0.0259107	0.00882477	-0.0170859	2	3	2032	2	1275
NM_153388	Lrfn4	chr19_4613667-4617668	TSS10257	18.5951	15.0099	16.4204	1	-0.30899	-0.179423	0.129567	1	0	0	1	2708
NM_023131	Rce1	chr19_4623617-4627618	TSS10258	14.1238	14.2741	16.7315	1	0.0152704	0.244423	0.229152	1	0	0	1	2500
NM_009032	Rbm4	chr19_4791877-4795878	TSS10259	8.09379	8.71229	7.25488	1	0.106224	-0.157843	-0.264067	1	0	0	2	2098
NM_175259	Shisa4	chr1_137269640-137273641	TSS1026	5.7491	4.36162	4.15229	1	-0.398392	-0.469332	-0.0709402	1	0	0	1	1275
NM_019869	Rbm14	chr19_4809634-4813635	TSS10260	40.1908	47.1102	48.7071	1	0.229169	0.277261	0.0480916	1	0	0	1	2825
NM_016892	Ccs	chr19_4837322-4841323	TSS10261	34.5746	21.8247	25.9661	1	-0.663726	-0.413069	0.250657	1	0	0	1	1800
NM_013456	Actn3	chr19_4875884-4879885	TSS10262	3.10438	4.03698	5.1968	1	0.378864	0.743131	0.364267	1	0	0	2	3150
NM_001033128	Bbs1	chr19_4904627-4908628	TSS10263	1.16588	0.766019	1.00596	1	-0.605322	-0.21265	0.392672	1	0	0	1	700
NM_133803	Dpp3	chr19_4926287-4930288	TSS10264	57.1062	47.4358	58.1662	1	-0.267666	0.0265332	0.294199	1	0	0	1	1925
NM_172835	Peli3	chr19_4941092-4945093	TSS10265	2.74681	1.90295	1.79554	1	-0.529287	-0.613061	-0.0837745	2	1	50	1	1350
NM_153553	Npas4	chr19_4987971-4991972	TSS10266	0.0552557	0.0722364	0.0133463	1	0.380562	-1.97132	-2.35188	2	2	1800	2	1150
NM_001001885	Tmem151a	chr19_5083477-5087478	TSS10267	1.70866	1.33812	0.884548	1	-0.352424	-0.949067	-0.596643	2	3	1325	1	1350
NM_009920	Cnih2	chr19_5096418-5100419	TSS10268	3.45506	3.06902	5.53368	1	-0.17088	0.679372	0.850252	1	0	0	1	1050
NM_029576	Rab1b	chr19_5104996-5108997	TSS10269	38.4739	33.4278	46.1908	1	-0.202826	0.263719	0.466545	1	0	0	1	1450
NM_153774	Ipo9	chr1_137325068-137329069	TSS1027	28.0351	29.3887	30.7643	1	0.068025	0.134018	0.0659934	1	0	0	1	1300
NM_008451	Klc2	chr19_5116408-5120409	TSS10270	13.416	9.98884	11.6788	1	-0.425529	-0.200047	0.225482	1	0	0	1	1975
NM_153129	Pacs1	chr19_5271119-5275120	TSS10271	8.02724	8.47595	6.60487	1	0.0784615	-0.281335	-0.359797	1	0	0	1	1675
NM_030109	Sf3b2	chr19_5293455-5297456	TSS10272	102.602	93.6939	103.431	1	-0.13103	0.0116097	0.14264	1	0	0	2	2075
NM_028623	Cst6	chr19_5347574-5351575	TSS10273	0.13943	0.0747576	0.089603	1	-0.890389	-0.63222	0.258168	1	0	0	1	600
NM_001038231	Banf1	chr19_5364347-5368348	TSS10274	11.7493	8.4238	15.082	1	-0.479983	0.360226	0.840209	1	0	0	1	3523
NM_011793	Banf1	chr19_5364645-5368646	TSS10275	174.838	135.272	174.358	1	-0.370153	-0.0039662	0.366187	1	0	0	1	3821
NM_016882	Sart1	chr19_5386703-5390704	TSS10276	30.9073	26.6985	29.6709	1	-0.211182	-0.058897	0.152285	1	0	0	1	3029
NM_024176	Drap1	chr19_5422916-5426917	TSS10277	95.0542	83.167	97.5931	1	-0.192737	0.0380284	0.230765	1	0	0	1	3417
NM_198616	Ccdc85b	chr19_5455563-5459564	TSS10278	5.80816	5.23962	6.0721	1	-0.148592	0.0641036	0.212696	1	0	0	2	2212
NM_009985	Ctsw	chr19_5466498-5470499	TSS10279	0.955194	0.523632	0.524175	1	-0.865998	-0.864505	0.00149243	1	0	0	2	300
NM_173437	Nav1	chr1_137479932-137483933	TSS1028	6.46612	5.64934	5.94674	1	-0.194786	-0.120782	0.0740039	2	1	1325	2	2493
NM_027877	Mus81	chr19_5486336-5490337	TSS10280	9.81245	7.03953	7.94344	1	-0.479076	-0.304815	0.174261	1	0	0	2	2762
NM_001024560	Snx32	chr19_5508489-5512490	TSS10281	2.17363	1.52686	1.22225	1	-0.509258	-0.830051	-0.320793	1	0	0	1	1650
NM_023781	1700020D05Rik	chr19_5501787-5505788	TSS10282	0.373105	0.458221	0.25366	1	0.295745	-0.554871	-0.850616	1	0	0	1	400
NM_019935	Ovol1	chr19_5558575-5562576	TSS10283	0.276825	0.510772	0.166591	1	0.881325	-0.729232	-1.61056	2	2	3425	1	2175
NM_178637	Kat5	chr19_5608094-5612095	TSS10284	15.9265	15.5475	17.5347	1	-0.0347444	0.138775	0.17352	1	0	0	1	2175
NM_001164481	Sipa1	chr19_5661707-5665708	TSS10285	6.05865	7.30465	6.17854	5	0.269778	0.0282651	-0.241513	1	0	0	2	1358
NM_144868	Pcnxl3	chr19_5686908-5690909	TSS10286	12.3402	11.6224	9.9415	1	-0.0864505	-0.311802	-0.225352	1	0	0	1	3450
NM_001114595	Ehbp1l1	chr19_5724317-5728318	TSS10287	1.83178	1.8882	2.05722	4	0.0437394	0.16736	0.12362	1	0	0	2	1475
NM_181452	Fam89b	chr19_5727666-5731667	TSS10288	7.47852	7.64556	9.06071	2	0.0318656	0.276838	0.244972	1	0	0	3	3051
NM_020491	Sssca1	chr19_5729721-5733722	TSS10289	28.6839	29.2271	33.7017	1	0.0270646	0.232573	0.205508	1	0	0	2	2204
NM_019645	Pkp1	chr1_137813601-137817602	TSS1029	0.0107013	0.0611484	0.0106587	1	2.40905	-0.00526189	-2.41431	2	2	2849	1	1175
NM_023912	Scyl1	chr19_5769401-5773402	TSS10290	16.2654	15.1211	14.8713	1	-0.105236	-0.129267	-0.0240307	1	0	0	1	1675
NR_002847	Malat1	chr19_5800671-5804672	TSS10291	253.419	220.784	208.883	1	-0.198888	-0.278828	-0.0799402	1	0	0	4	2879
NR_003513	Neat1	chr19_5843478-5847479	TSS10292	79.9421	54.129	45.2795	1	-0.562545	-0.820084	-0.257538	1	0	0	2	3676
NM_026169	Frmd8	chr19_5873208-5877209	TSS10293	19.0493	17.6699	20.4062	1	-0.108438	0.0992645	0.207703	1	0	0	1	1200
NM_198634	Tigd3	chr19_5892107-5896108	TSS10294	4.43125	2.78986	3.24561	1	-0.66733	-0.449105	0.218224	1	0	0	1	1700
NM_011262	Dpf2	chr19_5910866-5914867	TSS10295	28.297	25.7115	31.1872	1	-0.13823	0.1403	0.27853	1	0	0	1	1975
NM_026772	Cdc42ep2	chr19_5922816-5926817	TSS10296	0.714121	1.41702	0.324449	1	0.987619	-1.13576	-2.12337	1	0	0	1	1300
NM_001164057	Pola2	chr19_5962206-5966207	TSS10297	35.1085	32.7788	36.5208	2	-0.0990552	0.0568956	0.155951	1	0	0	1	2175
NM_198650	Slc22a20	chr19_5984143-5988144	TSS10298	0.131883	0.0700458	0.0520034	1	-0.903335	-1.326	-0.422664	1	0	0	1	250
NM_007600	Capn1	chr19_6013247-6017248	TSS10299	3.89367	3.34923	2.93705	1	-0.217241	-0.406642	-0.189401	1	0	0	1	2050
NM_011729	Ercc5	chr1_44202588-44206589	TSS103	9.07532	11.4667	9.9048	1	0.337397	0.126166	-0.211231	1	0	0	1	1575
NM_028872	5730559C18Rik	chr1_138128857-138132858	TSS1030	6.61174	5.34221	5.90316	1	-0.307541	-0.163516	0.144025	1	0	0	1	2568
NM_001110504	Capn1	chr19_6013825-6017826	TSS10300	11.0099	10.7719	12.0106	1	-0.0315257	0.125496	0.157022	1	0	0	1	2050
NM_026246	Mrpl49	chr19_6055751-6059752	TSS10301	28.8635	31.1742	32.2911	1	0.111103	0.161885	0.0507824	1	0	0	1	2775
NM_028454	Tm7sf2	chr19_6065850-6069851	TSS10302	7.1579	9.32218	7.88699	1	0.381084	0.13992	-0.241164	1	0	0	1	1650
NM_001081041	1110014N23Rik	chr19_6075187-6079188	TSS10303	15.126	11.5415	11.7379	3	-0.39017	-0.365829	0.0243415	1	0	0	1	1275
NM_024231	Zfpl1	chr19_6082891-6086892	TSS10304	14.5672	16.7829	15.4388	1	0.204255	0.0838314	-0.120424	1	0	0	1	2650
NM_133678	Sac3d1	chr19_6116586-6120587	TSS10305	7.57033	8.14224	8.20056	1	0.105056	0.115352	0.0102954	1	0	0	1	2125
NM_026912	Snx15	chr19_6126215-6130216	TSS10306	5.44629	4.79762	5.41214	1	-0.182919	-0.00907297	0.173846	1	0	0	1	900
NM_019722	Arl2	chr19_6139137-6143138	TSS10307	36.452	34.2806	35.0738	1	-0.0886031	-0.0556027	0.0330004	1	0	0	1	1575
NM_198168	Ppp2r5b	chr19_6233840-6237841	TSS10308	5.22607	4.60674	4.7593	1	-0.181943	-0.13495	0.0469932	1	0	0	1	1825
NM_001101516	Gpr25	chr1_138155450-138159451	TSS1031	0.0488653	0.172663	0.0780682	1	1.80018	0.665061	-1.13512	2	1	1475	1	1475
NM_019924	Rps6ka4	chr19_6913091-6917092	TSS10310	4.61474	5.24981	3.98887	1	0.185978	-0.21022	-0.396198	2	1	350	1	1650
NM_001081291	Ccdc88b	chr19_6930701-6934702	TSS10311	0.353914	0.417969	0.403386	1	0.239374	0.188264	-0.0511104	1	0	0	1	74
NM_012021	Prdx5	chr19_6982135-6986136	TSS10312	49.8872	42.9568	51.6844	1	-0.215779	0.0510582	0.266837	1	0	0	1	3086
NM_007953	Esrra	chr19_6994298-6998299	TSS10313	10.4086	7.27882	10.6084	1	-0.51594	0.0274284	0.543368	1	0	0	1	2425
NM_001039494	1700019N12Rik	chr19_6997870-7001871	TSS10314	1.23449	1.88148	0.687137	1	0.607551	-0.844316	-1.45187	1	0	0	1	1875
NM_008431	Kcnk4	chr19_7007005-7011006	TSS10315	0.0983326	0.114594	0.178213	1	0.218727	0.851336	0.632609	2	2	1925	1	1425
NM_207220	Gpr137	chr19_7013683-7017684	TSS10316	6.22056	9.66334	6.8079	3	0.635395	0.130145	-0.505249	1	0	0	1	2600
NM_001177362	Gpr137	chr19_7013997-7017998	TSS10317	2.18261	0.673332	3.03722	3	-1.69518	0.476511	2.17169	1	0	0	1	2600
NM_001177361	Gpr137	chr19_7014940-7018941	TSS10318	0.697755	0.571536	0.182316	2	-0.28742	-1.93045	-1.64303	1	0	0	1	2600
NM_008874	Plcb3	chr19_7042242-7046243	TSS10319	19.0893	17.5322	17.2847	1	-0.12275	-0.143261	-0.0205103	1	0	0	2	3093
NM_001081360	Camsap2	chr1_138240681-138244682	TSS1032	6.19451	7.88933	5.73919	1	0.348863	-0.110125	-0.458987	1	0	0	1	1600
NM_008020	Fkbp2	chr19_7052930-7056931	TSS10320	26.1984	23.867	28.4465	2	-0.134456	0.118768	0.253224	1	0	0	1	2150
NM_011697	Vegfb	chr19_7060141-7064142	TSS10321	45.0255	41.5454	39.4808	2	-0.116051	-0.189587	-0.0735357	1	0	0	2	1559
NM_020566	Dnajc4	chr19_7064762-7068763	TSS10322	5.2776	5.29479	5.67879	1	0.00469057	0.105682	0.100992	1	0	0	1	1600
NM_026675	Nudt22	chr19_7068527-7072528	TSS10323	3.46153	3.49966	3.86696	1	0.0158004	0.159746	0.143946	1	0	0	1	1700
NM_016737	Stip1	chr19_7112516-7116517	TSS10325	230.087	220.969	215.98	1	-0.0583352	-0.0912813	-0.0329461	1	0	0	2	2300
NM_201411	Flrt1	chr19_7178219-7182220	TSS10326	0.098694	0.113423	0.139225	1	0.198798	0.492165	0.293367	1	0	0	1	756
NM_134150	Otub1	chr19_7278774-7282775	TSS10327	50.8816	41.6467	53.582	1	-0.288936	0.074603	0.363539	1	0	0	1	2225
NM_007750	Cox8a	chr19_7290106-7294107	TSS10328	345.657	342.235	360.297	1	-0.0143538	0.0598453	0.0741991	1	0	0	1	2200
NM_027643	Naa40	chr19_7313712-7317713	TSS10329	16.7163	18.8241	17.0537	1	0.171316	0.0288275	-0.142488	1	0	0	1	1850
NR_024328	9230116N13Rik	chr1_138310096-138314097	TSS1033	0.233019	0.181239	0.219806	1	-0.360794	-0.0838463	0.276948	1	0	0	3	1800
NM_001080390	Mark2	chr19_7367927-7371928	TSS10330	7.62239	7.54777	6.40837	4	-0.0141911	-0.25025	-0.236059	1	0	0	2	1075
NM_001080388	Mark2	chr19_7414334-7418335	TSS10331	8.08592	7.52505	6.51828	3	-0.103697	-0.310877	-0.20718	1	0	0	1	2541
NM_001167831	AI846148	chr19_7455516-7459517	TSS10332	11.0935	10.263	11.7605	2	-0.112249	0.0842286	0.196477	1	0	0	2	2950
NM_001003933	Rtn3	chr19_7555779-7559780	TSS10333	52.3051	45.298	50.6447	3	-0.207503	-0.0465407	0.160962	1	0	0	1	1750
NM_019516	Lgals12	chr19_7679666-7683667	TSS10334	0.0705002	0.151162	0.0694041	1	1.08959	-0.0222878	-1.11188	1	0	0	2	825
NM_001159769	Nr5a2	chr1_138848207-138852208	TSS1034	6.51613	6.72502	5.21439	1	0.0455163	-0.321462	-0.366978	1	0	0	1	2818
NM_008577	Slc3a2	chr19_8786387-8790388	TSS10341	91.6438	97.3825	119.399	1	0.0876243	0.381678	0.294054	1	0	0	2	2988
NM_001161413	Slc3a2	chr19_8795859-8799860	TSS10342	1.01291	1.36746	2.09009	1	0.432624	1.04433	0.611702	1	0	0	4	2610
NM_026325	Tmem179b	chr19_8846957-8850958	TSS10343	7.60385	12.8156	10.1849	3	0.753022	0.421582	-0.33144	1	0	0	2	1875
NM_001177798	Taf6l	chr19_8858907-8862908	TSS10344	0.512269	0.300792	0.761693	9	-0.766159	0.571386	1.33755	1	0	0	2	1400
NM_146092	Taf6l	chr19_8858806-8862807	TSS10345	7.08744	7.4897	7.81302	1	0.0796324	0.140597	0.0609644	1	0	0	2	1400
NM_026329	Polr2g	chr19_8871047-8875048	TSS10346	69.0569	74.1365	96.9508	1	0.102397	0.489461	0.387064	1	0	0	1	1075
NM_027412	Ttc9c	chr19_8891784-8895785	TSS10347	20.2201	25.0956	24.022	1	0.31163	0.248555	-0.0630756	1	0	0	2	3235
NM_010316	Gng3	chr19_8911736-8915737	TSS10348	3.67654	4.10771	6.887	1	0.159944	0.905344	0.7454	1	0	0	1	4001
NM_001160356	AI462493	chr19_8953423-8957424	TSS10349	15.6671	13.8102	19.0211	1	-0.181992	0.279846	0.461838	1	0	0	2	1000
NM_030676	Nr5a2	chr1_138855025-138859026	TSS1035	0	0	0	1	0	0	0	1	0	0	1	525
NR_027866	5730408K05Rik	chr19_8961260-8965261	TSS10350	20.288	15.5874	24.953	1	-0.380225	0.298573	0.678798	1	0	0	1	2850
NM_009073	Rom1	chr19_9001846-9005847	TSS10351	0.942469	0.759682	0.914414	1	-0.310682	-0.0435508	0.267131	1	0	0	1	2075
NM_025610	Asrgl1	chr19_9208056-9212057	TSS10353	13.2553	13.1303	11.3831	1	-0.0136684	-0.219658	-0.20599	1	0	0	1	1125
NM_016692	Incenp	chr19_9972023-9976024	TSS10354	51.4449	47.5344	48.3379	1	-0.114054	-0.0898715	0.0241823	1	0	0	1	2250
NM_019699	Fads2	chr19_10173993-10177994	TSS10356	21.2451	33.7407	30.9819	1	0.667335	0.544274	-0.12306	1	0	0	1	2450
NM_007999	Fen1	chr19_10276433-10280434	TSS10357	32.0268	30.8765	37.4575	1	-0.0527688	0.225968	0.278737	1	0	0	1	2175
NM_001033481	Gm98	chr19_10313238-10317239	TSS10358	12.4573	9.86193	9.1356	1	-0.337019	-0.447378	-0.110359	1	0	0	1	2087
NM_198114	Dagla	chr19_10377367-10381368	TSS10359	0.651405	0.684047	0.714016	1	0.0704351	0.132208	0.0617726	1	0	0	1	1125
NM_001111140	Lrrc10b	chr19_10529937-10533938	TSS10360	0.164213	0.120669	0.176321	1	-0.441366	0.102036	0.543402	2	2	2613	1	1800
NM_025333	Sdhaf2	chr19_10597699-10601700	TSS10362	6.01775	6.19575	6.37821	1	0.0420479	0.0839139	0.041866	1	0	0	1	1475
NM_026798	Tmem216	chr19_10628728-10632729	TSS10363	3.36836	4.86372	3.09722	1	0.529882	-0.121035	-0.650917	1	0	0	1	1350
NM_028411	Tmem138	chr19_10649587-10653588	TSS10364	10.6827	8.28834	8.37476	1	-0.366082	-0.351119	0.0149629	1	0	0	1	1700
NM_145496	Dak	chr19_10676748-10680749	TSS10365	13.6878	10.4133	11.1076	1	-0.39443	-0.301319	0.0931111	1	0	0	3	2924
NM_021453	Pga5	chr19_10750561-10754562	TSS10366	3.14707	9.2165	3.45886	1	1.54991	0.136246	-1.41366	1	0	0	2	225
NM_007650	Cd5	chr19_10811464-10815465	TSS10367	0	0	0	1	0	0	0	1	0	0	1	190
NM_133804	Tmem132a	chr19_10942269-10946270	TSS10369	14.5243	11.032	13.2021	1	-0.396743	-0.137691	0.259052	1	0	0	1	1775
NM_021605	Nek7	chr1_140514273-140518274	TSS1037	10.8535	14.4055	11.7716	1	0.408427	0.11714	-0.291287	1	0	0	2	1952
NM_134142	Tmem109	chr19_10954233-10958234	TSS10370	5.71807	5.99764	6.09035	1	0.0688549	0.0909814	0.0221265	1	0	0	3	1625
NM_023731	Ccdc86	chr19_11021756-11025757	TSS10372	11.1342	9.2411	13.0552	1	-0.268835	0.229608	0.498442	1	0	0	1	2494
NM_023529	Ms4a10	chr19_11047160-11051161	TSS10373	0	0.0949553	0.433187	1	6.58429	8.76217	2.17788	1	0	0	1	275
NM_198224	Ms4a13	chr19_11269213-11273214	TSS10379	0	0	0	1	0	0	0	0	0	0	0	0
NM_001025565	Lhx9	chr1_140737021-140741022	TSS1038	0.3726	0.110532	0.0895811	2	-1.74404	-2.04421	-0.300172	2	3	3501	2	1500
NM_011502	Stx3	chr19_11891383-11895384	TSS10388	6.1757	5.83496	5.20022	1	-0.0818663	-0.247986	-0.16612	1	0	0	1	3317
NM_152220	Stx3	chr19_11891893-11895894	TSS10389	37.3971	37.7652	29.6758	4	0.0141312	-0.333629	-0.34776	1	0	0	1	2807
NM_010714	Lhx9	chr1_140742156-140746157	TSS1039	0	0.0286799	7.54311e-05	1	4.89141	0.104915	-4.7865	2	2	3651	2	1875
NM_001011775	Olfr1419	chr19_11943704-11947705	TSS10392	0	0	0	1	0	0	0	1	0	0	1	71
NM_028450	Gulp1	chr1_44606515-44610516	TSS104	1.50544	0.981035	2.09565	1	-0.617297	0.476943	1.09424	1	0	0	1	1250
NM_001081226	2310009B15Rik	chr1_140751431-140755432	TSS1040	1.79228	1.75306	2.35039	1	-0.0319027	0.390913	0.422816	1	0	0	1	275
NM_172442	Dtx4	chr19_12574486-12578487	TSS10403	2.82531	2.35696	2.69489	1	-0.26138	-0.0681581	0.193222	1	0	0	1	1425
NR_015503	A330040F15Rik	chr19_12669056-12673057	TSS10404	0.0445463	0.0819762	0	1	0.865364	-5.50926	-6.37463	2	2	300	1	1125
NM_053009	Zfp91	chr19_12868613-12872614	TSS10406	16.6909	15.561	14.7588	2	-0.101116	-0.177479	-0.0763625	1	0	0	1	2450
NM_011600	Tle4	chr19_14670473-14674474	TSS10421	18.1103	20.7006	23.93	1	0.192852	0.401991	0.209138	1	0	0	2	3125
NM_177420	Psat1	chr19_15997549-16001550	TSS10422	100.544	97.3747	118.531	1	-0.0462076	0.237435	0.283643	1	0	0	1	2726
NM_198019	Cep78	chr19_16057479-16061480	TSS10423	14.965	14.0519	15.6993	1	-0.0908208	0.0691034	0.159924	1	0	0	1	1600
NM_173028	Vps13a	chr19_16853423-16857424	TSS10424	4.24176	5.9117	4.30139	1	0.478814	0.0201352	-0.458679	1	0	0	1	1675
NM_008023	Foxb2	chr19_16946320-16950321	TSS10425	0	0.0423012	0	1	5.43634	0	-5.43634	2	2	3676	2	2225
NM_173442	Gcnt1	chr19_17429157-17433158	TSS10427	1.04686	3.37834	3.02566	1	1.6893	1.53028	-0.159015	1	0	0	1	1175
NM_001190483	Pcsk5	chr19_17910122-17914123	TSS10429	0.227557	0.210561	0.185062	2	-0.11148	-0.296771	-0.185291	2	1	1378	1	2075
NM_017375	Ostf1	chr19_18704303-18708304	TSS10430	46.3572	38.9039	42.8067	1	-0.252873	-0.114954	0.137918	1	0	0	1	1250
NM_001043354	Rorb	chr19_19183686-19187687	TSS10432	0	0	0	1	0	0	0	2	2	650	1	1700
NM_010266	Gda	chr19_21545151-21549152	TSS10436	0.0565143	0.0496563	0.137808	1	-0.183179	1.2711	1.45428	2	1	25	1	700
NM_025423	1110059E24Rik	chr19_21725281-21729282	TSS10437	17.2928	17.7316	18.3197	1	0.0361492	0.0832197	0.0470705	1	0	0	1	1925
NM_153808	Smc5	chr19_23346387-23350388	TSS10438	24.1274	31.1494	19.325	1	0.368518	-0.320189	-0.688708	1	0	0	1	725
NM_174857	Mamdc2	chr19_23520812-23524813	TSS10439	0.0321645	0.0795027	0.0323881	1	1.2794	0.00969422	-1.2697	1	0	0	1	1150
NM_026188	1700028P14Rik	chr19_23725302-23729303	TSS10440	0	0	0	1	0	0	0	1	0	0	1	275
NM_001114174	Fam189a2	chr19_24103509-24107510	TSS10441	1.97657	1.95134	1.18093	1	-0.0185244	-0.742584	-0.72406	2	2	1550	1	1325
NM_011597	Tjp2	chr19_24297516-24301517	TSS10442	42.5788	39.3622	46.2475	1	-0.113322	0.119237	0.232559	1	0	0	3	2559
NM_008044	Fxn	chr19_24353076-24357077	TSS10443	8.20237	9.94862	13.8045	1	0.278425	0.750955	0.47253	1	0	0	1	2100
NM_008846	Pip5k1b	chr19_24628317-24632318	TSS10444	1.7683	1.55355	1.07983	1	-0.186682	-0.711039	-0.524357	1	0	0	1	1950
NM_026520	Fam122a	chr19_24549964-24553965	TSS10445	4.37545	3.30131	4.01165	1	-0.406286	-0.125206	0.28108	1	0	0	1	1675
NM_175013	Pgm5	chr19_24934332-24938333	TSS10446	0.0785948	0.0957147	0.106871	1	0.281061	0.438561	0.1575	2	1	50	1	800
NM_008022	Foxd4	chr19_24973799-24977800	TSS10447	0.314432	0.140573	0.158763	1	-1.15578	-0.981396	0.174387	2	1	2551	1	1826
NR_033744	Cbwd1	chr19_25034106-25038107	TSS10448	14.0659	16.7953	14.6081	2	0.255845	0.0545696	-0.201275	1	0	0	1	925
NM_177474	D19Bwg1357e	chr19_27502310-27506311	TSS10450	49.9329	51.0144	52.6838	1	0.0309132	0.0773672	0.046454	1	0	0	1	2550
NM_011265	Rfx3	chr19_28083656-28087657	TSS10452	1.83539	2.27962	1.98185	1	0.312554	0.110703	-0.201851	1	0	0	1	2650
NM_175459	Glis3	chr19_28752567-28756568	TSS10453	0.525956	0.430011	0.124802	1	-0.289958	-2.06653	-1.77657	2	1	1325	1	2358
NM_198651	4430402I18Rik	chr19_29036644-29040645	TSS10455	0.0850629	0	0	1	-6.42732	-6.42732	0	1	0	0	1	1250
NM_021299	Ak3	chr19_29120392-29124393	TSS10457	7.20395	11.4239	8.60995	1	0.665121	0.257184	-0.407937	1	0	0	1	1125
NM_013754	Insl6	chr19_29397808-29401809	TSS10458	1.82111	0.866839	1.30629	1	-1.07011	-0.479031	0.59108	1	0	0	1	300
NM_011272	Rln1	chr19_29407160-29411161	TSS10459	1.37268	0.63288	2.10123	1	-1.11576	0.613875	1.72964	1	0	0	1	650
NM_145991	Cdc73	chr1_145547814-145551815	TSS1046	29.4459	31.2321	30.6837	1	0.08496	0.0594037	-0.0255563	1	0	0	1	1900
NM_026362	5033414D02Rik	chr19_29434361-29438362	TSS10460	6.40171	6.27521	6.02588	1	-0.028789	-0.0872713	-0.0584823	1	0	0	1	700
NR_015567	A930007I19Rik	chr19_29594477-29598478	TSS10461	0.277468	0.309074	0.0300242	1	0.155101	-3.16605	-3.32115	1	0	0	1	1950
NM_001081213	Ermp1	chr19_29720910-29724911	TSS10462	18.5873	19.288	16.7786	1	0.0533835	-0.147687	-0.20107	1	0	0	1	1125
NM_172836	9930021J03Rik	chr19_29878499-29882500	TSS10463	5.66519	6.67972	5.38818	1	0.237625	-0.0723132	-0.309938	1	0	0	1	1975
NM_177721	Ranbp6	chr19_29885464-29889465	TSS10464	2.38711	2.12582	2.60974	1	-0.167171	0.128589	0.295761	1	0	0	1	1025
NM_138595	Gldc	chr19_30247908-30251909	TSS10465	69.5059	64.1458	57.9991	1	-0.115779	-0.261101	-0.145322	1	0	0	2	1900
NR_003650	Ppp1r2-ps3	chr19_30612169-30616170	TSS10466	6.52831	8.6002	7.78729	1	0.397607	0.254376	-0.143231	1	0	0	1	225
NM_010051	Dkk1	chr19_30621986-30625987	TSS10467	3.61826	7.03415	3.47615	1	0.958886	-0.0577894	-1.01668	2	2	525	1	1225
NM_011160	Prkg1	chr19_31736860-31740861	TSS10468	0	0	0	3	0	0	0	2	2	875	1	1650
NM_001013833	Prkg1	chr19_31837523-31841524	TSS10469	0.186735	0.244316	0.112248	1	0.385944	-0.729212	-1.11516	2	2	825	2	1977
NM_013835	Trove2	chr1_145622181-145626182	TSS1047	6.90848	7.84941	7.98428	1	0.184191	0.208766	0.024575	1	0	0	1	1850
NM_001168526	Sgms1	chr19_32283503-32287504	TSS10473	6.01494	6.64932	6.1099	1	0.144634	0.0225947	-0.122039	1	0	0	2	1525
NM_144792	Sgms1	chr19_32460944-32464945	TSS10475	3.73725	2.57321	2.41238	1	-0.538233	-0.631308	-0.0930747	1	0	0	1	3245
NM_026487	Atad1	chr19_32784788-32788789	TSS10476	60.2166	68.6664	66.51	1	0.18944	0.143408	-0.0460324	1	0	0	2	1475
NM_001146342	Rnls	chr19_33464785-33468786	TSS10477	0.305935	0.565181	0.91094	2	0.883329	1.57101	0.687676	1	0	0	1	875
NM_001013770	Lipo1	chr19_33662801-33666802	TSS10478	1.65446	1.55199	1.57713	1	-0.0921836	-0.0690161	0.0231675	1	0	0	1	450
NM_009061	Rgs2	chr1_145849279-145853280	TSS1048	1.21429	0.611604	1.78544	1	-0.988274	0.555787	1.54406	1	0	0	1	1200
NM_009890	Ch25h	chr19_34547625-34551626	TSS10481	0	0	0.0500068	1	0	5.67262	5.67262	2	1	200	1	1700
NM_001111100	Lipa	chr19_34599964-34603965	TSS10482	5.17306	5.79124	4.99098	2	0.162825	-0.0516854	-0.214511	1	0	0	1	775
NM_172838	Slc16a12	chr19_34819601-34823602	TSS10486	0.0534191	0	0.0178489	1	-5.76604	-1.52963	4.23641	2	2	1475	1	975
NM_023792	Pank1	chr19_34950407-34954408	TSS10487	1.07645	1.67742	2.32614	1	0.639483	1.11094	0.471454	1	0	0	1	1900
NM_001114339	Pank1	chr19_34951945-34955946	TSS10488	2.12295	2.07947	2.44774	1	-0.0298403	0.20529	0.23513	1	0	0	1	1900
NM_008315	Htr7	chr19_36129850-36133851	TSS10490	0.0159802	0	0.0324492	1	-4.08578	0.978118	5.0639	2	2	800	1	1325
NM_016854	Ppp1r3c	chr19_36809094-36813095	TSS10493	1.17368	0.787136	0.690564	1	-0.575751	-0.764333	-0.188582	1	0	0	1	850
NM_028263	Fgfbp3	chr19_36992089-36996090	TSS10494	1.48488	1.38555	1.86596	1	-0.099818	0.329373	0.429191	1	0	0	2	1300
NM_198300	Cpeb3	chr19_37279783-37283784	TSS10495	0.804191	0.836587	0.813989	1	0.056908	0.0174495	-0.0394585	1	0	0	1	2275
NM_001099634	Myof	chr19_38116067-38120068	TSS10497	3.7204	3.56364	2.86919	1	-0.0620891	-0.374699	-0.31261	1	0	0	1	1475
NM_011255	Rbp4	chr19_38197301-38201302	TSS10498	3.05415	14.5477	1.57063	1	2.25158	-0.958982	-3.21056	2	2	925	1	1250
NM_001159487	Rbp4	chr19_38197811-38201812	TSS10499	0.101385	0.158162	0	1	0.636492	-6.67786	-7.31435	2	2	925	1	1250
NM_001081075	5730455O13Rik	chr19_38296622-38300623	TSS10500	18.0582	16.42	14.5345	1	-0.137192	-0.313153	-0.175961	1	0	0	1	1650
NM_021315	Noc3l	chr19_38891727-38895728	TSS10501	12.2638	12.4697	13.4483	1	0.0240187	0.133007	0.108989	1	0	0	2	1675
NM_016861	Pdlim1	chr19_40344106-40348107	TSS10509	45.2238	53.41	45.5769	1	0.240023	0.0112203	-0.228802	1	0	0	1	1950
NM_178362	Sorbs1	chr19_40586226-40590227	TSS10512	4.48601	4.55494	3.80922	10	0.0219956	-0.23588	-0.257876	1	0	0	2	2325
NM_019698	Aldh18a1	chr19_40660953-40664954	TSS10513	19.1918	19.4089	21.8434	2	0.0162208	0.186693	0.170473	1	0	0	2	2375
NM_026260	Tctn3	chr19_40684705-40688706	TSS10514	1.88853	1.9504	1.90491	1	0.0464821	0.0124526	-0.0340295	1	0	0	1	875
NM_011904	Tll2	chr19_41279264-41283265	TSS10517	0.0246832	0	0.0247585	1	-4.68275	0.00422362	4.68698	1	0	0	1	1350
NM_133352	Tm9sf3	chr19_41336494-41340495	TSS10518	36.6556	43.1866	38.6157	1	0.236544	0.0751519	-0.161392	1	0	0	1	1750
NM_031376	Pik3ap1	chr19_41457560-41461561	TSS10519	0.56926	1.42463	0.485073	1	1.32191	-0.230447	-1.55235	2	1	1125	1	825
NM_008869	Pla2g4a	chr1_151806414-151810415	TSS1052	0.877951	0.349097	1.29305	1	-1.32803	0.558039	1.88607	1	0	0	1	250
NM_015748	Slit1	chr19_41816346-41820347	TSS10520	0.171687	0.0882743	0.0858571	1	-0.951843	-0.991444	-0.0396011	2	2	2225	1	1025
NM_027667	Arhgap19	chr19_41874574-41878575	TSS10521	28.6666	32.9228	28.0646	2	0.199709	-0.0306208	-0.23033	1	0	0	2	1250
NM_177603	Frat2	chr19_41920622-41924623	TSS10522	12.0361	8.1193	8.85068	1	-0.567883	-0.443465	0.124418	1	0	0	1	2300
NM_199447	Rrp12	chr19_41968643-41972644	TSS10523	20.4975	19.8487	22.3007	1	-0.0464011	0.121635	0.168036	1	0	0	1	1575
NM_001164561	Exosc1	chr19_42005804-42009805	TSS10524	25.0473	20.9551	25.0544	2	-0.257342	0.00041072	0.257753	1	0	0	1	2100
NM_028152	Mms19	chr19_42053626-42057627	TSS10525	16.6254	16.3174	16.1194	1	-0.0269762	-0.0445883	-0.0176121	1	0	0	1	2450
NM_198108	Morn4	chr19_42158860-42162861	TSS10526	9.74644	7.07091	8.23626	1	-0.462923	-0.242859	0.220065	1	0	0	1	775
NM_027106	Avpi1	chr19_42201483-42205484	TSS10527	28.7303	26.0775	28.5507	1	-0.139762	-0.00904662	0.130716	1	0	0	4	2567
NM_018780	Sfrp5	chr19_42274742-42278743	TSS10528	0.248995	0.838748	0.307817	1	1.74806	0.304853	-1.4432	2	3	2225	1	1250
NM_145123	Crtac1	chr19_42504273-42508274	TSS10529	3.23035	1.35738	0.905511	1	-1.25025	-1.83374	-0.583491	2	4	675	1	2000
NR_015466	7530420F21Rik	chr1_151944896-151948897	TSS1053	0	0	0	1	0	0	0	1	0	0	1	975
NM_001164311	Loxl4	chr19_42685296-42689297	TSS10530	0.103343	0.107043	0.113346	2	0.0502814	0.132077	0.0817954	2	1	125	1	900
NM_029011	Pyroxd2	chr19_42825265-42829266	TSS10531	0.154545	0.354994	0.206132	1	1.19452	0.413218	-0.781302	1	0	0	1	850
NM_019424	Hps1	chr19_42852466-42856467	TSS10532	7.77755	7.10547	6.63119	1	-0.130368	-0.230016	-0.0996478	1	0	0	2	1600
NM_001081257	Hpse2	chr19_43460845-43464846	TSS10533	0.0248692	0	0	1	-4.69316	-4.69316	0	2	1	2030	1	505
NM_010324	Got1	chr19_43597095-43601096	TSS10534	62.1389	61.3997	65.1367	1	-0.0172648	0.0679729	0.0852377	1	0	0	1	1925
NM_145156	Slc25a28	chr19_43747371-43751372	TSS10535	17.3396	14.8848	16.5076	1	-0.220217	-0.070936	0.149281	1	0	0	1	2925
NM_144874	Cox15	chr19_43825490-43829491	TSS10536	10.2718	12.048	11.768	1	0.230084	0.196162	-0.0339217	1	0	0	2	1250
NM_030703	Cpn1	chr19_44059010-44063011	TSS10538	1.04055	1.15069	1.69679	1	0.14502	0.704926	0.559906	1	0	0	1	675
NM_001077237	BC003331	chr1_152238185-152242186	TSS1054	7.65161	8.21992	5.52937	2	0.103348	-0.468575	-0.571923	1	0	0	2	2200
NM_145502	Erlin1	chr19_44142176-44146177	TSS10540	10.1141	9.74776	7.26503	3	-0.053222	-0.477273	-0.424051	1	0	0	1	1275
NM_001162410	Chuk	chr19_44179967-44183968	TSS10541	14.2331	18.7417	16.3166	2	0.396981	0.197078	-0.199903	1	0	0	1	1750
NM_001081077	Cwf19l1	chr19_44208366-44212367	TSS10542	6.14689	6.88985	7.64573	1	0.164591	0.314752	0.150161	1	0	0	1	975
NM_028607	Bloc1s2	chr19_44218936-44222937	TSS10543	31.9644	32.9486	40.106	1	0.0437498	0.327343	0.283593	1	0	0	1	1525
NM_009127	Scd1	chr19_44480199-44484200	TSS10545	11.4437	27.4799	18.7699	1	1.26375	0.713818	-0.549931	1	0	0	1	2725
NM_001033343	Sec31b	chr19_44618338-44622339	TSS10546	0.711932	0.616827	0.425651	1	-0.206562	-0.740708	-0.534146	1	0	0	1	900
NM_026061	Ndufb8	chr19_44627905-44631906	TSS10547	83.4941	77.1551	87.4157	1	-0.113911	0.0662174	0.180129	1	0	0	1	1400
NM_053164	Mrpl43	chr19_45078932-45082933	TSS10548	29.7837	28.8498	36.4009	1	-0.0459601	0.289442	0.335402	1	0	0	1	2800
NM_001195265	Pdzd7	chr19_45118262-45122263	TSS10549	0.439626	0.201131	0.577711	1	-1.12426	0.393288	1.51755	1	0	0	1	1463
NM_010691	Lbx1	chr19_45307726-45311727	TSS10550	0	0	0	1	0	0	0	2	2	3726	3	2650
NM_020032	Poll	chr19_45633033-45637034	TSS10551	5.75497	4.98292	6.04162	1	-0.207778	0.0701151	0.277893	1	0	0	1	1500
NM_013907	Fbxw4	chr19_45732683-45736684	TSS10552	8.0318	7.29132	7.45118	1	-0.139525	-0.10824	0.0312847	2	1	100	1	1525
NM_001166361	Fgf8	chr19_45815374-45819375	TSS10553	1.22943	1.00587	0.947644	4	-0.289278	-0.375224	-0.0859455	2	2	3601	1	2325
NM_008723	Npm3	chr19_45822053-45826054	TSS10554	66.0854	42.0007	62.732	1	-0.653906	-0.0751289	0.578777	1	0	0	1	1700
NM_023799	Mgea5	chr19_45855781-45859782	TSS10555	56.2458	53.6296	46.9879	1	-0.0687146	-0.259451	-0.190736	1	0	0	2	2644
NM_145704	Kcnip2	chr19_45888293-45892294	TSS10556	2.75291	2.61014	2.07258	3	-0.0768044	-0.409358	-0.332553	1	0	0	2	1769
NM_198296	9130011E15Rik	chr19_46070978-46074979	TSS10557	6.14905	5.9155	6.86542	1	-0.0558542	0.15896	0.214814	1	0	0	1	1425
NM_010697	Ldb1	chr19_46112111-46116112	TSS10559	19.086	8.96723	12.1486	1	-1.0897	-0.651682	0.438014	1	0	0	2	3401
NM_001024720	Hmcn1	chr1_152838565-152842566	TSS1056	0.0914749	0.10175	0.16168	1	0.152005	0.814903	0.662899	1	0	0	1	1100
NM_001113408	Ldb1	chr19_46117701-46121702	TSS10560	39.5839	36.1864	34.699	1	-0.129463	-0.190015	-0.0605518	1	0	0	1	3824
NM_008852	Pitx3	chr19_46220815-46224816	TSS10561	0.054389	0.0536973	0	1	-0.0181299	-5.79153	-5.7734	2	2	2475	1	1650
NM_028627	Psd	chr19_46399646-46403647	TSS10562	0.604897	0.855264	0.780002	1	0.498983	0.366254	-0.132729	1	0	0	1	2647
NM_001164292	Cuedc2	chr19_46411150-46415151	TSS10563	55.5518	40.1172	51.6588	10	-0.4696	-0.104817	0.364784	1	0	0	1	1425
NM_016860	Actr1a	chr19_46468225-46472226	TSS10564	27.2672	30.784	31.3165	1	0.175008	0.19975	0.0247415	1	0	0	3	2551
NM_019718	Arl3	chr19_46645575-46649576	TSS10565	46.1923	32.7888	39.8621	1	-0.494437	-0.21263	0.281807	1	0	0	2	1975
NM_029810	Nt5c2	chr19_47034841-47038842	TSS10567	9.83225	7.41654	6.98008	3	-0.406728	-0.494218	-0.0874906	1	0	0	1	1725
NR_028353	Nt5c2	chr19_47034841-47038842	TSS10568	0	0	0	1	0	0	0	1	0	0	1	1725
NM_001164363	Nt5c2	chr19_47087679-47091680	TSS10569	1.34557	2.16845	3.09527	1	0.68804	1.20124	0.513202	2	1	225	1	3425
NM_025819	1200016B10Rik	chr1_153273565-153277566	TSS1057	13.88	12.1668	8.89289	1	-0.190043	-0.642225	-0.452182	1	0	0	1	1475
NM_027654	Pcgf6	chr19_47123335-47127336	TSS10570	29.3499	28.9485	29.065	1	-0.0198663	-0.0140722	0.00579411	1	0	0	1	1950
NM_023211	Usmg5	chr19_47163115-47167116	TSS10571	106.925	97.2093	122.806	1	-0.137432	0.19978	0.337212	1	0	0	1	1800
NM_133746	Calhm2	chr19_47210784-47214785	TSS10572	0.595277	0.451426	0.476363	1	-0.398301	-0.320896	0.0774049	1	0	0	2	1925
NM_001081271	Calhm1	chr19_47216664-47220665	TSS10573	0	0	0	1	0	0	0	1	0	0	1	250
NM_008018	Sh3pxd2a	chr19_47536901-47540902	TSS10574	5.13396	4.17302	4.09204	2	-0.298916	-0.32718	-0.0282647	1	0	0	1	1950
NM_175360	Obfc1	chr19_47609510-47613511	TSS10575	10.5499	8.84078	10.0564	1	-0.254957	-0.0691087	0.185849	1	0	0	1	1650
NM_027559	Wdr96	chr19_47909851-47913852	TSS10577	0.483246	0.841605	0.467174	1	0.799116	-0.0486953	-0.847812	1	0	0	1	1100
NM_001001738	Itprip	chr19_47991789-47995790	TSS10578	0.942886	0.800998	0.800203	1	-0.235014	-0.236445	-0.00143082	1	0	0	1	1325
NM_021377	Sorcs1	chr19_50751136-50755137	TSS10579	0.0975936	0.110105	0.091577	1	0.172358	-0.0908402	-0.263198	2	3	639	1	1425
NM_011277	Rnf2	chr1_153345953-153349954	TSS1058	34.7803	34.998	33.5074	1	0.00900185	-0.0537891	-0.0627909	1	0	0	1	1575
NM_133216	Xpnpep1	chr19_53111032-53115033	TSS10580	56.7131	61.4997	63.6669	1	0.116895	0.166859	0.0499633	1	0	0	1	2300
NM_172429	Smndc1	chr19_53463063-53467064	TSS10582	30.397	38.0734	36.3709	1	0.324845	0.258848	-0.065997	1	0	0	2	2600
NM_001195348	Bbip1	chr19_54017117-54021118	TSS10584	6.82223	6.38229	6.2012	2	-0.0961538	-0.137675	-0.041521	1	0	0	1	2550
NM_008149	Gpam	chr19_55171937-55175938	TSS10585	3.5837	3.95246	3.86453	1	0.141263	0.108814	-0.0324496	1	0	0	1	1750
NM_001033573	Zdhhc6	chr19_55388522-55392523	TSS10587	19.6346	23.9647	21.326	2	0.287502	0.119213	-0.168289	1	0	0	1	1600
NM_018831	Dclre1a	chr19_56620712-56624713	TSS10589	3.56159	4.1197	3.05449	1	0.209963	-0.221523	-0.431486	1	0	0	1	2125
NM_197990	1700025G04Rik	chr1_153935450-153939451	TSS1059	1.82432	2.09006	1.49337	1	0.196085	-0.288612	-0.484697	1	0	0	1	2500
NM_001177796	Afap1l2	chr19_57081065-57085066	TSS10591	0.715836	0.611948	0.57109	3	-0.225879	-0.325401	-0.0995219	2	1	75	1	1150
NM_001103178	Ablim1	chr19_57191499-57195500	TSS10592	2.40424e-05	0	0	1	-0.0342755	-0.0342755	0	1	0	0	2	750
NM_001103177	Ablim1	chr19_57269982-57273983	TSS10593	0.306224	0.748253	0.321534	1	1.28616	0.0701603	-1.216	1	0	0	1	975
NM_010279	Gfra1	chr19_58526956-58530957	TSS10595	0.106095	0.14163	0.135802	1	0.413386	0.353198	-0.0601881	2	3	3100	1	3050
NM_026208	1700019N19Rik	chr19_58866904-58870905	TSS10596	0	0	0.101296	1	0	6.67661	6.67661	1	0	0	1	250
NM_175199	Hspa12a	chr19_58933474-58937475	TSS10597	3.07764	1.86574	1.92297	1	-0.721772	-0.678207	0.0435653	1	0	0	1	1975
NM_001114312	4930506M07Rik	chr19_59148559-59152560	TSS10598	2.01928	3.17559	1.38127	2	0.652924	-0.547516	-1.20044	2	2	775	1	1200
NM_009501	Vax1	chr19_59242519-59246520	TSS10599	0.0923106	0.210769	0.167066	1	1.18238	0.848915	-0.333464	2	2	3751	2	2220
NM_028599	Wdr75	chr1_45850345-45854346	TSS106	50.8223	58.472	59.0185	1	0.202281	0.215702	0.0134211	1	0	0	2	1800
NM_025677	Tsen15	chr1_154231812-154235813	TSS1060	12.1719	11.3625	19.0486	1	-0.0992656	0.646088	0.745353	1	0	0	1	700
NM_001033222	Pdzd8	chr19_59418270-59422271	TSS10600	8.26555	9.62315	8.789	1	0.219374	0.0885778	-0.130796	1	0	0	1	2525
NR_002863	Emx2os	chr19_59531125-59535126	TSS10601	0.228171	0.179422	0.136374	1	-0.345049	-0.738316	-0.393266	2	2	3375	1	2100
NM_001033172	Rab11fip2	chr19_60017267-60021268	TSS10602	4.78674	3.29536	3.51822	2	-0.538471	-0.444089	0.0943819	1	0	0	1	1325
NM_001164367	Rab11fip2	chr19_60017557-60021558	TSS10603	0.685512	1.04482	0.76171	2	0.607278	0.15185	-0.455428	1	0	0	1	1325
NM_029648	D19Ertd737e	chr19_60300600-60304601	TSS10604	11.4152	11.5324	11.0962	1	0.0147354	-0.0408868	-0.0556222	1	0	0	1	650
NM_201615	Prlhr	chr19_60542207-60546208	TSS10605	0	0	0	1	0	0	0	2	1	1150	1	1100
NM_001172097	2700078E11Rik	chr19_60654926-60658927	TSS10606	18.5612	20.8328	21.5428	3	0.166555	0.214902	0.0483468	1	0	0	1	2000
NM_010123	Eif3a	chr19_60864596-60868597	TSS10607	262.807	267.144	232.72	1	0.0236138	-0.175408	-0.199022	1	0	0	2	2279
NM_053198	Sfxn4	chr19_60935333-60939334	TSS10609	2.69342	2.5825	2.24735	1	-0.0606479	-0.261108	-0.20046	1	0	0	1	725
NM_016846	Rgl1	chr1_154470241-154474242	TSS1061	1.92134	2.84697	1.90807	1	0.56707	-0.00999352	-0.577064	2	1	1000	1	1150
NM_007452	Prdx3	chr19_60948441-60952442	TSS10610	23.2564	27.257	30.0732	1	0.22899	0.370837	0.141847	1	0	0	1	1150
NM_001177513	Gm7102	chr19_61250212-61254213	TSS10611	6.72289	6.26723	5.93149	1	-0.101238	-0.180658	-0.0794204	1	0	0	1	450
NM_009970	Csf2ra	chr19_61302321-61306322	TSS10612	10.1407	7.0487	7.81321	1	-0.524666	-0.376128	0.148538	1	0	0	1	2379
NM_001160256	Smg7	chr1_154747776-154751777	TSS1062	13.8333	11.292	11.27	3	-0.292824	-0.29563	-0.00280598	1	0	0	1	2675
NM_001081161	Fam171a1	chr2_3033659-3037660	TSS10620	1.61178	1.93854	2.04413	1	0.266165	0.342643	0.076478	1	0	0	1	1250
NM_008708	Nmt2	chr2_3199559-3203560	TSS10621	36.5631	39.0858	32.5768	1	0.0962536	-0.166539	-0.262792	1	0	0	2	2225
NM_030063	Acbd7	chr2_3251439-3255440	TSS10622	0.314918	0.618293	0.48924	1	0.971072	0.633938	-0.337134	1	0	0	1	925
NM_001110214	Dclre1c	chr2_3339402-3343403	TSS10623	7.10276	7.8632	6.86428	3	0.146717	-0.0492647	-0.195981	1	0	0	1	900
NM_177647	Cdnf	chr2_3428336-3432337	TSS10624	0.664383	0.496418	0.439527	1	-0.419726	-0.594955	-0.175228	1	0	0	1	1450
NM_025626	Fam107b	chr2_3628729-3632730	TSS10625	8.03452	7.89431	10.1346	1	-0.0253955	0.334968	0.360364	1	0	0	1	975
NM_172475	Frmd4a	chr2_4071908-4075909	TSS10626	1.39999	1.57405	0.794753	1	0.168951	-0.816054	-0.985005	1	0	0	1	625
NM_001177843	Frmd4a	chr2_4320021-4324022	TSS10627	1.66439	1.54836	1.51116	2	-0.104189	-0.139255	-0.0350654	1	0	0	1	1700
NM_001177844	Frmd4a	chr2_4478799-4482800	TSS10628	1.00255	1.5127	1.43433	2	0.592975	0.516275	-0.0766998	1	0	0	1	1125
NM_178663	Bend7	chr2_4636876-4640877	TSS10629	1.55321	2.14611	1.03402	2	0.466216	-0.586523	-1.05274	2	1	125	1	1600
NM_001005507	Smg7	chr1_154747776-154751777	TSS1063	11.9008	15.6445	11.2002	3	0.394569	-0.0875317	-0.482101	1	0	0	1	2675
NM_175400	Sephs1	chr2_4800609-4804610	TSS10630	23.7387	24.9865	29.8934	1	0.0739049	0.332574	0.258669	1	0	0	1	2885
NM_010726	Phyh	chr2_4838041-4842042	TSS10631	17.6845	11.9298	13.5633	1	-0.567876	-0.382752	0.185124	1	0	0	1	1050
NM_028804	Ccdc3	chr2_5056821-5060822	TSS10633	0.904147	0.945633	1.11914	1	0.0646531	0.307455	0.242802	1	0	0	2	1825
NM_016918	Nudt5	chr2_5764079-5768080	TSS10634	39.2052	39.9157	40.6614	1	0.0259106	0.0526136	0.0267029	1	0	0	1	2025
NM_001081132	Upf2	chr2_5870514-5874515	TSS10635	14.1673	14.3657	12.7684	1	0.0200621	-0.149976	-0.170038	1	0	0	1	2100
NR_033470	Gm10857	chr2_6051914-6055915	TSS10636	0.346548	0.453989	0.345079	2	0.388621	-0.00611193	-0.394733	1	0	0	1	200
NM_001080548	Usp6nl	chr2_6241802-6245803	TSS10637	6.88753	5.74092	6.81182	1	-0.262663	-0.0159441	0.246719	1	0	0	1	1750
NR_024257	4930412O13Rik	chr2_9800872-9804873	TSS10639	0.0525131	0.00686121	0.0174297	1	-2.76707	-1.53786	1.22921	2	1	3423	3	2351
NM_008485	Lamc2	chr1_155031577-155035578	TSS1064	0.760019	0.952132	1.18326	1	0.324744	0.637981	0.313238	2	1	150	1	975
NM_025280	Kin	chr2_10000238-10004239	TSS10640	13.2366	10.7477	12.051	1	-0.300479	-0.135369	0.16511	1	0	0	2	2100
NM_172471	Itih5	chr2_10073169-10077170	TSS10641	0.237675	0.148605	0.142452	1	-0.673889	-0.734479	-0.0605903	1	0	0	1	925
NM_177386	Sfmbt2	chr2_10292062-10296063	TSS10642	4.4805	4.05498	2.52674	1	-0.143931	-0.826134	-0.682202	2	1	825	1	4001
NM_010683	Lamc1	chr1_155177916-155181917	TSS1065	97.8805	144.182	90.9202	1	0.558793	-0.106419	-0.665212	1	0	0	1	2900
NR_033736	E330020D12Rik	chr1_155259363-155263364	TSS1066	2.25891	1.72879	1.59192	1	-0.385668	-0.504592	-0.118923	1	0	0	1	175
NM_008859	Prkcq	chr2_11092008-11096009	TSS10669	0.0852519	0.0114749	0.0142561	1	-2.78953	-2.49917	0.290358	1	0	0	1	725
NM_007842	Dhx9	chr1_155332790-155336791	TSS1067	95.5423	88.7622	92.6664	1	-0.106193	-0.0440928	0.0621002	1	0	0	2	1860
NM_133836	Il15ra	chr2_11625162-11629163	TSS10671	0	0	0.17105	1	0	7.42668	7.42668	2	2	475	1	1400
NM_008358	Il15ra	chr2_11625474-11629475	TSS10672	0.153522	0.117334	2.57e-05	3	-0.38494	-7.23506	-6.85012	2	3	750	1	1400
NM_177268	Ankrd16	chr2_11697379-11701380	TSS10673	3.59625	3.09828	3.02907	1	-0.214961	-0.247543	-0.032582	1	0	0	1	2650
NM_008961	Pter	chr2_12843667-12847668	TSS10674	1.25063	1.2364	1.50813	1	-0.0164962	0.269909	0.286405	1	0	0	1	575
NM_011701	Vim	chr2_13493937-13497938	TSS10675	17.1611	14.5	30.902	1	-0.243074	0.848521	1.09159	1	0	0	1	2325
NM_011484	Stam	chr2_13993738-13997739	TSS10676	13.8526	11.8409	11.7128	1	-0.22636	-0.242052	-0.0156914	1	0	0	1	1700
NM_028749	Npl	chr1_155394844-155398845	TSS1068	34.1317	64.9092	41.8333	1	0.927291	0.293532	-0.633759	1	0	0	1	700
NM_023116	Cacnb2	chr2_14523932-14527933	TSS10681	0.0492078	0.0796422	0.136911	1	0.683623	1.45775	0.774131	2	1	850	1	1475
NM_029466	Arl5b	chr2_14974988-14978989	TSS10683	7.57341	12.2471	8.17334	1	0.693353	0.109969	-0.583384	1	0	0	1	1600
NM_026162	Plxdc2	chr2_16275948-16279949	TSS10684	1.7148	2.02394	2.25767	1	0.238998	0.396592	0.157594	1	0	0	1	2600
NR_028378	Gm17762	chr2_17946875-17950876	TSS10685	0.346046	0.343098	0.530243	1	-0.0123074	0.614245	0.626552	2	3	776	1	3375
NM_010804	Mllt10	chr2_17974863-17978864	TSS10686	27.0592	26.2072	24.6487	1	-0.0461542	-0.134602	-0.0884482	1	0	0	2	1889
NM_147778	Commd3	chr2_18592088-18596089	TSS10687	17.5866	25.2324	26.5095	1	0.520776	0.592005	0.0712293	2	3	789	1	1350
NM_007552	Bmi1	chr2_18596644-18600645	TSS10688	2.97061	4.4251	3.75168	1	0.574791	0.336676	-0.238115	2	2	2401	1	2200
NM_001001334	BC061194	chr2_18618648-18622649	TSS10689	0	0.0244614	0.0839972	1	4.67024	6.40934	1.7391	2	2	2725	1	875
NR_024323	4930426L09Rik	chr2_18917945-18921946	TSS10690	0	0.026067	0.0579927	1	4.75846	5.88246	1.124	1	0	0	1	2275
NM_001081083	Armc3	chr2_19118744-19122745	TSS10691	0.0156082	0	0.0315607	1	-4.05382	0.971236	5.02506	1	0	0	1	1025
NM_029619	Msrb2	chr2_19291262-19295263	TSS10692	4.47433	5.17258	5.25709	1	0.209169	0.232545	0.0233759	1	0	0	1	1050
NM_018809	Ptf1a	chr2_19365289-19369290	TSS10693	0.0250732	0	0	1	-4.7045	-4.7045	0	2	2	3315	1	1775
NM_027715	Otud1	chr2_19577688-19581689	TSS10694	4.98229	4.8066	4.54196	1	-0.0517817	-0.133466	-0.0816843	1	0	0	1	2475
NM_001177631	Etl4	chr2_20439139-20443140	TSS10697	11.2112	12.2298	10.9993	2	0.125454	-0.0275192	-0.152973	1	0	0	1	2150
NR_033225	Gm13375	chr2_20888500-20892501	TSS10698	3.71259	2.30429	2.07609	1	-0.687866	-0.838251	-0.150385	1	0	0	1	3125
NM_001001297	Thnsl1	chr2_21125350-21129351	TSS10699	5.15914	4.97797	4.69932	2	-0.0515629	-0.134651	-0.0830883	1	0	0	1	1425
NM_001160386	Dnahc7b	chr1_46121582-46125583	TSS107	0.0981116	0.169264	0.170525	1	0.780648	0.791293	0.0106454	1	0	0	1	675
NM_009782	Cacna1e	chr1_156571050-156575051	TSS1070	0.00809096	0.0157997	0	1	0.885931	-3.18443	-4.07036	2	2	3326	1	1400
NM_001004761	Gpr158	chr2_21287193-21291194	TSS10700	0	0	0	1	0	0	0	2	1	1175	1	1975
NM_148413	Myo3a	chr2_22147129-22151130	TSS10701	0.0507101	0.0741764	0.0607861	1	0.539834	0.256836	-0.282998	1	0	0	1	575
NM_008078	Gad2	chr2_22475846-22479847	TSS10702	1.12553	0.83866	0.601426	1	-0.424009	-0.90303	-0.479021	2	2	3347	1	2175
NM_019456	Apbb1ip	chr2_22627846-22631847	TSS10703	0.150776	0	0.217092	1	-7.2458	0.522993	7.76879	2	2	425	1	725
NM_019501	Pdss1	chr2_22749041-22753042	TSS10704	6.57838	7.14037	8.09099	1	0.118249	0.298543	0.180294	1	0	0	1	1600
NM_028793	Acbd5	chr2_22921720-22925721	TSS10705	4.81661	6.82725	4.96097	2	0.503198	0.0425954	-0.460603	1	0	0	1	2000
NM_001102437	Acbd5	chr2_22922591-22926592	TSS10706	3.51085	4.61635	2.46393	2	0.394836	-0.510682	-0.905518	1	0	0	1	2000
NM_013771	Yme1l1	chr2_23010024-23014025	TSS10707	61.4304	67.2814	63.1557	1	0.131253	0.0399595	-0.0912934	1	0	0	2	2325
NM_008752	Nxph2	chr2_23174765-23178766	TSS10709	0.0292352	0.0244382	0	1	-0.249233	-4.91816	-4.66892	1	0	0	1	875
NM_010500	Ier5	chr1_156944766-156948767	TSS1071	4.43508	3.30294	3.42188	1	-0.425098	-0.374075	0.0510232	2	1	1700	1	1750
NM_177611	Psd4	chr2_24238916-24242917	TSS10718	0.953208	0.909031	0.48252	1	-0.0683881	-0.980728	-0.91234	1	0	0	2	900
NM_026021	Zmynd19	chr2_24803321-24807322	TSS10719	53.1657	52.6845	56.4011	1	-0.013117	0.085226	0.0983429	1	0	0	1	2350
NM_026044	Wdr85	chr2_24815941-24819942	TSS10720	7.07819	7.55301	6.76742	1	0.0936584	-0.0647652	-0.158424	1	0	0	1	1300
NM_146251	Pnpla7	chr2_24829552-24833553	TSS10721	5.03264	4.65761	3.36473	1	-0.111702	-0.580683	-0.46898	1	0	0	1	2150
NM_020276	Nelf	chr2_24907898-24911899	TSS10722	2.72133	2.66089	3.12476	7	-0.0323897	0.199367	0.231757	1	0	0	2	1475
NM_025980	Nrarp	chr2_25034277-25038278	TSS10724	3.70217	4.03674	4.29896	1	0.124787	0.215562	0.0907752	1	0	0	2	2303
NM_176834	Rnf208	chr2_25096448-25100449	TSS10726	4.70953	4.49004	4.54555	1	-0.0688398	-0.0511172	0.0177226	1	0	0	2	2427
NM_177344	Tmem203	chr2_25108958-25112959	TSS10727	6.1809	6.4642	5.83831	1	0.0646447	-0.0822524	-0.146897	1	0	0	1	2050
NM_175286	Tprn	chr2_25116117-25120118	TSS10728	5.363	5.17408	5.46131	1	-0.0517281	0.026202	0.07793	1	0	0	1	2593
NM_175300	Anapc2	chr2_25125985-25129986	TSS10729	35.3362	32.7152	32.1039	1	-0.111183	-0.138394	-0.0272117	1	0	0	1	2750
NM_011273	Xpr1	chr1_157262574-157266575	TSS1073	4.14285	4.65878	3.2091	1	0.16929	-0.368354	-0.537644	1	0	0	1	875
NM_030055	Tmem210	chr2_25141664-25145665	TSS10730	0	0	0	1	0	0	0	2	1	1340	1	415
NM_146117	Lrrc26	chr2_25143430-25147431	TSS10731	0	0.113444	0.0799953	1	6.8385	6.33977	-0.498732	2	1	3106	1	2181
NM_001029983	Man1b1	chr2_25186262-25190263	TSS10732	24.7248	21.7542	22.3159	1	-0.184657	-0.147881	0.0367764	1	0	0	1	2300
NM_001081085	2010317E24Rik	chr2_25225840-25229841	TSS10733	11.9231	10.6371	12.2005	1	-0.16464	0.0331781	0.197818	1	0	0	1	1975
NM_009849	Entpd2	chr2_25249393-25253394	TSS10734	1.94388	1.58924	1.00829	1	-0.290437	-0.94634	-0.655904	2	1	1300	1	1050
NM_008721	Npdc1	chr2_25256602-25260603	TSS10735	11.0154	12.2758	11.0169	1	0.156282	0.000196425	-0.156085	2	1	150	1	1275
NM_001177366	Fut7	chr2_25277213-25281214	TSS10736	0.108338	0	0.245686	3	-6.77265	1.17388	7.94653	2	1	364	1	889
NM_007379	Abca2	chr2_25282193-25286194	TSS10737	5.20898	5.49939	4.56563	1	0.0782561	-0.190148	-0.268404	2	1	250	1	950
NM_027085	Clic3	chr2_25310362-25314363	TSS10738	0.343331	0.441758	0.647116	1	0.362722	0.912456	0.549734	1	0	0	2	275
NM_013908	Fbxw5	chr2_25354297-25358298	TSS10739	12.7873	11.2237	10.813	1	-0.188148	-0.241924	-0.0537766	1	0	0	1	2225
NM_010712	Lhx4	chr1_157587157-157591158	TSS1074	0.0207916	0	0.0212556	1	-4.4457	0.0303963	4.4761	2	2	3443	1	2775
NM_021519	Edf1	chr2_25411419-25415420	TSS10740	92.7466	77.671	98.0415	1	-0.255915	0.0800973	0.336013	1	0	0	1	1775
NM_023326	Bmyc	chr2_25560398-25564399	TSS10746	5.42717	6.25181	6.8405	1	0.204039	0.333847	0.129808	1	0	0	1	975
NM_023268	Qsox1	chr1_157658029-157662030	TSS1075	8.54421	5.89254	5.8049	2	-0.535981	-0.557596	-0.0216147	1	0	0	1	1425
NM_001145403	Kcnt1	chr2_25717373-25721374	TSS10751	0.790236	0.53887	0.697254	3	-0.551496	-0.180356	0.37114	1	0	0	1	1125
NM_175462	Kcnt1	chr2_25731380-25735381	TSS10752	0.226609	5.32975e-06	0.0198265	1	-7.82275	-3.45007	4.37268	2	2	350	1	1025
NM_153410	Gpsm1	chr2_26169052-26173053	TSS10753	4.37017	3.6589	4.47891	1	-0.256215	0.0354503	0.291666	1	0	0	1	1250
NM_173180	Pmpca	chr2_26242867-26246868	TSS10754	49.3456	47.7264	49.9635	1	-0.0481329	0.0179527	0.0660857	1	0	0	1	1875
NM_178444	Egfl7	chr2_26434575-26438576	TSS10755	0	0.00613154	1.13907	3	2.83421	10.1549	7.32069	1	0	0	1	300
NM_198724	Egfl7	chr2_26437383-26441384	TSS10756	0.444148	0.580554	3.39432	2	0.38563	2.93119	2.54556	1	0	0	1	300
NM_001164564	Egfl7	chr2_26440149-26444150	TSS10757	26.2945	29.3311	23.1365	2	0.157663	-0.184581	-0.342245	1	0	0	1	1550
NM_019833	Fam69b	chr2_26481976-26485977	TSS10759	2.60897	3.12665	2.5798	1	0.261046	-0.0162149	-0.277261	1	0	0	1	1525
NM_001039184	Cep350	chr1_157818385-157822386	TSS1076	2.33822	3.0904	1.81302	1	0.402233	-0.366837	-0.76907	1	0	0	1	2150
NM_013721	Rpl7a	chr2_26764326-26768327	TSS10760	732.567	708.063	866.517	1	-0.0490829	0.242267	0.29135	1	0	0	2	3676
NM_013678	Surf2	chr2_26769940-26773941	TSS10761	20.1666	20.8336	20.4228	1	0.046942	0.0182119	-0.0287301	1	0	0	1	2450
NM_198628	Gm711	chr2_26787588-26791589	TSS10762	0.0700188	0.0193499	0.0473318	1	-1.80318	-0.555228	1.24795	1	0	0	1	1875
NM_029862	5930434B04Rik	chr2_26863445-26867446	TSS10764	7.35898	6.46684	8.31978	1	-0.186418	0.177017	0.363435	1	0	0	1	1325
NM_029981	Adamtsl2	chr2_26932900-26936901	TSS10765	0	0	0	1	0	0	0	1	0	0	1	400
NM_080848	Wdr5	chr2_27368666-27372667	TSS10767	60.5622	64.5525	57.9623	1	0.0920539	-0.0633017	-0.155356	1	0	0	1	3167
NM_011305	Rxra	chr2_27530720-27534721	TSS10768	5.02733	4.74066	4.87556	1	-0.0846871	-0.0442155	0.0404716	2	2	700	1	2300
NM_015734	Col5a1	chr2_27739944-27743945	TSS10769	0.975741	0.458241	1.19128	1	-1.08872	0.287675	1.3764	2	1	1195	1	1700
NM_001160019	Tor1aip1	chr1_157879947-157883948	TSS1077	2.07074	1.50864	1.81341	1	-0.456638	-0.191342	0.265296	1	0	0	1	1700
NM_001038614	Olfm1	chr2_28046612-28050613	TSS10771	3.13964	2.50185	2.16331	2	-0.327489	-0.537152	-0.209662	2	2	425	1	1400
NM_019498	Olfm1	chr2_28059208-28063209	TSS10772	1.47237	1.91755	2.12662	2	0.3809	0.530123	0.149224	2	2	675	1	1375
NM_001005420	Ppp1r26	chr2_28301460-28305461	TSS10773	1.11964	1.3174	1.20573	1	0.234465	0.10678	-0.127685	1	0	0	1	1425
NM_080452	Mrps2	chr2_28321585-28325586	TSS10774	26.2928	28.3505	31.9672	2	0.108704	0.281916	0.173212	1	0	0	2	2851
NM_009058	Ralgds	chr2_28366686-28370687	TSS10776	4.71563	3.90272	3.0274	2	-0.272907	-0.6392	-0.366293	1	0	0	1	2500
NM_001145835	Ralgds	chr2_28386983-28390984	TSS10777	3.49435	4.01633	4.87124	2	0.2008	0.479148	0.278348	1	0	0	1	725
NM_022887	Tsc1	chr2_28494762-28498763	TSS10778	8.45647	8.04964	6.16248	1	-0.0711227	-0.456481	-0.385358	1	0	0	1	1750
NM_001033874	Ak8	chr2_28553680-28557681	TSS10779	0.607846	0.533112	0.740193	1	-0.188935	0.283772	0.472707	1	0	0	1	1400
NM_001160018	Tor1aip1	chr1_157881610-157885611	TSS1078	1.80466	2.33443	3.01735	2	0.371162	0.741236	0.370074	1	0	0	2	1800
NM_001033294	Ddx31	chr2_28693925-28697926	TSS10780	4.65691	4.8625	4.30265	1	0.0623122	-0.114122	-0.176434	1	0	0	2	2025
NM_009442	Ttf1	chr2_28913782-28917783	TSS10781	8.4945	8.50111	8.18057	1	0.00112207	-0.0543211	-0.0554432	1	0	0	1	1450
NM_198033	Setx	chr2_28978511-28982512	TSS10782	29.3721	33.6277	26.8993	1	0.195197	-0.126873	-0.322071	1	0	0	3	2276
NM_026896	Med27	chr2_29200355-29204356	TSS10783	7.53277	6.43616	8.76896	1	-0.226948	0.219198	0.446146	1	0	0	1	875
NM_001039086	Rapgef1	chr2_29473239-29477240	TSS10784	16.1943	16.6103	16.8063	6	0.0365865	0.0535112	0.0169247	1	0	0	2	1700
NM_178693	Coq4	chr2_29641782-29645783	TSS10786	3.48791	3.00464	2.58228	1	-0.215104	-0.433572	-0.218468	1	0	0	1	2675
NM_011989	Slc27a4	chr2_29656199-29660200	TSS10787	6.26652	5.15231	5.86846	1	-0.282395	-0.0946669	0.187728	1	0	0	1	1075
NM_026615	Urm1	chr2_29680908-29684909	TSS10788	13.512	11.7715	11.9012	1	-0.198927	-0.18312	0.0158075	1	0	0	2	2425
NM_207298	Cercam	chr2_29723013-29727014	TSS10789	5.96623	5.96962	5.65154	1	0.000819366	-0.0781621	-0.0789815	1	0	0	1	1725
NM_177838	Fam163a	chr1_158133156-158137157	TSS1079	0.136766	0.0917563	0.0604682	1	-0.570703	-1.16431	-0.593605	2	1	2600	1	1150
NM_001113213	Odf2	chr2_29743239-29747240	TSS10790	53.2724	57.1795	43.0624	7	0.10211	-0.306954	-0.409063	1	0	0	1	2865
NM_013615	Odf2	chr2_29743582-29747583	TSS10791	34.5959	28.3513	34.9373	4	-0.287178	0.0141662	0.301344	1	0	0	1	2925
NM_028923	Gle1	chr2_29788928-29792929	TSS10792	14.6747	13.5793	15.3756	1	-0.111914	0.0673072	0.179221	1	0	0	1	1275
NM_001177667	Spna2	chr2_29819079-29823080	TSS10793	45.0119	46.6626	37.5643	5	0.0519603	-0.260938	-0.312899	1	0	0	2	1900
NM_023871	Set	chr2_29915515-29919516	TSS10794	567.418	521.487	636.88	1	-0.12178	0.166609	0.28839	1	0	0	1	2916
NM_153805	Pkn3	chr2_29932285-29936286	TSS10795	9.29674	9.21007	7.68334	1	-0.0135113	-0.274959	-0.261447	1	0	0	2	2625
NM_146252	Tbc1d13	chr2_29987390-29991391	TSS10796	33.2195	29.1213	24.6025	1	-0.189949	-0.43321	-0.243261	1	0	0	1	2375
NM_007931	Endog	chr2_30025043-30029044	TSS10797	3.09237	3.20887	2.98061	1	0.0533355	-0.0530878	-0.106423	1	0	0	1	1300
NM_177725	Lrrc8a	chr2_30091288-30095289	TSS10798	6.00812	5.09915	5.39511	1	-0.236614	-0.155234	0.0813801	1	0	0	1	2375
NM_172267	Phyhd1	chr2_30120048-30124049	TSS10799	1.49956	1.60333	1.31015	1	0.0964699	-0.194668	-0.291138	1	0	0	3	750
NM_019790	Tmeff2	chr1_50982366-50986367	TSS108	0.324922	0.209352	0.233767	1	-0.631721	-0.473297	0.158424	2	3	1084	1	1850
NM_001134741	Tdrd5	chr1_158231479-158235480	TSS1080	4.05428	3.30614	2.30954	1	-0.294217	-0.811571	-0.517354	2	1	800	1	1050
NM_198304	Nup188	chr2_30139952-30143953	TSS10800	49.0796	50.5498	47.2901	1	0.042581	-0.0535842	-0.0961652	1	0	0	2	2450
NM_175392	Fam73b	chr2_30217854-30221855	TSS10801	4.02937	3.24054	3.67449	1	-0.314233	-0.132976	0.181257	1	0	0	1	1775
NM_020329	Dolpp1	chr2_30245935-30249936	TSS10802	11.4913	9.55768	8.55568	1	-0.265784	-0.425545	-0.15976	1	0	0	1	1775
NM_138748	Ppp2r4	chr2_30269569-30273570	TSS10803	70.4669	59.359	74.4544	1	-0.247475	0.0794103	0.326885	1	0	0	1	2275
NM_030137	Cstad	chr2_30448563-30452564	TSS10804	0.543405	0	0	1	-9.08854	-9.08854	0	1	0	0	1	1275
NM_170592	Mettl11a	chr2_30661496-30665497	TSS10805	21.4204	18.8875	22.7466	1	-0.181545	0.0866616	0.268206	1	0	0	2	2750
NM_009116	Prrx2	chr2_30698886-30702887	TSS10806	1.31874	1.09202	2.21419	1	-0.271934	0.747177	1.01911	2	1	75	1	1300
NM_133673	Tor1b	chr2_30806520-30810521	TSS10807	9.05475	8.4056	10.6059	1	-0.107312	0.228097	0.335409	1	0	0	2	1950
NM_028846	Usp20	chr2_30835798-30839799	TSS10808	3.60944	2.76879	3.55203	1	-0.382398	-0.0231248	0.359273	1	0	0	1	1975
NM_178760	Gpr107	chr2_31005835-31009836	TSS10809	15.477	12.1006	12.1966	1	-0.355021	-0.343622	0.0113995	1	0	0	1	1700
NM_009230	Soat1	chr1_158402459-158406460	TSS1081	22.4089	30.8478	24.0117	1	0.461078	0.0996614	-0.361417	1	0	0	2	1100
NM_019681	Ncs1	chr2_31099442-31103443	TSS10810	3.64458	3.2184	4.39723	1	-0.179357	0.270775	0.450131	2	1	1733	1	2075
NM_007494	Ass1	chr2_31323789-31327790	TSS10811	38.8249	33.5732	33.5386	1	-0.209666	-0.211154	-0.00148754	1	0	0	1	2725
NM_001033389	Fubp3	chr2_31426244-31430245	TSS10812	38.2493	36.8504	39.4716	1	-0.0537516	0.0453805	0.0991321	1	0	0	1	3020
NM_001123362	Prdm12	chr2_31493556-31497557	TSS10813	0.0401286	0.0388841	0.0744989	1	-0.0443282	0.876314	0.920642	2	1	4001	4	2001
NM_144886	Exosc2	chr2_31524256-31528257	TSS10814	40.5329	33.404	45.1304	1	-0.279065	0.155003	0.434067	1	0	0	2	1175
NM_001112703	Abl1	chr2_31542075-31546076	TSS10815	7.7445	7.1844	6.66803	1	-0.10829	-0.215881	-0.107592	1	0	0	1	2000
NM_009594	Abl1	chr2_31613464-31617465	TSS10816	6.61666	6.12006	6.76631	1	-0.11254	0.0322613	0.144801	1	0	0	1	1900
NM_011836	Lamc3	chr2_31740800-31744801	TSS10817	0.0767664	0.0118382	0.0140287	1	-2.5987	-2.37143	0.227277	1	0	0	1	700
NM_145144	Aif1l	chr2_31803822-31807823	TSS10818	4.50503	4.47803	4.40466	1	-0.00867059	-0.0324988	-0.0238282	2	1	850	1	975
NM_172268	Nup214	chr2_31827969-31831970	TSS10819	13.3772	14.2954	13.9766	1	0.0957679	0.0632326	-0.0325352	1	0	0	1	1700
NM_023141	Tor3a	chr1_158602470-158606471	TSS1082	14.5623	12.2456	13.6571	1	-0.249956	-0.0925805	0.157376	1	0	0	1	2050
NM_145521	Ppapdc3	chr2_31949170-31953171	TSS10820	1.23749	0.950328	0.400487	1	-0.380567	-1.62516	-1.24459	1	0	0	1	800
NM_001159634	Prrc2b	chr2_32004667-32008668	TSS10821	53.7898	46.8753	45.3222	2	-0.198502	-0.247111	-0.048609	1	0	0	1	2843
NM_145145	Pomt1	chr2_32090202-32094203	TSS10822	9.51951	7.33034	8.66065	1	-0.376962	-0.136397	0.240565	1	0	0	3	2525
NM_133852	Golga2	chr2_32141772-32145773	TSS10824	8.44163	8.36627	7.80643	2	-0.0129355	-0.112845	-0.0999093	1	0	0	2	2725
NR_029811	Mir199b	chr2_32171979-32175980	TSS10825	0	0	0	1	0	0	0	1	0	0	1	925
NM_028412	Ciz1	chr2_32216717-32220718	TSS10826	7.28839	6.94216	7.26562	1	-0.0702057	-0.00451363	0.065692	1	0	0	2	2108
NM_133783	Ptges2	chr2_32249409-32253410	TSS10827	7.17291	6.55859	6.64124	1	-0.129154	-0.11109	0.0180642	1	0	0	1	2550
NM_194335	Naif1	chr2_32303976-32307977	TSS10828	0.651388	0.477937	0.437297	1	-0.445894	-0.573821	-0.127927	1	0	0	2	1802
NM_153560	Fam102a	chr2_32388878-32392879	TSS10829	5.1399	5.23738	4.80331	1	0.0270998	-0.0976917	-0.124791	1	0	0	1	3029
NM_145413	Fam20b	chr1_158647041-158651042	TSS1083	9.47918	8.68626	9.13211	1	-0.126013	-0.0538082	0.072205	1	0	0	1	1650
NM_010073	Dpm2	chr2_32424377-32428378	TSS10830	11.4185	11.0733	16.1125	1	-0.044284	0.49677	0.541054	1	0	0	1	1200
NM_198191	Pip5kl1	chr2_32429338-32433339	TSS10831	0.361804	0.672876	0.824574	1	0.893293	1.18621	0.292914	1	0	0	1	1250
NM_016973	St6galnac6	chr2_32460480-32464481	TSS10832	3.00631	2.6216	3.36588	3	-0.197474	0.162938	0.360413	1	0	0	1	2581
NM_001025310	St6galnac6	chr2_32460480-32464481	TSS10834	6.68801	3.72768	5.9379	2	-0.843128	-0.171597	0.671531	1	0	0	1	2581
NM_021515	Ak1	chr2_32483019-32487020	TSS10835	13.8865	11.5571	13.0297	1	-0.264883	-0.0918723	0.17301	1	0	0	1	4001
NM_007932	Eng	chr2_32500114-32504115	TSS10836	4.04349	3.6622	4.66369	3	-0.142854	0.205823	0.348676	1	0	0	1	2000
NM_152800	Tor2a	chr2_32610753-32614754	TSS10838	17.5747	15.8154	17.0775	1	-0.152161	-0.0414009	0.11076	1	0	0	1	825
NM_178595	Ptrh1	chr2_32629340-32633341	TSS10839	8.22474	7.31623	7.34657	1	-0.168848	-0.162878	0.00596959	1	0	0	1	1725
NM_001159965	Ralgps2	chr1_158867757-158871758	TSS1084	1.87906	0.848077	0	4	-1.14682	-10.8766	-9.72975	1	0	0	1	1850
NM_146119	Fam129b	chr2_32729653-32733654	TSS10840	27.0159	24.6482	26.8256	1	-0.132321	-0.0101979	0.122123	1	0	0	1	2804
NM_009076	Rpl12	chr2_32815231-32819232	TSS10841	1121.06	1013.61	1047.52	1	-0.145361	-0.0978856	0.0474751	1	0	0	2	3301
NR_002898	Snora65	chr2_32816820-32820821	TSS10842	34.91	19.5159	12.1239	1	-0.838958	-1.52571	-0.686751	1	0	0	1	3630
NM_011923	Angptl2	chr2_33069480-33073481	TSS10843	1.467	0.803181	3.31492	1	-0.86826	1.17556	2.04382	1	0	0	1	1125
NM_001163434	Hspa5	chr2_34625609-34629610	TSS10845	234.068	260.735	240.984	2	0.155654	0.0420083	-0.113645	1	0	0	3	2160
NM_030021	D730039F16Rik	chr2_34727955-34731956	TSS10846	0.191407	0.353919	0.244976	1	0.883329	0.354356	-0.528972	1	0	0	1	775
NM_012018	Cep110	chr2_34963011-34967012	TSS10847	6.52552	6.6774	5.28396	1	0.0331886	-0.304421	-0.33761	1	0	0	1	1400
NM_146120	Gsn	chr2_35135899-35139900	TSS10848	7.94699	10.1011	6.00093	1	0.345993	-0.405164	-0.751157	2	1	200	1	625
NM_001114125	Dab2ip	chr2_35411977-35415978	TSS10849	4.28216	6.02358	3.70438	2	0.492185	-0.209054	-0.701239	1	0	0	1	800
NM_023884	Ralgps2	chr1_158867757-158871758	TSS1085	11.6989	12.4804	11.0011	7	0.093286	-0.0887143	-0.182	1	0	0	1	1850
NM_001114124	Dab2ip	chr2_35475500-35479501	TSS10850	1.9556	1.54738	1.58372	2	-0.337589	-0.304121	0.0334684	1	0	0	2	2075
NM_001001602	Dab2ip	chr2_35545513-35549514	TSS10851	3.64183	3.92551	3.252	2	0.108188	-0.163289	-0.271477	1	0	0	1	675
NM_029309	Morn5	chr2_35902992-35906993	TSS10852	0	0.0408538	0	1	5.38729	0	-5.38729	1	0	0	1	700
NM_026422	Mrrf	chr2_35989917-35993918	TSS10853	12.0954	9.1334	9.63542	1	-0.405196	-0.328009	0.0771873	1	0	0	1	1100
NM_008969	Ptgs1	chr2_36083945-36087946	TSS10854	0.23082	0.417461	0.496467	1	0.852088	1.1016	0.249508	1	0	0	1	700
NM_177644	Rasal2	chr1_159340726-159344727	TSS1087	2.83525	2.726	2.27522	1	-0.05667	-0.317345	-0.260675	1	0	0	1	1675
NM_146121	Rabgap1	chr2_37296804-37300805	TSS10876	15.0176	14.4283	11.9759	3	-0.0577511	-0.326498	-0.268747	1	0	0	2	1350
NM_001033960	Rabgap1	chr2_37305773-37309774	TSS10877	0.00179259	0.349636	0.407381	1	6.97223	7.19217	0.219942	1	0	0	1	2050
NM_177383	Gpr21	chr2_37370145-37374146	TSS10878	0.0966768	0.193085	0.255579	1	0.990601	1.39332	0.402714	1	0	0	1	300
NM_001163566	Crb2	chr2_37629768-37633769	TSS10879	0.682489	0.461365	0.786295	1	-0.563886	0.203986	0.767872	1	0	0	1	1150
NM_207583	Fam5b	chr1_160284391-160288392	TSS1088	0.281052	0.230105	0.372648	1	-0.287413	0.405719	0.693131	2	1	1100	1	1100
NM_010710	Lhx2	chr2_38204827-38208828	TSS10880	0.859947	0.596551	0.442701	1	-0.526863	-0.956337	-0.429474	2	2	3776	1	1900
NM_021606	Nek6	chr2_38365216-38369217	TSS10881	4.62987	4.75683	5.76354	1	0.0390205	0.315922	0.276902	1	0	0	1	1300
NM_001159631	Nek6	chr2_38365395-38369396	TSS10882	0	0	0	1	0	0	0	1	0	0	1	1300
NM_172854	Olfml2a	chr2_38785499-38789500	TSS10885	0.368346	0.28163	0.115633	1	-0.386058	-1.663	-1.27694	1	0	0	1	875
NM_029687	Wdr38	chr2_38851828-38855829	TSS10886	0	0	0	1	0	0	0	1	0	0	1	1350
NM_028809	Arpc5l	chr2_38861658-38865659	TSS10887	33.0266	30.6143	35.9527	1	-0.109419	0.122468	0.231887	1	0	0	2	2567
NM_001177394	Gm13476	chr2_44964657-44968658	TSS10890	0.124246	0	0	1	-6.96862	-6.96862	0	2	5	1125	2	1593
NM_001177395	Gm13476	chr2_44965779-44969780	TSS10891	7.93748e-05	0.0228018	0	1	4.4628	-0.110196	-4.573	2	5	1425	2	471
NM_007396	Acvr2a	chr2_48667628-48671629	TSS10892	3.64329	4.439	3.90238	1	0.284922	0.0990861	-0.185836	1	0	0	1	2225
NM_029924	Mbd5	chr2_48803027-48807028	TSS10893	1.14181	1.28184	0.915333	1	0.166756	-0.318642	-0.485397	1	0	0	2	1925
NM_172663	Epc2	chr2_49305005-49309006	TSS10894	9.22761	7.90027	8.92271	1	-0.224029	-0.0484697	0.175559	1	0	0	1	2250
NM_008449	Kif5c	chr2_49472833-49476834	TSS10895	4.06294	4.86845	3.90758	1	0.26088	-0.0562345	-0.317114	1	0	0	1	1675
NM_027990	Lypd6b	chr2_49641205-49645206	TSS10896	0.357564	0.721929	0.749291	1	1.01162	1.06522	0.0535963	2	3	2306	1	1075
NR_033304	Lypd6	chr2_49919948-49923949	TSS10897	0.406478	0.393908	0.455359	2	-0.0452057	0.163447	0.208652	2	1	100	1	1325
NM_009398	Tnfaip6	chr2_51891632-51895633	TSS10900	0.323085	0.487529	0.523373	1	0.592072	0.694221	0.102149	1	0	0	1	375
NM_175238	Rif1	chr2_51926356-51930357	TSS10901	52.733	61.9799	45.3726	1	0.23309	-0.21688	-0.449971	1	0	0	1	2900
NM_172409	Fmnl2	chr2_52714901-52718902	TSS10902	9.16981	8.42377	8.14902	1	-0.122412	-0.170246	-0.0478337	1	0	0	1	2325
NM_022989	Arl6ip6	chr2_53049117-53053118	TSS10903	25.8624	26.5965	26.1042	1	0.0403787	0.0134253	-0.0269534	1	0	0	3	2408
NM_173030	Galnt13	chr2_54286797-54290798	TSS10904	0.106134	0.0958421	0.207841	1	-0.14571	0.962989	1.1087	2	1	625	1	1850
NM_008426	Kcnj3	chr2_55287566-55291567	TSS10905	0.708125	1.67979	1.4609	1	1.24503	1.04373	-0.201295	1	0	0	1	2575
NM_001145820	Gpd2	chr2_57088088-57092089	TSS10906	0.574565	3.28114	1.41703	1	2.51159	1.30084	-1.21075	1	0	0	1	2025
NM_010274	Gpd2	chr2_57088792-57092793	TSS10907	20.8247	20.8265	24.8816	1	0.000124689	0.256772	0.256648	1	0	0	1	2025
NM_009786	Cacybp	chr1_162141023-162145024	TSS1091	164.056	162.044	152.175	1	-0.0178026	-0.108456	-0.0906537	1	0	0	2	2327
NM_175464	Pkp4	chr2_58996906-59000907	TSS10910	22.5009	23.324	21.6231	2	0.0518309	-0.0574081	-0.109239	1	0	0	1	2575
NM_198294	Tanc1	chr2_59448100-59452101	TSS10912	13.8638	13.8681	12.6449	1	0.000447365	-0.132757	-0.133204	1	0	0	1	2750
NM_020575	2016-03-08	chr2_60045992-60049993	TSS10913	26.8728	31.054	24.8041	1	0.208625	-0.115564	-0.324189	1	0	0	1	2225
NM_001164072	Tank	chr2_61429153-61433154	TSS10915	3.47704	3.33336	5.2414	2	-0.0608667	0.591951	0.652818	1	0	0	1	1100
NM_021526	Psmd14	chr2_61547750-61551751	TSS10916	69.4776	77.8428	77.4435	1	0.164013	0.156594	-0.00741935	1	0	0	1	2350
NM_009322	Tbr1	chr2_61640509-61644510	TSS10917	0.0400374	0.0591918	0.055945	1	0.552628	0.47263	-0.0799978	2	2	1835	1	875
NM_033552	Slc4a10	chr2_61882571-61886572	TSS10918	0.0569566	0.0272479	0	1	-1.03683	-5.8569	-4.82007	1	0	0	1	525
NM_145523	Gca	chr2_62500383-62504384	TSS10919	5.21554	7.06114	7.76333	1	0.437012	0.573768	0.136756	1	0	0	1	900
NM_001038621	Rabgap1l	chr1_162279702-162283703	TSS1092	2.3014	2.76174	2.95526	1	0.262961	0.360635	0.0976734	1	0	0	1	250
NM_001099298	Scn2a1	chr2_65506501-65510502	TSS10920	0.0378927	0.0378976	0.101842	1	0.00018175	1.40286	1.40268	1	0	0	1	225
NM_178634	Csrnp3	chr2_65681823-65685824	TSS10921	1.57536	1.58789	1.65751	2	0.0114276	0.0732961	0.0618685	1	0	0	1	225
NR_033495	Gm13629	chr2_66276936-66280937	TSS10922	0.0297534	0.0063391	0.0853493	1	-2.06707	1.48944	3.55651	1	0	0	1	200
NM_172856	Lass6	chr2_68697613-68701614	TSS10928	3.89207	4.71292	3.02012	1	0.276019	-0.365825	-0.641844	1	0	0	1	1675
NM_013862	Rabgap1l	chr1_162721069-162725070	TSS1093	1.60706	1.91323	1.34557	1	0.251443	-0.256032	-0.507475	1	0	0	1	1525
NM_028284	Bbs5	chr2_69483311-69487312	TSS10932	4.36539	4.71976	3.89124	1	0.112578	-0.16584	-0.278418	1	0	0	1	1025
NM_001081086	Ppig	chr2_69559144-69563145	TSS10934	44.3176	41.7334	41.1913	1	-0.0866753	-0.105538	-0.0188623	1	0	0	1	1700
NM_028521	Phospho2	chr2_69625793-69629794	TSS10935	3.8789	6.22135	6.39284	1	0.68144	0.720663	0.0392231	1	0	0	1	925
NM_177784	Klhl23	chr2_69658426-69662427	TSS10936	2.92143	3.4296	3.43533	1	0.231292	0.2337	0.00240767	1	0	0	1	1375
NM_009278	Ssb	chr2_69697618-69701619	TSS10937	157.529	151.552	156.499	2	-0.0558087	-0.00946945	0.0463393	1	0	0	1	1675
NM_177783	Ubr3	chr2_69733302-69737303	TSS10938	16.9201	18.5513	15.9548	2	0.132776	-0.0847486	-0.217525	1	0	0	1	1625
NM_177376	Myo3b	chr2_69875182-69879183	TSS10939	0.00825489	0.0132546	0	1	0.62314	-3.21022	-3.83336	1	0	0	1	500
NM_022435	Sp5	chr2_70310979-70314980	TSS10940	0.119267	0.115725	0.253955	1	-0.0431272	1.084	1.12713	2	2	3655	2	3230
NM_025744	4933404M02Rik	chr2_70344875-70348876	TSS10941	0.0674034	0.0394548	0.114337	1	-0.757757	0.753715	1.51147	1	0	0	1	1175
NM_008077	Gad1	chr2_70398220-70402221	TSS10942	0.83331	1.17247	0.818579	1	0.492126	-0.0257005	-0.517826	2	3	2946	1	2950
NR_027343	Gorasp2	chr2_70497565-70501566	TSS10943	34.7859	37.3806	37.6827	2	0.103785	0.115398	0.0116134	1	0	0	1	1725
NM_001165981	Dcaf17	chr2_70891800-70895801	TSS10944	14.7633	15.9893	12.3206	6	0.115087	-0.260922	-0.376009	1	0	0	2	1800
NM_028593	Cybrd1	chr2_70954110-70958111	TSS10945	0.669008	0.612229	0.532187	1	-0.127752	-0.329537	-0.201784	2	1	800	1	1125
NM_010064	Dync1i2	chr2_71048002-71052003	TSS10946	54.9347	54.4777	50.5243	1	-0.0120517	-0.120738	-0.108686	1	0	0	1	1050
NM_026115	Hat1	chr2_71225316-71229317	TSS10947	238.169	243.774	244.81	1	0.0335585	0.0396767	0.0061182	1	0	0	2	1925
NM_025633	Metap1d	chr2_71289394-71293395	TSS10948	4.73763	5.44409	5.38834	1	0.200486	0.185639	-0.0148473	1	0	0	1	850
NM_010053	Dlx1	chr2_71365501-71369502	TSS10949	0.107464	0.0570091	0.246779	1	-0.902865	1.19184	2.0947	2	3	3276	1	1950
NM_173424	Zbtb37	chr1_162962390-162966391	TSS1095	0.321297	0.792315	0.578344	1	1.2995	0.846029	-0.453474	1	0	0	1	2216
NM_008397	Itga6	chr2_71623139-71627140	TSS10950	30.1623	29.1493	28.6944	1	-0.0492835	-0.0719748	-0.0226912	1	0	0	1	2100
NM_172665	Pdk1	chr2_71709328-71713329	TSS10951	39.3163	52.3964	57.0933	1	0.414331	0.538182	0.123851	1	0	0	3	1854
NM_019688	Rapgef4	chr2_71817271-71821272	TSS10952	0.0508728	0.0280313	0.0511682	1	-0.837369	0.00819241	0.845561	2	3	425	1	925
NM_001164791	B230120H23Rik	chr2_72121757-72125758	TSS10953	6.31192	6.9031	6.50198	3	0.129146	0.0427942	-0.0863513	1	0	0	1	1075
NM_025866	Cdca7	chr2_72312275-72316276	TSS10954	57.3627	50.8091	60.1513	1	-0.175023	0.0684818	0.243505	1	0	0	2	2101
NM_001005343	Sp9	chr2_73107982-73111983	TSS10955	0.0383258	0.0484544	0.093756	1	0.330623	1.26874	0.938118	2	1	3943	3	2208
NM_029022	Scrn3	chr2_73148708-73152709	TSS10956	7.34317	7.25144	7.07185	1	-0.018133	-0.0543078	-0.0361748	1	0	0	1	1625
NM_008275	Hoxd13	chr2_74504366-74508367	TSS10957	0.423241	0.432218	0.408748	1	0.0302091	-0.0501471	-0.0803563	2	3	3026	1	1325
NM_008274	Hoxd12	chr2_74511086-74515087	TSS10958	0.0349073	0	0	1	-5.16621	-5.16621	0	2	1	3637	2	764
NM_008273	Hoxd11	chr2_74518449-74522450	TSS10959	0.0863213	0.02301	0.0231537	1	-1.8627	-1.85409	0.0086088	2	4	2426	1	1500
NM_172644	Dars2	chr1_162998763-163002764	TSS1096	14.0786	14.73	18.1381	1	0.065249	0.365497	0.300248	1	0	0	1	2700
NM_013554	Hoxd10	chr2_74528004-74532005	TSS10960	0.0552197	0.047059	0.029163	1	-0.226269	-0.898296	-0.672027	2	1	4001	2	1000
NM_013555	Hoxd9	chr2_74533819-74537820	TSS10961	0.504639	0.507049	0.250345	1	0.0068599	-1.00844	-1.0153	2	2	3751	2	1500
NM_008276	Hoxd8	chr2_74541545-74545546	TSS10962	0.388739	0.641045	0.136908	1	0.720166	-1.4988	-2.21897	2	3	2651	1	1475
NM_010468	Hoxd3	chr2_74548049-74552050	TSS10963	0.0285581	0	0.014663	1	-4.88548	-0.916193	3.96929	2	2	3701	1	800
NM_010469	Hoxd4	chr2_74558034-74562035	TSS10964	0.0308672	0.0550242	0.0454732	1	0.813978	0.544327	-0.269651	2	3	385	1	275
NR_029566	Mir10b	chr2_74562126-74566127	TSS10965	0	0	0	1	0	0	0	2	2	3726	1	675
NM_010467	Hoxd1	chr2_74599036-74603037	TSS10966	0.172231	0.175568	0.0387195	1	0.0275268	-2.12478	-2.1523	2	5	2075	1	1225
NM_016804	Mtx2	chr2_74661868-74665869	TSS10967	24.023	24.4957	26.2362	1	0.028111	0.127137	0.0990264	1	0	0	1	975
NR_033513	Gm6793	chr2_75495346-75499347	TSS10968	1909.02	1602.1	1791.22	8	-0.252868	-0.091886	0.160982	1	0	0	2	2675
NM_172666	Agps	chr2_75668233-75672234	TSS10969	26.7672	28.4005	25.9389	1	0.085447	-0.0453472	-0.130794	1	0	0	2	1525
NM_001039482	Klhl20	chr1_163059610-163063611	TSS1097	6.0375	5.35215	4.49946	1	-0.173802	-0.424118	-0.250316	1	0	0	1	850
NM_153405	Rbm45	chr2_76206040-76210041	TSS10970	21.0066	18.7727	17.7961	1	-0.162198	-0.239269	-0.0770708	1	0	0	1	1425
NM_145525	Osbpl6	chr2_76242594-76246595	TSS10971	0.917361	1.35882	1.01829	1	0.566282	0.150431	-0.415851	2	3	3081	1	1700
NM_001080711	Dfnb59	chr2_76486329-76490330	TSS10972	0	0	0	1	0	0	0	1	0	0	1	796
NM_031256	Plekha3	chr2_76511371-76515372	TSS10973	10.3317	9.99319	10.4833	1	-0.0480557	0.0210133	0.069069	1	0	0	2	2379
NM_009454	Ube2e3	chr2_78707203-78711204	TSS10975	21.0882	22.6308	26.4481	1	0.101847	0.326714	0.224867	1	0	0	2	2425
NM_010576	Itga4	chr2_79093582-79097583	TSS10976	0.781812	0.764485	0.606084	1	-0.0322918	-0.36677	-0.334478	2	2	525	1	1100
NM_080558	Ssfa2	chr2_79473581-79477582	TSS10977	6.17048	7.86955	5.67814	1	0.350848	-0.119944	-0.470792	1	0	0	1	1550
NM_024181	Dnajc10	chr2_80153622-80157623	TSS10979	26.1069	35.0852	27.7605	1	0.426417	0.0885991	-0.337818	1	0	0	1	1000
NM_001195189	4930469G21Rik	chr1_163087445-163091446	TSS1098	0	0	0	1	0	0	0	1	0	0	1	250
NM_024438	Dusp19	chr2_80455370-80459371	TSS10980	6.0777	7.24945	5.90902	1	0.254308	-0.0405998	-0.294908	1	0	0	1	1275
NM_027091	Nup35	chr2_80476968-80480969	TSS10981	15.4828	14.7461	21.6106	1	-0.0703283	0.481046	0.551375	1	0	0	1	1700
NM_001190179	Nup35	chr2_80477420-80481421	TSS10982	0	0.484579	0	1	8.92356	0	-8.92356	1	0	0	1	1700
NM_175513	Zfp804a	chr2_81891814-81895815	TSS10983	0	0	0	1	0	0	0	2	2	1000	1	1475
NM_026934	Zc3h15	chr2_83482734-83486735	TSS10984	99.6309	88.2307	100.135	1	-0.175311	0.00728109	0.182592	1	0	0	2	1525
NM_008402	Itgav	chr2_83562553-83566554	TSS10985	7.61803	8.31035	7.86097	1	0.125475	0.0452835	-0.080192	1	0	0	1	1825
NM_175514	Fam171b	chr2_83650884-83654885	TSS10986	1.59603	1.88924	1.85335	1	0.243178	0.215522	-0.0276559	1	0	0	1	850
NM_007453	Prdx6	chr1_163179297-163183298	TSS1099	99.0239	82.5808	121.337	1	-0.261967	0.293168	0.555136	1	0	0	2	2275
NM_001145100	Gm13718	chr2_84497235-84501236	TSS10994	0.0887244	0.206243	0.325959	1	1.20775	1.86554	0.657786	1	0	0	1	275
NM_025885	Med19	chr2_84516558-84520559	TSS10995	19.2078	20.0234	21.4013	1	0.0599916	0.155998	0.0960068	1	0	0	2	1500
NM_001005342	Ypel4	chr2_84572360-84576361	TSS10996	0.936956	0.632129	1.73171	1	-0.567021	0.885438	1.45246	1	0	0	1	975
NM_019949	Ube2l6	chr2_84636984-84640985	TSS10997	5.64033	10.1542	6.93261	1	0.848111	0.297571	-0.55054	1	0	0	1	1050
NM_013899	Timm10	chr2_84665177-84669178	TSS10998	16.1358	15.8213	20.4516	1	-0.0283952	0.34193	0.370325	1	0	0	1	1675
NM_001081349	Slc43a1	chr2_84677564-84681565	TSS10999	3.13689	2.15755	1.17138	1	-0.539732	-1.42035	-0.880622	1	0	0	2	2150
NM_175236	Adhfe1	chr1_9536126-9540127	TSS11	0.951986	0.318195	0.499417	2	-1.57802	-0.929325	0.648692	1	0	0	2	1624
NM_011487	Stat4	chr1_52063087-52067088	TSS110	1.83868	1.50641	1.79094	1	-0.287383	-0.0379325	0.24945	1	0	0	1	1500
NM_010177	Fasl	chr1_163716626-163720627	TSS1100	0	0	0	1	0	0	0	1	0	0	1	100
NM_024497	Slc43a1	chr2_84678479-84682480	TSS11000	0.850898	0	1.80029	1	-9.73454	1.08028	10.8148	1	0	0	2	2150
NM_001083809	Slc43a1	chr2_84678782-84682783	TSS11001	0	1.86664	1.31649	1	10.867	10.3636	-0.503424	1	0	0	1	2050
NM_021398	Slc43a3	chr2_84774802-84778803	TSS11002	2.60536	3.16316	1.70153	1	0.279786	-0.614356	-0.894142	1	0	0	1	575
NM_182990	Ssrp1	chr2_84875357-84879358	TSS11005	96.5196	83.5665	91.2976	1	-0.207895	-0.0802441	0.127651	1	0	0	1	2150
NM_001136081	Ssrp1	chr2_84875607-84879608	TSS11006	21.7116	34.2529	34.5448	1	0.657736	0.669978	0.0122421	1	0	0	1	2150
NM_001081260	Tnks1bp1	chr2_84888616-84892617	TSS11007	8.38913	6.96557	7.13116	1	-0.268245	-0.234354	0.0338906	1	0	0	3	1459
NM_172645	AI848100	chr1_163804792-163808793	TSS1101	10.2525	13.393	10.6924	1	0.38547	0.0606042	-0.324866	1	0	0	2	2843
NM_172646	Dnm3	chr1_164406165-164410166	TSS1102	0.0948844	0.133308	0.0829927	4	0.486181	-0.191033	-0.677214	2	1	875	1	1350
NM_144877	Mettl13	chr1_164476476-164480477	TSS1103	10.1468	6.80868	9.85612	1	-0.575508	-0.0419289	0.533579	1	0	0	2	1299
NM_001081290	Prrc2c	chr1_164668687-164672688	TSS1105	43.7542	52.1567	40.0302	1	0.253426	-0.12833	-0.381755	1	0	0	1	1850
NM_021512	Nup160	chr2_90515371-90519372	TSS11087	26.1485	30.7119	28.5367	1	0.232061	0.126086	-0.105976	1	0	0	1	547
NM_018828	Fnbp4	chr2_90583526-90587527	TSS11088	25.9682	25.5371	22.8695	1	-0.0241504	-0.183314	-0.159163	1	0	0	3	2152
NM_178755	Agbl2	chr2_90620900-90624901	TSS11089	0.194778	0.205763	0.0910872	1	0.0787594	-1.08815	-1.16691	1	0	0	1	1125
NM_019758	Mtch2	chr2_90685311-90689312	TSS11090	61.2071	62.7377	61.8702	1	0.0356331	0.0155454	-0.0200876	1	0	0	1	1525
NM_026161	C1qtnf4	chr2_90723942-90727943	TSS11091	0.773531	0.751132	0.389401	1	-0.0423371	-0.988366	-0.946029	2	1	3193	1	825
NM_025991	Kbtbd4	chr2_90742942-90746943	TSS11092	5.87069	5.92001	6.65072	1	0.0120675	0.179952	0.167884	1	0	0	1	1075
NM_017368	Celf1	chr2_90778553-90782554	TSS11093	37.7556	50.584	40.9521	2	0.421981	0.117244	-0.304737	1	0	0	1	1425
NM_008948	Psmc3	chr2_90892172-90896173	TSS11095	90.0873	75.6898	84.7735	1	-0.251222	-0.0877094	0.163512	1	0	0	1	1750
NM_011355	Sfpi1	chr2_90934953-90938954	TSS11096	0.169758	0.26827	0.144181	1	0.6571	-0.234101	-0.891201	1	0	0	1	700
NM_007387	Acp2	chr2_91041068-91045069	TSS11098	3.9378	3.96261	3.90918	1	0.00905885	-0.0105211	-0.01958	1	0	0	1	1525
NR_015464	A330069E16Rik	chr2_91075302-91079303	TSS11099	6.13997	5.90403	7.03201	1	-0.0565222	0.195676	0.252198	1	0	0	1	1675
NM_009283	Stat1	chr1_52174281-52178282	TSS111	2.46851	2.48187	2.21383	1	0.00778392	-0.157029	-0.164813	1	0	0	1	1650
NM_030880	Pacsin3	chr2_91094969-91098970	TSS11100	5.97665	5.09822	6.16401	1	-0.229302	0.0445248	0.273827	2	1	300	1	2550
NM_028733	Pacsin3	chr2_91095485-91099486	TSS11101	2.40787	0.84369	0.37223	1	-1.51186	-2.69022	-1.17836	2	1	300	1	2550
NM_001166024	Arfgap2	chr2_91103271-91107272	TSS11102	16.8577	13.7055	16.8453	2	-0.298631	-0.0010641	0.297567	1	0	0	1	2000
NM_172668	Lrp4	chr2_91295687-91299688	TSS11103	4.50868	4.34898	3.02349	4	-0.0520143	-0.576333	-0.524319	1	0	0	1	2488
NR_027371	Arhgap1	chr2_91488274-91492275	TSS11106	10.2583	14.5292	13.5238	4	0.502123	0.398676	-0.103448	1	0	0	2	2550
NM_146124	Arhgap1	chr2_91491364-91495365	TSS11107	0.455418	0	0	1	-8.83421	-8.83421	0	1	0	0	1	61
NM_178724	Harbi1	chr2_91549106-91553107	TSS11108	8.54231	9.43139	8.36442	1	0.142828	-0.0303572	-0.173185	1	0	0	2	2925
NM_172669	Ambra1	chr2_91568294-91572295	TSS11109	12.8286	9.79477	11.2974	2	-0.389247	-0.183364	0.205883	1	0	0	1	950
NM_007699	Chrm4	chr2_91760345-91764346	TSS11110	0.942078	0.656686	0.5626	1	-0.519978	-0.742705	-0.222727	2	1	1800	1	2771
NM_001109691	Phf21a	chr2_92023639-92027640	TSS11111	13.4354	13.116	11.5636	5	-0.0347114	-0.216427	-0.181715	1	0	0	1	2936
NM_001109691	Phf21a	chr2_92023639-92027640	TSS11112	1.55553	3.00156	4.42204	2	0.947853	1.5067	0.558848	1	0	0	1	2936
NR_028114	Pex16	chr2_92212832-92216833	TSS11115	3.3207	2.61607	3.18433	1	-0.343969	-0.0604789	0.28349	1	0	0	3	2300
NM_145122	Pex16	chr2_92213395-92217396	TSS11116	3.14974	2.19715	1.94811	1	-0.519401	-0.692875	-0.173474	1	0	0	2	2125
NM_023850	Chst1	chr2_92437863-92441864	TSS11118	0.970482	0.480631	0.869398	1	-1.01226	-0.158512	0.853747	2	1	1850	2	1075
NM_030725	Syt13	chr2_92753257-92757258	TSS11119	4.49982	2.66244	2.77202	1	-0.756897	-0.69873	0.0581672	1	0	0	1	625
NM_011127	Prrx1	chr1_165241781-165245782	TSS1112	0.690835	0.217366	1.07038	3	-1.66368	0.630965	2.29464	2	1	3994	4	1425
NM_001025246	Trp53i11	chr2_93025740-93029741	TSS11120	11.9463	9.06793	8.10425	1	-0.39768	-0.559756	-0.162076	2	1	175	1	2150
NM_007442	Alx4	chr2_93480590-93484591	TSS11121	0.0920371	0.0844048	0.0859717	1	-0.123489	-0.0972601	0.0262289	2	2	3701	1	1250
NR_027831	2810002D19Rik	chr2_94244863-94248864	TSS11122	2.39521	1.85352	2.4165	1	-0.369709	0.0127615	0.38247	1	0	0	1	2300
NM_178725	Lrrc4c	chr2_97305830-97309831	TSS11123	0	0	0.0349975	1	0	5.16982	5.16982	2	1	100	1	1225
NM_009424	Traf6	chr2_101516596-101520597	TSS11125	4.97717	5.7266	5.2713	1	0.202315	0.082817	-0.119498	1	0	0	1	1425
NM_029635	Commd9	chr2_101724418-101728419	TSS11126	9.95151	10.4212	13.2456	1	0.0665275	0.41249	0.345962	1	0	0	1	725
NM_173749	Pamr1	chr2_102388177-102392178	TSS11127	0	0.111208	0.0988663	1	6.81003	6.64193	-0.168106	1	0	0	1	825
NM_001077514	Slc1a2	chr2_102496839-102500840	TSS11128	1.05e-06	0	1.1e-06	3	-0.00151404	7.20573e-05	0.00158609	2	3	1300	1	1500
NM_178883	Gorab	chr1_165331772-165335773	TSS1113	4.61974	3.79422	5.13223	1	-0.28394	0.151743	0.435683	1	0	0	1	1225
NM_019735	Apip	chr2_102911831-102915832	TSS11130	12.8571	7.8606	10.8771	1	-0.709783	-0.241251	0.468532	1	0	0	1	1225
NM_178890	Abtb2	chr2_103404466-103408467	TSS11133	0.961984	1.14389	0.985704	1	0.249625	0.0351055	-0.21452	2	1	1492	2	2350
NM_001142336	Lmo2	chr2_103807713-103811714	TSS11135	0	0	0	1	0	0	0	2	2	1789	1	1975
NM_008505	Lmo2	chr2_103808443-103812444	TSS11136	1.85677	0.791107	2.02504	2	-1.2298	0.125092	1.3549	2	2	2519	1	1975
NM_020593	Fbxo3	chr2_103865955-103869956	TSS11137	18.9488	16.8971	15.5582	2	-0.165321	-0.284414	-0.119093	1	0	0	1	1275
NM_181858	Cd59b	chr2_103909166-103913167	TSS11138	1.01706	1.88899	0.954099	1	0.892556	-0.0921004	-0.984656	1	0	0	2	975
NM_007652	Cd59a	chr2_103933957-103937958	TSS11139	3.32281	4.98721	2.50987	2	0.585684	-0.404651	-0.990335	1	0	0	1	925
NM_026634	A930018P22Rik	chr2_103960925-103964926	TSS11140	0.124141	0	0.0446359	1	-6.96741	-1.45531	5.5121	1	0	0	1	1000
NM_145529	Cstf3	chr2_104428640-104432641	TSS11141	22.6056	26.8649	24.7428	3	0.249034	0.130322	-0.118712	1	0	0	2	2600
NM_177600	Ccdc73	chr2_104724480-104728481	TSS11142	0.721542	0.629667	0.481036	1	-0.196203	-0.583941	-0.387738	1	0	0	1	600
NM_144783	Wt1	chr2_104964685-104968686	TSS11143	0.592176	0.362252	0.823398	1	-0.707489	0.474881	1.18237	2	5	2451	2	2625
NM_001159638	0610012H03Rik	chr2_105062498-105066499	TSS11144	0.414519	0.215716	0.280221	2	-0.939109	-0.56321	0.375899	1	0	0	1	850
NM_013627	Pax6	chr2_105514285-105518286	TSS11145	6.05235	3.1938	7.79901	1	-0.922008	0.365742	1.28775	2	2	1740	2	2575
NM_028260	Immp1l	chr2_105742794-105746795	TSS11146	22.1207	20.1137	22.1708	1	-0.137212	0.00326364	0.140476	1	0	0	1	1200
NM_001143683	Mpped2	chr2_106531615-106535616	TSS11147	2.63067	1.12782	2.34767	1	-1.22116	-0.164135	1.05703	1	0	0	1	2991
NM_029837	Mpped2	chr2_106533757-106537758	TSS11148	0	0	0.000377263	1	0	0.461804	0.461804	1	0	0	1	2418
NM_021275	Kcna4	chr2_107128745-107132746	TSS11149	0	0.0198531	0.0468526	1	4.38219	5.58053	1.19834	1	0	0	1	1175
NM_201364	BC055324	chr1_165922912-165926913	TSS1115	20.3448	26.312	20.2453	1	0.371045	-0.00707273	-0.378117	1	0	0	1	1500
NM_139303	Kif18a	chr2_109118894-109122895	TSS11150	14.6966	14.1611	11.9796	1	-0.0535454	-0.29488	-0.241335	1	0	0	1	1200
NM_007540	Bdnf	chr2_109512856-109516857	TSS11151	0	0.278112	0	1	8.1247	0	-8.1247	2	2	1575	2	2200
NM_001048139	Bdnf	chr2_109514053-109518054	TSS11152	0	0.0532505	0	1	5.76156	0	-5.76156	2	2	1575	3	2576
NM_001048141	Bdnf	chr2_109530592-109534593	TSS11153	0.000809247	0	0.157657	1	-0.855389	6.45438	7.30977	2	4	493	2	1843
NM_001048142	Bdnf	chr2_109531719-109535720	TSS11154	0.63328	0.418127	0.573248	1	-0.597732	-0.143446	0.454286	2	4	650	2	2675
NM_011699	Lin7c	chr2_109729034-109733035	TSS11155	48.7247	56.1813	52.0207	1	0.205433	0.0944306	-0.111002	1	0	0	1	1350
NM_172671	Lgr4	chr2_109755803-109759804	TSS11156	22.0376	24.7705	27.8363	1	0.168649	0.336987	0.168338	1	0	0	1	2779
NM_026613	Ccdc34	chr2_109855973-109859974	TSS11157	23.9722	25.4178	21.7717	1	0.0844734	-0.138902	-0.223376	1	0	0	1	1025
NM_001160208	Blzf1	chr1_166235615-166239616	TSS1116	8.21342	7.15039	7.88859	3	-0.199936	-0.0582085	0.141727	1	0	0	1	1525
NM_009721	Atp1b1	chr1_166386486-166390487	TSS1117	72.5666	66.6739	50.3188	1	-0.122182	-0.528199	-0.406018	1	0	0	1	3014
NM_207206	Lpcat4	chr2_112077997-112081998	TSS11176	11.2035	14.3224	12.9357	1	0.354296	0.207391	-0.146904	1	0	0	1	1825
NM_025403	Nop10	chr2_112100125-112104126	TSS11177	92.7459	114.612	165.048	1	0.3054	0.831523	0.526124	1	0	0	1	1475
NM_133649	Slc12a6	chr2_112104470-112108471	TSS11178	2.98335	2.2785	1.83648	1	-0.388699	-0.699688	-0.310989	1	0	0	2	1825
NM_133648	Slc12a6	chr2_112122844-112126845	TSS11179	5.56331	6.8378	4.91054	1	0.29754	-0.180027	-0.477568	1	0	0	1	600
NM_024254	2410042D21Rik	chr2_112217367-112221368	TSS11180	16.7777	17.1294	17.7494	1	0.0299279	0.0812206	0.0512927	1	0	0	4	2033
NM_133749	2900064A13Rik	chr2_112293181-112297182	TSS11181	23.7317	21.6706	22.2331	1	-0.131071	-0.0941022	0.0369683	1	0	0	1	1225
NM_028844	Aven	chr2_112331120-112335121	TSS11182	11.3996	8.74478	14.9762	1	-0.382451	0.393658	0.776109	1	0	0	2	1550
NM_001043322	Fmn1	chr2_113165892-113169893	TSS11185	0.789679	0.983773	0.698509	2	0.316699	-0.176749	-0.493449	2	1	50	1	950
NR_028423	A530058N18Rik	chr2_113837300-113841301	TSS11186	0	0	0	1	0	0	0	2	1	1800	1	1375
NM_001145898	BC052040	chr2_115405451-115409452	TSS11188	12.3745	11.3453	10.3964	2	-0.12526	-0.251264	-0.126004	1	0	0	2	1599
NM_026104	Tmco5	chr2_116702426-116706427	TSS11190	0	0	0	1	0	0	0	1	0	0	1	275
NM_033524	Spred1	chr2_116945185-116949186	TSS11191	21.6462	22.6779	24.9042	1	0.0671702	0.202267	0.135096	1	0	0	2	3440
NM_026620	Fam98b	chr2_117073474-117077475	TSS11193	32.4004	24.9176	25.4209	1	-0.378833	-0.349984	0.0288488	1	0	0	1	1125
NM_011580	Thbs1	chr2_117935657-117939658	TSS11194	0.889058	1.01666	1.8992	1	0.193284	1.09418	0.900896	1	0	0	3	1900
NM_013719	Eif2ak4	chr2_118212352-118216353	TSS11195	3.77656	6.73986	3.41438	1	0.835478	-0.145409	-0.980887	1	0	0	1	775
NM_001177806	Eif2ak4	chr2_118212847-118216848	TSS11196	2.77961	7.46794e-05	3.21872	1	-11.3373	0.211534	11.5488	1	0	0	1	775
NM_009773	Bub1b	chr2_118421946-118425947	TSS11197	64.4938	71.7594	68.8898	1	0.154005	0.0951285	-0.0588766	1	0	0	1	1275
NM_001033254	Pak6	chr2_118487312-118491313	TSS11198	0.0845534	0.120293	0	1	0.503599	-6.41875	-6.92235	1	0	0	1	1475
NM_001145854	Pak6	chr2_118500981-118504982	TSS11199	0.548048	1.05415	0.662928	1	0.942444	0.274095	-0.668349	2	2	2025	1	1175
NR_024590	Tmem194b	chr1_52685548-52689549	TSS112	9.90773	10.2022	8.95484	2	0.0422427	-0.145871	-0.188114	1	0	0	1	675
NM_145512	Sft2d2	chr1_167122564-167126565	TSS1120	11.4008	12.1637	13.2786	1	0.0934391	0.21995	0.126511	1	0	0	1	1425
NR_030716	5430417L22Rik	chr2_118569497-118573498	TSS11200	0.826638	0.653421	0.696962	1	-0.338781	-0.245851	0.0929294	2	3	2348	1	1825
NM_170593	Disp2	chr2_118603454-118607455	TSS11202	0	0.0067814	0.0231324	1	2.96003	4.5929	1.63287	1	0	0	1	850
NM_026412	D2Ertd750e	chr2_118637738-118641739	TSS11203	26.3071	24.2257	28.7403	1	-0.118909	0.127618	0.246527	1	0	0	2	1225
NM_019826	Ivd	chr2_118685735-118689736	TSS11204	10.7051	12.8497	12.6105	1	0.263414	0.236307	-0.0271071	1	0	0	1	750
NM_001045523	Bahd1	chr2_118725350-118729351	TSS11205	6.77683	5.73135	3.93085	1	-0.241697	-0.785615	-0.543918	2	3	2376	1	3125
NM_028117	Chst14	chr2_118750232-118754233	TSS11206	1.42704	1.92531	1.63879	1	0.431804	0.199475	-0.232329	1	0	0	1	1175
NM_173450	Rpusd2	chr2_118858525-118862526	TSS11207	6.59674	6.57533	5.79958	1	-0.00468923	-0.185775	-0.181086	1	0	0	1	1100
NM_029617	Casc5	chr2_118870854-118874855	TSS11208	10.3533	12.4487	7.73516	1	0.265881	-0.42054	-0.686421	1	0	0	1	1250
NM_011234	Rad51	chr2_118936552-118940553	TSS11209	45.8587	47.3647	55.5378	1	0.0466158	0.276269	0.229653	1	0	0	1	2075
NM_145513	Tiprl	chr1_167165089-167169090	TSS1121	11.3689	12.0132	11.7499	1	0.079521	0.0475517	-0.0319693	1	0	0	1	2275
NM_177157	Gchfr	chr2_118991523-118995524	TSS11210	5.81674	5.05411	4.48339	1	-0.202716	-0.375547	-0.172831	1	0	0	1	1375
NM_001164827	Zfyve19	chr2_119032455-119036456	TSS11212	2.85373	3.32045	2.65533	2	0.218459	-0.103918	-0.322377	1	0	0	1	1575
NM_016907	Spint1	chr2_119061095-119065096	TSS11213	19.4955	18.1733	16.671	1	-0.101315	-0.225788	-0.124473	1	0	0	1	2450
NM_172269	Vps18	chr2_119112477-119116478	TSS11214	13.4023	13.2229	11.5239	1	-0.0194405	-0.217834	-0.198393	1	0	0	1	1400
NM_019454	Dll4	chr2_119149519-119153520	TSS11215	0.113369	0.045416	0.0821884	1	-1.301	-0.459242	0.84176	2	3	3451	1	3550
NM_026929	Chac1	chr2_119174977-119178978	TSS11216	7.69158	5.52667	7.89669	1	-0.476796	0.0379632	0.514759	1	0	0	2	2628
NM_019769	1500003O03Rik	chr2_119371442-119375443	TSS11217	19.4549	16.1874	21.4097	1	-0.265247	0.138124	0.403372	1	0	0	1	1425
NR_015473	1700020I14Rik	chr2_119418031-119422032	TSS11218	14.0758	17.463	13.5694	2	0.311065	-0.052854	-0.363919	1	0	0	1	925
NM_133851	Nusap1	chr2_119442033-119446034	TSS11219	38.5842	41.8955	34.9406	2	0.118783	-0.143102	-0.261885	1	0	0	3	1725
NM_028759	Dcaf6	chr1_167388594-167392595	TSS1122	4.58016	6.94344	4.33189	1	0.600145	-0.0803833	-0.680529	1	0	0	1	2800
NM_030112	Rtf1	chr2_119498803-119502804	TSS11220	21.2942	20.9934	22.6841	1	-0.0205237	0.0912167	0.11174	1	0	0	1	1600
NM_146125	Itpka	chr2_119566072-119570073	TSS11221	3.16292	1.94282	2.16031	1	-0.702818	-0.549807	0.153011	2	1	1748	2	2723
NM_019392	Tyro3	chr2_119623249-119627250	TSS11222	22.25	19.3071	19.6889	1	-0.204664	-0.176414	0.0282496	1	0	0	1	2100
NM_001164274	Mga	chr2_119720963-119724964	TSS11223	21.432	25.9638	18.0787	2	0.276723	-0.245461	-0.522184	1	0	0	1	1775
NM_011941	Mapkbp1	chr2_119796434-119800435	TSS11224	3.3667	3.60275	2.87118	1	0.0977353	-0.229617	-0.327353	1	0	0	1	900
NM_001114637	Jmjd7	chr2_119851218-119855219	TSS11225	8.97792	7.71817	7.10941	1	-0.218096	-0.336609	-0.118513	1	0	0	1	1450
NM_172672	Ganc	chr2_120227631-120231632	TSS11227	1.20542	1.26321	1.22125	1	0.0675039	0.0188072	-0.0486967	1	0	0	2	1850
NM_001109761	Capn3	chr2_120300644-120304645	TSS11229	0.646912	0.447123	0.229714	1	-0.531903	-1.48969	-0.957789	1	0	0	1	1275
NM_001001880	Mpzl1	chr1_167562672-167566673	TSS1123	30.7985	22.1045	26.3565	2	-0.478502	-0.224693	0.253809	1	0	0	1	2000
NM_009222	Snap23	chr2_120391406-120395407	TSS11230	25.2381	28.7525	28.5393	3	0.188076	0.177344	-0.0107326	1	0	0	1	1025
NM_025475	Haus2	chr2_120433171-120437172	TSS11231	10.5798	11.742	11.347	1	0.150352	0.100989	-0.049363	1	0	0	1	1650
NM_175285	Tmem62	chr2_120800797-120804798	TSS11232	0.219056	0.548461	0.474331	1	1.32015	1.11106	-0.209085	1	0	0	1	1100
NM_010761	Ccndbp1	chr2_120832143-120836144	TSS11233	9.04494	9.97752	10.8354	1	0.141555	0.260543	0.118988	1	0	0	1	1200
NM_029475	Adal	chr2_120965876-120969877	TSS11234	3.56164	4.41915	4.24634	1	0.311149	0.253613	-0.0575357	1	0	0	2	799
NM_153387	Tubgcp4	chr2_120994941-120998942	TSS11235	8.00811	10.3655	7.4685	1	0.372215	-0.10063	-0.472845	1	0	0	3	1750
NM_032393	Mtap1a	chr2_121113337-121117338	TSS11236	0.651242	0.523627	0.493367	1	-0.314115	-0.399825	-0.0857096	1	0	0	1	1475
NM_001173506	Mtap1a	chr2_121119189-121123190	TSS11237	2.40115	2.05365	2.5814	1	-0.225434	0.104386	0.32982	1	0	0	1	3050
NM_009897	Ckmt1	chr2_121182376-121186377	TSS11238	7.82795	7.46432	7.6033	1	-0.0686147	-0.0420034	0.0266113	1	0	0	1	1700
NM_007952	Pdia3	chr2_121237637-121241638	TSS11239	174.962	218.999	181.119	1	0.323881	0.049896	-0.273985	1	0	0	1	1900
NM_178593	Rcsd1	chr1_167636225-167640226	TSS1124	0.209138	0.4164	0.260465	2	0.990093	0.315278	-0.674815	2	2	600	1	1000
NM_011354	Serf2	chr2_121272963-121276964	TSS11240	64.7322	66.3694	70.004	1	0.0360341	0.112952	0.076918	1	0	0	2	2075
NM_026318	2310003F16Rik	chr2_121280823-121284824	TSS11241	140.474	131.961	171.054	1	-0.0901909	0.284147	0.374338	1	0	0	1	1300
NM_030234	Wdr76	chr2_121330458-121334459	TSS11242	14.1237	15.0642	13.1215	1	0.0929996	-0.106178	-0.199177	1	0	0	2	1425
NM_177054	Casc4	chr2_121690705-121694706	TSS11243	18.7112	20.1599	19.7189	2	0.107583	0.0756753	-0.0319078	1	0	0	1	1975
NM_212450	Ctdspl2	chr2_121780188-121784189	TSS11244	15.906	18.871	14.6847	1	0.246586	-0.11525	-0.361835	1	0	0	4	1914
NM_144545	Eif3j	chr2_121852358-121856359	TSS11245	76.3418	99.328	94.6802	1	0.379723	0.310586	-0.069137	1	0	0	1	1975
NM_009735	B2m	chr2_121971422-121975423	TSS11246	43.9253	40.8838	26.1723	1	-0.10352	-0.746989	-0.643469	2	2	675	1	1150
NM_028914	4933406J08Rik	chr2_122010007-122014008	TSS11248	1.02977	0.701625	0.398724	1	-0.552896	-1.36665	-0.813751	1	0	0	1	450
NM_146126	Sord	chr2_122058574-122062575	TSS11249	32.8699	36.2086	23.9352	1	0.139561	-0.457617	-0.597178	1	0	0	1	1400
NM_025777	Duoxa2	chr2_122122635-122126636	TSS11250	0	0.0285488	0.0321726	1	4.88503	5.05192	0.166893	2	2	3350	2	1075
NM_001099297	Duox1	chr2_122139407-122143408	TSS11251	0	0.0577367	0.0523257	1	5.87619	5.73676	-0.139431	2	1	843	1	418
NM_001004174	AA467197	chr2_122461622-122465623	TSS11254	1.71291	2.37336	1.59901	1	0.470247	-0.0992104	-0.569458	2	1	75	1	400
NR_030547	Mir147	chr2_122464538-122468539	TSS11255	0	0.857279	0	1	9.7453	0	-9.7453	-1	1	75	0	0
NM_019788	Pldn	chr2_122562240-122566241	TSS11256	8.75611	9.63874	7.94173	1	0.138539	-0.14082	-0.279359	1	0	0	1	1000
NM_001162503	Sqrdl	chr2_122589094-122593095	TSS11257	2.12316e-05	0.639316	0.82066	1	9.29233	9.65209	0.359757	2	1	75	1	775
NM_198932	Pou2f1	chr1_167930765-167934766	TSS1126	4.1952	6.08551	2.63358	2	0.536532	-0.67151	-1.20804	1	0	0	1	3210
NM_199241	Sema6d	chr2_124434031-124438032	TSS11260	0.335846	0.489706	0.316838	5	0.542768	-0.0837996	-0.626568	2	3	675	1	1500
NM_175034	Slc24a5	chr2_124891862-124895863	TSS11261	1.33195	1.93707	1.34849	1	0.539998	0.0177916	-0.522206	1	0	0	1	50
NM_001162934	Ctxn2	chr2_124960427-124964428	TSS11262	0.0500054	0	0	1	-5.67258	-5.67258	0	1	0	0	1	725
NM_001079690	Slc12a1	chr2_124976335-124980336	TSS11263	0	0	0	2	0	0	0	1	0	0	1	250
NM_001159646	Dut	chr2_125070983-125074984	TSS11264	12.9591	41.1945	44.0556	1	1.66841	1.76528	0.0968714	1	0	0	2	2100
NM_023595	Dut	chr2_125071250-125075251	TSS11265	37.5694	22.8072	34.8041	1	-0.720044	-0.110298	0.609746	1	0	0	2	2100
NM_025613	Eid1	chr2_125496835-125500836	TSS11266	5.76388	5.87965	8.69268	1	0.0286851	0.592676	0.563991	1	0	0	1	1075
NM_175154	Galk2	chr2_125682953-125686954	TSS11267	8.36399	9.21863	7.81338	1	0.140345	-0.0982324	-0.238577	1	0	0	1	1150
NM_026981	Dtwd1	chr2_125975876-125979877	TSS11269	7.0098	7.5686	6.83235	1	0.110638	-0.0369861	-0.147624	1	0	0	1	800
NM_001160049	Dusp27	chr1_168056029-168060030	TSS1127	5.68551	2.60641	2.27312	2	-1.12492	-1.32223	-0.197311	1	0	0	1	2250
NM_011978	Slc27a2	chr2_126376759-126380760	TSS11270	5.61245	4.90482	6.0661	1	-0.194393	0.112119	0.306513	1	0	0	2	2050
NM_019729	Usp8	chr2_126531063-126535064	TSS11271	24.1874	26.0954	22.8725	1	0.109535	-0.0806382	-0.190174	1	0	0	1	925
NM_175550	Ap4e1	chr2_126832446-126836447	TSS11272	6.43329	7.15748	6.12526	1	0.153872	-0.0707744	-0.224647	1	0	0	1	950
NM_026678	Blvra	chr2_126894392-126898393	TSS11273	3.57418	3.89446	3.13697	1	0.123778	-0.188184	-0.311962	1	0	0	1	1325
NM_177214	Snrnp200	chr2_127032139-127036140	TSS11274	58.9979	61.0953	53.3497	1	0.050397	-0.145181	-0.195578	1	0	0	1	1975
NM_175145	Tmem127	chr2_127071710-127075711	TSS11275	7.78735	6.74857	6.15025	1	-0.206522	-0.340438	-0.133916	1	0	0	1	2075
NM_139308	Stard7	chr2_127093964-127097965	TSS11276	22.5394	22.6967	23.3803	1	0.010033	0.052842	0.042809	1	0	0	1	1950
NM_010090	Dusp2	chr2_127159894-127163895	TSS11277	0.232161	0.313134	0.65091	1	0.430054	1.48335	1.05329	1	0	0	2	1425
NM_172539	Astl	chr2_127162374-127166375	TSS11278	0	0.0184747	0.0217763	1	4.28353	4.50946	0.225932	1	0	0	1	326
NM_009633	Adra2b	chr2_127187021-127191022	TSS11279	0.627486	0.476372	0.497332	1	-0.396767	-0.334773	0.0619933	2	1	2000	2	1750
NM_175296	Mael	chr1_168166875-168170876	TSS1128	4.24471	2.61663	1.71627	1	-0.697745	-1.30589	-0.608144	1	0	0	1	675
NM_001081089	Gpat2	chr2_127248934-127252935	TSS11280	2.31706	1.94192	0.384942	1	-0.254691	-2.58646	-2.33177	1	0	0	1	550
NM_029963	Mrps5	chr2_127411161-127415162	TSS11281	47.341	52.7657	47.8375	1	0.156507	0.0150515	-0.141456	1	0	0	2	2175
NM_009754	Bcl2l11	chr2_127949773-127953774	TSS11283	9.32064	8.74203	11.459	3	-0.0924504	0.297948	0.390398	2	1	77	1	4001
NM_008587	Mertk	chr2_128522732-128526733	TSS11284	2.2315	2.8235	1.88742	1	0.339335	-0.241481	-0.580816	1	0	0	2	1700
NM_028248	Tmem87b	chr2_128642038-128646039	TSS11285	10.2433	11.5876	7.75042	1	0.177885	-0.402289	-0.580174	1	0	0	1	1825
NM_024237	Fbln7	chr2_128687667-128691668	TSS11286	0.533614	0.203141	0.138955	1	-1.38893	-1.93353	-0.544603	1	0	0	1	875
NM_178404	Zc3h6	chr2_128791137-128795138	TSS11287	2.38142	2.36855	2.52189	1	-0.00781467	0.0826495	0.0904642	1	0	0	1	1550
NM_027192	Ttl	chr2_128889682-128893683	TSS11288	3.64173	3.3721	4.09736	1	-0.110945	0.170027	0.280972	1	0	0	1	1775
NM_009086	Polr1b	chr2_128924731-128928732	TSS11289	21.1747	23.0342	27.0529	1	0.12143	0.353427	0.231996	1	0	0	1	1550
NM_175170	Pogk	chr1_168337959-168341960	TSS1129	0.855124	0.732979	0.571196	2	-0.222081	-0.58131	-0.359229	2	3	2200	1	1050
NM_025395	Chchd5	chr2_128953435-128957436	TSS11290	8.92208	8.60307	9.67028	1	-0.0525225	0.116165	0.168688	1	0	0	1	2525
NM_015747	Slc20a1	chr2_129022508-129026509	TSS11291	77.861	88.209	84.6517	2	0.180023	0.120638	-0.0593855	1	0	0	1	2600
NM_001177646	Sirpa	chr2_129416574-129420575	TSS11293	2.14001	0.370458	1.60371	3	-2.52702	-0.415976	2.11104	1	0	0	1	2100
NM_001177647	Sirpa	chr2_129416930-129420931	TSS11294	1.15839	1.75395	1.67136	2	0.598057	0.528516	-0.0695403	1	0	0	1	2100
NM_183262	Stk35	chr2_129624252-129628253	TSS11295	10.6484	11.281	10.8846	2	0.0832509	0.0316462	-0.0516047	1	0	0	1	2603
NM_009374	Tgm3	chr2_129836109-129840110	TSS11296	0.288802	0.285484	0.30543	1	-0.016613	0.08049	0.097103	1	0	0	1	300
NM_001033197	AU015228	chr2_129924129-129928130	TSS11297	0.745265	0.70518	0.684051	1	-0.0796521	-0.123477	-0.0438246	1	0	0	1	150
NM_146108	Hibch	chr1_52899889-52903890	TSS113	10.8854	9.49979	10	1	-0.196408	-0.122383	0.0740249	1	0	0	1	950
NM_024193	Nop56	chr2_130098147-130102148	TSS11300	183.882	176.472	179.154	1	-0.0593406	-0.0375798	0.0217608	1	0	0	2	2948
NR_028547	Snord110	chr2_130099250-130103251	TSS11301	0	7.12667	4.15977	1	12.7992	12.0226	-0.77658	1	0	0	1	4001
NR_028528	Snord57	chr2_130101761-130105762	TSS11302	10.6371	18.6216	14.1884	1	0.807814	0.415573	-0.392241	1	0	0	2	1964
NM_001110513	Ebf4	chr2_130119674-130123675	TSS11303	1.16656	1.19121	0.509748	1	0.0301417	-1.19281	-1.22295	2	2	3226	1	1900
NM_030559	Vps16	chr2_130248055-130252056	TSS11306	30.3102	25.5515	25.1373	1	-0.246387	-0.269964	-0.0235774	1	0	0	2	1900
NM_001163688	Ptpra	chr2_130274013-130278014	TSS11307	14.5534	14.119	13.5555	2	-0.0437153	-0.102471	-0.0587553	1	0	0	1	1550
NM_207207	Mrps26	chr2_130387492-130391493	TSS11308	15.9304	12.7423	18.1423	1	-0.322134	0.187564	0.509698	1	0	0	1	1525
NM_011025	Oxt	chr2_130399908-130403909	TSS11309	0.0820681	0	0.185761	1	-6.37622	1.16883	7.54505	2	1	1475	1	1000
NM_025922	Itpa	chr2_130491576-130495577	TSS11310	33.8666	34.7644	40.7041	1	0.0377464	0.265304	0.227557	1	0	0	2	1650
NM_009730	Atrn	chr2_130730231-130734232	TSS11311	1.57202	2.18629	1.7225	1	0.475607	0.131804	-0.343803	1	0	0	1	1700
NM_028306	Hspa12b	chr2_130951147-130955148	TSS11312	0.444319	0.474778	0.535273	1	0.0954494	0.268128	0.172679	1	0	0	1	850
NM_001111075	Cdc25b	chr2_131010683-131014684	TSS11313	8.88509	7.68939	10.2764	2	-0.208492	0.209852	0.418344	1	0	0	1	1575
NM_027129	2310035K24Rik	chr2_131034175-131038176	TSS11314	3.08282	2.63822	2.44854	1	-0.224607	-0.332208	-0.107601	1	0	0	1	1575
NM_144888	Mavs	chr2_131057798-131061799	TSS11315	6.25479	5.63941	5.52569	1	-0.149392	-0.178776	-0.0293843	1	0	0	1	1650
NM_153501	Pank2	chr2_131086235-131090236	TSS11316	17.519	19.531	19.4883	1	0.156837	0.153679	-0.00315741	1	0	0	2	2075
NM_001177833	Smox	chr2_131315597-131319598	TSS11318	5.72607	5.52441	5.94058	9	-0.0517169	0.0530498	0.104767	1	0	0	1	1725
NM_011170	Prnp	chr2_131733663-131737664	TSS11319	10.4145	10.0044	7.10591	1	-0.0579533	-0.551438	-0.493485	1	0	0	1	750
NM_023043	Prnd	chr2_131774596-131778597	TSS11320	0.586271	0.183077	0.593755	2	-1.67372	0.0182691	1.69199	1	0	0	1	100
NM_138651	Cds2	chr2_132086992-132090993	TSS11321	23.4571	21.4076	19.8054	1	-0.131896	-0.244119	-0.112224	1	0	0	1	1950
NM_028637	1110034G24Rik	chr2_132514018-132518019	TSS11324	3.8579	3.35823	3.90024	1	-0.200059	0.0157431	0.215802	1	0	0	2	600
NM_007694	Chgb	chr2_132605013-132609014	TSS11325	0.202042	0.105807	0.052873	1	-0.926772	-1.91414	-0.987372	1	0	0	1	850
NM_025676	Mcm8	chr2_132640070-132644071	TSS11326	15.4352	13.1437	10.8609	1	-0.231836	-0.507041	-0.275205	1	0	0	2	2050
NM_001024385	Crls1	chr2_132670401-132674402	TSS11327	4.41647	6.11722	5.81653	1	0.469892	0.397186	-0.0727052	1	0	0	1	1650
NM_025646	Crls1	chr2_132671469-132675470	TSS11328	12.1244	8.89882	11.2204	1	-0.446184	-0.11178	0.334405	1	0	0	1	1650
NM_007553	Bmp2	chr2_133376934-133380935	TSS11329	0.760271	1.10004	0.977817	1	0.532385	0.362629	-0.169756	2	3	2550	2	2350
NM_030724	Uck2	chr1_169213258-169217259	TSS1133	89.1754	83.4659	89.0005	1	-0.0954578	-0.00283231	0.0926255	1	0	0	1	2542
NM_001145830	Plcb1	chr2_134609899-134613900	TSS11330	0.287021	0.252848	0.273809	2	-0.182211	-0.0677442	0.114466	2	1	425	1	1200
NM_029530	6330527O06Rik	chr2_135881662-135885663	TSS11332	0.0546655	0	0.026976	1	-5.79871	-0.992594	4.80612	2	3	1463	1	1625
NM_175667	Ankrd5	chr2_136356056-136360057	TSS11333	0.0346148	0.0578209	0.0345786	1	0.723852	-0.00146715	-0.725319	1	0	0	1	450
NM_011428	Snap25	chr2_136537185-136541186	TSS11334	0.935743	0.928262	1.18139	1	-0.0115679	0.335981	0.347549	1	0	0	2	1325
NM_028201	2210009G21Rik	chr2_136714953-136718954	TSS11335	0	0	0	1	0	0	0	1	0	0	2	1200
NM_028834	2210009G21Rik	chr2_136715998-136719999	TSS11336	3.81068	0.60983	0.669082	3	-2.64158	-2.50802	0.133567	1	0	0	2	1200
NM_001025431	Btbd3	chr2_138080319-138084320	TSS11338	4.73867	5.89953	5.62579	1	0.316058	0.247526	-0.0685324	1	0	0	2	1300
NM_145534	Btbd3	chr2_138102228-138106229	TSS11339	0.278113	0.140435	0.174859	1	-0.98071	-0.66643	0.31428	1	0	0	1	875
NM_025569	Mgst3	chr1_169321928-169325929	TSS1134	9.76353	10.2551	13.0227	1	0.0708597	0.415517	0.344657	1	0	0	1	1825
NM_001126490	Ism1	chr2_139501913-139505914	TSS11342	0.168223	0.147402	0.141768	1	-0.189415	-0.245253	-0.0558379	2	1	650	1	2150
NM_027093	2310003L22Rik	chr2_139994381-139998382	TSS11343	5.7098	5.26891	5.28644	1	-0.115915	-0.111123	0.00479106	1	0	0	1	1950
NM_001013802	Macrod2	chr2_140219165-140223166	TSS11344	2.58393	2.30923	3.02061	2	-0.162088	0.225194	0.387282	1	0	0	2	1275
NM_021335	Snrpb2	chr2_142886804-142890805	TSS11345	71.0581	62.0305	63.7774	1	-0.196018	-0.155952	0.0400669	1	0	0	1	950
NM_008792	Pcsk2	chr2_143369868-143373869	TSS11347	0.0666787	0.0770969	0.165934	1	0.206563	1.3025	1.09594	2	1	844	1	2944
NM_019771	Dstn	chr2_143739066-143743067	TSS11348	124.686	146.794	143.571	1	0.235492	0.203463	-0.0320284	1	0	0	3	2867
NM_028984	8430406I07Rik	chr2_144094770-144098771	TSS11350	14.9398	12.2728	15.0164	1	-0.283675	0.00737766	0.291053	1	0	0	3	2550
NM_181417	Csrp2bp	chr2_144192770-144196771	TSS11351	26.1547	30.6077	26.2846	3	0.226815	0.0071441	-0.219671	1	0	0	1	1550
NR_033459	Zfp133-ps	chr2_144283015-144287016	TSS11352	0.312891	1.18516	0.100298	1	1.91796	-1.63166	-3.54962	1	0	0	1	925
NM_029763	Polr3f	chr2_144351480-144355481	TSS11353	6.79743	7.9778	7.9586	1	0.23097	0.227494	-0.00347585	1	0	0	1	1650
NM_019787	Sec23b	chr2_144379964-144383965	TSS11354	32.9557	36.5863	32.625	1	0.150771	-0.0145497	-0.165321	1	0	0	1	1075
NM_001033297	Gm561	chr2_144417800-144421801	TSS11355	3.40043	5.86035	6.69438	1	0.785092	0.977025	0.191933	1	0	0	3	1100
NM_025314	Dtd1	chr2_144423688-144427689	TSS11356	23.1553	15.9484	19.1181	1	-0.537903	-0.27639	0.261512	1	0	0	1	850
NM_008783	Pbx1	chr1_170360389-170364390	TSS1136	5.81831	3.60772	6.14221	2	-0.68936	0.0781439	0.767504	1	0	0	2	1700
NM_028724	Rin2	chr2_145609851-145613852	TSS11360	3.77483	3.30023	4.33166	1	-0.19379	0.198459	0.392249	1	0	0	1	825
NM_001141965	Naa20	chr2_145726976-145730977	TSS11361	45.62	48.6002	54.4109	2	0.091293	0.254225	0.162932	1	0	0	1	1600
NM_175280	4930529M08Rik	chr2_145758519-145762520	TSS11362	0.10339	0.173031	0.240131	1	0.737361	1.20783	0.470473	1	0	0	2	1175
NM_016889	Insm1	chr2_146045732-146049733	TSS11363	2.19953	1.86113	2.45748	1	-0.240897	0.159916	0.400813	2	4	2251	1	3300
NM_001033298	Plk1s1	chr2_146679624-146683625	TSS11364	6.04088	6.55631	4.11587	1	0.118107	-0.55345	-0.671556	1	0	0	1	900
NM_011917	Xrn2	chr2_146836795-146840796	TSS11365	36.9435	41.5217	35.3733	1	0.168541	-0.062658	-0.231199	1	0	0	3	2105
NR_030769	Nkx2-2as	chr2_147007818-147011819	TSS11366	0	0.043237	0	1	5.46718	0	-5.46718	2	3	3451	3	1319
NM_008780	Pax1	chr2_147188729-147192730	TSS11367	0.0207385	0.0541172	0.217121	1	1.34225	3.3268	1.98455	2	2	3751	1	1225
NM_009219	Sstr4	chr2_148219112-148223113	TSS11368	0.111085	0.0696085	0.0768616	1	-0.666679	-0.525609	0.14107	2	2	1625	1	1450
NM_019761	Nxt1	chr2_148496350-148500351	TSS11369	23.8098	28.0005	30.294	2	0.233887	0.347465	0.113578	1	0	0	1	1775
NM_023284	Nuf2	chr1_171459595-171463596	TSS1137	19.9049	20.9474	21.9608	1	0.073644	0.1418	0.0681562	1	0	0	2	1150
NM_028986	Gzf1	chr2_148504855-148508856	TSS11370	10.5285	11.6967	11.2853	1	0.151788	0.100136	-0.0516523	1	0	0	2	1650
NM_177655	Cstl1	chr2_148574096-148578097	TSS11371	0	0	0	1	0	0	0	1	0	0	1	122
NM_001085521	Tmem90b	chr2_149654518-149658519	TSS11378	0.538906	0.247849	0.644833	1	-1.11744	0.258453	1.37589	2	1	900	1	2550
NM_001145863	Gm14139	chr2_150005490-150009491	TSS11379	4.93893	3.74168	3.26056	1	-0.400419	-0.598928	-0.19851	1	0	0	2	950
NM_009062	Rgs4	chr1_171675773-171679774	TSS1138	0.067349	0.0362002	0.0456925	1	-0.87761	-0.549729	0.32788	1	0	0	1	175
NM_001142411	Zfp937	chr2_150041834-150045835	TSS11380	5.68127	4.96438	4.02941	1	-0.194563	-0.495541	-0.300978	1	0	0	1	650
NM_001142410	Gm14124	chr2_150081252-150085253	TSS11381	3.83645	4.05699	3.25719	1	0.0806174	-0.236077	-0.316695	1	0	0	2	575
NM_172117	Entpd6	chr2_150572816-150576817	TSS11383	16.5411	14.7624	17.2859	1	-0.164117	0.0635368	0.227654	1	0	0	1	825
NM_153781	Pygb	chr2_150610531-150614532	TSS11384	12.7781	12.3808	13.4325	1	-0.0455652	0.072049	0.117614	1	0	0	1	1550
NM_027014	Gins1	chr2_150733329-150737330	TSS11385	30.6551	24.5507	31.0064	2	-0.320351	0.0164374	0.336788	1	0	0	1	925
NM_198326	Nsfl1c	chr2_151318043-151322044	TSS11387	87.0772	74.3299	82.5484	1	-0.22835	-0.0770539	0.151296	1	0	0	1	800
NM_008019	Fkbp1a	chr2_151366234-151370235	TSS11388	136.536	149.438	163.639	1	0.130265	0.261233	0.130969	1	0	0	1	2600
NM_010476	Hsd17b7	chr1_171897336-171901337	TSS1139	3.3957	4.88275	5.40379	1	0.523856	0.670105	0.146249	1	0	0	2	1125
NM_001160363	5430405G05Rik	chr2_151525743-151529744	TSS11390	0.262648	0.408061	0.214272	1	0.633703	-0.292452	-0.926155	2	1	1169	1	1600
NM_001040689	Rspo4	chr2_151666662-151670663	TSS11391	0.800365	0.443001	0.207039	1	-0.851897	-1.94561	-1.09371	1	0	0	1	1000
NM_009641	Angpt4	chr2_151735067-151739068	TSS11392	0.0249358	0.0215731	0.0257856	1	-0.20034	0.0465127	0.246853	1	0	0	1	275
NM_027172	Slc52a3	chr2_151820246-151824247	TSS11393	3.44475e-05	4.53553e-05	1.15373	3	0.0151329	10.1245	10.1093	1	0	0	2	354
NM_001164819	Slc52a3	chr2_151823601-151827602	TSS11394	0.965218	0.640577	0.00217078	2	-0.590726	-8.25137	-7.66064	1	0	0	1	650
NM_001160410	Scrt2	chr2_151905264-151909265	TSS11395	0.0678917	0.0431267	0.0483268	1	-0.642678	-0.481958	0.16072	2	2	1200	1	1975
NM_029688	Srxn1	chr2_151929465-151933466	TSS11396	22.6978	20.3089	30.0671	1	-0.160433	0.405618	0.566051	1	0	0	1	1900
NM_009328	Tcf15	chr2_151967344-151971345	TSS11397	12.8339	17.017	26.5565	1	0.406989	1.04905	0.642058	1	0	0	1	3670
NM_007788	Csnk2a1	chr2_152050575-152054576	TSS11398	105.599	113.421	100.089	1	0.103091	-0.077312	-0.180403	1	0	0	2	1700
NM_024196	Tbc1d20	chr2_152117607-152121608	TSS11399	9.25989	10.3078	10.29	1	0.154654	0.15216	-0.00249323	1	0	0	1	1475
NR_033505	Gm14164	chr2_152169404-152173405	TSS11400	0.615546	0.228516	0.346165	1	-1.42561	-0.828587	0.597027	1	0	0	2	1971
NM_177656	6820408C15Rik	chr2_152239322-152243323	TSS11401	0.521048	0.264913	0.396099	1	-0.973228	-0.394684	0.578544	1	0	0	1	2178
NM_009047	Rem1	chr2_152450743-152454744	TSS11406	0.0482615	0.124083	0.123098	1	1.34435	1.33295	-0.0114059	2	2	2075	1	1175
NM_001159553	H13	chr2_152493196-152497197	TSS11407	8.30258	8.81639	8.30434	4	0.0866181	0.000306799	-0.0863113	1	0	0	1	2122
NM_025543	Mcts2	chr2_152510883-152514884	TSS11408	9.40495	9.63233	12.4444	1	0.0344609	0.403967	0.369506	1	0	0	2	2450
NM_010495	Id1	chr2_152560009-152564010	TSS11409	4.04649	7.66604	8.64266	1	0.921642	1.09461	0.172973	1	0	0	2	3085
NM_133806	Uap1	chr1_172103077-172107078	TSS1141	20.0738	19.7039	17.5455	1	-0.0268312	-0.194202	-0.167371	1	0	0	1	1475
NM_053091	Cox4i2	chr2_152577908-152581909	TSS11410	0.457684	0.432489	0.426221	1	-0.0815052	-0.102518	-0.0210128	1	0	0	1	975
NM_001141978	Tpx2	chr2_152671699-152675700	TSS11411	51.3875	54.8836	53.9929	5	0.0949547	0.0713503	-0.0236044	1	0	0	2	1225
NM_001083618	Ttll9	chr2_152786220-152790221	TSS11413	0.267861	0.403758	0.220475	2	0.590199	-0.279715	-0.869914	1	0	0	1	700
NM_001011732	Xkr7	chr2_152855587-152859588	TSS11414	0.191612	0.207254	0.291942	1	0.112647	0.604917	0.492271	2	1	50	1	1850
NM_145536	BC020535	chr2_152889737-152893738	TSS11415	0	0.0132821	0.0589534	1	3.83614	5.90577	2.06963	1	0	0	1	350
NM_001172117	Hck	chr2_152932203-152936204	TSS11416	3.66607	3.25201	1.04449	1	-0.172853	-1.81045	-1.6376	1	0	0	1	2475
NM_133847	Tm9sf4	chr2_152985036-152989037	TSS11417	22.6461	21.3406	19.5608	1	-0.085658	-0.211287	-0.125629	1	0	0	1	1600
NM_080463	Pofut1	chr2_153065267-153069268	TSS11418	4.9688	4.58704	4.98557	1	-0.11531	0.00486001	0.12017	1	0	0	1	2650
NM_008444	Kif3b	chr2_153115151-153119152	TSS11419	4.72666	5.16308	3.41579	1	0.127385	-0.468485	-0.59587	1	0	0	1	1425
NM_010633	Uhmk1	chr1_172143524-172147525	TSS1142	3.81194	6.94766	3.56662	1	0.865831	-0.0959419	-0.961773	1	0	0	1	800
NM_001039939	Asxl1	chr2_153169874-153173875	TSS11420	27.9078	28.2366	28.6499	1	0.0168974	0.0378604	0.020963	1	0	0	1	2500
NM_001122997	Dnmt3b	chr2_153473189-153477190	TSS11421	92.4153	117.019	132.294	7	0.34054	0.517537	0.176997	1	0	0	1	2640
NM_007896	Mapre1	chr2_153565022-153569023	TSS11422	32.6549	35.0527	36.067	1	0.102223	0.143376	0.0411527	1	0	0	1	1925
NR_036629	Efcab8	chr2_153604614-153608615	TSS11423	0	0.101194	0.0933053	1	6.67517	6.55927	-0.1159	1	0	0	1	650
NM_001109985	Nos1ap	chr1_172517980-172521981	TSS1143	1.3573	0.887177	1.37217	3	-0.612888	0.0157017	0.62859	2	1	450	1	1350
NM_144890	Bpifb5	chr2_154047477-154051478	TSS11435	0.205718	0.0246052	0.18099	1	-3.01316	-0.183805	2.82935	1	0	0	1	750
NM_172860	Cbfa2t2	chr2_154260219-154264220	TSS11438	16.4652	17.0609	15.4664	2	0.0512715	-0.0902768	-0.141548	1	0	0	3	1700
NM_029305	1700003F12Rik	chr2_154372639-154376640	TSS11439	1.97194	2.8331	1.75498	1	0.522544	-0.168071	-0.690614	1	0	0	1	875
NM_001171640	1700007I08Rik	chr2_154375511-154379512	TSS11440	0.258819	0.231504	0.183559	1	-0.160251	-0.493425	-0.333173	1	0	0	2	1764
NM_199304	Zfp341	chr2_154437103-154441104	TSS11441	3.71722	3.1365	3.23522	1	-0.244997	-0.200302	0.0446942	1	0	0	1	2604
NM_029362	Chmp4b	chr2_154480761-154484762	TSS11442	51.6465	46.6863	47.4254	1	-0.145668	-0.123008	0.0226602	1	0	0	2	1439
NM_001139511	Raly	chr2_154614845-154618846	TSS11443	140.04	136.484	150.666	4	-0.0370995	0.105514	0.142614	1	0	0	4	2475
NM_008395	Itch	chr2_154957216-154961217	TSS11445	12.3678	14.5125	10.982	1	0.23069	-0.171433	-0.402123	1	0	0	1	1150
NM_025947	Dynlrb1	chr2_155060268-155064269	TSS11446	54.7452	56.3508	64.7731	1	0.0417029	0.242658	0.200955	1	0	0	1	1875
NM_025735	Map1lc3a	chr2_155100099-155104100	TSS11447	18.8315	11.5207	19.6885	1	-0.708871	0.0642019	0.773073	1	0	0	1	1625
NR_030475	Mir695	chr2_155180552-155184553	TSS11448	0	0	0	1	0	0	0	1	0	0	1	1275
NM_178111	Trp53inp2	chr2_155205591-155209592	TSS11449	7.23995	6.89376	8.35773	1	-0.0706787	0.207105	0.277783	1	0	0	1	1475
NM_001081304	Atf6	chr1_172795902-172799903	TSS1145	7.14873	9.3538	5.94726	1	0.387818	-0.265421	-0.653239	1	0	0	2	1475
NM_019811	Acss2	chr2_155341778-155345779	TSS11450	5.32999	5.92602	6.68198	1	0.152903	0.326088	0.173185	1	0	0	1	1325
NM_001085378	Myh7b	chr2_155434947-155438948	TSS11451	3.83397	3.42068	1.13666	1	-0.16451	-1.75315	-1.58864	1	0	0	1	498
NM_011171	Procr	chr2_155574952-155578953	TSS11453	2.12779	2.14657	2.48096	1	0.0126715	0.221446	0.208775	1	0	0	2	903
NM_010808	Mmp24	chr2_155599079-155603080	TSS11454	0.31708	0.71451	0.408271	1	1.16958	0.363667	-0.805915	2	2	1575	1	1350
NM_001130000	Cep250	chr2_155780293-155784294	TSS11455	10.8977	9.13405	7.59697	6	-0.254674	-0.520474	-0.2658	1	0	0	1	1150
NM_025516	Ergic3	chr2_155831860-155835861	TSS11456	45.1715	44.3258	47.6775	1	-0.0272655	0.0778941	0.10516	1	0	0	1	1700
NM_139151	Spag4	chr2_155888948-155892949	TSS11457	1.29501	0.631609	1.0243	1	-1.03469	-0.338031	0.69666	1	0	0	1	1400
NM_001164215	Romo1	chr2_155967970-155971971	TSS11458	28.7733	31.0738	46.3387	4	0.110966	0.687468	0.576503	1	0	0	1	1500
NM_001164215	Romo1	chr2_155967970-155971971	TSS11459	0.375981	0	1.20225	1	-8.55835	1.67437	10.2327	1	0	0	1	1500
NM_023173	Dusp12	chr1_172813671-172817672	TSS1146	13.2453	16.0926	14.2365	1	0.280898	0.104106	-0.176791	1	0	0	1	1150
NM_172674	Phf20	chr2_156020382-156024383	TSS11460	23.6172	22.2803	19.471	1	-0.0840656	-0.278498	-0.194432	1	0	0	1	2533
NM_027585	4921517L17Rik	chr2_156136208-156140209	TSS11461	1.33851	0.805915	1.02453	1	-0.731217	-0.385336	0.345881	1	0	0	1	1400
NM_013510	Epb4.1l1	chr2_156244787-156248788	TSS11462	5.25778	4.46106	3.59029	2	-0.237017	-0.550228	-0.313211	1	0	0	2	2325
NM_001006664	Epb4.1l1	chr2_156299572-156303573	TSS11463	0.513773	0.437419	1.19603	1	-0.231626	1.21745	1.44908	1	0	0	1	1400
NM_026661	0610011L14Rik	chr2_156371311-156375312	TSS11464	6.54193	6.33063	7.76941	2	-0.0473599	0.248054	0.295414	1	0	0	1	1475
NM_146128	Dlgap4	chr2_156437440-156441441	TSS11465	4.73328	3.90823	3.79061	1	-0.276261	-0.320334	-0.0440739	2	1	300	1	2550
NM_001042488	Dlgap4	chr2_156544720-156548721	TSS11466	4.90472	4.62468	6.94847	1	-0.0847994	0.502438	0.587237	1	0	0	1	2850
NM_001042487	Dlgap4	chr2_156545014-156549015	TSS11467	2.12385	1.67135	1.40916	1	-0.345484	-0.591502	-0.246018	1	0	0	1	2850
NM_172118	Myl9	chr2_156599199-156603200	TSS11468	1.69621	2.11551	2.54251	1	0.318522	0.583656	0.265133	1	0	0	1	1350
NM_173396	Tgif2	chr2_156663812-156667813	TSS11469	19.0904	18.1821	21.9362	1	-0.0703247	0.200456	0.270781	1	0	0	2	3388
NM_026124	1110008F13Rik	chr2_156686857-156690858	TSS11470	51.928	54.1326	68.717	1	0.0599839	0.404148	0.344164	1	0	0	1	2650
NM_019642	Rpn2	chr2_157102833-157106834	TSS11472	91.7412	96.4229	91.6368	1	0.0718053	-0.00164268	-0.073448	1	0	0	2	2050
NM_026968	Manbal	chr2_157191329-157195330	TSS11473	14.5379	15.731	19.1109	1	0.113784	0.394553	0.280769	1	0	0	1	1675
NM_001025395	Src	chr2_157248028-157252029	TSS11474	15.4564	15.9535	15.4796	2	0.04566	0.00216306	-0.043497	1	0	0	1	2075
NM_180960	Nnat	chr2_157383845-157387846	TSS11475	9.28868	7.7083	15.984	2	-0.269029	0.783022	1.05205	1	0	0	4	2171
NM_025680	Ctnnbl1	chr2_157561136-157565137	TSS11476	30.5598	22.9062	28.7655	1	-0.415881	-0.0872926	0.328589	1	0	0	1	1250
NM_198627	Vstm2l	chr2_157738388-157742389	TSS11477	1.55341	0.771189	1.82442	1	-1.00934	0.231861	1.2412	2	3	2000	1	1200
NM_027434	Rprd1b	chr2_157852529-157856530	TSS11478	9.89033	8.8972	10.1021	1	-0.152651	0.0305616	0.183213	1	0	0	1	2675
NM_177850	Bpi	chr2_158081976-158085977	TSS11480	0	0.0238688	0.0569412	1	4.63626	5.85652	1.22025	1	0	0	1	900
NM_175692	Snhg11	chr2_158199373-158203374	TSS11482	24.2944	22.1592	18.1911	1	-0.132712	-0.417371	-0.284659	1	0	0	1	1625
NM_177658	Ralgapb	chr2_158233588-158237589	TSS11483	8.91221	9.75817	7.4799	1	0.130813	-0.252733	-0.383547	1	0	0	1	1925
NM_001145015	Arhgap40	chr2_158336531-158340532	TSS11485	0.0182962	0.0451404	0.0186743	1	1.25771	0.0279955	-1.22972	1	0	0	1	369
NM_009508	Slc32a1	chr2_158434493-158438494	TSS11486	0.177509	0.148297	0.32305	1	-0.257812	0.86022	1.11803	2	2	3594	3	1700
NM_175419	Actr5	chr2_158448648-158452649	TSS11487	7.94786	7.25922	7.48892	1	-0.130735	-0.0857977	0.044937	1	0	0	1	1100
NM_153089	Ppp1r16b	chr2_158490468-158494469	TSS11488	1.47394	1.36777	1.25334	1	-0.107776	-0.233728	-0.125952	2	1	1294	1	1769
NM_001159662	Ppp1r16b	chr2_158490870-158494871	TSS11489	5.69962e-05	7.8204e-05	5.52715e-05	1	0.02866	-0.00235597	-0.0310159	2	1	1696	1	2000
NM_010187	Fcgr2b	chr1_172904202-172908203	TSS1149	0.035194	0.0146533	0.219134	2	-1.20929	2.60456	3.81384	1	0	0	1	578
NM_027975	Fam83d	chr2_158591834-158595835	TSS11490	12.1085	14.7773	15.6142	1	0.287341	0.366812	0.0794707	1	0	0	2	1875
NM_145742	Dhx35	chr2_158618555-158622556	TSS11491	9.35539	9.09121	9.99895	1	-0.041321	0.0959689	0.13729	1	0	0	1	1650
NM_009408	Top1	chr2_160469632-160473633	TSS11492	84.819	83.5246	92.0004	1	-0.022186	0.117251	0.139437	1	0	0	1	1675
NM_021280	Plcg1	chr2_160555045-160559046	TSS11493	21.3282	21.8183	22.6922	1	0.032775	0.0894302	0.0566552	1	0	0	2	2200
NR_033569	9430021M05Rik	chr2_162484898-162488899	TSS11495	0.208403	0	0.185342	1	-7.71014	-0.168329	7.54181	2	2	2300	2	1600
NM_026499	Srsf6	chr2_162755243-162759244	TSS11496	93.0068	101.998	125.394	1	0.133131	0.431056	0.297925	1	0	0	3	2851
NM_001081338	L3mbtl1	chr2_162767200-162771201	TSS11497	0.239049	0.298778	0.328052	1	0.320566	0.454987	0.134421	1	0	0	1	1300
NM_172150	Ift52	chr2_162841207-162845208	TSS11499	21.6567	17.8125	16.7934	1	-0.281909	-0.3669	-0.0849908	1	0	0	2	1200
NM_145517	Ormdl1	chr1_53351938-53355939	TSS115	13.0528	13.5413	13.4817	1	0.0530029	0.0466396	-0.00636335	1	0	0	1	925
NM_008652	Mybl2	chr2_162878370-162882371	TSS11500	243.058	178.188	182.891	1	-0.447898	-0.410315	0.0375837	1	0	0	2	3176
NM_144891	Gdap1l1	chr2_163262202-163266203	TSS11502	1.57423	1.49708	1.18345	1	-0.0724478	-0.411345	-0.338897	1	0	0	1	1025
NR_028122	2310001K24Rik	chr2_163296280-163300281	TSS11503	0.144126	2.19879	0.810761	1	3.92199	2.48375	-1.43824	1	0	0	1	1425
NM_001099331	R3hdml	chr2_163316053-163320054	TSS11504	0	0.151345	0	1	7.2512	0	-7.2512	1	0	0	3	1950
NM_181734	Ttpal	chr2_163426049-163430050	TSS11506	1.8725	1.8787	2.13395	2	0.00476933	0.188468	0.183699	1	0	0	1	850
NR_028113	0610039K10Rik	chr2_163468585-163472586	TSS11507	0	0.0429381	0.189853	1	5.4574	7.57632	2.11892	1	0	0	1	1175
NM_001039390	Pkig	chr2_163482121-163486122	TSS11508	8.49315	8.55136	10.1329	4	0.00985283	0.254644	0.244791	1	0	0	1	1000
NM_025321	Sdhc	chr1_173078734-173082735	TSS1151	61.0172	54.2953	62.0595	1	-0.168386	0.0244357	0.192821	1	0	0	1	1425
NM_001030292	Kcnk15	chr2_163677485-163681486	TSS11511	0	0	0	1	0	0	0	2	2	2175	1	850
NM_018753	Ywhab	chr2_163818932-163822933	TSS11512	67.3344	67.1106	78.966	1	-0.00480301	0.229885	0.234688	1	0	0	1	1725
NM_001114079	Pabpc1l	chr2_163849185-163853186	TSS11513	0.48521	0.239577	0.118786	1	-1.01508	-2.02112	-1.00604	1	0	0	1	275
NM_021420	Stk4	chr2_163897913-163901914	TSS11514	17.0221	19.3606	17.3421	1	0.185704	0.026868	-0.158836	1	0	0	1	1425
NM_009036	Rbpjl	chr2_164226693-164230694	TSS11518	0.160442	0.251768	0.0343179	1	0.646798	-2.19254	-2.83934	2	4	2201	1	800
NM_025575	Sys1	chr2_164284470-164288471	TSS11519	13.2966	11.7022	14.1999	1	-0.184263	0.0948165	0.279079	1	0	0	1	1175
NM_025557	Pcp4l1	chr1_173124399-173128400	TSS1152	0.196688	0.263433	0.31398	1	0.419677	0.672035	0.252358	1	0	0	1	850
NM_001048227	Dbndd2	chr2_164309639-164313640	TSS11520	0	0.357759	0	1	8.48687	0	-8.48687	2	1	575	1	1550
NM_026797	Dbndd2	chr2_164309954-164313955	TSS11521	0.394303	0.184618	0.361602	1	-1.09062	-0.124572	0.96605	2	1	575	1	1550
NM_001048228	Dbndd2	chr2_164310376-164314377	TSS11522	0.109406	8.88698e-06	0	1	-6.77391	-6.78667	-0.0127646	2	1	575	1	1550
NM_001048229	Dbndd2	chr2_164311610-164315611	TSS11523	0	6.76563e-06	0	1	0.00972787	0	-0.00972787	2	1	215	1	1265
NM_133779	Pigt	chr2_164321024-164325025	TSS11524	31.2639	23.2551	27.3981	1	-0.426935	-0.190415	0.236519	1	0	0	1	1300
NM_026323	Wfdc2	chr2_164386215-164390216	TSS11525	32.7432	36.6832	37.415	1	0.163919	0.192416	0.0284965	1	0	0	1	1825
NM_001039501	Wfdc10	chr2_164479545-164483546	TSS11527	0.265605	0.0735737	0.178979	1	-1.83797	-0.566875	1.27109	1	0	0	2	500
NM_001037170	Tomm40l	chr1_173150645-173154646	TSS1153	7.52148	5.77402	8.74818	1	-0.381382	0.217939	0.599322	1	0	0	1	1950
NM_001040055	Gm14316	chr2_164538804-164542805	TSS11530	0	0	0	1	0	0	0	0	0	0	0	0
NM_133763	Dnttip1	chr2_164569514-164573515	TSS11531	13.5321	14.7191	18.7857	1	0.121295	0.473219	0.351924	1	0	0	1	1600
NM_026785	Ube2c	chr2_164593428-164597429	TSS11532	116.306	133.439	161.096	1	0.198253	0.469992	0.271738	1	0	0	2	3451
NM_133924	Snx21	chr2_164609520-164613521	TSS11533	3.40089	2.41981	2.15192	1	-0.490847	-0.660042	-0.169195	1	0	0	1	1475
NM_178375	Zswim3	chr2_164628613-164632614	TSS11534	5.43114	5.20017	4.76965	1	-0.0626845	-0.187335	-0.12465	1	0	0	1	3000
NM_028028	Zswim1	chr2_164646185-164650186	TSS11535	11.4664	11.4658	12.8564	1	-7.5487e-05	0.165061	0.165136	1	0	0	3	2936
NM_001038492	Ctsa	chr2_164656372-164660373	TSS11536	45.8735	49.141	35.5659	2	0.0992641	-0.367157	-0.466421	1	0	0	1	2448
NM_146129	Pcif1	chr2_164702867-164706868	TSS11537	14.4123	10.5112	16.3731	1	-0.455336	0.184015	0.639351	1	0	0	1	2825
NM_013599	Mmp9	chr2_164771750-164775751	TSS11538	1.32783	0.715399	1.84242	1	-0.891321	0.472228	1.36355	2	1	1676	1	1051
NM_020333	Slc12a5	chr2_164791487-164795488	TSS11539	0.710283	0.528032	0.709981	1	-0.427069	-0.000612677	0.426456	2	2	2838	1	1200
NM_010185	Fcer1g	chr1_173162480-173166481	TSS1154	0.316394	0.144179	0.246559	1	-1.12844	-0.358502	0.76994	1	0	0	1	175
NM_170704	Cd40	chr2_164879135-164883136	TSS11540	2.62283	1.26549	2.02439	5	-1.05084	-0.373478	0.677366	1	0	0	1	850
NM_130451	Slc2a10	chr2_165327477-165331478	TSS11541	0.0133216	0.0759442	0.157349	1	2.42562	3.46684	1.04122	1	0	0	1	750
NM_010165	Eya2	chr2_165478797-165482798	TSS11542	0.0936703	0.135642	0.110821	1	0.529417	0.240207	-0.28921	1	0	0	1	300
NM_008679	Ncoa3	chr2_165816136-165820137	TSS11543	22.6272	26.8712	23.0183	1	0.247993	0.0247221	-0.22327	1	0	0	2	2275
NM_023815	Trp53rk	chr2_166617266-166621267	TSS11546	2.24077	1.63761	2.19937	1	-0.452166	-0.0268921	0.425274	1	0	0	1	1600
NM_001085495	Arfgef2	chr2_166629080-166633081	TSS11547	10.7091	12.5265	10.4579	1	0.226127	-0.0342408	-0.260367	1	0	0	1	1225
NM_023565	Cse1l	chr2_166729595-166733596	TSS11548	71.1685	94.6113	86.9294	1	0.410769	0.288602	-0.122167	1	0	0	2	2075
NM_153065	Ddx27	chr2_166838812-166842813	TSS11549	40.3512	39.4793	46.0625	1	-0.0315144	0.190977	0.222491	1	0	0	1	2125
NM_153064	Ndufs2	chr1_173175243-173179244	TSS1155	91.1196	81.9026	91.0126	1	-0.15385	-0.00169511	0.152155	1	0	0	1	2225
NM_001081005	1500012F01Rik	chr2_166886433-166890434	TSS11550	50.8795	62.4874	51.6901	1	0.296476	0.0228031	-0.273672	1	0	0	1	3484
NR_028540	Snord12	chr2_166888792-166892793	TSS11551	34.3637	43.5711	45.3503	1	0.342477	0.400217	0.0577393	1	0	0	2	3058
NM_178371	Slc9a8	chr2_167245220-167249221	TSS11552	9.84638	7.50758	8.23353	2	-0.391199	-0.258054	0.133145	1	0	0	1	3096
NM_030743	Rnf114	chr2_167316144-167320145	TSS11553	24.3456	20.8991	21.3858	1	-0.22021	-0.187	0.0332108	1	0	0	1	2000
NM_011427	Snai1	chr2_167361726-167365727	TSS11554	3.64077	3.13188	2.49951	1	-0.21715	-0.542417	-0.325267	2	2	900	2	1927
NM_009883	Cebpb	chr2_167512414-167516415	TSS11555	8.80666	6.86309	8.96361	1	-0.35969	0.025482	0.385172	1	0	0	1	3215
NR_015500	A530013C23Rik	chr2_167514707-167518708	TSS11556	0.00474222	0.0184178	0	1	1.7577	-2.52161	-4.27931	1	0	0	1	2143
NM_011201	Ptpn1	chr2_167755826-167759827	TSS11557	8.53673	7.6889	8.95719	1	-0.150888	0.0693547	0.220242	1	0	0	1	1875
NM_021409	Pard6b	chr2_167904503-167908504	TSS11558	13.9525	17.391	15.7258	1	0.317797	0.172598	-0.145199	1	0	0	1	2875
NM_001160330	Mocs3	chr2_168054121-168058122	TSS11559	3.41306	2.7357	3.53109	1	-0.319051	0.0490337	0.368085	1	0	0	2	2950
NM_008911	Ppox	chr1_173209317-173213318	TSS1156	7.63658	5.33514	5.4041	1	-0.517319	-0.498794	0.0185248	1	0	0	1	1950
NM_080455	Tshz2	chr2_169457145-169461146	TSS11560	0.0172354	0.034038	0.0259867	1	0.942179	0.565507	-0.376672	2	4	475	1	1050
NM_001013369	Pfdn4	chr2_170319927-170323928	TSS11561	12.8496	18.5061	17.8361	1	0.526243	0.473045	-0.0531978	2	1	3400	2	1825
NM_001110152	Pfdn4	chr2_170334729-170338730	TSS11562	9.22683	7.46331	6.68982	1	-0.305983	-0.463808	-0.157826	1	0	0	2	1575
NM_029761	Dok5	chr2_170555306-170559307	TSS11563	2.37355	1.4564	1.1873	2	-0.704255	-0.998751	-0.294495	2	1	175	1	1725
NM_025912	2010011I20Rik	chr2_172169076-172173077	TSS11565	2.12429	1.852	2.23	1	-0.197797	0.0700308	0.267828	1	0	0	2	1275
NM_024199	Cstf1	chr2_172194502-172198503	TSS11566	28.8153	28.5613	32.6385	1	-0.0127729	0.179734	0.192507	1	0	0	2	3128
NM_001080820	Cass4	chr2_172217402-172221403	TSS11567	0.729768	0.388368	0.590528	3	-0.908279	-0.304966	0.603312	1	0	0	2	1600
NM_001080820	Cass4	chr2_172217402-172221403	TSS11568	0.075045	0	0.339013	1	-6.24878	2.16066	8.40945	1	0	0	2	1600
NM_025542	2410001C21Rik	chr2_172264077-172268078	TSS11569	27.0595	22.9957	24.9205	1	-0.234762	-0.118798	0.115964	1	0	0	1	1800
NM_013919	Usp21	chr1_173216092-173220093	TSS1157	14.9551	12.2089	16.0458	1	-0.292683	0.101552	0.394234	1	0	0	1	1950
NM_009335	Tfap2c	chr2_172373092-172377093	TSS11571	17.7627	12.1156	17.7903	1	-0.551947	0.00223982	0.554187	2	2	2183	2	3751
NM_001159696	Tfap2c	chr2_172374490-172378491	TSS11572	6.67344	4.82156	0.711966	1	-0.468848	-3.22674	-2.75789	2	2	785	2	3285
NM_012046	Spo11	chr2_172803342-172807343	TSS11573	0	0	0	3	0	0	0	1	0	0	1	275
NM_175112	Rae1	chr2_172823617-172827618	TSS11574	59.5713	55.2568	60.6671	1	-0.108464	0.0262965	0.13476	1	0	0	1	2050
NM_019547	Rbm38	chr2_172845402-172849403	TSS11575	22.279	23.6407	28.2205	1	0.0855845	0.341045	0.255461	1	0	0	2	2473
NM_028158	1700021F07Rik	chr2_173346092-173350093	TSS11577	0	0	0	1	0	0	0	0	0	0	0	0
NM_024436	Rab22a	chr2_173483345-173487346	TSS11578	13.4195	13.2991	13.1242	1	-0.0130013	-0.032099	-0.0190977	1	0	0	1	2175
NM_019806	Vapb	chr2_173561071-173565072	TSS11579	15.1306	12.3763	12.7914	1	-0.289868	-0.242278	0.0475903	1	0	0	1	1300
NM_025388	Ufc1	chr1_173223113-173227114	TSS1158	46.3256	33.5272	46.3545	1	-0.466466	0.000899718	0.467365	1	0	0	1	1225
NM_001102425	Stx16	chr2_173900551-173904552	TSS11580	23.3798	21.7183	20.1755	4	-0.106344	-0.212648	-0.106304	1	0	0	2	2874
NM_213733	Npepl1	chr2_173933851-173937852	TSS11581	10.7011	12.0332	10.9503	1	0.169246	0.0332082	-0.136038	1	0	0	1	1525
NM_022000	Gnas	chr2_174107820-174111821	TSS11582	11.4487	8.51598	8.8934	3	-0.426891	-0.364336	0.0625553	1	0	0	2	2746
NM_201618	Gnas	chr2_174121359-174125360	TSS11583	0.188774	0.250286	0.0629867	3	0.405046	-1.56844	-1.97349	2	3	1700	3	3376
NR_003258	Gnas	chr2_174151414-174155415	TSS11584	107.266	86.1051	100.067	2	-0.317018	-0.10022	0.216799	2	2	2275	1	3115
NM_001077510	Gnas	chr2_174153589-174157590	TSS11585	79.7135	80.7727	70.2844	2	0.0190435	-0.181617	-0.200661	2	1	761	1	3311
NM_020580	Th1l	chr2_174239304-174243305	TSS11586	36.6687	34.6992	35.82	1	-0.0796445	-0.0337829	0.0458616	1	0	0	1	1125
NM_001099328	Zfp831	chr2_174467034-174471035	TSS11588	0.019903	0.0273837	0.00488265	1	0.441353	-1.82917	-2.27052	2	1	150	1	1175
NM_007903	Edn3	chr2_174584273-174588274	TSS11589	0.24923	0.324835	0.136649	1	0.380887	-0.862261	-1.24315	2	2	200	1	750
NM_012049	Nit1	chr1_173273776-173277777	TSS1159	11.7766	13.0288	10.6589	1	0.145769	-0.143852	-0.289621	1	0	0	2	1975
NM_001177568	Gm14420	chr2_177247446-177251447	TSS11598	12.1442	10.7629	10.104	1	-0.174185	-0.265317	-0.0911316	1	0	0	1	525
NR_036450	Gm14403	chr2_177280930-177284931	TSS11599	6.2788	6.23898	5.37448	1	-0.00917721	-0.224325	-0.215148	1	0	0	1	500
NM_028091	Osgepl1	chr1_53368506-53372507	TSS116	4.45016	5.43278	4.24316	1	0.287775	-0.0687023	-0.356477	1	0	0	1	650
NM_001033039	Klhdc9	chr1_173288929-173292930	TSS1160	0.836522	1.04393	0.993776	1	0.319207	0.248245	-0.0709627	1	0	0	2	1575
NM_001177399	Etohi1	chr2_177755988-177759989	TSS11600	9.7301	11.032	6.68183	2	0.181145	-0.542144	-0.723289	1	0	0	1	650
NM_001177790	Phactr3	chr2_177851679-177855680	TSS11601	0.230406	0	0	2	-7.85428	-7.85428	0	1	0	0	1	1050
NM_028806	Phactr3	chr2_177874637-177878638	TSS11602	0	0	0	2	0	0	0	1	0	0	2	975
NM_001177791	Phactr3	chr2_177908053-177912054	TSS11603	0	0.237653	0.000168633	2	7.89877	0.224822	-7.67395	1	0	0	1	325
NM_001081289	9030418K01Rik	chr2_178147238-178151239	TSS11605	0.57355	0.63015	0.448868	1	0.13555	-0.352931	-0.488481	2	1	300	1	1575
NM_009867	Cdh4	chr2_179175182-179179183	TSS11607	0.814708	0.545924	1.00808	1	-0.576712	0.306916	0.883628	2	3	1158	1	1875
NR_033782	4921531C22Rik	chr2_179709557-179713558	TSS11608	0.586213	0.337726	0.643098	1	-0.793765	0.133396	0.927161	1	0	0	2	2618
NM_177727	Lsm14b	chr2_179757691-179761692	TSS11609	30.3167	30.4142	28.6051	1	0.00463218	-0.0838375	-0.0884697	1	0	0	1	2225
NM_178750	Ss18l1	chr2_179775187-179779188	TSS11610	2.12992	1.94262	1.8115	1	-0.13273	-0.233495	-0.100765	1	0	0	1	3125
NM_181424	Gtpbp5	chr2_179803297-179807298	TSS11611	8.02695	6.43859	7.222	4	-0.318063	-0.152434	0.165629	1	0	0	1	1700
NM_144500	Osbpl2	chr2_179852070-179856071	TSS11612	6.71263	5.71354	5.09577	1	-0.232456	-0.39751	-0.165054	1	0	0	2	2000
NM_019822	Adrm1	chr2_179904292-179908293	TSS11613	73.6127	64.1461	75.0824	1	-0.19859	0.0285197	0.22711	1	0	0	1	2768
NM_025587	Rps21	chr2_179990083-179994084	TSS11614	808.767	616.09	825.485	1	-0.392582	0.0295178	0.4221	1	0	0	1	4001
NR_029528	Mir1a-1	chr2_180121752-180125753	TSS11615	0	0	0	1	0	0	0	0	0	0	0	0
NM_018766	Ntsr1	chr2_180232680-180236681	TSS11618	0	0	0	1	0	0	0	2	1	2500	1	1000
NM_028479	1600027N09Rik	chr2_180314008-180318009	TSS11619	11.4649	10.6747	11.0782	1	-0.103019	-0.0494959	0.053523	1	0	0	1	659
NM_031373	Ogfr	chr2_180322111-180326112	TSS11620	13.063	11.1527	12.381	1	-0.228074	-0.0773523	0.150722	1	0	0	1	1500
NM_009936	Col9a3	chr2_180330926-180334927	TSS11621	2.90201	1.46818	1.65141	1	-0.982538	-0.812978	0.169561	2	1	25	1	875
NM_029607	2310003C23Rik	chr2_180445250-180449251	TSS11622	16.9743	18.5452	17.5787	1	0.127687	0.0504734	-0.0772132	1	0	0	2	1400
NM_183161	Slc17a9	chr2_180458043-180462044	TSS11623	7.05438	5.60035	3.14911	1	-0.332949	-1.16332	-0.830372	1	0	0	1	2719
NR_029538	Mir124a-3	chr2_180626744-180630745	TSS11624	0	0	0	1	0	0	0	2	1	2806	2	2381
NM_145760	Arfgap1	chr2_180699929-180703930	TSS11626	21.5448	17.9891	18.1825	11	-0.260206	-0.244777	0.015429	1	0	0	1	1350
NM_025598	Ppdpf	chr2_180920047-180924048	TSS11628	53.8372	43.0201	47.5295	1	-0.323586	-0.179777	0.143809	1	0	0	1	2673
NM_199312	BC051628	chr2_180952720-180956721	TSS11629	0	0.0228828	0	1	4.5779	0	-4.5779	1	0	0	1	875
NM_001166668	Rtel1	chr2_181052428-181056429	TSS11630	9.99812	7.58034	9.59441	11	-0.399349	-0.0594566	0.339892	1	0	0	1	1675
NR_030710	Rtel1	chr2_181053510-181057511	TSS11631	4.00114	4.45755	4.0878	1	0.155803	0.0309059	-0.124897	1	0	0	2	2000
NM_144894	Zgpat	chr2_181097635-181101636	TSS11632	2.9307	3.15208	2.10003	1	0.105024	-0.480641	-0.585665	1	0	0	1	2700
NM_001048148	Zgpat	chr2_181098127-181102128	TSS11633	4.68948	3.84974	4.26788	1	-0.2846	-0.135878	0.148722	1	0	0	1	2700
NM_183181	Abhd16b	chr2_181225910-181229911	TSS11635	0.0575192	0.0260963	0	1	-1.11081	-5.87084	-4.76002	1	0	0	2	1300
NM_025482	Tpd52l2	chr2_181229957-181233958	TSS11636	31.6536	33.5359	34.1652	1	0.0833342	0.110155	0.0268205	1	0	0	1	2000
NM_016775	Dnajc5	chr2_181253209-181257210	TSS11637	25.3659	29.5379	25.0348	1	0.219669	-0.0189547	-0.238624	1	0	0	4	1950
NR_027289	Gm16119	chr2_181311184-181315185	TSS11638	0.426964	0.546984	1.0151	3	0.356644	1.24748	0.890838	1	0	0	1	10
NR_027290	Gm16119	chr2_181312236-181316237	TSS11639	0.201145	0.418477	0	2	1.0532	-7.65925	-8.71245	1	0	0	1	1062
NM_033509	Vangl2	chr1_173955399-173959400	TSS1164	8.33568	8.10584	7.67926	1	-0.0403333	-0.118318	-0.0779845	1	0	0	1	1775
NM_133701	Prpf6	chr2_181334023-181338024	TSS11640	42.1948	38.1858	39.7267	1	-0.144025	-0.0869541	0.0570712	1	0	0	2	1602
NM_009326	Tcea2	chr2_181413014-181417015	TSS11641	2.83709	2.08183	3.55565	1	-0.446375	0.325599	0.771974	1	0	0	1	1675
NM_011012	Oprl1	chr2_181447720-181451721	TSS11642	0.281244	0.130895	0.106954	1	-1.09755	-1.38653	-0.288973	1	0	0	1	425
NM_153594	Pcmtd2	chr2_181570607-181574608	TSS11646	13.1999	10.5744	9.53007	1	-0.319924	-0.469926	-0.150002	1	0	0	1	1150
NM_025901	Polr3k	chr2_181597064-181601065	TSS11647	12.3272	11.6318	10.5566	1	-0.0837638	-0.22368	-0.139916	1	0	0	1	1500
NM_001013376	Rpp38	chr2_3247900-3251901	TSS11648	10.716	10.3903	8.32158	1	-0.044525	-0.364798	-0.320273	1	0	0	2	1725
NM_010916	Nhlh1	chr1_173985727-173989728	TSS1165	0	0	0	1	0	0	0	1	0	0	1	50
NM_008579	Meig1	chr2_3337920-3341921	TSS11650	0.0641924	0	0	1	-6.02663	-6.02663	0	1	0	0	1	821
NR_027509	Suv39h2	chr2_3390258-3394259	TSS11651	13.6503	13.8052	13.6824	2	0.0162727	0.00338524	-0.0128875	1	0	0	2	1450
NM_015765	Hspa14	chr2_3428086-3432087	TSS11652	71.879	69.2693	80.3655	1	-0.0533535	0.161004	0.214357	1	0	0	1	1450
NM_026045	Prpf18	chr2_4571132-4575133	TSS11653	12.021	12.481	11.2942	1	0.0541722	-0.0899671	-0.144139	1	0	0	2	825
NM_027290	Mcm10	chr2_4931837-4935838	TSS11654	31.2919	29.4645	28.7047	1	-0.0868086	-0.124498	-0.0376895	1	0	0	2	1650
NM_181848	Optn	chr2_4982984-4986985	TSS11655	21.3513	20.4183	18.2448	1	-0.0644581	-0.226827	-0.162369	1	0	0	1	1075
NM_177343	Camk1d	chr2_5633710-5637711	TSS11656	1.40068	1.22808	1.19889	1	-0.189578	-0.224255	-0.0346767	1	0	0	1	2900
NM_133837	Cdc123	chr2_5764006-5768007	TSS11657	51.7717	43.4971	52.0247	1	-0.251239	0.00703291	0.258272	1	0	0	1	2025
NM_021305	Sec61a2	chr2_5814399-5818400	TSS11658	25.0875	28.6746	24.8697	1	0.192797	-0.0125791	-0.205377	1	0	0	1	1150
NM_001081131	Dhtkd1	chr2_5861838-5865839	TSS11659	6.25003	6.4018	5.66565	1	0.034609	-0.141598	-0.176207	1	0	0	1	1150
NM_021607	Ncstn	chr1_174010880-174014881	TSS1166	14.7948	15.9165	16.6845	1	0.105426	0.173407	0.0679812	1	0	0	1	1325
NM_001159657	5430407P10Rik	chr2_6049231-6053232	TSS11660	1.92097	2.82164	2.38883	2	0.554461	0.314325	-0.240136	2	3	819	1	950
NM_024208	Echdc3	chr2_6132040-6136041	TSS11661	0.604497	0.43921	0.579017	1	-0.459928	-0.0620246	0.397903	1	0	0	1	975
NM_008091	Gata3	chr2_9798227-9802228	TSS11667	0.659668	0.520754	0.604031	1	-0.340556	-0.126916	0.213639	2	3	2526	1	2800
NM_027748	Taf3	chr2_9968236-9972237	TSS11668	8.23887	7.274	8.53083	1	-0.179674	0.0502336	0.229908	1	0	0	2	2150
NM_001112738	Atp5c1	chr2_10000137-10004138	TSS11669	166.721	164.916	166.963	2	-0.0157011	0.00209223	0.0177934	1	0	0	3	2138
NM_011063	Pea15a	chr1_174134912-174138913	TSS1167	5.31408	5.09743	8.81414	1	-0.0600384	0.729892	0.78993	1	0	0	1	1625
NM_001177756	Pfkfb3	chr2_11421717-11425718	TSS11671	4.03804	5.7112	2.54209	8	0.500034	-0.667428	-1.16746	1	0	0	1	3568
NM_001177758	Pfkfb3	chr2_11473556-11477557	TSS11672	1.21421	0.854664	0.810882	5	-0.506094	-0.581868	-0.0757743	1	0	0	1	1875
NM_152824	Rbm17	chr2_11522826-11526827	TSS11673	96.311	91.9927	96.4485	1	-0.0661805	0.0020582	0.0682387	1	0	0	1	1375
NM_015792	Fbxo18	chr2_11697154-11701155	TSS11674	22.2059	20.7369	16.9599	1	-0.0987382	-0.388795	-0.290057	1	0	0	1	2650
NM_001001309	Itga8	chr2_12221547-12225548	TSS11675	0.172958	0.181738	0.311573	1	0.0710376	0.845454	0.774416	2	1	50	1	1025
NM_024185	Fam188a	chr2_12339087-12343088	TSS11676	13.4897	13.9136	15.7007	1	0.0446342	0.218956	0.174321	1	0	0	1	1450
NM_153155	C1ql3	chr2_12930491-12934492	TSS11677	0.0219396	0.075021	0.0214453	1	1.72856	-0.0314269	-1.75998	2	3	3042	1	2275
NM_009105	Rsu1	chr2_13190905-13194906	TSS11678	13.8441	13.5298	13.5299	1	-0.0331283	-0.0331177	1.06623e-05	1	0	0	1	1275
NM_009813	Casq1	chr1_174148026-174152027	TSS1168	0.388865	0.361672	0.501884	1	-0.104309	0.367251	0.47156	1	0	0	1	775
NM_010067	Trdmt1	chr2_13464291-13468292	TSS11680	3.33972	3.21101	2.91709	1	-0.0566827	-0.195135	-0.138452	1	0	0	1	850
NM_145838	St8sia6	chr2_13713147-13717148	TSS11681	0.111476	0.0904454	0.262869	1	-0.298635	1.2302	1.52884	2	2	2025	1	1225
NM_013935	Ptpla	chr2_13975662-13979663	TSS11682	6.58483	6.56339	6.51962	2	-0.00470476	-0.0143563	-0.00965159	1	0	0	1	1700
NM_001165942	Nsun6	chr2_14968939-14972940	TSS11683	4.58718	3.38263	3.22979	4	-0.439353	-0.506036	-0.066683	1	0	0	1	475
NM_001165943	Nsun6	chr2_14974499-14978500	TSS11684	0.0391515	0.972414	0	5	4.59953	-5.32738	-9.92691	1	0	0	1	1600
NM_028757	Nebl	chr2_17650695-17654696	TSS11685	0.104661	0.0883693	0.149393	1	-0.241592	0.509294	0.750886	2	1	850	1	1775
NR_028376	A930004D18Rik	chr2_17957368-17961369	TSS11687	0.692152	0.960306	0.943739	2	0.471824	0.446744	-0.0250799	2	2	3007	1	569
NM_028317	2810030E01Rik	chr2_17968076-17972077	TSS11688	0.864917	1.29291	1.46571	1	0.579437	0.760283	0.180846	2	3	2474	2	2075
NM_007869	Dnajc1	chr2_18312457-18316458	TSS11689	4.41635	5.02926	3.74792	2	0.187452	-0.236706	-0.424158	1	0	0	1	1100
NM_008845	Pip4k2a	chr2_18917748-18921749	TSS11690	5.48083	5.10427	5.13027	1	-0.10267	-0.0953416	0.00732868	2	1	27	1	2275
NM_027600	4921504E06Rik	chr2_19473537-19477538	TSS11691	0	0	0.0240666	1	0	4.64769	4.64769	1	0	0	1	725
NR_033642	Gm3230	chr2_19577524-19581525	TSS11692	0.119001	0.120404	0.155053	1	0.0167695	0.37899	0.36222	1	0	0	1	2475
NM_001081364	Arhgap21	chr2_20887348-20891349	TSS11693	10.0029	12.4496	9.65525	2	0.315653	-0.0510305	-0.366683	1	0	0	1	3374
NM_027728	Enkur	chr2_21124992-21128993	TSS11694	0.0369513	0.112925	0	1	1.58586	-5.24608	-6.83194	1	0	0	1	1425
NM_007380	Abi1	chr2_22893760-22897761	TSS11695	18.3414	19.9676	19.3759	5	0.122546	0.0791501	-0.0433962	1	0	0	1	1150
NM_025979	Mastl	chr2_23009544-23013545	TSS11696	9.73641	10.6863	9.76507	1	0.134287	0.00424003	-0.130047	1	0	0	2	2325
NM_029773	Spopl	chr2_23425624-23429625	TSS11697	6.6835	5.70642	5.10488	5	-0.227981	-0.38866	-0.160679	1	0	0	1	825
NM_030025	Ccdc150	chr1_54305526-54309527	TSS117	0.49424	0.329621	0.403711	1	-0.582949	-0.291236	0.291714	1	0	0	1	775
NM_011040	Pax8	chr2_24329086-24333087	TSS11700	0.134693	0.262088	0.135273	1	0.955199	0.00615345	-0.949046	2	2	1889	1	1764
NM_007579	Cacna1b	chr2_24616672-24620673	TSS11701	0.538251	0.763061	0.605421	1	0.502731	0.169363	-0.333368	1	0	0	1	1850
NM_001042528	Cacna1b	chr2_24616567-24620568	TSS11702	0.184482	0.205669	0.0232951	1	0.156043	-2.93254	-3.08858	1	0	0	1	1850
NM_001012518	Ehmt1	chr2_24773110-24777111	TSS11703	20.8919	21.5711	22.1402	4	0.0461521	0.0837245	0.0375723	1	0	0	2	1825
NM_178408	Arrdc1	chr2_24788801-24792802	TSS11704	8.63722	6.84692	6.78428	5	-0.335068	-0.348324	-0.0132564	1	0	0	1	1875
NM_001031808	Mrpl41	chr2_24828618-24832619	TSS11705	17.1464	13.6982	17.7108	1	-0.323898	0.046721	0.370619	1	0	0	1	2150
NM_001163626	Noxa1	chr2_24948725-24952726	TSS11706	0.102755	0.132778	0.0259495	2	0.366662	-1.94485	-2.31151	1	0	0	2	550
NM_146115	A830007P12Rik	chr2_25050333-25054334	TSS11707	3.91749	3.95609	5.05754	1	0.0141421	0.368423	0.354281	1	0	0	1	2667
NM_021393	Cobra1	chr2_25065009-25069010	TSS11708	25.8736	25.493	25.4641	1	-0.0213788	-0.0230152	-0.00163637	1	0	0	2	2035
NM_028961	4933433C11Rik	chr2_25068150-25072151	TSS11709	0.101309	0.114738	0.0694404	1	0.17793	-0.538458	-0.716388	1	0	0	1	1050
NM_146116	Tubb4b	chr2_25078222-25082223	TSS11710	239.285	241.358	273.407	1	0.0124446	0.192319	0.179875	1	0	0	1	2425
NM_026415	2310002J15Rik	chr2_25093417-25097418	TSS11713	0.635839	0.061315	0.215088	1	-3.35328	-1.55931	1.79397	1	0	0	1	1493
NM_001082476	Ndor1	chr2_25108934-25112935	TSS11714	8.36011	7.66868	7.8963	1	-0.124528	-0.082335	0.0421931	1	0	0	1	2050
NM_023464	Ssna1	chr2_25125938-25129939	TSS11715	28.918	23.4144	28.3817	1	-0.30456	-0.0270058	0.277554	1	0	0	1	2750
NM_008169	Grin1	chr2_25172683-25176684	TSS11716	1.74162	2.64655	1.62703	5	0.603406	-0.0981278	-0.701534	2	1	75	1	950
NR_027448	AA543186	chr2_25186091-25190092	TSS11717	1.34634	0.91625	0.976802	1	-0.554727	-0.4625	0.0922274	1	0	0	1	2300
NM_031843	Dpp7	chr2_25209852-25213853	TSS11718	11.5874	11.9465	14.2777	1	0.0440274	0.301183	0.257156	1	0	0	1	2225
NM_001033293	Uap1l1	chr2_25219146-25223147	TSS11719	86.0541	69.7184	60.5203	1	-0.303701	-0.507818	-0.204117	1	0	0	1	1200
NM_153557	BC029214	chr2_25314614-25318615	TSS11720	1.59072	1.4145	1.32438	1	-0.169275	-0.264181	-0.0949057	1	0	0	1	1075
NM_008963	Ptgds	chr2_25323269-25327270	TSS11721	0.539934	0.56341	0.33143	1	0.061291	-0.702402	-0.763693	1	0	0	1	75
NM_027062	C8g	chr2_25354026-25358027	TSS11723	3.55336	2.12954	1.55087	1	-0.738371	-1.19558	-0.457211	1	0	0	1	2225
NM_009422	Traf2	chr2_25400414-25404415	TSS11724	8.25951	7.29333	6.9469	1	-0.179455	-0.249654	-0.0701985	1	0	0	1	1400
NM_029293	Phpt1	chr2_25428391-25432392	TSS11726	58.2257	50.7968	65.2974	1	-0.196915	0.165367	0.362282	2	1	592	1	1725
NM_001005424	Gm996	chr2_25433619-25437620	TSS11727	0.221298	0.445116	0.169065	1	1.00492	-0.386409	-1.39133	2	1	2156	2	2306
NM_001024616	B230208H17Rik	chr2_25461966-25465967	TSS11728	31.8133	29.2832	28.2278	1	-0.119553	-0.172508	-0.0529547	2	1	1000	1	1175
NM_029859	4921530D09Rik	chr2_25471198-25475199	TSS11729	0.0205642	0	0	1	-4.43057	-4.43057	0	2	3	1400	1	1000
NM_001109993	Tmem141	chr2_25475525-25479526	TSS11730	1.70482	1.93102	1.6411	2	0.179651	-0.05492	-0.234571	1	0	0	1	700
NM_001115076	Camsap1	chr2_25836802-25840803	TSS11734	10.528	12.3111	10.0787	1	0.225708	-0.0629157	-0.288624	1	0	0	2	2025
NM_133835	Ubac1	chr2_25875280-25879281	TSS11735	17.2298	16.4411	19.0877	1	-0.0675951	0.147729	0.215324	1	0	0	1	1575
NM_001037098	Nacc2	chr2_25945916-25949917	TSS11736	0.270226	0	0.0845492	1	-8.08335	-1.66467	6.41868	1	0	0	1	1575
NM_026495	Nacc2	chr2_25976331-25980332	TSS11737	1.94162	2.22745	2.1255	1	0.198037	0.130477	-0.0675597	2	1	250	1	1800
NM_001039653	Lhx3	chr2_26060076-26064077	TSS11738	0.0718999	0.0804086	0.239987	1	0.159264	1.72497	1.5657	2	1	3175	1	875
NM_153559	Qsox2	chr2_26090940-26094941	TSS11739	5.9981	6.60666	6.71026	1	0.139393	0.161838	0.0224442	1	0	0	1	1075
NM_026725	Dusp23	chr1_174561105-174565106	TSS1174	0.781709	0.719437	0.848873	1	-0.119604	0.118771	0.238375	1	0	0	2	1250
NM_001139503	Dnlz	chr2_26205630-26209631	TSS11741	6.52791	6.12623	7.93699	3	-0.0916064	0.281931	0.373538	1	0	0	1	1825
NM_172339	Snapc4	chr2_26234173-26238174	TSS11743	9.65483	9.49382	8.62396	2	-0.0242596	-0.162883	-0.138623	1	0	0	1	950
NM_001085407	Sdccag3	chr2_26242836-26246837	TSS11744	17.9029	17.8607	16.8501	3	-0.00339642	-0.0874228	-0.0840264	1	0	0	1	1875
NM_033134	Inpp5e	chr2_26262708-26266709	TSS11745	3.78357	3.41475	3.25206	1	-0.147927	-0.218332	-0.070405	1	0	0	1	1225
NM_153125	Sec16a	chr2_26298736-26302737	TSS11746	18.3966	17.5329	14.0419	1	-0.0693707	-0.389677	-0.320306	1	0	0	2	2650
NM_008714	Notch1	chr2_26357342-26361343	TSS11747	6.45148	6.05916	5.23451	1	-0.0904979	-0.301524	-0.211026	1	0	0	1	3083
NM_026212	Agpat2	chr2_26457730-26461731	TSS11748	9.40964	8.70037	10.1634	1	-0.11305	0.11116	0.224211	1	0	0	1	2175
NR_024068	Snhg7	chr2_26493764-26497765	TSS11749	20.3687	18.7023	12.9291	1	-0.123132	-0.655691	-0.532559	1	0	0	1	2661
NR_028572	Snora43	chr2_26491505-26495506	TSS11750	17.3345	16.4925	10.6271	1	-0.0718319	-0.705846	-0.634014	1	0	0	3	2681
NR_028571	Snora17	chr2_26492841-26496842	TSS11751	11.876	8.26844	12.4671	1	-0.522309	0.0700712	0.59238	1	0	0	1	3425
NM_009298	Surf6	chr2_26756333-26760334	TSS11754	28.2886	25.5931	26.0265	1	-0.144461	-0.120235	0.0242255	1	0	0	1	2700
NM_011513	Med22	chr2_26764162-26768163	TSS11755	10.8048	11.1269	14.2979	2	0.0423794	0.404094	0.361715	1	0	0	2	3676
NM_013677	Surf1	chr2_26770050-26774051	TSS11756	18.6585	15.3445	14.4608	1	-0.282095	-0.367663	-0.0855685	1	0	0	1	2450
NM_011512	Surf4	chr2_26787031-26791032	TSS11757	45.1594	62.4705	56.8626	1	0.46814	0.332447	-0.135693	1	0	0	1	1875
NM_207234	Rexo4	chr2_26817906-26821907	TSS11758	14.4521	15.1433	16.1251	1	0.0673959	0.158019	0.0906227	1	0	0	1	2100
NM_001177627	Slc2a6	chr2_26881518-26885519	TSS11759	0.410846	0.416691	0.622891	2	0.0203311	0.59919	0.578859	1	0	0	1	700
[truncated: 14,968 more rows]

## Sheet: KS stats
Table S2: Table listing KS statistics and D values generated from the cumulative distribution frequency plots (cdfs) using RNA-Seq analyses
[truncated: 12 more rows]

[truncated: 1 more sheets: QC metrics]
